# Supplementary material for: Enantioselective synthesis of chiral 3-alkyl-3-nitro-4-chromanonesviachiral thiourea-catalysed intramolecular Michael-type cyclization
Source: Royal Society of Chemistry journal article supplement (doi:10.1039/d1ob01296g), 2021-01-01

## Supporting information

# Enantioselective synthesis of chiral 3-alkyl-3-nitro-4-chromanones via chiral thiourea-catalysed intramolecular Michael-type cyclizations

Huiqing Chen, Jie Tang, Ting Liu, Li-Fang Yu, Dong Xing\* and Fan Yang\*

Shanghai Engineering Research Center of Molecular Therapeutics and New Drug  
Development, School of Chemistry and Molecular Engineering, East China Normal  
University, Shanghai, 200062, China. E-mail: dxing@sat.ecnu.edu.cn,  
fyang@chem.ecnu.edu.cn

### Table of Contents

|                                                           |     |
|-----------------------------------------------------------|-----|
| 1. General experimental details .....                     | S2  |
| 2. Experimental procedures and spectral data .....        | S2  |
| 3. References .....                                       | S34 |
| 4. Biology materials and methods .....                    | S34 |
| 5. X-Ray crystallography of <b>3y</b> (CCDC 2094077)..... | S35 |
| 6. Chiral HPLC charts .....                               | S39 |
| 7. NMR charts .....                                       | S70 |

## 1. General experimental details

Unless otherwise noted, materials were purchased from commercial suppliers and used without further purification. All the solvents were treated according to general methods. The progress of reactions was monitored by silica gel thin layer chromatography (TLC) plates, visualized under UV. Flash column chromatography was performed using Qingdao Haiyang 200-300 mesh silica gel. Proton, carbon, and fluorine magnetic resonance spectra ( $^1\text{H}$  NMR,  $^{13}\text{C}$  NMR and  $^{19}\text{F}$  NMR) were recorded on a Bruker Ascend spectrometer ( $^1\text{H}$  NMR at 400 MHz;  $^{13}\text{C}$  NMR at 100 MHz;  $^{19}\text{F}$  NMR at 375 MHz). Chemical shifts ( $\delta$ ) are reported in ppm from the solvent resonance as the internal standard ( $^1\text{H}$  NMR:  $\text{CDCl}_3$  at 7.26 ppm;  $^{13}\text{C}$  NMR:  $\text{CDCl}_3$  at 77.16 ppm). Data are reported as follows: chemical shift, multiplicity (s = singlet, d = doublet, t = triplet, dd = doublet of doublets, m = multiplet), coupling constants (Hz) and integration. Optically rotations were measured on a Rudolph AUTOPOL VI digital

polarimeter with a sodium lamp and reported as follows:  $[\alpha]$  ( $c = \text{g}/100 \text{ mL}$ , solvent). High resolution mass spectra were performed using a Bruker micrOTOF II high resolution mass spectrometer. Melting points were uncorrected and recorded on a WRR melting point apparatus. Diffraction data were collected on Bruker CCD-APEX X-ray diffractometer. Chiral HPLC was performed with a Chiralpak IF column (1 mL/min, 254 nm) eluting with *n*-hexane/*i*PrOH (90:10) at ambient temperature and monitored by DAD (Diode Array Detector).

## 2. Experimental procedures and spectral data

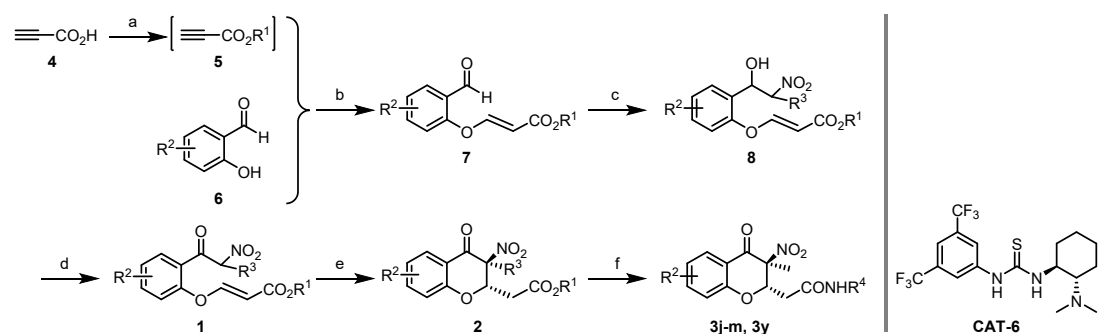

(a)  $\text{R}^1\text{OH}$ ,  $\text{TsOH}$ ,  $\text{PhMe}$ , reflux, Dean-Stark trap; (b) NMM, 0 °C-rt, 33-52% for 2 steps; (c)  $\text{R}^3\text{CH}_2\text{NO}_2$ ,  $\text{KOt-Bu}$  (0.1 equiv.), rt, 83-95%; (d) DMP (1.2 equiv.), dry  $\text{CH}_2\text{Cl}_2$ , rt, 81-95%; (e) **CAT-6** (10 mol%), toluene, -30 °C, 90-99%; (f) 1)  $\text{HCl}/\text{HOAc}$ , 100 °C; 2)  $\text{R}^4\text{NH}_2$ ,  $\text{Et}_3\text{N}$ , HOBT, EDCI,  $\text{CH}_2\text{Cl}_2$ , 0 °C, 52-76%.

Preparation of **7a-b**, **7h**, **8a-b**, **8h**, **1a-b** and **1h** was carried out following the literature procedure.<sup>1</sup>

### General Procedure for the synthesis of 7

Propiolic acid (700 mg, 10.0 mmol, 1 equiv.) and corresponding alcohol  $\text{R}^2\text{OH}$  (10.0 mmol, 1 equiv.) were added to the toluene (20 mL) with 5 mol% *p*-toluenesulfonic acid used as catalyst. A Dean-Stark trap and a condenser were attached, and the reaction was protected under nitrogen. The mixture was heated to reflux for 2 h. Then the mixture was allowed to reach 0 °C. To the mixture was added corresponding salicylaldehyde **6** (10.0 mmol, 1 equiv.) and 4-methylmorpholine (1.2 mmol, 0.2 equiv.). The resulting mixture was allowed to stir at

room temperature for 12 h. Then 1 N HCl (10 mL) was added and the biphasic mixture was allowed to warm to room temperature. The phases were separated and the aqueous phase was extracted with EtOAc (3 × 20 mL). The combined organic extracts were washed with brine (20 mL), then dried over Na<sub>2</sub>SO<sub>4</sub>, filtered and concentrated in vacuo to give a crude residue. The residue was purified by silica gel chromatography (petroleum ether:EtOAc, 20:1-5:1) to afford desired products **7** (33-52%).

2-methoxyethyl (*E*)-3-(2-formylphenoxy)acrylate (**7c**)

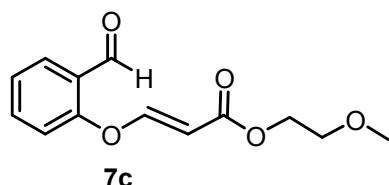

**7c** (1.12 g, 45%), colorless oil. <sup>1</sup>H NMR (400 MHz, CDCl<sub>3</sub>) δ 10.34 (s, 1H), 7.91 (dd, *J* = 8.0, 1.6 Hz, 1H), 7.86 (d, *J* = 12.4 Hz, 1H), 7.66-7.62 (m, 1H), 7.34-7.30 (m, 1H), 7.15 (d, *J* = 8.0 Hz, 1H), 5.65 (d, *J* = 12.0 Hz, 1H), 4.30 (t, *J* = 4.4 Hz, 2H), 3.62 (t, *J* = 4.8 Hz, 2H), 3.39 (s, 3H). <sup>13</sup>C NMR (100 MHz, CDCl<sub>3</sub>) δ 188.20, 166.67, 158.71, 157.55, 136.14, 129.12, 126.74, 125.64, 118.66, 103.81, 70.62, 63.53, 59.12. HRMS (ESI): Calcd for C<sub>13</sub>H<sub>14</sub>NaO<sub>5</sub> [M+Na]<sup>+</sup>: 273.0733. Found: 273.0739.

octyl (*E*)-3-(2-formylphenoxy)acrylate (**7d**)

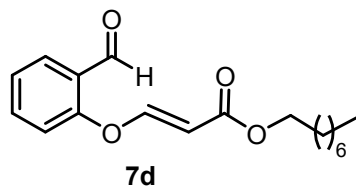

**7d** (1.40 g, 47%), yellow oil. <sup>1</sup>H NMR (400 MHz, CDCl<sub>3</sub>) δ 10.37 (s, 1H), 7.93 (dd, *J* = 8.0, 1.6 Hz, 1H), 7.83 (d, *J* = 12.4 Hz, 1H), 7.66-7.62 (m, 1H), 7.33-7.29 (m, 1H), 7.15 (d, *J* = 8.0 Hz, 1H), 5.63 (d, *J* = 12.0 Hz, 1H), 4.14 (t, *J* = 6.8 Hz, 2H), 1.63 (t, *J* = 5.2 Hz, 2H), 1.35-1.27 (m, 10H), 0.87 (t, *J* = 7.2 Hz, 3H). <sup>13</sup>C NMR (100 MHz, CDCl<sub>3</sub>) δ 188.25, 166.78, 158.06, 157.71, 136.14, 129.10, 126.69, 125.50, 118.40, 104.36, 64.77, 31.90, 29.34, 29.29, 28.80, 26.07, 22.75, 14.20. HRMS (ESI): Calcd for C<sub>18</sub>H<sub>25</sub>O<sub>4</sub> [M+H]<sup>+</sup>: 305.1747. Found: 305.1752.

isopropyl (*E*)-3-(2-formylphenoxy)acrylate (**7e**)

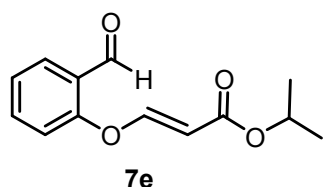

**7e** (0.97 g, 42%), yellow oil. <sup>1</sup>H NMR (400 MHz, CDCl<sub>3</sub>) δ 10.36 (s, 1H), 7.92 (dd, *J* = 8.0, 1.6 Hz, 1H), 7.82 (d, *J* = 12.4 Hz, 1H), 7.66-7.62 (m, 1H), 7.33-7.29 (m, 1H), 7.15 (d, *J* = 8.0 Hz, 1H), 5.60 (d, *J* = 12.0 Hz, 1H), 5.08 (hept, *J* = 6.4 Hz, 1H), 1.27 (d, *J* = 6.4 Hz, 6H). <sup>13</sup>C NMR (100 MHz, CDCl<sub>3</sub>) δ 188.30, 166.23, 157.99, 157.73, 136.16, 129.05, 126.68, 125.49,

118.51, 104.76, 67.90, 22.03 (2C). HRMS (ESI): Calcd for C<sub>13</sub>H<sub>14</sub>NaO<sub>4</sub> [M+Na]<sup>+</sup>: 257.0784. Found: 257.0777.

isobutyl (*E*)-3-(2-formylphenoxy)acrylate (**7f**)

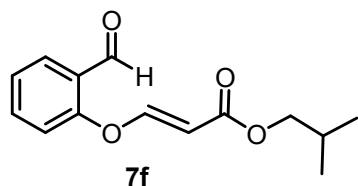

**7f** (1.01 g, 41%), colorless oil. <sup>1</sup>H NMR (400 MHz, CDCl<sub>3</sub>) δ 10.36 (s, 1H), 7.93 (dd, *J* = 8.0, 1.6 Hz, 1H), 7.84 (d, *J* = 12.0 Hz, 1H), 7.67-7.63 (m, 1H), 7.34-7.30 (m, 1H), 7.15 (d, *J* = 8.0 Hz, 1H), 5.65 (d, *J* = 12.0 Hz, 1H), 3.94 (d, *J* = 6.8 Hz, 2H), 1.97 (hept, *J* = 6.8 Hz, 1H), 0.95 (d, *J* = 6.8 Hz, 6H). <sup>13</sup>C NMR (100 MHz, CDCl<sub>3</sub>) δ 188.29, 166.79, 158.06, 157.72, 136.18, 129.13, 126.67, 125.52, 118.38, 104.34, 70.68, 27.92, 19.26 (2C). HRMS (ESI): Calcd for C<sub>14</sub>H<sub>16</sub>NaO<sub>4</sub> [M+Na]<sup>+</sup>: 271.0941. Found: 271.0942.

neopentyl (*E*)-3-(2-formylphenoxy)acrylate (**7g**)

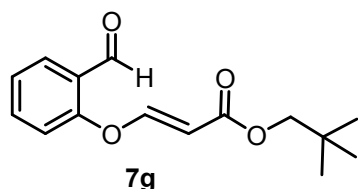

**7g** (1.33 g, 51%), colorless oil. <sup>1</sup>H NMR (400 MHz, CDCl<sub>3</sub>) δ 10.37 (s, 1H), 7.92 (d, *J* = 8.0 Hz, 1H), 7.84 (d, *J* = 12.0 Hz, 1H), 7.67-7.63 (m, 1H), 7.34-7.30 (m, 1H), 7.15 (d, *J* = 8.0 Hz, 1H), 5.67 (d, *J* = 12.0 Hz, 1H), 3.85 (s, 2H), 0.95 (s, 9H). <sup>13</sup>C NMR (100 MHz, CDCl<sub>3</sub>) δ 188.31, 166.85, 157.97, 157.71, 136.21, 129.10, 126.59, 125.49, 118.28, 104.35, 73.83, 31.55, 26.61 (3C). HRMS (ESI): Calcd for C<sub>15</sub>H<sub>18</sub>NaO<sub>4</sub> [M+Na]<sup>+</sup>: 285.1097. Found: 285.1086.

neopentyl (*E*)-3-(2-formyl-4-methylphenoxy)acrylate (**7j**)

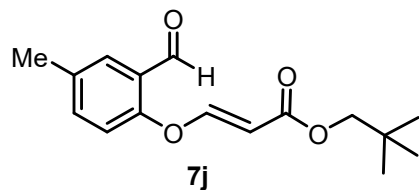

**7j** (1.40 g, 52%), colorless oil. <sup>1</sup>H NMR (400 MHz, CDCl<sub>3</sub>) δ 10.31 (s, 1H), 7.81 (d, *J* = 12.0 Hz, 1H), 7.71 (s, 1H), 7.44 (d, *J* = 8.0 Hz, 1H), 7.04 (d, *J* = 8.0 Hz, 1H), 5.60 (d, *J* = 12.0 Hz, 1H), 3.84 (s, 2H), 2.38 (s, 3H), 0.94 (s, 9H). <sup>13</sup>C NMR (100 MHz, CDCl<sub>3</sub>) δ 188.49, 166.95, 158.64, 155.68, 136.84, 135.51, 129.07, 126.28, 118.49, 103.70, 73.76, 31.53, 26.60, 20.75 (3C). HRMS (ESI): Calcd for C<sub>16</sub>H<sub>20</sub>NaO<sub>4</sub> [M+Na]<sup>+</sup>: 299.1254. Found: 299.1264.

neopentyl (*E*)-3-(4-(*tert*-butyl)-2-formylphenoxy)acrylate (**7k**)

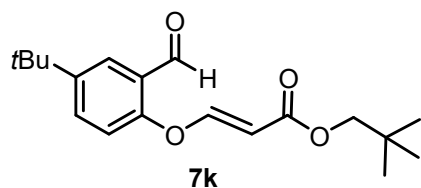

**7k** (1.51 g, 48%), white solid, m.p. 70-71 °C. <sup>1</sup>H NMR (400 MHz, CDCl<sub>3</sub>) δ 10.35 (s, 1H), 7.93 (d, *J* = 2.0 Hz, 1H), 7.83 (d, *J* = 12.0 Hz, 1H), 7.67 (dd, *J* = 8.8, 2.0 Hz, 1H), 7.08 (d, *J* = 8.8 Hz, 1H), 5.63 (d, *J* = 12.0 Hz, 1H), 3.85 (s, 2H), 1.34 (s, 9H), 0.96 (s, 9H). <sup>13</sup>C NMR (100 MHz, CDCl<sub>3</sub>) δ 188.66, 166.96, 158.51, 155.64, 148.81, 133.47, 125.96, 125.57, 118.15, 103.82, 73.78, 34.82, 31.56, 31.33 (3C), 26.62 (3C). HRMS (ESI): Calcd for C<sub>19</sub>H<sub>26</sub>NaO<sub>4</sub> [M+Na]<sup>+</sup>: 341.1723. Found: 341.1735.

neopentyl (*E*)-3-(2-formyl-4-methoxyphenoxy)acrylate (**7l**)

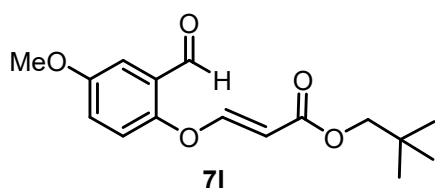

**7l** (1.24 g, 43%), white solid, m.p. 68-70 °C. <sup>1</sup>H NMR (400 MHz, CDCl<sub>3</sub>) δ 10.28 (s, 1H), 7.80 (d, *J* = 12.0 Hz, 1H), 7.37 (d, *J* = 2.0 Hz, 1H), 7.18 (dd, *J* = 8.8, 2.0 Hz, 1H), 7.08 (d, *J* = 8.8 Hz, 1H), 5.52 (d, *J* = 12.0 Hz, 1H), 3.85 (s, 3H), 3.83 (s, 2H), 0.94 (s, 9H). <sup>13</sup>C NMR (100 MHz, CDCl<sub>3</sub>) δ 188.09, 166.95, 159.52, 157.15, 151.69, 127.32, 123.51, 120.66, 110.75, 103.22, 73.75, 56.01, 31.53, 26.60 (3C). HRMS (ESI): Calcd for C<sub>16</sub>H<sub>20</sub>NaO<sub>5</sub> [M+Na]<sup>+</sup>: 315.1203. Found: 315.1213.

neopentyl (*E*)-3-(4-fluoro-2-formylphenoxy)acrylate (**7m**)

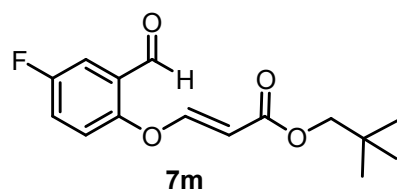

**7m** (1.08 g, 39%), yellow oil. <sup>1</sup>H NMR (400 MHz, CDCl<sub>3</sub>) δ 10.28 (s, 1H), 7.80 (d, *J* = 12.0 Hz, 1H), 7.57 (d, *J* = 8.0 Hz, 1H), 7.37-7.33 (m, 1H), 7.15 (dd, *J* = 8.8, 3.2 Hz, 1H), 5.61 (d, *J* = 12.0 Hz, 1H), 3.84 (s, 2H), 0.94 (s, 9H). <sup>13</sup>C NMR (100 MHz, CDCl<sub>3</sub>) δ 187.06, 166.65, 159.77 (d, *J* = 246.1 Hz, 1C), 158.39, 153.67 (d, *J* = 2.6 Hz, 1C), 127.97 (d, *J* = 6.3 Hz, 1C), 123.05 (d, *J* = 24.1 Hz, 1C), 120.66 (d, *J* = 7.7 Hz, 1C), 114.92 (d, *J* = 23.8 Hz, 1C), 104.31, 73.89, 31.54, 26.59 (3C). HRMS (ESI): Calcd for C<sub>15</sub>H<sub>17</sub>FN<sub>4</sub> [M+Na]<sup>+</sup>: 303.1003. Found: 303.0986.

neopentyl (*E*)-3-(4-chloro-2-formylphenoxy)acrylate (**7n**)

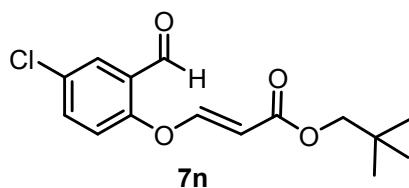

**7n** (1.22 g, 42%), white solid, m.p. 83-84 °C. <sup>1</sup>H NMR (400 MHz, CDCl<sub>3</sub>) δ 10.32 (s, 1H), 7.89 (d, *J* = 2.8 Hz, 1H), 7.80 (d, *J* = 12.0 Hz, 1H), 7.61 (dd, *J* = 8.8, 2.8 Hz, 1H), 7.13 (d, *J* = 8.8 Hz, 1H), 5.69 (d, *J* = 12.0 Hz, 1H), 3.87 (s, 2H), 0.96 (s, 9H). <sup>13</sup>C NMR (100 MHz, CDCl<sub>3</sub>) δ 186.93, 166.56, 157.50, 156.02, 135.84, 131.41, 128.73, 127.50, 119.85, 104.94, 73.94, 31.55, 26.60 (3C). HRMS (ESI): Calcd for C<sub>15</sub>H<sub>17</sub>ClNaO<sub>4</sub> [M+Na]<sup>+</sup>: 319.0708. Found: 319.0725 ([M+Na]<sup>+</sup>), 321.0672 ([M+2+Na]<sup>+</sup>).

neopentyl (*E*)-3-(4-bromo-2-formylphenoxy)acrylate (**7o**)

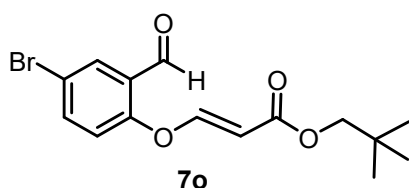

**7o** (1.50 g, 44%), white solid, m.p. 62-63 °C. <sup>1</sup>H NMR (400 MHz, CDCl<sub>3</sub>) δ 10.30 (s, 1H), 8.03 (s, 1H), 7.79 (d, *J* = 12.4 Hz, 1H), 7.74 (dd, *J* = 8.8, 1.6 Hz, 1H), 7.06 (d, *J* = 8.8 Hz, 1H), 5.69 (d, *J* = 12.0 Hz, 1H), 3.87 (s, 2H), 0.96 (s, 9H). <sup>13</sup>C NMR (100 MHz, CDCl<sub>3</sub>) δ 186.85, 166.56, 157.33, 156.54, 138.76, 131.81, 127.77, 120.08, 118.72, 105.05, 73.95, 31.55, 26.60 (3C). HRMS (ESI): Calcd for C<sub>15</sub>H<sub>17</sub>BrNaO<sub>4</sub> [M+Na]<sup>+</sup>: 363.0202. Found: 363.0218 ([M+Na]<sup>+</sup>), 365.0198 ([M+2+Na]<sup>+</sup>).

neopentyl (*E*)-3-(3-fluoro-2-formylphenoxy)acrylate (**7p**)

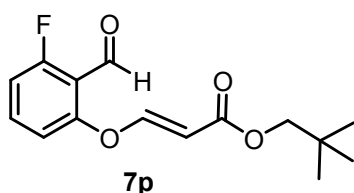

**7p** (0.93 g, 33%), colorless oil. <sup>1</sup>H NMR (400 MHz, CDCl<sub>3</sub>) δ 10.37 (s, 1H), 7.76 (d, *J* = 12.4 Hz, 1H), 7.62-7.58 (m, 1H), 7.05-7.00 (m, 1H), 6.95 (d, *J* = 8.4 Hz, 1H), 5.69 (d, *J* = 12.0 Hz, 1H), 3.85 (s, 2H), 0.95 (s, 9H). <sup>13</sup>C NMR (100 MHz, CDCl<sub>3</sub>) δ 185.67, 185.63, 166.72, 163.44 (d, *J* = 262.5 Hz, 1C), 157.20 (d, *J* = 4.9 Hz, 1C), 157.17, 136.34 (d, *J* = 1.4 Hz, 1C), 116.10 (d, *J* = 9.6 Hz, 1C), 114.20 (d, *J* = 3.7 Hz, 1C), 113.46 (d, *J* = 21.3 Hz, 1C), 73.89, 31.54, 26.60 (3C). HRMS (ESI): Calcd for C<sub>15</sub>H<sub>17</sub>FNaO<sub>4</sub> [M+Na]<sup>+</sup>: 303.1003. Found: 303.1018.

neopentyl (*E*)-3-(3-chloro-2-formylphenoxy)acrylate (**7q**)

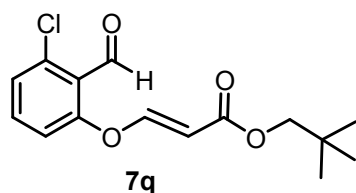

**7q** (1.07 g, 37%), colorless oil.  $^1\text{H NMR}$  (400 MHz,  $\text{CDCl}_3$ )  $\delta$  10.45 (s, 1H), 7.72 (d,  $J = 12.4$  Hz, 1H), 7.54-7.50 (m, 1H), 7.33 (d,  $J = 8.4$  Hz, 1H), 7.07 (d,  $J = 8.4$  Hz, 1H), 5.59 (d,  $J = 12.4$  Hz, 1H), 3.85 (s, 2H), 0.95 (s, 9H).  $^{13}\text{C NMR}$  (100 MHz,  $\text{CDCl}_3$ )  $\delta$  187.75, 166.76, 158.06, 156.94, 137.35, 134.91, 127.91, 124.51, 118.04, 104.17, 73.83, 31.55, 26.61 (3C). HRMS (ESI): Calcd for  $\text{C}_{15}\text{H}_{17}\text{ClNaO}_4$   $[\text{M}+\text{Na}]^+$ : 319.0708. Found: 319.0694 ( $[\text{M}+\text{Na}]^+$ ), 321.0674 ( $[\text{M}+2+\text{Na}]^+$ ).

neopentyl (*E*)-3-(2-formyl-3-methylphenoxy)acrylate (**7r**)

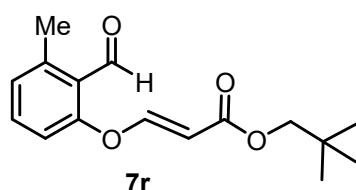

**7r** (1.33 g, 49%), yellow oil.  $^1\text{H NMR}$  (400 MHz,  $\text{CDCl}_3$ )  $\delta$  10.50 (s, 1H), 7.79 (d,  $J = 12.4$  Hz, 1H), 7.49-7.45 (m, 1H), 7.09 (d,  $J = 8.0$  Hz, 1H), 6.98 (d,  $J = 8.4$  Hz, 1H), 5.61 (d,  $J = 12.4$  Hz, 1H), 3.85 (s, 2H), 2.61 (s, 3H), 0.95 (s, 9H).  $^{13}\text{C NMR}$  (100 MHz,  $\text{CDCl}_3$ )  $\delta$  190.62, 166.91, 159.09, 158.44, 142.76, 134.72, 128.80, 125.05, 116.13, 103.93, 73.76, 31.53, 26.60, 21.40 (3C). HRMS (ESI): Calcd for  $\text{C}_{16}\text{H}_{20}\text{NaO}_4$   $[\text{M}+\text{Na}]^+$ : 299.1254. Found: 299.1260.

neopentyl (*E*)-3-(5-fluoro-2-formylphenoxy)acrylate (**7s**)

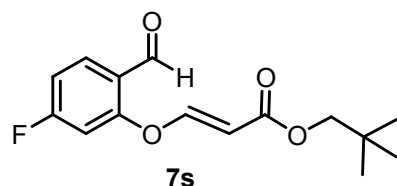

**7s** (1.06 g, 39%), colorless oil.  $^1\text{H NMR}$  (400 MHz,  $\text{CDCl}_3$ )  $\delta$  10.29 (s, 1H), 7.98-7.94 (m, 1H), 7.78 (dd,  $J = 12.4, 1.2$  Hz, 1H), 7.03-6.99 (m, 1H), 6.88 (d,  $J = 9.2$  Hz, 1H), 5.75 (dd,  $J = 12.4, 1.2$  Hz, 1H), 3.86 (d,  $J = 0.8$  Hz, 2H), 0.95 (d,  $J = 1.2$  Hz, 9H).  $^{13}\text{C NMR}$  (100 MHz,  $\text{CDCl}_3$ )  $\delta$  186.79, 167.15 (d,  $J = 257.7$  Hz, 1C), 166.46, 159.10 (d,  $J = 10.7$  Hz, 1C), 156.67, 131.42 (d,  $J = 10.9$  Hz, 1C), 123.20 (d,  $J = 3.1$  Hz, 1C), 112.94 (d,  $J = 21.8$  Hz, 1C), 105.74 (d,  $J = 25.3$  Hz, 1C), 105.59, 73.98, 31.55, 26.60 (3C). HRMS (ESI): Calcd for  $\text{C}_{15}\text{H}_{17}\text{FNaO}_4$   $[\text{M}+\text{Na}]^+$ : 303.1003. Found: 303.1012.

neopentyl (*E*)-3-(5-chloro-2-formylphenoxy)acrylate (**7t**)

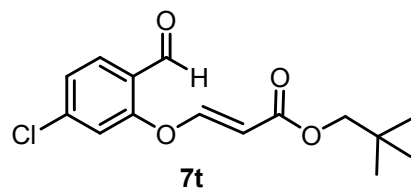

**7t** (1.24 g, 43%), white solid, m.p. 52-53 °C.  $^1\text{H NMR}$  (400 MHz,  $\text{CDCl}_3$ )  $\delta$  10.31 (s, 1H), 7.87 (d,  $J = 8.4$  Hz, 1H), 7.78 (d,  $J = 12.4$  Hz, 1H), 7.29 (d,  $J = 8.4$  Hz, 1H), 7.17 (d,  $J = 1.2$  Hz, 1H), 5.75 (d,  $J = 12.4$  Hz, 1H), 3.87 (s, 2H), 0.95 (s, 9H).  $^{13}\text{C NMR}$  (100 MHz,  $\text{CDCl}_3$ )  $\delta$  187.11, 166.51, 157.94, 156.90, 142.15, 130.17, 125.95, 124.97, 118.57, 105.50, 74.00, 31.57, 26.61 (3C). HRMS (ESI): Calcd for  $\text{C}_{15}\text{H}_{17}\text{ClNaO}_4$   $[\text{M}+\text{Na}]^+$ : 319.0708. Found: 319.0724 ( $[\text{M}+\text{Na}]^+$ ), 321.0670 ( $[\text{M}+2+\text{Na}]^+$ ).

neopentyl (*E*)-3-(2-formyl-5-methylphenoxy)acrylate (**7u**)

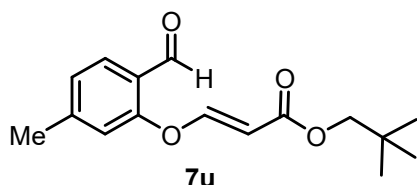

**7u** (1.38 g, 51%), colorless oil.  $^1\text{H NMR}$  (400 MHz,  $\text{CDCl}_3$ )  $\delta$  10.31 (s, 1H), 7.83 (d,  $J = 12.4$  Hz, 1H), 7.82 (d,  $J = 8.0$  Hz, 1H), 7.12 (d,  $J = 8.0$  Hz, 1H), 6.94 (s, 1H), 5.66 (d,  $J = 12.4$  Hz, 1H), 3.87 (s, 2H), 2.44 (s, 3H), 0.95 (s, 9H).  $^{13}\text{C NMR}$  (100 MHz,  $\text{CDCl}_3$ )  $\delta$  188.02, 167.01, 158.17, 157.77, 148.02, 129.02, 126.46, 124.31, 118.79, 104.12, 73.82, 31.57, 26.63, 22.16 (3C). HRMS (ESI): Calcd for  $\text{C}_{16}\text{H}_{20}\text{NaO}_4$   $[\text{M}+\text{Na}]^+$ : 299.1254. Found: 299.1277.

neopentyl (*E*)-3-(6-fluoro-2-formylphenoxy)acrylate (**7v**)

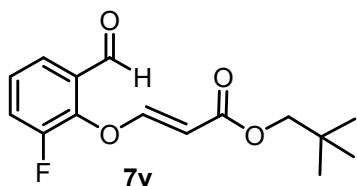

**7v** (1.21 g, 44%), colorless oil.  $^1\text{H NMR}$  (400 MHz,  $\text{CDCl}_3$ )  $\delta$  10.24 (s, 1H), 7.82 (d,  $J = 12.4$  Hz, 1H), 7.73 (d,  $J = 8.0$  Hz, 1H), 7.49-7.45 (m, 1H), 7.38-7.33 (m, 1H), 5.38 (d,  $J = 12.4$  Hz, 1H), 3.83 (s, 2H), 0.95 (s, 9H).  $^{13}\text{C NMR}$  (100 MHz,  $\text{CDCl}_3$ )  $\delta$  187.17 (d,  $J = 3.3$  Hz, 1C), 166.52, 160.17 (d,  $J = 2.4$  Hz, 1C), 154.07 (d,  $J = 251.9$  Hz, 1C), 144.22 (d,  $J = 12.5$  Hz, 1C), 129.81, 127.05 (d,  $J = 7.0$  Hz, 1C), 124.33 (d,  $J = 3.6$  Hz, 1C), 123.22 (d,  $J = 18.3$  Hz, 1C), 102.50, 73.90, 31.53, 26.60 (3C). HRMS (ESI): Calcd for  $\text{C}_{15}\text{H}_{17}\text{FNaO}_4$   $[\text{M}+\text{Na}]^+$ : 303.1003. Found: 303.1019.

neopentyl (*E*)-3-(6-chloro-2-formylphenoxy)acrylate (**7w**)

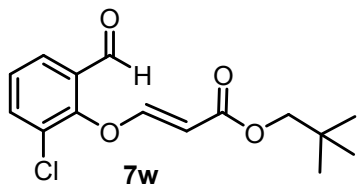

**7w** (1.37 g, 47%), yellow oil.  $^1\text{H NMR}$  (400 MHz,  $\text{CDCl}_3$ )  $\delta$  10.18 (s, 1H), 7.85 (dd,  $J = 8.0, 1.2$  Hz, 1H), 7.80 (d,  $J = 12.4$  Hz, 1H), 7.73 (dd,  $J = 8.0, 1.2$  Hz, 1H), 7.39-7.35 (m, 1H), 5.20 (d,  $J = 12.4$  Hz, 1H), 3.83 (s, 2H), 0.93 (s, 9H).  $^{13}\text{C NMR}$  (100 MHz,  $\text{CDCl}_3$ )  $\delta$  187.43, 166.61, 160.13, 152.43, 136.78, 129.86, 127.98, 127.71, 127.52, 102.17, 73.92, 31.51, 26.60 (3C). HRMS (ESI): Calcd for  $\text{C}_{15}\text{H}_{17}\text{ClNaO}_4$   $[\text{M}+\text{Na}]^+$ : 319.0708. Found: 319.0724



$[\text{M}+\text{Na}]^+$ , 321.0684 ( $[\text{M}+2+\text{Na}]^+$ ).

neopentyl (*E*)-3-(2-formyl-6-methylphenoxy)acrylate (**7x**)

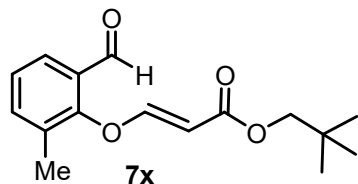

**7x** (1.44 g, 52%), colorless oil.  $^1\text{H NMR}$  (400 MHz,  $\text{CDCl}_3$ )  $\delta$  10.18 (s, 1H), 7.84 (d,  $J = 12.4$  Hz, 1H), 7.79 (d,  $J = 8.0$  Hz, 1H), 7.54 (d,  $J = 8.0$  Hz, 1H), 7.34-7.30 (m, 1H), 5.06 (d,  $J = 12.4$  Hz, 1H), 3.80 (s, 2H), 2.28 (s, 3H), 0.93 (s, 9H).  $^{13}\text{C NMR}$  (100 MHz,  $\text{CDCl}_3$ )  $\delta$  188.65, 166.92, 160.92, 154.63, 137.98, 131.52, 128.18, 127.24, 126.72, 101.11, 73.77, 31.51, 26.62 (3C), 15.69. HRMS (ESI): Calcd for  $\text{C}_{16}\text{H}_{20}\text{NaO}_4$   $[\text{M}+\text{Na}]^+$ : 299.1254. Found: 299.1258.

### General Procedure for the synthesis of **8**

To a solution of compound **7** (3 mmol, 1 equiv.) in 5 mL of  $\text{R}^3\text{CH}_2\text{NO}_2$  was added 56 mg (0.3 mmol, 0.1 equiv.) of  $\text{KO}t\text{-Bu}$ . The resulting mixture was stirred at room temperature for 2 h. 1 N HCl (10 mL) was added and the biphasic mixture was extracted with EtOAc ( $3 \times 20$  mL). The combined organic extracts were washed with brine (20 mL), then dried over  $\text{Na}_2\text{SO}_4$ , filtered and concentrated in vacuo to give a crude residue. The residue was purified by silica gel chromatography (petroleum ether:EtOAc:HOAc, 100:20:0.5) to afford desired products **8** (83-95%).

2-methoxyethyl (*E*)-3-(2-(1-hydroxy-2-nitropropyl)phenoxy)acrylate (**8c**)

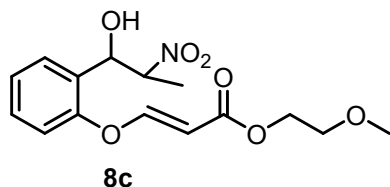

**8c** (895.8 mg, 92%), colorless oil.  $^1\text{H NMR}$  (400 MHz,  $\text{CDCl}_3$ )  $\delta$  7.78 (d,  $J = 12.4$  Hz, 1H), 7.51-7.49 (m, 1H), 7.41-7.37 (m, 1H), 7.27 (d,  $J = 8.0$  Hz, 1H), 7.07 (d,  $J = 8.0$  Hz, 1H), 5.62 (d,  $J = 12.4$  Hz, 1H), 5.35 (d,  $J = 8.8$  Hz, 1H), 4.85-4.78 (m, 1H), 4.27 (t,  $J = 4.8$  Hz, 2H), 3.61 (t,  $J = 4.8$  Hz, 2H), 3.38 (s, 3H), 3.18 (br s, 1H), 1.35 (d,  $J = 6.8$  Hz, 3H).  $^{13}\text{C NMR}$  (100 MHz,  $\text{CDCl}_3$ )  $\delta$  166.97, 158.89, 152.92, 130.57, 129.26, 128.60, 126.05, 118.18, 103.11, 88.14, 70.61, 70.28, 63.47, 59.08, 16.34. HRMS (ESI): Calcd for  $\text{C}_{15}\text{H}_{19}\text{NNaO}_7$   $[\text{M}+\text{Na}]^+$ : 348.1054. Found: 348.1077.

octyl (*E*)-3-(2-(1-hydroxy-2-nitropropyl)phenoxy)acrylate (**8d**)

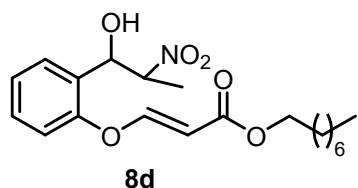

**8d** (1.04 g, 93%), yellow oil.  $^1\text{H NMR}$  (400 MHz,  $\text{CDCl}_3$ )  $\delta$  7.74 (d,  $J = 12.4$  Hz, 1H),

7.51-7.49 (m, 1H), 7.41-7.37 (m, 1H), 7.27 (d,  $J = 8.0$  Hz, 1H), 7.07 (d,  $J = 8.0$  Hz, 1H), 5.62 (d,  $J = 12.4$  Hz, 1H), 5.35 (d,  $J = 8.8$  Hz, 1H), 4.85-4.78 (m, 1H), 4.12 (t,  $J = 4.8$  Hz, 2H), 3.08 (br s, 1H), 1.66-1.61 (m, 2H), 1.37 (d,  $J = 6.8$  Hz, 3H), 1.32-1.25 (m, 10H), 0.88 (t,  $J = 6.8$  Hz, 3H).  $^{13}\text{C}$  NMR (100 MHz,  $\text{CDCl}_3$ )  $\delta$  167.15, 158.24, 153.07, 130.59, 129.08, 128.60, 125.91, 117.91, 103.71, 88.12, 70.40, 64.81, 31.91, 29.35, 29.30, 28.79, 26.07, 22.76, 16.36, 14.20. HRMS (ESI): Calcd for  $\text{C}_{20}\text{H}_{29}\text{NNaO}_6$   $[\text{M}+\text{Na}]^+$ : 402.1892. Found: 402.1899.

isopropyl (*E*)-3-(2-(1-hydroxy-2-nitropropyl)phenoxy)acrylate (**8e**)

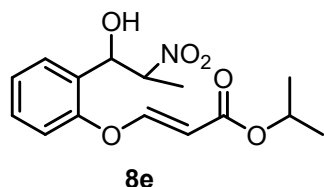

**8e** (816.4 mg, 88%), yellow oil.  $^1\text{H}$  NMR (400 MHz,  $\text{CDCl}_3$ )  $\delta$  7.72 (d,  $J = 12.4$  Hz, 1H), 7.50 (d,  $J = 8.0$  Hz, 1H), 7.41-7.37 (m, 1H), 7.28-7.26 (m, 1H), 7.07 (d,  $J = 8.0$  Hz, 1H), 5.59 (d,  $J = 12.4$  Hz, 1H), 5.36 (d,  $J = 8.8$  Hz, 1H), 5.07 (hept,  $J = 2.4$  Hz, 1H), 4.87-4.79 (m, 1H), 3.04 (br s, 1H), 1.37 (d,  $J = 6.8$  Hz, 3H), 1.26 (d,  $J = 6.8$  Hz, 6H).  $^{13}\text{C}$  NMR (100 MHz,  $\text{CDCl}_3$ )  $\delta$  166.56, 158.07, 153.07, 130.58, 129.07, 128.59, 125.88, 117.96, 104.15, 88.13, 70.44, 67.96, 22.03 (2C), 16.37. HRMS (ESI): Calcd for  $\text{C}_{15}\text{H}_{19}\text{NNaO}_6$   $[\text{M}+\text{Na}]^+$ : 332.1105. Found: 332.1127.

isobutyl (*E*)-3-(2-(1-hydroxy-2-nitropropyl)phenoxy)acrylate (**8f**)

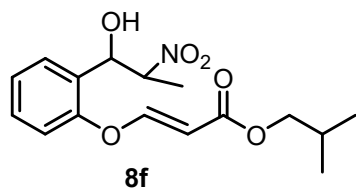

**8f** (883.2 mg, 91%), yellow oil.  $^1\text{H}$  NMR (400 MHz,  $\text{CDCl}_3$ )  $\delta$  7.74 (d,  $J = 12.4$  Hz, 1H), 7.51-7.49 (m, 1H), 7.42-7.38 (m, 1H), 7.27 (d,  $J = 8.0$  Hz, 1H), 7.07 (d,  $J = 8.0$  Hz, 1H), 5.63 (d,  $J = 12.4$  Hz, 1H), 5.37 (d,  $J = 8.8$  Hz, 1H), 4.87-4.79 (m, 1H), 3.91 (d,  $J = 6.8$  Hz, 2H), 3.04 (br s, 1H), 1.96 (hept,  $J = 6.4$  Hz, 1H), 1.37 (d,  $J = 6.8$  Hz, 3H), 0.94 (d,  $J = 6.0$  Hz, 6H).  $^{13}\text{C}$  NMR (100 MHz,  $\text{CDCl}_3$ )  $\delta$  167.15, 158.22, 153.06, 130.61, 129.02, 128.60, 125.92, 117.85, 103.68, 88.12, 70.70, 70.39, 27.89, 19.24 (2C), 16.36. HRMS (ESI): Calcd for  $\text{C}_{16}\text{H}_{21}\text{NNaO}_6$   $[\text{M}+\text{Na}]^+$ : 346.1261. Found: 346.1268.

neopentyl (*E*)-3-(2-(1-hydroxy-2-nitropropyl)phenoxy)acrylate (**8g**)

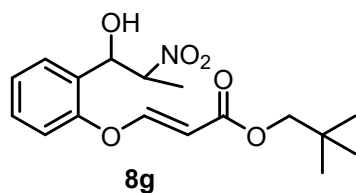

**8g** (930.3 mg, 92%), yellow solid, m.p. 75-76 °C.  $^1\text{H}$  NMR (400 MHz,  $\text{CDCl}_3$ )  $\delta$  7.75 (d,  $J = 12.4$  Hz, 1H), 7.51-7.49 (m, 1H), 7.42-7.38 (m, 1H), 7.27 (d,  $J = 8.0$  Hz, 1H), 7.07 (d,  $J = 8.0$  Hz, 1H), 5.66 (d,  $J = 12.4$  Hz, 1H), 5.38 (d,  $J = 8.8$  Hz, 1H), 4.87-4.79 (m, 1H), 3.84 (s,

2H), 2.99 (br s, 1H), 1.37 (d,  $J = 6.8$  Hz, 3H), 0.96 (s, 9H).  $^{13}\text{C}$  NMR (100 MHz,  $\text{CDCl}_3$ )  $\delta$  167.17, 158.12, 153.10, 130.62, 129.00, 128.61, 125.89, 117.76, 103.75, 88.11, 73.87, 70.42, 31.54, 26.61 (3C), 16.36. HRMS (ESI): Calcd for  $\text{C}_{17}\text{H}_{23}\text{NNaO}_6$   $[\text{M}+\text{Na}]^+$ : 360.1418. Found: 360.1427.

neopentyl (*E*)-3-(2-(1-hydroxy-2-nitrobutyl)phenoxy)acrylate (**8i**)

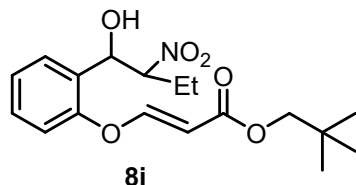

**8i** (966.3 mg, 92%), colorless oil.  $^1\text{H}$  NMR (400 MHz,  $\text{CDCl}_3$ )  $\delta$  7.75 (d,  $J = 12.0$  Hz, 1H), 7.49 (d,  $J = 8.0$  Hz, 1H), 7.41-7.38 (m, 1H), 7.28-7.24 (m, 1H), 7.07 (d,  $J = 8.0$  Hz, 1H), 5.66 (d,  $J = 12.0$  Hz, 1H), 5.37 (d,  $J = 8.4$  Hz, 1H), 4.71-4.66 (m, 1H), 3.84 (s, 2H), 2.95 (br s, 1H), 1.99-1.91 (m, 1H), 1.52-1.45 (m, 1H), 0.96 (s, 9H), 0.90 (t,  $J = 7.2$  Hz, 3H).  $^{13}\text{C}$  NMR (100 MHz,  $\text{CDCl}_3$ )  $\delta$  167.18, 158.11, 153.03, 130.60, 129.24, 128.54, 125.92, 117.75, 103.73, 94.81, 73.88, 69.67, 31.54, 26.61 (3C), 23.82, 10.32. HRMS (ESI): Calcd for  $\text{C}_{18}\text{H}_{25}\text{NNaO}_6$   $[\text{M}+\text{Na}]^+$ : 374.1574. Found: 374.1589.

neopentyl (*E*)-3-(2-(1-hydroxy-2-nitropropyl)-4-methylphenoxy)acrylate (**8j**)

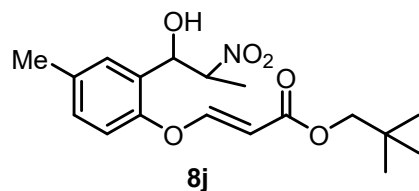

**8j** (977.5 mg, 93%), yellow solid, m.p. 70-71 °C.  $^1\text{H}$  NMR (400 MHz,  $\text{CDCl}_3$ )  $\delta$  7.74 (d,  $J = 12.0$  Hz, 1H), 7.40 (s, 1H), 7.16 (d,  $J = 8.0$  Hz, 1H), 6.93 (d,  $J = 8.0$  Hz, 1H), 5.63-5.61 (m, 1H), 5.60 (d,  $J = 12.0$  Hz, 1H), 4.80-4.74 (m, 1H), 3.84 (s, 2H), 2.91 (d,  $J = 4.0$  Hz, 1H), 2.36 (s, 3H), 1.46 (d,  $J = 6.8$  Hz, 3H), 0.95 (s, 9H).  $^{13}\text{C}$  NMR (100 MHz,  $\text{CDCl}_3$ )  $\delta$  167.23, 158.38, 149.93, 135.45, 130.51, 128.44, 128.37, 117.35, 103.14, 85.21, 73.79, 69.06, 31.54, 26.62 (3C), 21.09, 11.99. HRMS (ESI): Calcd for  $\text{C}_{18}\text{H}_{25}\text{NNaO}_6$   $[\text{M}+\text{Na}]^+$ : 374.1574. Found: 374.1565.

neopentyl (*E*)-3-(4-(tert-butyl)-2-(1-hydroxy-2-nitropropyl)phenoxy)acrylate (**8k**)

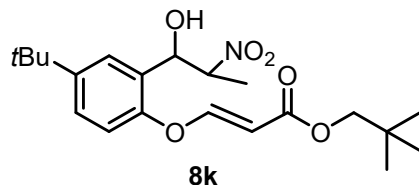

**8k** (1.02 g, 87%), colorless oil.  $^1\text{H}$  NMR (400 MHz,  $\text{CDCl}_3$ )  $\delta$  7.76 (d,  $J = 12.0$  Hz, 1H), 7.61 (d,  $J = 1.6$  Hz, 1H), 7.37 (dd,  $J = 8.0, 1.6$  Hz, 1H), 6.97 (d,  $J = 8.0$  Hz, 1H), 5.66-5.64 (m, 1H), 5.63 (d,  $J = 12.0$  Hz, 1H), 4.80-4.74 (m, 1H), 3.84 (s, 2H), 2.92 (d,  $J = 3.2$  Hz, 1H), 1.45 (d,  $J = 6.8$  Hz, 3H), 1.33 (s, 9H), 0.95 (s, 9H).  $^{13}\text{C}$  NMR (100 MHz,  $\text{CDCl}_3$ )  $\delta$  167.21, 158.26, 149.84, 148.71, 127.92, 126.81, 125.01, 116.86, 103.24, 85.25, 73.78, 69.24, 34.80, 31.54,

31.49 (3C), 26.63 (3C), 11.94. HRMS (ESI): Calcd for C<sub>21</sub>H<sub>31</sub>NNaO<sub>6</sub> [M+Na]<sup>+</sup>: 416.2044. Found: 416.2059.

neopentyl (*E*)-3-(2-(1-hydroxy-2-nitropropyl)-4-methoxyphenoxy)acrylate (**8l**)

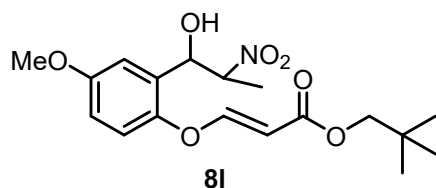

**8l** (915.4 mg, 84%), colorless oil. <sup>1</sup>H NMR (400 MHz, CDCl<sub>3</sub>) δ 7.71 (d, *J* = 12.0 Hz, 1H), 7.01 (d, *J* = 2.8 Hz, 1H), 7.00 (d, *J* = 8.8 Hz, 1H), 6.90 (dd, *J* = 8.8, 2.8 Hz, 1H), 5.54 (d, *J* = 12.0 Hz, 1H), 5.33-5.30 (m, 1H), 4.84-4.77 (m, 1H), 3.84 (s, 2H), 3.82 (s, 3H), 2.80 (d, *J* = 4.2 Hz, 1H), 1.39 (d, *J* = 6.8 Hz, 3H), 0.95 (s, 9H). <sup>13</sup>C NMR (100 MHz, CDCl<sub>3</sub>) δ 167.20, 159.33, 157.47, 146.59, 130.23, 119.72, 115.79, 113.20, 102.76, 88.12, 73.79, 70.40, 55.92, 31.56, 26.64 (3C), 16.40. HRMS (ESI): Calcd for C<sub>18</sub>H<sub>25</sub>NNaO<sub>7</sub> [M+Na]<sup>+</sup>: 390.1523. Found: 390.1538.

neopentyl (*E*)-3-(4-fluoro-2-(1-hydroxy-2-nitropropyl)phenoxy)acrylate (**8m**)

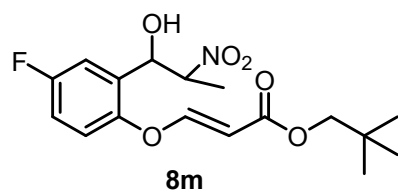

**8m** (903.9 mg, 85%), colorless oil. <sup>1</sup>H NMR (400 MHz, CDCl<sub>3</sub>) δ 7.68 (d, *J* = 12.0 Hz, 1H), 7.25-7.24 (m, 1H), 7.11-7.03 (m, 2H), 5.60 (d, *J* = 12.0 Hz, 1H), 5.34 (d, *J* = 8.0 Hz, 1H), 4.81-4.74 (m, 1H), 3.83 (s, 2H), 3.16 (br s, 1H), 1.41 (d, *J* = 6.8 Hz, 3H), 0.95 (s, 9H). <sup>13</sup>C NMR (100 MHz, CDCl<sub>3</sub>) δ 167.14, 160.06 (d, *J* = 244.7 Hz, 1C), 158.53, 148.79 (d, *J* = 2.7 Hz, 1C), 131.39 (d, *J* = 7.1 Hz, 1C), 119.74 (d, *J* = 8.2 Hz, 1C), 117.24 (d, *J* = 23.5 Hz, 1C), 115.34 (d, *J* = 24.3 Hz, 1C), 103.58, 87.86, 73.96, 69.73, 31.53, 26.60 (3C), 16.24. HRMS (ESI): Calcd for C<sub>17</sub>H<sub>22</sub>FNNaO<sub>6</sub> [M+Na]<sup>+</sup>: 378.1323. Found: 378.1332.

neopentyl (*E*)-3-(4-chloro-2-(1-hydroxy-2-nitropropyl)phenoxy)acrylate (**8n**)

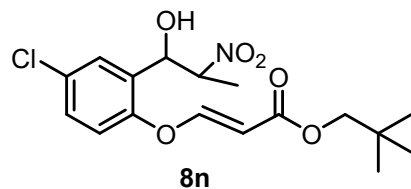

**8n** (950.3 mg, 86%), colorless oil. <sup>1</sup>H NMR (400 MHz, CDCl<sub>3</sub>) δ 7.70 (d, *J* = 12.0 Hz, 1H), 7.63 (s, 1H), 7.34 (d, *J* = 8.4 Hz, 1H), 7.00 (d, *J* = 8.4 Hz, 1H), 5.69-5.67 (m, 1H), 5.66 (d, *J* = 12.0 Hz, 1H), 4.78-4.73 (m, 1H), 3.84 (s, 2H), 3.14 (br s, 1H), 1.44 (d, *J* = 6.8 Hz, 3H), 0.95 (s, 9H). <sup>13</sup>C NMR (100 MHz, CDCl<sub>3</sub>) δ 166.97, 157.38, 150.38, 131.16, 130.75, 129.96, 128.30, 118.49, 104.20, 84.72, 73.98, 68.46, 31.53, 26.60 (3C), 11.64. HRMS (ESI): Calcd for C<sub>17</sub>H<sub>22</sub>ClNNaO<sub>6</sub> [M+Na]<sup>+</sup>: 394.1028. Found: 394.1029 ([M+Na]<sup>+</sup>), 396.1005 ([M+2+Na]<sup>+</sup>).

neopentyl (*E*)-3-(4-bromo-2-(1-hydroxy-2-nitropropyl)phenoxy)acrylate (**8o**)

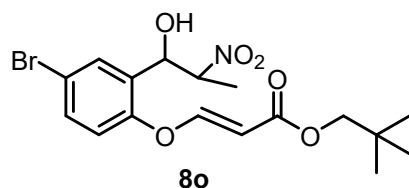

**8o** (1.08 g, 88%), colorless oil.  $^1\text{H NMR}$  (400 MHz,  $\text{CDCl}_3$ )  $\delta$  7.77 (d,  $J = 1.6$  Hz, 1H), 7.70 (d,  $J = 12.0$  Hz, 1H), 7.50 (dd,  $J = 8.4, 1.6$  Hz, 1H), 6.94 (d,  $J = 8.4$  Hz, 1H), 5.69-5.67 (m, 1H), 5.66 (d,  $J = 12.0$  Hz, 1H), 4.78-4.73 (m, 1H), 3.84 (s, 2H), 3.10 (br s, 1H), 1.45 (d,  $J = 6.8$  Hz, 3H), 0.95 (s, 9H).  $^{13}\text{C NMR}$  (100 MHz,  $\text{CDCl}_3$ )  $\delta$  166.94, 157.20, 150.95, 132.96, 131.21, 130.99, 118.77, 118.64, 104.33, 84.73, 73.99, 68.41, 31.53, 26.60 (3C), 11.66. HRMS (ESI): Calcd for  $\text{C}_{17}\text{H}_{22}\text{BrNNaO}_6$   $[\text{M}+\text{Na}]^+$ : 438.0528. Found: 438.0559 ( $[\text{M}+\text{Na}]^+$ ), 440.0537 ( $[\text{M}+2+\text{Na}]^+$ ).

neopentyl (*E*)-3-(3-fluoro-2-(1-hydroxy-2-nitropropyl)phenoxy)acrylate (**8p**)

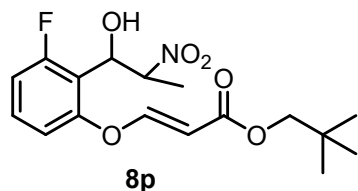

**8p** (883.7 mg, 83%), colorless oil.  $^1\text{H NMR}$  (400 MHz,  $\text{CDCl}_3$ )  $\delta$  7.73 (d,  $J = 12.0$  Hz, 1H), 7.43-7.37 (m, 1H), 7.02-6.98 (m, 1H), 6.93 (d,  $J = 8.4$  Hz, 1H), 5.78 (d,  $J = 12.0$  Hz, 1H), 5.55-5.51 (m, 1H), 5.15-5.08 (m, 1H), 3.86 (s, 2H), 2.90 (d,  $J = 8.0$  Hz, 1H), 1.36 (d,  $J = 6.8$  Hz, 3H), 0.97 (s, 9H).  $^{13}\text{C NMR}$  (100 MHz,  $\text{CDCl}_3$ )  $\delta$  166.73, 158.63, 157.08, 154.84 (d,  $J = 7.3$  Hz, 1C), 131.47 (d,  $J = 6.7$  Hz, 1C), 116.48 (d,  $J = 5.9$  Hz, 1C), 113.69 (d,  $J = 3.4$  Hz, 1C), 113.06 (d,  $J = 22.7$  Hz, 1C), 105.05, 86.73, 74.00, 68.36 (d,  $J = 2.8$  Hz, 1C), 31.56, 26.62 (3C), 16.46. HRMS (ESI): Calcd for  $\text{C}_{17}\text{H}_{22}\text{FNNaO}_6$   $[\text{M}+\text{Na}]^+$ : 378.1323. Found: 378.1326.

neopentyl (*E*)-3-(3-chloro-2-(1-hydroxy-2-nitropropyl)phenoxy)acrylate (**8q**)

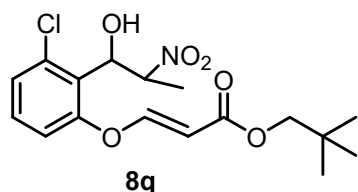

**8q** (922.1 mg, 83%), colorless oil.  $^1\text{H NMR}$  (400 MHz,  $\text{CDCl}_3$ )  $\delta$  7.70 (d,  $J = 12.0$  Hz, 1H), 7.37-7.30 (m, 1H), 7.29-7.28 (m, 1H), 7.04 (d,  $J = 8.4$  Hz, 1H), 5.78 (d,  $J = 12.0$  Hz, 1H), 5.75 (d,  $J = 8.4$  Hz, 1H), 5.25-5.18 (m, 1H), 3.86 (s, 2H), 3.15 (br s, 1H), 1.37 (d,  $J = 6.8$  Hz, 3H), 0.96 (s, 9H).  $^{13}\text{C NMR}$  (100 MHz,  $\text{CDCl}_3$ )  $\delta$  166.72, 157.04, 155.43, 135.24, 131.06, 127.19, 126.39, 117.03, 105.17, 86.64, 74.03, 71.56, 31.54, 26.61 (3C), 16.31. HRMS (ESI): Calcd for  $\text{C}_{17}\text{H}_{22}\text{ClNNaO}_6$   $[\text{M}+\text{Na}]^+$ : 394.1028. Found: 394.1029 ( $[\text{M}+\text{Na}]^+$ ), 396.0994 ( $[\text{M}+2+\text{Na}]^+$ ).

neopentyl (*E*)-3-(2-(1-hydroxy-2-nitropropyl)-3-methylphenoxy)acrylate (**8r**)

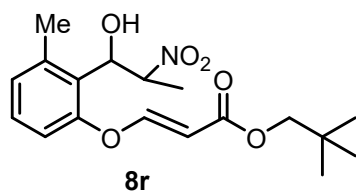

**8r** (985.2 mg, 94%), colorless oil.  $^1\text{H NMR}$  (400 MHz,  $\text{CDCl}_3$ )  $\delta$  7.75 (d,  $J = 12.0$  Hz, 1H), 7.31-7.27 (m, 1H), 7.07 (d,  $J = 8.0$  Hz, 1H), 6.94 (d,  $J = 8.0$  Hz, 1H), 5.75 (d,  $J = 12.0$  Hz, 1H), 5.70-5.46 (m, 1H), 5.19-5.11 (m, 1H), 3.86 (s, 2H), 2.86 (d,  $J = 8.0$  Hz, 1H), 2.51 (s, 3H), 1.31 (d,  $J = 6.8$  Hz, 3H), 0.97 (s, 9H).  $^{13}\text{C NMR}$  (100 MHz,  $\text{CDCl}_3$ )  $\delta$  166.95, 157.61, 154.66, 139.30, 130.25, 128.33, 126.32, 115.94, 104.34, 87.30, 73.91, 71.26, 31.55, 26.64 (3C), 20.55, 16.46. HRMS (ESI): Calcd for  $\text{C}_{18}\text{H}_{25}\text{NNaO}_6$   $[\text{M}+\text{Na}]^+$ : 374.1574. Found: 374.1588.

neopentyl (*E*)-3-(5-fluoro-2-(1-hydroxy-2-nitropropyl)phenoxy)acrylate (**8s**)

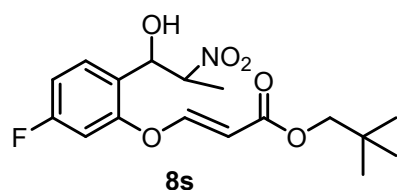

**8s** (911.3 mg, 86%), yellow solid, m.p. 83-85 °C.  $^1\text{H NMR}$  (400 MHz,  $\text{CDCl}_3$ )  $\delta$  7.71 (d,  $J = 12.0$  Hz, 1H), 7.62-7.58 (m, 1H), 7.00-6.95 (m, 1H), 6.80 (dd,  $J = 8.0, 2.4$  Hz, 1H), 5.72 (d,  $J = 12.0$  Hz, 1H), 5.64 (s, 1H), 4.75 (dq,  $J = 6.8, 2.8$  Hz, 1H), 3.85 (s, 2H), 2.99 (br s, 1H), 1.45 (d,  $J = 6.8$  Hz, 3H), 0.96 (s, 9H).  $^{13}\text{C NMR}$  (100 MHz,  $\text{CDCl}_3$ )  $\delta$  166.79, 163.39 (d,  $J = 248.8$  Hz, 1C), 156.72, 152.65 (d,  $J = 9.8$  Hz, 1C), 129.50 (d,  $J = 9.6$  Hz, 1C), 124.50 (d,  $J = 3.6$  Hz, 1C), 112.34 (d,  $J = 21.0$  Hz, 1C), 105.05 (d,  $J = 25.3$  Hz, 1C), 104.82, 85.06, 74.00, 68.60, 31.55, 26.61 (3C), 11.86. HRMS (ESI): Calcd for  $\text{C}_{17}\text{H}_{22}\text{FNNaO}_6$   $[\text{M}+\text{Na}]^+$ : 378.1323. Found: 378.1331.

neopentyl (*E*)-3-(3-chloro-6-(1-hydroxy-2-nitropropyl)phenoxy)acrylate (**8t**)

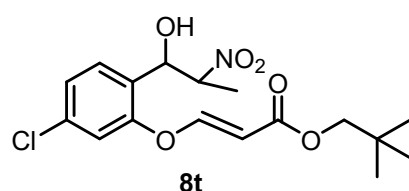

**8t** (973.4 mg, 88%), yellow solid, m.p. 141-143 °C.  $^1\text{H NMR}$  (400 MHz,  $\text{CDCl}_3$ )  $\delta$  7.72 (d,  $J = 12.0$  Hz, 1H), 7.57 (d,  $J = 8.0$  Hz, 1H), 7.25-7.23 (m, 1H), 7.07 (d,  $J = 2.8$  Hz, 1H), 5.71 (d,  $J = 12.0$  Hz, 1H), 5.65 (d,  $J = 1.6$  Hz, 1H), 4.75 (dq,  $J = 6.8, 2.8$  Hz, 1H), 3.86 (s, 2H), 2.99 (br s, 1H), 1.44 (d,  $J = 6.8$  Hz, 3H), 0.97 (s, 9H).  $^{13}\text{C NMR}$  (100 MHz,  $\text{CDCl}_3$ )  $\delta$  166.83, 156.83, 152.30, 135.50, 129.23, 127.30, 125.71, 117.54, 104.81, 84.87, 74.03, 68.56, 31.55, 26.61 (3C), 11.79. HRMS (ESI): Calcd for  $\text{C}_{17}\text{H}_{22}\text{ClNNaO}_6$   $[\text{M}+\text{Na}]^+$ : 394.1028. Found: 394.1046 ( $[\text{M}+\text{Na}]^+$ ), 396.1024 ( $[\text{M}+2+\text{Na}]^+$ ).

neopentyl (*E*)-3-(2-(1-hydroxy-2-nitropropyl)-5-methylphenoxy)acrylate (**8u**)

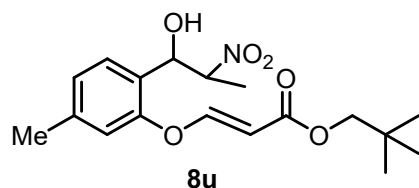

**8u** (996.2 mg, 95%), colorless oil.  $^1\text{H NMR}$  (400 MHz,  $\text{CDCl}_3$ )  $\delta$  7.77 (d,  $J = 12.0$  Hz, 1H), 7.47 (d,  $J = 8.0$  Hz, 1H), 7.06 (d,  $J = 8.0$  Hz, 1H), 6.86 (s, 1H), 5.65 (d,  $J = 12.0$  Hz, 1H), 5.62-5.61 (m, 1H), 4.77 (dq,  $J = 6.8, 3.2$  Hz, 1H), 3.85 (s, 2H), 2.79 (br s, 1H), 2.37 (s, 3H), 1.46 (d,  $J = 6.8$  Hz, 3H), 0.97 (s, 9H).  $^{13}\text{C NMR}$  (100 MHz,  $\text{CDCl}_3$ )  $\delta$  167.20, 157.98, 152.04, 140.69, 127.88, 126.29, 125.57, 117.94, 103.55, 85.31, 73.82, 69.09, 31.56, 26.64 (3C), 21.36, 12.06. HRMS (ESI): Calcd for  $\text{C}_{18}\text{H}_{25}\text{NNaO}_6$   $[\text{M}+\text{Na}]^+$ : 374.1574. Found: 374.1584.

neopentyl (*E*)-3-(2-fluoro-6-(1-hydroxy-2-nitropropyl)phenoxy)acrylate (**8v**)

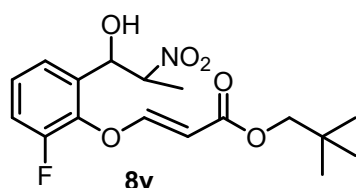

**8v** (921.1 mg, 87%), yellow solid, m.p. 90-92 °C.  $^1\text{H NMR}$  (400 MHz,  $\text{CDCl}_3$ )  $\delta$  7.71 (dd,  $J = 12.0, 1.6$  Hz, 1H), 7.42 (d,  $J = 8.0$  Hz, 1H), 7.30-7.27 (m, 1H), 7.27-7.16 (m, 1H), 5.60 (d,  $J = 1.2$  Hz, 1H), 5.37 (d,  $J = 12.0$  Hz, 1H), 4.74 (dq,  $J = 6.8, 2.8$  Hz, 1H), 3.81 (s, 2H), 3.15 (br s, 1H), 1.44 (d,  $J = 6.8$  Hz, 3H), 0.94 (s, 9H).  $^{13}\text{C NMR}$  (100 MHz,  $\text{CDCl}_3$ )  $\delta$  166.88, 159.59 (d,  $J = 2.6$  Hz, 1C), 153.71 (d,  $J = 249.9$  Hz, 1C), 138.67 (d,  $J = 12.5$  Hz, 1C), 133.02, 127.08 (d,  $J = 7.4$  Hz, 1C), 123.17 (d,  $J = 3.5$  Hz, 1C), 117.37 (d,  $J = 18.1$  Hz, 1C), 101.77, 85.02, 73.92, 68.72 (d,  $J = 2.9$  Hz, 1C), 31.51, 26.60 (3C), 11.74. HRMS (ESI): Calcd for  $\text{C}_{17}\text{H}_{22}\text{FNNaO}_6$   $[\text{M}+\text{Na}]^+$ : 378.1323. Found: 378.1338.

neopentyl (*E*)-3-(2-chloro-6-(1-hydroxy-2-nitropropyl)phenoxy)acrylate (**8w**)

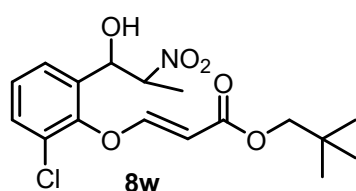

**8w** (988.4 mg, 89%), white solid, m.p. 163-165 °C.  $^1\text{H NMR}$  (400 MHz,  $\text{CDCl}_3$ )  $\delta$  7.67 (dd,  $J = 12.0, 1.6$  Hz, 1H), 7.58 (d,  $J = 8.0$  Hz, 1H), 7.45 (d,  $J = 8.0$  Hz, 1H), 7.31-7.27 (m, 1H), 5.57 (s, 1H), 5.23 (dd,  $J = 12.0, 1.6$  Hz, 1H), 4.79-4.74 (m, 1H), 3.81 (s, 2H), 3.10 (br s, 1H), 1.42 (d,  $J = 6.8$  Hz, 3H), 0.94 (s, 9H).  $^{13}\text{C NMR}$  (100 MHz,  $\text{CDCl}_3$ )  $\delta$  166.87, 159.12, 146.80, 133.18, 131.09, 127.51, 127.01, 126.62, 101.48, 84.89, 73.91, 68.93, 31.52, 26.62 (3C), 11.57. HRMS (ESI): Calcd for  $\text{C}_{17}\text{H}_{22}\text{ClNNaO}_6$   $[\text{M}+\text{Na}]^+$ : 394.1028. Found: 394.1031 ( $[\text{M}+\text{Na}]^+$ ), 396.1014 ( $[\text{M}+2+\text{Na}]^+$ ).

neopentyl (*E*)-3-(2-(1-hydroxy-2-nitropropyl)-6-methylphenoxy)acrylate (**8x**)

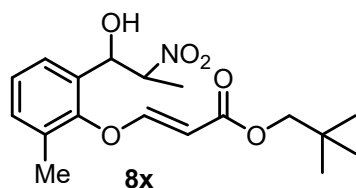

**8x** (983.3 mg, 93%), colorless oil. <sup>1</sup>H NMR (400 MHz, CDCl<sub>3</sub>) δ 7.73 (d, *J* = 12.0 Hz, 1H), 7.50-7.48 (m, 1H), 7.27-7.26 (m, 1H), 7.25-7.24 (m, 1H), 5.53 (s, 1H), 5.11 (d, *J* = 12.0 Hz, 1H), 4.78 (dq, *J* = 6.8, 2.4 Hz, 1H), 3.81 (s, 2H), 2.82 (br s, 1H), 2.22 (s, 3H), 1.44 (d, *J* = 6.8 Hz, 3H), 0.94 (s, 9H). <sup>13</sup>C NMR (100 MHz, CDCl<sub>3</sub>) δ 167.15, 159.78, 148.96, 132.08, 130.68, 130.52, 126.75, 125.68, 100.32, 85.24, 73.78, 69.03, 31.52, 26.63 (3C), 16.19, 11.67. HRMS (ESI): Calcd for C<sub>18</sub>H<sub>25</sub>NNaO<sub>6</sub> [M+Na]<sup>+</sup>: 374.1574. Found: 374.1582.

### General Procedure for the synthesis of **1**

To a solution of compound **8** (2 mmol, 1 equiv.) in 20 mL of CH<sub>2</sub>Cl<sub>2</sub> at 0 °C was added 1 g (2.4 mmol, 1.2 equiv.) of Dess-Martin periodinane. The resulting mixture was stirred at room temperature for 2 h. The reaction mixture was purified by silica gel chromatography (CH<sub>2</sub>Cl<sub>2</sub>:HOAc, 100:0.5) to afford desired products **1** (81-95%).

### 2-methoxyethyl (*E*)-3-(2-(2-nitropropanoyl)phenoxy)acrylate (**1c**)

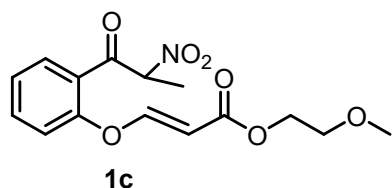

**1c** (553.1 mg, 86%), colorless oil. <sup>1</sup>H NMR (400 MHz, CDCl<sub>3</sub>) δ 7.88 (dd, *J* = 8.0, 1.6 Hz, 1H), 7.77 (d, *J* = 12.0 Hz, 1H), 7.66-7.61 (m, 1H), 7.34-7.30 (m, 1H), 7.14 (d, *J* = 8.0 Hz, 1H), 5.97 (q, *J* = 6.8 Hz, 1H), 5.81 (d, *J* = 12.0 Hz, 1H), 4.32 (t, *J* = 4.4 Hz, 2H), 3.63 (t, *J* = 4.4 Hz, 2H), 3.40 (s, 3H), 1.80 (d, *J* = 8.0 Hz, 3H). <sup>13</sup>C NMR (100 MHz, CDCl<sub>3</sub>) δ 189.52, 166.29, 156.66, 154.52, 135.72, 131.99, 125.91, 125.70, 117.82, 105.39, 88.26, 70.56, 63.70, 59.12, 15.69. HRMS (ESI): Calcd for C<sub>15</sub>H<sub>17</sub>NNaO<sub>7</sub> [M+Na]<sup>+</sup>: 346.0897. Found: 346.0903.

### octyl (*E*)-3-(2-(2-nitropropanoyl)phenoxy)acrylate (**1d**)

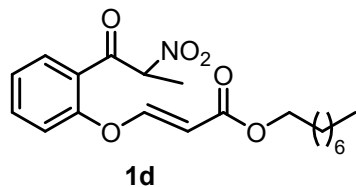

**1d** (628.6 mg, 84%), colorless oil. <sup>1</sup>H NMR (400 MHz, CDCl<sub>3</sub>) δ 7.89 (dd, *J* = 8.0, 1.6 Hz, 1H), 7.76 (d, *J* = 12.0 Hz, 1H), 7.66-7.62 (m, 1H), 7.34-7.30 (m, 1H), 7.14 (d, *J* = 8.0 Hz, 1H), 5.98 (q, *J* = 6.8 Hz, 1H), 5.78 (d, *J* = 12.0 Hz, 1H), 4.15 (t, *J* = 6.8 Hz, 2H), 1.80 (d, *J* = 6.8 Hz, 3H), 1.68-1.63 (m, 2H), 1.34-1.27 (m, 10H), 0.87 (t, *J* = 6.8 Hz, 3H). <sup>13</sup>C NMR (100 MHz, CDCl<sub>3</sub>) δ 189.53, 166.38, 156.08, 154.65, 135.73, 132.02, 125.83, 125.59, 117.63, 105.92, 88.31, 64.96, 31.91, 29.34, 29.30, 28.77, 26.06, 22.76, 15.70, 14.21. HRMS (ESI): Calcd for C<sub>20</sub>H<sub>27</sub>NNaO<sub>6</sub> [M+Na]<sup>+</sup>: 400.1736. Found: 400.1741.



isopropyl (*E*)-3-(2-(2-nitropropanoyl)phenoxy)acrylate (**1e**)

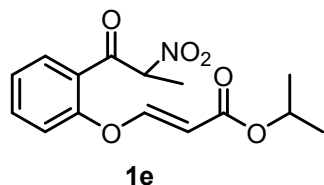

**1e** (525.2 mg, 86%), colorless oil.  $^1\text{H NMR}$  (400 MHz,  $\text{CDCl}_3$ )  $\delta$  7.89 (dd,  $J = 8.0, 1.6$  Hz, 1H), 7.72 (d,  $J = 12.0$  Hz, 1H), 7.66-7.62 (m, 1H), 7.34-7.30 (m, 1H), 7.15 (d,  $J = 8.0$  Hz, 1H), 5.98 (q,  $J = 6.8$  Hz, 1H), 5.75 (d,  $J = 12.0$  Hz, 1H), 5.10 (hept,  $J = 6.4$  Hz, 1H), 1.80 (d,  $J = 6.8$  Hz, 3H), 1.28 (d,  $J = 6.4$  Hz, 6H).  $^{13}\text{C NMR}$  (100 MHz,  $\text{CDCl}_3$ )  $\delta$  189.58, 165.84, 155.91, 154.68, 135.76, 132.04, 125.79, 125.57, 117.64, 106.39, 88.34, 68.21, 22.03 (2C), 15.71. HRMS (ESI): Calcd for  $\text{C}_{15}\text{H}_{17}\text{NNaO}_6$   $[\text{M}+\text{Na}]^+$ : 330.0948. Found: 330.0953.

isobutyl (*E*)-3-(2-(2-nitropropanoyl)phenoxy)acrylate (**1f**)

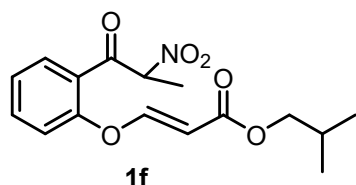

**1f** (597.7 mg, 93%), colorless oil.  $^1\text{H NMR}$  (400 MHz,  $\text{CDCl}_3$ )  $\delta$  7.89 (dd,  $J = 8.0, 1.6$  Hz, 1H), 7.74 (d,  $J = 12.0$  Hz, 1H), 7.67-7.62 (m, 1H), 7.34-7.30 (m, 1H), 7.14 (d,  $J = 8.0$  Hz, 1H), 5.99 (q,  $J = 6.8$  Hz, 1H), 5.78 (d,  $J = 12.0$  Hz, 1H), 3.95 (d,  $J = 6.8$  Hz, 2H), 1.97 (hept,  $J = 6.8$  Hz, 1H), 1.80 (d,  $J = 6.8$  Hz, 3H), 0.95 (d,  $J = 6.4$  Hz, 6H).  $^{13}\text{C NMR}$  (100 MHz,  $\text{CDCl}_3$ )  $\delta$  189.53, 166.38, 156.07, 154.64, 135.76, 132.03, 125.78, 125.60, 117.59, 105.87, 88.33, 70.84, 27.89, 19.24 (2C), 15.71. HRMS (ESI): Calcd for  $\text{C}_{16}\text{H}_{19}\text{NNaO}_6$   $[\text{M}+\text{Na}]^+$ : 344.1105. Found: 344.1106.

neopentyl (*E*)-3-(2-(2-nitropropanoyl)phenoxy)acrylate (**1g**)

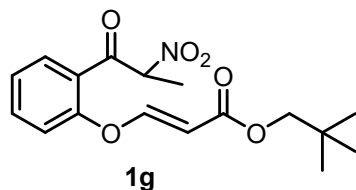

**1g** (627.9 mg, 94%), colorless oil.  $^1\text{H NMR}$  (400 MHz,  $\text{CDCl}_3$ )  $\delta$  7.89 (d,  $J = 8.0$  Hz, 1H), 7.74 (d,  $J = 12.0$  Hz, 1H), 7.67-7.62 (m, 1H), 7.34-7.30 (m, 1H), 7.14 (d,  $J = 8.0$  Hz, 1H), 5.99 (q,  $J = 6.8$  Hz, 1H), 5.81 (d,  $J = 12.0$  Hz, 1H), 3.87 (s, 2H), 1.81 (d,  $J = 6.8$  Hz, 3H), 0.97 (s, 9H).  $^{13}\text{C NMR}$  (100 MHz,  $\text{CDCl}_3$ )  $\delta$  189.53, 166.44, 156.02, 154.65, 135.79, 132.04, 125.72, 125.59, 117.52, 105.89, 88.35, 74.01, 31.54, 26.60 (3C), 15.71. HRMS (ESI): Calcd for  $\text{C}_{17}\text{H}_{21}\text{NNaO}_6$   $[\text{M}+\text{Na}]^+$ : 358.1261. Found: 358.1278.

neopentyl (*E*)-3-(2-(2-nitrobutanoyl)phenoxy)acrylate (**1i**)

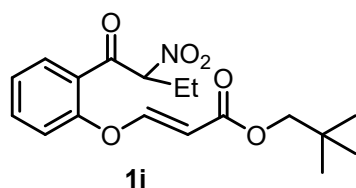

**1i** (664.2 mg, 95%), colorless oil.  $^1\text{H NMR}$  (400 MHz,  $\text{CDCl}_3$ )  $\delta$  7.87 (dd,  $J = 8.0, 1.2$  Hz, 1H), 7.75 (d,  $J = 12.0$  Hz, 1H), 7.66-7.62 (m, 1H), 7.34-7.30 (m, 1H), 7.14 (d,  $J = 8.0$  Hz, 1H), 5.88-5.85 (m, 1H), 5.81 (d,  $J = 12.0$  Hz, 1H), 3.88 (s, 2H), 2.33-2.27 (m, 1H), 2.20-2.15 (m, 1H), 1.08 (t,  $J = 7.2$  Hz, 3H), 0.97 (s, 9H).  $^{13}\text{C NMR}$  (100 MHz,  $\text{CDCl}_3$ )  $\delta$  189.08, 166.44, 156.15, 154.55, 135.67, 131.94, 126.09, 125.62, 117.64, 105.86, 94.99, 74.01, 31.56, 26.61 (3C), 23.98, 11.00. HRMS (ESI): Calcd for  $\text{C}_{18}\text{H}_{23}\text{NNaO}_6$   $[\text{M}+\text{Na}]^+$ : 372.1418. Found: 372.1427.

neopentyl (*E*)-3-(4-methyl-2-(2-nitropropanoyl)phenoxy)acrylate (**1j**)

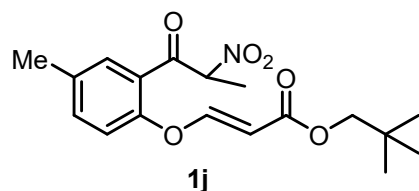

**1j** (629.2 mg, 90%), colorless oil.  $^1\text{H NMR}$  (400 MHz,  $\text{CDCl}_3$ )  $\delta$  7.72 (d,  $J = 12.0$  Hz, 1H), 7.68 (s, 1H), 7.43 (d,  $J = 8.0$  Hz, 1H), 7.03 (d,  $J = 8.0$  Hz, 1H), 5.99 (q,  $J = 6.8$  Hz, 1H), 5.76 (d,  $J = 12.0$  Hz, 1H), 3.86 (s, 2H), 2.38 (s, 3H), 1.79 (d,  $J = 6.8$  Hz, 3H), 0.96 (s, 9H).  $^{13}\text{C NMR}$  (100 MHz,  $\text{CDCl}_3$ )  $\delta$  189.76, 166.58, 156.59, 152.62, 136.40, 135.67, 132.07, 125.40, 117.66, 105.30, 88.35, 73.96, 31.55, 26.61 (3C), 20.69, 15.73. HRMS (ESI): Calcd for  $\text{C}_{18}\text{H}_{23}\text{NNaO}_6$   $[\text{M}+\text{Na}]^+$ : 372.1418. Found: 372.1429.

neopentyl (*E*)-3-(4-(tert-butyl)-2-(2-nitropropanoyl)phenoxy)acrylate (**1k**)

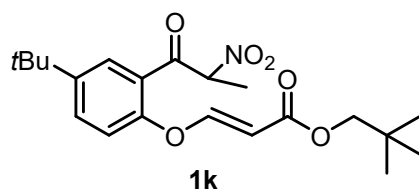

**1k** (689.0 mg, 88%), colorless oil.  $^1\text{H NMR}$  (400 MHz,  $\text{CDCl}_3$ )  $\delta$  7.90 (s, 1H), 7.73 (d,  $J = 12.0$  Hz, 1H), 7.65 (d,  $J = 8.0$  Hz, 1H), 7.06 (d,  $J = 8.0$  Hz, 1H), 5.99 (q,  $J = 6.8$  Hz, 1H), 5.78 (d,  $J = 12.0$  Hz, 1H), 3.87 (s, 2H), 1.81 (d,  $J = 6.8$  Hz, 3H), 1.33 (s, 9H), 0.97 (s, 9H).  $^{13}\text{C NMR}$  (100 MHz,  $\text{CDCl}_3$ )  $\delta$  189.75, 166.56, 156.47, 152.62, 148.94, 133.14, 128.72, 124.96, 117.37, 105.42, 88.42, 73.98, 34.83, 31.56, 31.30 (3C), 26.63 (3C), 15.78. HRMS (ESI): Calcd for  $\text{C}_{21}\text{H}_{29}\text{NNaO}_6$   $[\text{M}+\text{Na}]^+$ : 414.1887. Found: 414.1892.

neopentyl (*E*)-3-(4-methoxy-2-(2-nitropropanoyl)phenoxy)acrylate (**1l**)

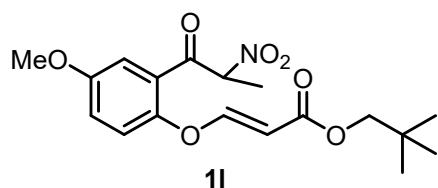

**1l** (663.9 mg, 91%), colorless oil. <sup>1</sup>H NMR (400 MHz, CDCl<sub>3</sub>) δ 7.68 (d, *J* = 12.0 Hz, 1H), 7.36 (d, *J* = 2.4 Hz, 1H), 7.18-7.16 (m, 1H), 7.06 (d, *J* = 8.0 Hz, 1H), 5.98 (q, *J* = 6.8 Hz, 1H), 5.71 (d, *J* = 12.0 Hz, 1H), 3.85 (s, 2H), 3.84 (s, 3H), 1.80 (d, *J* = 6.8 Hz, 3H), 0.96 (s, 9H). <sup>13</sup>C NMR (100 MHz, CDCl<sub>3</sub>) δ 189.29, 166.59, 157.25, 156.99, 148.54, 126.35, 122.53, 119.66, 114.67, 104.87, 88.20, 73.95, 56.07, 31.54, 26.61 (3C), 15.75. HRMS (ESI): Calcd for C<sub>18</sub>H<sub>23</sub>NNaO<sub>7</sub> [M+Na]<sup>+</sup>: 388.1367. Found: 388.1352.

neopentyl (*E*)-3-(4-fluoro-2-(2-nitropropanoyl)phenoxy)acrylate (**1m**)

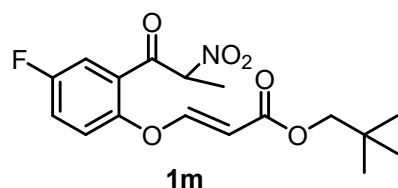

**1m** (593.5 mg, 84%), colorless oil. <sup>1</sup>H NMR (400 MHz, CDCl<sub>3</sub>) δ 7.68 (d, *J* = 12.0 Hz, 1H), 7.60 (d, *J* = 8.0 Hz, 1H), 7.37-7.33 (m, 1H), 7.13 (dd, *J* = 8.0, 3.6 Hz, 1H), 5.95 (q, *J* = 6.8 Hz, 1H), 5.79 (d, *J* = 12.0 Hz, 1H), 3.86 (s, 2H), 1.81 (d, *J* = 6.8 Hz, 3H), 0.96 (s, 9H). <sup>13</sup>C NMR (100 MHz, CDCl<sub>3</sub>) δ 188.11, 166.30, 159.47 (d, *J* = 246.1 Hz, 1C), 156.19, 150.75 (d, *J* = 2.6 Hz, 1C), 127.08 (d, *J* = 6.6 Hz, 1C), 122.65 (d, *J* = 23.8 Hz, 1C), 119.63 (d, *J* = 7.9 Hz, 1C), 118.20 (d, *J* = 24.9 Hz, 1C), 105.99, 87.93, 74.07, 31.54, 26.59 (3C), 15.69. HRMS (ESI): Calcd for C<sub>17</sub>H<sub>20</sub>FNNaO<sub>6</sub> [M+Na]<sup>+</sup>: 376.1167. Found: 376.1163.

neopentyl (*E*)-3-(4-chloro-2-(2-nitropropanoyl)phenoxy)acrylate (**1n**)

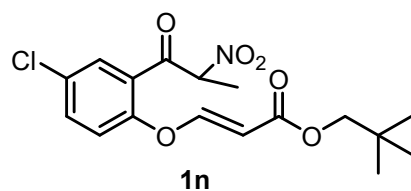

**1n** (626.7 mg, 85%), colorless oil. <sup>1</sup>H NMR (400 MHz, CDCl<sub>3</sub>) δ 7.86 (d, *J* = 2.4 Hz, 1H), 7.68 (d, *J* = 12.0 Hz, 1H), 7.59 (dd, *J* = 8.0, 2.4 Hz, 1H), 7.10 (d, *J* = 8.0 Hz, 1H), 5.93 (q, *J* = 6.8 Hz, 1H), 5.82 (d, *J* = 12.0 Hz, 1H), 3.87 (s, 2H), 1.81 (d, *J* = 6.8 Hz, 3H), 0.96 (s, 9H). <sup>13</sup>C NMR (100 MHz, CDCl<sub>3</sub>) δ 188.18, 166.23, 155.53, 153.06, 135.43, 131.63, 131.34, 126.87, 118.95, 106.53, 88.02, 74.14, 31.55, 26.60 (3C), 15.70. HRMS (ESI): Calcd for C<sub>17</sub>H<sub>20</sub>ClNNaO<sub>6</sub> [M+Na]<sup>+</sup>: 392.0871. Found: 392.0887 ([M+Na]<sup>+</sup>), 394.0931 ([M+2+Na]<sup>+</sup>).

neopentyl (*E*)-3-(4-bromo-2-(2-nitropropanoyl)phenoxy)acrylate (**1o**)

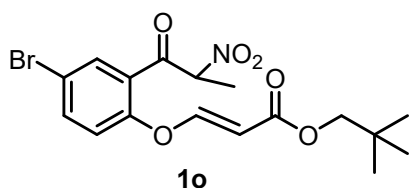

**1o** (700.2 mg, 85%), colorless oil. <sup>1</sup>H NMR (400 MHz, CDCl<sub>3</sub>) δ 8.00 (d, *J* = 2.4 Hz, 1H), 7.73 (dd, *J* = 8.0, 2.4 Hz, 1H), 7.68 (d, *J* = 12.0 Hz, 1H), 7.04 (d, *J* = 8.0 Hz, 1H), 5.93 (q, *J* = 6.8 Hz, 1H), 5.83 (d, *J* = 12.0 Hz, 1H), 3.87 (s, 2H), 1.81 (d, *J* = 6.8 Hz, 3H), 0.96 (s, 9H). <sup>13</sup>C NMR (100 MHz, CDCl<sub>3</sub>) δ 188.11, 166.20, 155.38, 153.59, 138.37, 134.60, 127.15, 119.18, 118.58, 106.64, 88.02, 74.15, 31.56, 26.61 (3C), 15.71. HRMS (ESI): Calcd for C<sub>17</sub>H<sub>20</sub>BrNNaO<sub>6</sub> [M+Na]<sup>+</sup>: 436.0366. Found: 436.0362 ([M+Na]<sup>+</sup>), 438.0370 ([M+2+Na]<sup>+</sup>).

neopentyl (*E*)-3-(3-fluoro-2-(2-nitropropanoyl)phenoxy)acrylate (**1p**)

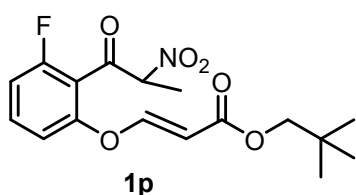

**1p** (577.2 mg, 82%), colorless oil. <sup>1</sup>H NMR (400 MHz, CDCl<sub>3</sub>) δ 7.70 (d, *J* = 12.0 Hz, 1H), 7.56-7.50 (m, 1H), 7.05-7.01 (m, 1H), 6.96 (d, *J* = 8.0 Hz, 1H), 5.76 (q, *J* = 6.8 Hz, 1H), 5.75 (d, *J* = 12.0 Hz, 1H), 3.85 (s, 2H), 1.80 (d, *J* = 6.8 Hz, 3H), 0.96 (s, 9H). <sup>13</sup>C NMR (100 MHz, CDCl<sub>3</sub>) δ 188.14, 166.49, 160.27 (d, *J* = 253.3 Hz, 1C), 156.37, 154.12 (d, *J* = 6.1 Hz, 1C), 134.20 (d, *J* = 10.3 Hz, 1C), 116.73 (d, *J* = 18.3 Hz, 1C), 113.26 (d, *J* = 3.5 Hz, 1C), 112.92 (d, *J* = 21.6 Hz, 1C), 105.66, 89.31, 73.98, 31.54, 26.60 (3C), 15.03. HRMS (ESI): Calcd for C<sub>17</sub>H<sub>20</sub>FNNaO<sub>6</sub> [M+Na]<sup>+</sup>: 376.1167. Found: 376.1147.

neopentyl (*E*)-3-(3-chloro-2-(2-nitropropanoyl)phenoxy)acrylate (**1q**)

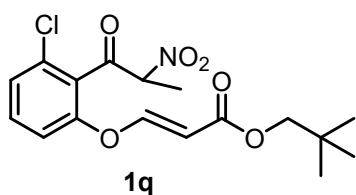

**1q** (598.9 mg, 81%), colorless oil. <sup>1</sup>H NMR (400 MHz, CDCl<sub>3</sub>) δ 7.69 (d, *J* = 12.0 Hz, 1H), 7.48-7.44 (m, 1H), 7.29 (d, *J* = 8.0 Hz, 1H), 7.07 (d, *J* = 8.0 Hz, 1H), 5.76 (q, *J* = 6.8 Hz, 1H), 5.75 (d, *J* = 12.0 Hz, 1H), 3.85 (s, 2H), 1.81 (d, *J* = 6.8 Hz, 3H), 0.96 (s, 9H). <sup>13</sup>C NMR (100 MHz, CDCl<sub>3</sub>) δ 190.94, 166.51, 156.10, 153.47, 132.91, 132.27, 127.45, 126.53, 115.33, 105.76, 89.51, 74.02, 31.54, 26.60 (3C), 14.85. HRMS (ESI): Calcd for C<sub>17</sub>H<sub>20</sub>ClNNaO<sub>6</sub> [M+Na]<sup>+</sup>: 392.0871. Found: 392.0876 ([M+Na]<sup>+</sup>), 394.0929 ([M+2+Na]<sup>+</sup>).

neopentyl (*E*)-3-(3-methyl-2-(2-nitropropanoyl)phenoxy)acrylate (**1r**)

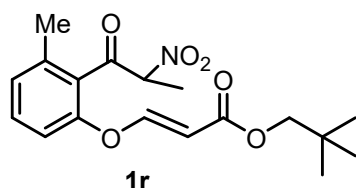

**1r** (641.3 mg, 92%), colorless oil. <sup>1</sup>H NMR (400 MHz, CDCl<sub>3</sub>) δ 7.73 (d, *J* = 12.0 Hz, 1H), 7.42-7.38 (m, 1H), 7.10 (d, *J* = 8.0 Hz, 1H), 6.95 (d, *J* = 8.0 Hz, 1H), 5.76 (q, *J* = 6.8 Hz, 1H), 5.73 (d, *J* = 12.0 Hz, 1H), 3.86 (s, 2H), 2.33 (s, 3H), 1.78 (d, *J* = 6.8 Hz, 3H), 0.96 (s, 9H). <sup>13</sup>C NMR (100 MHz, CDCl<sub>3</sub>) δ 194.02, 166.67, 156.74, 153.20, 139.58, 132.48, 127.79, 127.48, 114.23, 105.00, 89.49, 73.93, 31.56, 26.62 (3C), 19.51, 15.06. HRMS (ESI): Calcd for C<sub>18</sub>H<sub>23</sub>NNaO<sub>6</sub> [M+Na]<sup>+</sup>: 372.1418. Found: 372.1430.

neopentyl (*E*)-3-(5-fluoro-2-(2-nitropropanoyl)phenoxy)acrylate (**1s**)

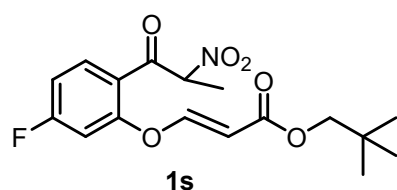

**1s** (599.1 mg, 85%), colorless oil. <sup>1</sup>H NMR (400 MHz, CDCl<sub>3</sub>) δ 8.01-7.98 (m, 1H), 7.69 (d, *J* = 12.0 Hz, 1H), 7.05-7.01 (m, 1H), 6.87 (d, *J* = 8.0 Hz, 1H), 5.95 (q, *J* = 6.8 Hz, 1H), 5.88 (d, *J* = 12.0 Hz, 1H), 3.88 (s, 2H), 1.81 (d, *J* = 6.8 Hz, 3H), 0.97 (s, 9H). <sup>13</sup>C NMR (100 MHz, CDCl<sub>3</sub>) δ 187.81, 166.87 (d, *J* = 258.3 Hz, 1C), 166.07, 156.23 (d, *J* = 10.6 Hz, 1C), 154.79, 134.59 (d, *J* = 10.8 Hz, 1C), 121.96 (d, *J* = 3.5 Hz, 1C), 113.05 (d, *J* = 21.5 Hz, 1C), 107.23, 105.16 (d, *J* = 25.6 Hz, 1C), 88.11, 74.20, 31.56, 26.61 (3C), 15.76. HRMS (ESI): Calcd for C<sub>17</sub>H<sub>20</sub>FNNaO<sub>6</sub> [M+Na]<sup>+</sup>: 376.1167. Found: 376.1175.

neopentyl (*E*)-3-(5-chloro-2-(2-nitropropanoyl)phenoxy)acrylate (**1t**)

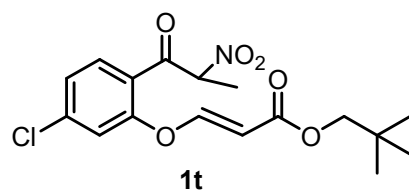

**1t** (643.2 mg, 87%), colorless oil. <sup>1</sup>H NMR (400 MHz, CDCl<sub>3</sub>) δ 7.88 (d, *J* = 8.0 Hz, 1H), 7.69 (d, *J* = 12.0 Hz, 1H), 7.30 (d, *J* = 8.0 Hz, 1H), 7.15 (s, 1H), 5.95 (q, *J* = 6.8 Hz, 1H), 5.87 (d, *J* = 12.0 Hz, 1H), 3.89 (s, 2H), 1.81 (d, *J* = 6.8 Hz, 3H), 0.98 (s, 9H). <sup>13</sup>C NMR (100 MHz, CDCl<sub>3</sub>) δ 188.17, 166.15, 155.04, 155.00, 141.95, 133.22, 125.99, 124.00, 117.84, 107.10, 88.12, 74.21, 31.56, 26.61 (3C), 15.72. HRMS (ESI): Calcd for C<sub>17</sub>H<sub>20</sub>ClNNaO<sub>6</sub> [M+Na]<sup>+</sup>: 392.0871. Found: 392.0894 ([M+Na]<sup>+</sup>), 394.0927 ([M+2+Na]<sup>+</sup>).

neopentyl (*E*)-3-(5-methyl-2-(2-nitropropanoyl)phenoxy)acrylate (**1u**)

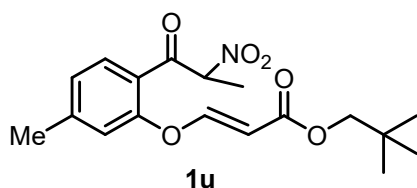

**1u** (649.3 mg, 93%), colorless oil. <sup>1</sup>H NMR (400 MHz, CDCl<sub>3</sub>) δ 7.82 (d, *J* = 8.0 Hz, 1H), 7.74 (d, *J* = 12.0 Hz, 1H), 7.12 (d, *J* = 8.0 Hz, 1H), 6.93 (s, 1H), 5.98 (q, *J* = 6.8 Hz, 1H), 5.81 (d, *J* = 12.0 Hz, 1H), 3.87 (s, 2H), 2.44 (s, 3H), 1.79 (d, *J* = 6.8 Hz, 3H), 0.97 (s, 9H). <sup>13</sup>C NMR (100 MHz, CDCl<sub>3</sub>) δ 188.90, 166.61, 156.18, 154.85, 147.79, 132.07, 126.53, 122.90, 118.10, 105.70, 88.32, 74.02, 31.56, 26.61 (3C), 21.91, 15.77. HRMS (ESI): Calcd for C<sub>18</sub>H<sub>23</sub>NNaO<sub>6</sub> [M+Na]<sup>+</sup>: 372.1418. Found: 372.1428.

neopentyl (*E*)-3-(6-fluoro-2-(2-nitropropanoyl)phenoxy)acrylate (**1v**)

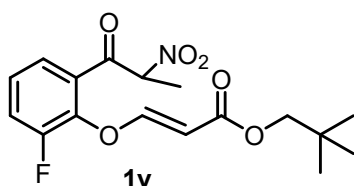

**1v** (606.1 mg, 86%), colorless oil. <sup>1</sup>H NMR (400 MHz, CDCl<sub>3</sub>) δ 7.68 (d, *J* = 12.0 Hz, 1H), 7.64 (d, *J* = 8.0 Hz, 1H), 7.48-7.44 (m, 1H), 7.38-7.32 (m, 1H), 5.89 (q, *J* = 6.8 Hz, 1H), 5.53 (d, *J* = 12.0 Hz, 1H), 3.84 (s, 2H), 1.80 (d, *J* = 6.8 Hz, 3H), 0.95 (s, 9H). <sup>13</sup>C NMR (100 MHz, CDCl<sub>3</sub>) δ 188.71, 166.21, 158.88 (d, *J* = 3.6 Hz, 1C), 154.05 (d, *J* = 251.8 Hz, 1C), 141.67 (d, *J* = 12.8 Hz, 1C), 129.55, 127.15 (d, *J* = 7.4 Hz, 1C), 126.45 (d, *J* = 3.5 Hz, 1C), 122.71 (d, *J* = 18.6 Hz, 1C), 103.52, 87.78, 73.98, 31.53, 26.60 (3C), 15.66. HRMS (ESI): Calcd for C<sub>17</sub>H<sub>20</sub>FNNaO<sub>6</sub> [M+Na]<sup>+</sup>: 376.1167. Found: 376.1149.

neopentyl (*E*)-3-(6-chloro-2-(2-nitropropanoyl)phenoxy)acrylate (**1w**)

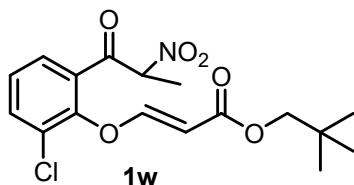

**1w** (633.2 mg, 86%), colorless oil. <sup>1</sup>H NMR (400 MHz, CDCl<sub>3</sub>) δ 7.71 (dd, *J* = 8.0, 1.6 Hz, 1H), 7.70 (d, *J* = 1.6 Hz, 1H), 7.63 (d, *J* = 12.0 Hz, 1H), 7.39-7.35 (m, 1H), 5.89 (q, *J* = 6.8 Hz, 1H), 5.35 (d, *J* = 12.0 Hz, 1H), 3.83 (s, 2H), 1.79 (d, *J* = 6.8 Hz, 3H), 0.94 (s, 9H). <sup>13</sup>C NMR (100 MHz, CDCl<sub>3</sub>) δ 189.39, 166.32, 159.01, 149.28, 136.17, 130.39, 129.54, 128.28, 127.65, 103.01, 87.60, 73.97, 31.53, 26.61 (3C), 15.73. HRMS (ESI): Calcd for C<sub>17</sub>H<sub>20</sub>ClNNaO<sub>6</sub> [M+Na]<sup>+</sup>: 392.0871. Found: 392.0883 ([M+Na]<sup>+</sup>), 394.0907 ([M+2+Na]<sup>+</sup>).

### General Procedure for the synthesis of **2**

Catalyst **CAT-6** (0.05 mmol, 0.1 equiv.) was added to a solution of compound **1** (0.5 mmol, 1 equiv.) in dry toluene (5 mL) at -30 °C. After 12 h of stirring, the reaction mixture was quenched with 1 N HCl solution, extracted with EtOAc (3 × 20 mL). The combined organic extracts were washed with brine (20 mL), dried over Na<sub>2</sub>SO<sub>4</sub>, filtered and concentrated in

vacuo to give a residue. The residue was purified by silica gel chromatography (petroleum ether:EtOAc, 20:1-10:3) to afford desired products **2** (90-99%).

ethyl 2-((2*S*,3*S*)-3-methyl-3-nitro-4-oxochroman-2-yl)acetate (**2a**)

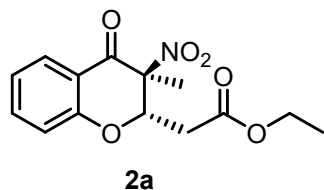

**2a** (143.1 mg, 98%), > 20:1 d.r., 97% ee, white solid, m.p. 63-65 °C. Optical rotation [ $\alpha$ ]<sub>D</sub>

= -33.4 (*c* 1.0, CHCl<sub>3</sub>). **<sup>1</sup>H NMR** (400 MHz, CDCl<sub>3</sub>)  $\delta$  7.93 (dd, *J* = 8.0, 1.2 Hz, 1H), 7.60-7.55 (m, 1H), 7.16-7.12 (m, 1H), 7.02 (d, *J* = 8.0 Hz, 1H), 5.60 (dd, *J* = 10.0, 2.4 Hz, 1H), 4.22 (q, *J* = 7.2 Hz, 2H), 2.85 (dd, *J* = 16.0, 10.0 Hz, 1H), 2.45 (dd, *J* = 16.0, 2.4 Hz, 1H), 1.74 (s, 3H), 1.28 (t, *J* = 7.2 Hz, 3H). **<sup>13</sup>C NMR** (100 MHz, CDCl<sub>3</sub>)  $\delta$  185.06, 168.52, 159.80, 137.65, 128.60, 123.28, 118.36, 118.27, 92.28, 78.13, 61.66, 34.65, 14.47, 14.25. HRMS (ESI): Calcd for C<sub>14</sub>H<sub>15</sub>NNaO<sub>6</sub> [M+Na]<sup>+</sup>: 316.0792. Found: 316.0800.

butyl 2-((2*S*,3*S*)-3-methyl-3-nitro-4-oxochroman-2-yl)acetate (**2b**)

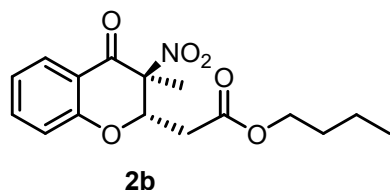

**2b**

**2b** (158.8 mg, 99%), > 20:1 d.r., 96% ee, colorless oil. Optical rotation [ $\alpha$ ] = -37.1 (*c* 1.0, CHCl<sub>3</sub>). **<sup>1</sup>H NMR** (400 MHz, CDCl<sub>3</sub>)  $\delta$  7.96 (d, *J* = 8.0 Hz, 1H), 7.61-7.57 (m, 1H), 7.17-7.13 (m, 1H), 7.03 (d, *J* = 8.0 Hz, 1H), 5.61 (d, *J* = 10.0 Hz, 1H), 4.21-4.15 (m, 2H), 2.86 (dd, *J* = 16.0, 10.0 Hz, 1H), 2.45 (d, *J* = 16.0 Hz, 1H), 1.76 (s, 3H), 1.68-1.61 (m, 2H), 1.42-1.36 (m, 2H), 0.94 (t, *J* = 7.6 Hz, 3H). **<sup>13</sup>C NMR** (100 MHz, CDCl<sub>3</sub>)  $\delta$  185.07, 168.60, 159.79, 137.64, 128.61, 123.29, 118.36, 118.25, 92.29, 78.16, 65.51, 34.67, 30.64, 19.17, 14.47, 13.77. HRMS (ESI): Calcd for C<sub>16</sub>H<sub>19</sub>NNaO<sub>6</sub> [M+Na]<sup>+</sup>: 344.1105. Found: 344.1128.

2-methoxyethyl 2-((2*S*,3*S*)-3-methyl-3-nitro-4-oxochroman-2-yl)acetate (**2c**)

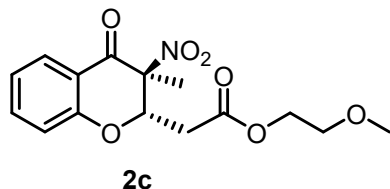

**2c**

**2c** (158.0 mg, 98%), > 20:1 d.r., 95% ee, colorless oil. Optical rotation [ $\alpha$ ] = -65.5 (*c* 1.0, CHCl<sub>3</sub>). **<sup>1</sup>H NMR** (400 MHz, CDCl<sub>3</sub>)  $\delta$  7.94 (dd, *J* = 8.0, 1.2 Hz, 1H), 7.61-7.56 (m, 1H), 7.16-7.13 (m, 1H), 7.03 (d, *J* = 8.0 Hz, 1H), 5.61 (dd, *J* = 10.0, 2.0 Hz, 1H), 4.33-4.31 (m, 2H), 3.61 (t, *J* = 4.4 Hz, 2H), 3.38 (s, 3H), 2.93 (dd, *J* = 16.0, 10.0 Hz, 1H), 2.48 (dd, *J* = 16.0,

2.0 Hz, 1H), 1.74 (s, 3H).  $^{13}\text{C}$  NMR (100 MHz,  $\text{CDCl}_3$ )  $\delta$  185.04, 168.60, 159.76, 137.65, 128.58, 123.29, 118.29 (2C), 92.23, 77.94, 70.27, 64.56, 59.14, 34.45, 14.47. HRMS (ESI): Calcd for  $\text{C}_{15}\text{H}_{17}\text{NNaO}_7$   $[\text{M}+\text{Na}]^+$ : 346.0897. Found: 346.0914.

octyl 2-((2*S*,3*S*)-3-methyl-3-nitro-4-oxochroman-2-yl)acetate (**2d**)

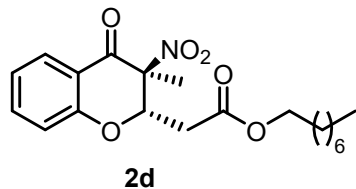

**10**

**2d** (182.1 mg, 97%), > 20:1 d.r., 88% ee, colorless oil. Optical rotation  $[\alpha]_D^{25} = -46.0$  ( $c$  1.0,  $\text{CHCl}_3$ ).  $^1\text{H}$  NMR (400 MHz,  $\text{CDCl}_3$ )  $\delta$  7.96 (d,  $J = 8.0$  Hz, 1H), 7.61-7.57 (m, 1H), 7.17-7.13 (m, 1H), 7.03 (d,  $J = 8.0$  Hz, 1H), 5.60 (dd,  $J = 10.0, 2.0$  Hz, 1H), 4.20-4.13 (m, 2H), 2.86 (dd,  $J = 16.0, 10.0$  Hz, 1H), 2.45 (dd,  $J = 16.0, 2.0$  Hz, 1H), 1.75 (s, 3H), 1.68-1.61 (m, 2H), 1.33-1.26 (m, 10H), 0.88 (d,  $J = 6.8$  Hz, 3H).  $^{13}\text{C}$  NMR (100 MHz,  $\text{CDCl}_3$ )  $\delta$  185.09, 168.60, 159.80, 137.64, 128.64, 123.30, 118.37, 118.27, 92.29, 78.16, 65.86, 34.68, 31.89, 29.30 (2C), 28.64, 25.98, 22.77, 14.48, 14.22. HRMS (ESI): Calcd for  $\text{C}_{20}\text{H}_{27}\text{NNaO}_6$   $[\text{M}+\text{Na}]^+$ : 400.1736. Found: 400.1752.

isopropyl 2-((2*S*,3*S*)-3-methyl-3-nitro-4-oxochroman-2-yl)acetate (**2e**)

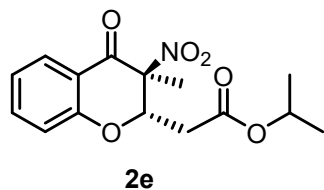

**2e** (151.8 mg, 99%), > 20:1 d.r., 95% ee, white solid, m.p. 56-57 °C. Optical rotation  $[\alpha]_D^{25} = -65.6$  ( $c$  1.0,  $\text{CHCl}_3$ ).  $^1\text{H}$  NMR (400 MHz,  $\text{CDCl}_3$ )  $\delta$  7.95 (dd,  $J = 8.0, 1.6$  Hz, 1H), 7.60-7.56 (m, 1H), 7.16-7.13 (m, 1H), 7.02 (d,  $J = 8.0$  Hz, 1H), 5.59 (dd,  $J = 10.0, 2.0$  Hz, 1H), 5.10 (hept,  $J = 6.8$  Hz, 1H), 2.82 (dd,  $J = 16.0, 10.0$  Hz, 1H), 2.43 (dd,  $J = 16.0, 2.0$  Hz, 1H), 1.75 (s, 3H), 1.28 (d,  $J = 6.8$  Hz, 3H), 1.25 (d,  $J = 6.8$  Hz, 3H).  $^{13}\text{C}$  NMR (100 MHz,  $\text{CDCl}_3$ )  $\delta$  185.10, 168.01, 159.82, 137.65, 128.61, 123.27, 118.39, 118.22, 92.28, 78.26, 69.34, 34.92, 21.89, 21.83, 14.49. HRMS (ESI): Calcd for  $\text{C}_{15}\text{H}_{17}\text{NNaO}_6$   $[\text{M}+\text{Na}]^+$ : 330.0948. Found: 330.0964.

isobutyl 2-((2*S*,3*S*)-3-methyl-3-nitro-4-oxochroman-2-yl)acetate (**2f**)

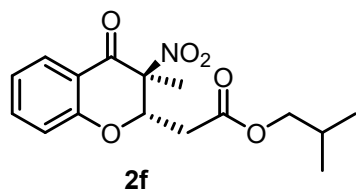

**10**

**2f** (158.7 mg, 99%), > 20:1 d.r., 97% ee, colorless oil. Optical rotation  $[\alpha]_D^{25} = -62.2$  ( $c$



1.0, CHCl<sub>3</sub>). <sup>1</sup>H NMR (400 MHz, CDCl<sub>3</sub>) δ 7.96 (dd, *J* = 8.0, 1.6 Hz, 1H), 7.61-7.56 (m, 1H), 7.17-7.13 (m, 1H), 7.02 (d, *J* = 8.0 Hz, 1H), 5.61 (dd, *J* = 10.0, 2.0 Hz, 1H), 4.00-3.96 (m, 1H), 3.95 (dd, *J* = 6.4, 4.4 Hz, 1H), 2.87 (dd, *J* = 16.0, 10.0 Hz, 1H), 2.47 (dd, *J* = 16.0, 2.0 Hz, 1H), 1.96 (hept, *J* = 6.8 Hz, 1H), 1.76 (s, 3H), 0.94 (d, *J* = 6.8 Hz, 6H). <sup>13</sup>C NMR (100 MHz, CDCl<sub>3</sub>) δ 185.10, 168.58, 159.79, 137.66, 128.64, 123.31, 118.35, 118.25, 92.30, 78.16, 71.68, 34.67, 27.81, 19.14 (2C), 14.46. HRMS (ESI): Calcd for C<sub>16</sub>H<sub>19</sub>NNaO<sub>6</sub> [M+Na]<sup>+</sup>: 344.1105. Found: 344.1123.

neopentyl 2-((2*S*,3*S*)-3-methyl-3-nitro-4-oxochroman-2-yl)acetate (**2g**)

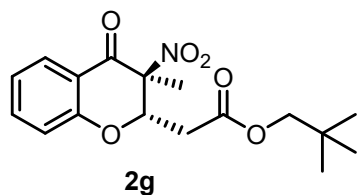

10

**2g** (165.2 mg, 99%), > 20:1 d.r., 98% ee, colorless oil. Optical rotation [ $\alpha$ ] = -42.7 (*c* 1.0, CHCl<sub>3</sub>). <sup>1</sup>H NMR (400 MHz, CDCl<sub>3</sub>) δ 7.95 (d, *J* = 8.0 Hz, 1H), 7.61-7.57 (m, 1H), 7.17-7.13 (m, 1H), 7.02 (d, *J* = 8.0 Hz, 1H), 5.61 (d, *J* = 10.0 Hz, 1H), 3.90 (d, *J* = 10.4 Hz, 1H), 3.85 (d, *J* = 10.4 Hz, 1H), 2.90 (dd, *J* = 16.0, 10.0 Hz, 1H), 2.47 (d, *J* = 16.0 Hz, 1H), 1.76 (s, 3H), 0.94 (s, 9H). <sup>13</sup>C NMR (100 MHz, CDCl<sub>3</sub>) δ 185.13, 168.61, 159.76, 137.68, 128.65, 123.32, 118.31, 118.24, 92.30, 78.15, 74.86, 34.69, 31.54, 26.51 (3C), 14.44. HRMS (ESI): Calcd for C<sub>17</sub>H<sub>21</sub>NNaO<sub>6</sub> [M+Na]<sup>+</sup>: 358.1261. Found: 358.1283.

cyclohexyl 2-((2*S*,3*S*)-3-methyl-3-nitro-4-oxochroman-2-yl)acetate (**2h**)

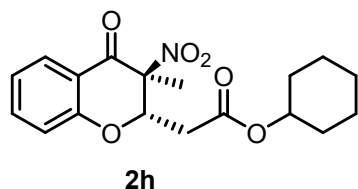

10

**2h** (168.0 mg, 97%), 17:1 d.r., 93% ee, colorless oil. Optical rotation [ $\alpha$ ] = -23.4 (*c* 1.0, CHCl<sub>3</sub>). <sup>1</sup>H NMR (400 MHz, CDCl<sub>3</sub>) δ 7.96 (d, *J* = 8.0 Hz, 1H), 7.60-7.56 (m, 1H), 7.17-7.13 (m, 1H), 7.02 (d, *J* = 8.0 Hz, 1H), 5.59 (d, *J* = 10.0 Hz, 1H), 4.89-4.84 (m, 1H), 2.84 (dd, *J* = 16.0, 10.0 Hz, 1H), 2.44 (d, *J* = 16.0 Hz, 1H), 1.87-1.83 (m, 2H), 1.75 (s, 3H), 1.73-1.70 (m, 2H), 1.57-1.28 (m, 6H). HRMS (ESI): Calcd for C<sub>18</sub>H<sub>21</sub>NNaO<sub>6</sub> [M+Na]<sup>+</sup>: 370.1261. Found: 370.1282.

neopentyl 2-((2*S*,3*S*)-3-ethyl-3-nitro-4-oxochroman-2-yl)acetate (**2i**)

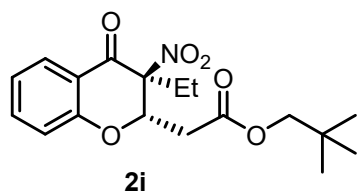

10

**2i** (172.2 mg, 99%), > 20:1 d.r., 95% ee, colorless oil. Optical rotation [ $\alpha$ ] = -53.7 (*c*

1.0, CHCl<sub>3</sub>). **<sup>1</sup>H NMR** (400 MHz, CDCl<sub>3</sub>)  $\delta$  7.95 (d,  $J$  = 8.0 Hz, 1H), 7.58-7.54 (m, 1H), 7.16-7.12 (m, 1H), 6.99 (d,  $J$  = 8.0 Hz, 1H), 5.61 (dd,  $J$  = 10.0, 2.4 Hz, 1H), 3.89 (d,  $J$  = 10.4 Hz, 1H), 3.84 (d,  $J$  = 10.4 Hz, 1H), 2.89 (dd,  $J$  = 16.0, 10.0 Hz, 1H), 2.47 (d,  $J$  = 16.0, 2.4 Hz, 1H), 2.31-2.15 (m, 2H), 1.02 (t,  $J$  = 8.0 Hz, 3H), 0.93 (s, 9H). **<sup>13</sup>C NMR** (100 MHz, CDCl<sub>3</sub>)  $\delta$  184.06, 168.66, 159.25, 137.49, 128.29, 123.16, 119.09, 118.23, 95.23, 78.75, 74.84, 34.36, 31.53, 26.50 (3C), 21.44, 8.35. HRMS (ESI): Calcd for C<sub>18</sub>H<sub>23</sub>NNaO<sub>6</sub> [M+Na]<sup>+</sup>: 372.1418. Found: 372.1417.

neopentyl 2-((2*S*,3*S*)-3,6-dimethyl-3-nitro-4-oxochroman-2-yl)acetate (**2j**)

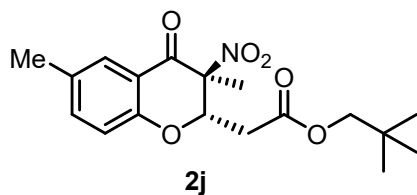

**10**

**2j** (172.2 mg, 99%), > 20:1 d.r., > 99% ee, colorless oil. Optical rotation [ $\alpha$ ] = -54.6 (*c* 1.0, CHCl<sub>3</sub>). **<sup>1</sup>H NMR** (400 MHz, CDCl<sub>3</sub>)  $\delta$  7.73 (s, 1H), 7.39 (d,  $J$  = 8.0 Hz, 1H), 6.91 (d,  $J$  = 8.0 Hz, 1H), 5.57 (d,  $J$  = 10.0 Hz, 1H), 3.90 (d,  $J$  = 10.4 Hz, 1H), 3.85 (d,  $J$  = 10.4 Hz, 1H), 2.88 (dd,  $J$  = 16.0, 10.0 Hz, 1H), 2.45 (d,  $J$  = 16.0 Hz, 1H), 2.33 (s, 3H), 1.75 (s, 3H), 0.94 (s, 9H). **<sup>13</sup>C NMR** (100 MHz, CDCl<sub>3</sub>)  $\delta$  185.30, 168.64, 157.89, 138.81, 133.03, 128.07, 118.01, 117.94, 92.41, 78.14, 74.81, 34.73, 31.54, 26.52 (3C), 20.59, 14.45. HRMS (ESI): Calcd for C<sub>18</sub>H<sub>23</sub>NNaO<sub>6</sub> [M+Na]<sup>+</sup>: 372.1418. Found: 372.1418.

neopentyl 2-((2*S*,3*S*)-6-(*tert*-butyl)-3-methyl-3-nitro-4-oxochroman-2-yl)acetate (**2k**)

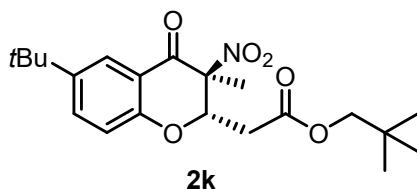

**2k** (187.1 mg, 97%), > 20:1 d.r., 95% ee, white solid, m.p. 118-119 °C. Optical rotation [ $\alpha$ ] = -56.6 (*c* 1.0, CHCl<sub>3</sub>). **<sup>1</sup>H NMR** (400 MHz, CDCl<sub>3</sub>)  $\delta$  7.91 (d,  $J$  = 2.0 Hz, 1H), 7.63 (dd,  $J$  = 8.0, 2.0 Hz, 1H), 6.95 (d,  $J$  = 8.0 Hz, 1H), 5.58 (dd,  $J$  = 10.0, 1.6 Hz, 1H), 3.91 (d,  $J$  = 10.4 Hz, 1H), 3.85 (d,  $J$  = 10.4 Hz, 1H), 2.89 (dd,  $J$  = 16.0, 10.0 Hz, 1H), 2.46 (dd,  $J$  = 16.0, 1.6 Hz, 1H), 1.76 (s, 3H), 1.31 (s, 9H), 0.94 (s, 9H). **<sup>13</sup>C NMR** (100 MHz, CDCl<sub>3</sub>)  $\delta$  185.47, 168.66, 157.85, 146.43, 135.56, 124.51, 117.86, 117.56, 92.51, 78.12, 74.81, 34.76, 34.64, 31.54, 31.27 (3C), 26.53 (3C), 14.45. HRMS (ESI): Calcd for C<sub>21</sub>H<sub>29</sub>NNaO<sub>6</sub> [M+Na]<sup>+</sup>: 414.1887. Found: 414.1901.

neopentyl 2-((2*S*,3*S*)-6-methoxy-3-methyl-3-nitro-4-oxochroman-2-yl)acetate (**2l**)

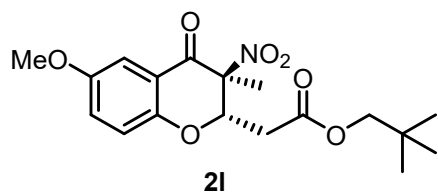

**2l** (168.9 mg, 93%), > 20:1 d.r., 90% ee, white solid, m.p. 77-78 °C. Optical rotation [ $\alpha$ ]<sub>D</sub>

= -50.1 (*c* 1.0, CHCl<sub>3</sub>). **<sup>1</sup>H NMR** (400 MHz, CDCl<sub>3</sub>)  $\delta$  7.32 (d, *J* = 2.8 Hz, 1H), 7.17 (dd, *J* = 8.0, 2.8 Hz, 1H), 6.94 (d, *J* = 8.0 Hz, 1H), 5.56 (dd, *J* = 10.0, 1.2 Hz, 1H), 3.91 (d, *J* = 10.4 Hz, 1H), 3.84 (d, *J* = 10.4 Hz, 1H), 3.81 (s, 3H), 2.88 (dd, *J* = 16.0, 10.0 Hz, 1H), 2.44 (dd, *J* = 16.0, 1.2 Hz, 1H), 1.75 (s, 3H), 0.94 (s, 9H). **<sup>13</sup>C NMR** (100 MHz, CDCl<sub>3</sub>)  $\delta$  185.26, 168.63, 155.36, 154.54, 127.11, 119.57, 118.26, 108.34, 92.47, 78.39, 74.81, 56.02, 34.69, 31.54, 26.51 (3C), 14.46. HRMS (ESI): Calcd for C<sub>18</sub>H<sub>23</sub>NNaO<sub>7</sub> [M+Na]<sup>+</sup>: 388.1367. Found: 388.1379.

neopentyl 2-((2*S*,3*S*)-6-fluoro-3-methyl-3-nitro-4-oxochroman-2-yl)acetate (**2m**)

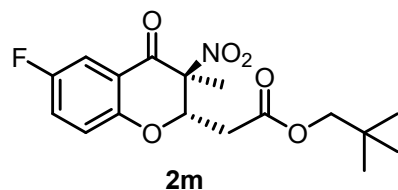

**20**

**2m** (159.7 mg, 91%), 9:1 d.r., 91% ee, white solid, m.p. 51-53 °C. Optical rotation [ $\alpha$ ] = -52.7 (*c* 1.0, CHCl<sub>3</sub>). **<sup>1</sup>H NMR** (400 MHz, CDCl<sub>3</sub>)  $\delta$  7.60 (dd, *J* = 8.0, 2.4 Hz, 1H), 7.34-7.29 (m, 1H), 7.01 (dd, *J* = 8.0, 4.0 Hz, 1H), 5.59 (dd, *J* = 10.0, 1.2 Hz, 1H), 3.90 (d, *J* = 10.4 Hz, 1H), 3.87 (d, *J* = 10.4 Hz, 1H), 2.88 (dd, *J* = 16.0, 10.0 Hz, 1H), 2.47 (d, *J* = 16.0 Hz, 1H), 1.76 (s, 3H), 0.94 (s, 9H). **<sup>13</sup>C NMR** (100 MHz, CDCl<sub>3</sub>)  $\delta$  184.45, 168.46, 158.17 (d, *J* = 243.6 Hz, 1C), 156.01 (d, *J* = 1.6 Hz, 1C), 125.42 (d, *J* = 24.6 Hz, 1C), 120.14 (d, *J* = 7.5 Hz, 1C), 119.01 (d, *J* = 7.0 Hz, 1C), 113.55 (d, *J* = 23.8 Hz, 1C), 92.06, 78.56, 74.92, 34.54, 31.54, 26.51 (3C), 14.49. **<sup>19</sup>F NMR** (375 MHz, CDCl<sub>3</sub>)  $\delta$  -118.30. HRMS (ESI): Calcd for C<sub>17</sub>H<sub>20</sub>FNNaO<sub>6</sub> [M+Na]<sup>+</sup>: 376.1167. Found: 376.1172.

neopentyl 2-((2*R*,3*R*)-6-fluoro-3-methyl-3-nitro-4-oxochroman-2-yl)acetate ((2*R*,3*R*)-**2m**)

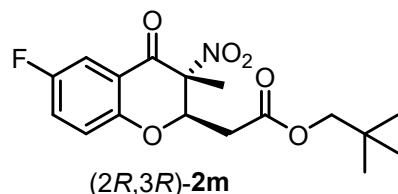

(**2R,3R**)-**2m** was prepared according to general procedure using (1*R*,2*R*)-**CAT-6** as catalyst. **20**

161.8 mg, 92%, 9:1 d.r., 91% ee, white solid, m.p. 63-64 °C. Optical rotation [ $\alpha$ ] = +54.6 (*c* 1.0, CHCl<sub>3</sub>). HRMS (ESI): Calcd for C<sub>17</sub>H<sub>20</sub>FNNaO<sub>6</sub> [M+Na]<sup>+</sup>: 376.1167. Found: 376.1160.

neopentyl 2-(6-fluoro-3-methyl-3-nitro-4-oxochroman-2-yl)acetate (*rac*-**2m**)

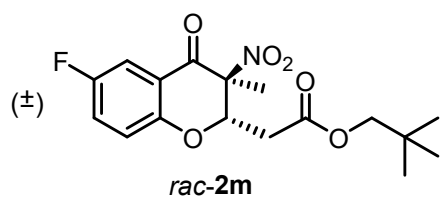

Preparation of **rac-2m** was carried out following the literature procedure.<sup>1</sup> 172.5 mg, 98%, 10:1 d.r., white solid, m.p. 59-62 °C.

neopentyl 2-((2*S*,3*S*)-6-chloro-3-methyl-3-nitro-4-oxochroman-2-yl)acetate (**2n**)

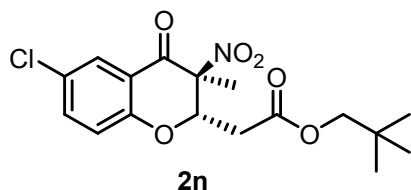

10

**2n** (169.4 mg, 92%), 9:1 d.r., 91% ee, colorless oil. Optical rotation  $[\alpha]_D^{25} = -51.8$  (*c* 1.0, CHCl<sub>3</sub>). <sup>1</sup>H NMR (400 MHz, CDCl<sub>3</sub>)  $\delta$  7.90 (d, *J* = 2.0 Hz, 1H), 7.52 (dd, *J* = 8.8, 2.0 Hz, 1H), 6.99 (d, *J* = 8.8 Hz, 1H), 5.60 (dd, *J* = 10.0, 1.6 Hz, 1H), 3.91 (d, *J* = 10.4 Hz, 1H), 3.85 (d, *J* = 10.4 Hz, 1H), 2.88 (dd, *J* = 16.0, 10.0 Hz, 1H), 2.48 (dd, *J* = 16.0, 1.6 Hz, 1H), 1.75 (s, 3H), 0.94 (s, 9H). <sup>13</sup>C NMR (100 MHz, CDCl<sub>3</sub>)  $\delta$  184.07, 168.38, 158.12, 137.57, 129.04, 127.78, 119.99, 119.28, 91.91, 78.48, 74.95, 34.51, 31.54, 26.51 (3C), 14.53. HRMS (ESI): Calcd for C<sub>17</sub>H<sub>20</sub>ClNNaO<sub>6</sub> [M+Na]<sup>+</sup>: 392.0871. Found: 392.0898 ([M+Na]<sup>+</sup>), 394.0869 ([M+2+Na]<sup>+</sup>).

neopentyl 2-((2*S*,3*S*)-6-bromo-3-methyl-3-nitro-4-oxochroman-2-yl)acetate (**2o**)

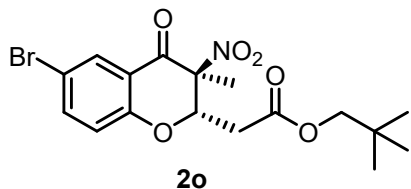

10

**2o** (189.9 mg, 92%), 10:1 d.r., 90% ee, colorless oil. Optical rotation  $[\alpha]_D^{25} = -43.6$  (*c* 1.0, CHCl<sub>3</sub>). <sup>1</sup>H NMR (400 MHz, CDCl<sub>3</sub>)  $\delta$  8.06 (d, *J* = 2.0 Hz, 1H), 7.66 (dd, *J* = 8.8, 2.0 Hz, 1H), 6.93 (d, *J* = 8.8 Hz, 1H), 5.60 (dd, *J* = 10.0, 2.0 Hz, 1H), 3.90 (d, *J* = 10.4 Hz, 1H), 3.85 (d, *J* = 10.4 Hz, 1H), 2.88 (dd, *J* = 16.0, 10.0 Hz, 1H), 2.48 (dd, *J* = 16.0, 2.0 Hz, 1H), 1.75 (s, 3H), 0.94 (s, 9H). <sup>13</sup>C NMR (100 MHz, CDCl<sub>3</sub>)  $\delta$  183.92, 168.37, 158.58, 140.35, 130.89, 120.28, 119.73, 116.11, 91.85, 78.44, 74.96, 34.51, 31.54, 26.52 (3C), 14.54. HRMS (ESI): Calcd for C<sub>17</sub>H<sub>20</sub>BrNNaO<sub>6</sub> [M+Na]<sup>+</sup>: 436.0366. Found: 436.0391 ([M+Na]<sup>+</sup>), 438.0390 ([M+2+Na]<sup>+</sup>).

neopentyl 2-((2*S*,3*S*)-5-fluoro-3-methyl-3-nitro-4-oxochroman-2-yl)acetate (**2p**)

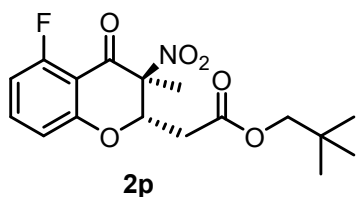

10

**2p** (158.8 mg, 90%), 6:1 d.r., 87% ee, colorless oil. Optical rotation  $[\alpha]_D^{25} = -42.0$  ( $c$  1.0,  $\text{CHCl}_3$ ).  **$^1\text{H NMR}$**  (400 MHz,  $\text{CDCl}_3$ )  $\delta$  7.56-7.50 (m, 1H), 6.86-6.82 (m, 2H), 5.62 (dd,  $J = 10.0, 2.0$  Hz, 1H), 3.90 (d,  $J = 10.4$  Hz, 1H), 3.85 (d,  $J = 10.4$  Hz, 1H), 2.87 (dd,  $J = 16.0, 10.0$  Hz, 1H), 2.49 (dd,  $J = 16.0, 2.0$  Hz, 1H), 1.77 (s, 3H), 0.94 (s, 9H).  **$^{13}\text{C NMR}$**  (100 MHz,  $\text{CDCl}_3$ )  $\delta$  182.16, 168.41, 162.47 (d,  $J = 267.9$  Hz, 1C), 160.13 (d,  $J = 2.5$  Hz, 1C), 137.83 (d,  $J = 11.6$  Hz, 1C), 114.01 (d,  $J = 4.0$  Hz, 1C), 110.78 (d,  $J = 20.3$  Hz, 1C), 108.82 (d,  $J = 9.5$  Hz, 1C), 92.25, 78.08, 74.93, 34.50, 31.52, 26.50 (3C), 14.65.  **$^{19}\text{F NMR}$**  (375 MHz,  $\text{CDCl}_3$ )  $\delta$  -107.74. HRMS (ESI): Calcd for  $\text{C}_{17}\text{H}_{20}\text{FNNaO}_6$   $[\text{M}+\text{Na}]^+$ : 376.1167. Found: 376.1187.

neopentyl 2-((2S,3S)-5-chloro-3-methyl-3-nitro-4-oxochroman-2-yl)acetate (**2q**)

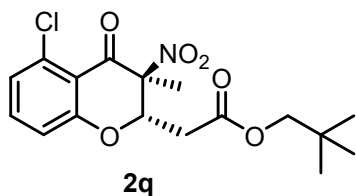

10

**2q** (167.6 mg, 91%), 8:1 d.r., 92% ee, colorless oil. Optical rotation  $[\alpha]_D^{25} = -34.1$  ( $c$  1.0,  $\text{CHCl}_3$ ).  **$^1\text{H NMR}$**  (400 MHz,  $\text{CDCl}_3$ )  $\delta$  7.46-7.42 (m, 1H), 7.18 (d,  $J = 8.0$  Hz, 1H), 6.95 (d,  $J = 8.0$  Hz, 1H), 5.63 (dd,  $J = 10.0, 2.0$  Hz, 1H), 3.90 (d,  $J = 10.4$  Hz, 1H), 3.85 (d,  $J = 10.4$  Hz, 1H), 2.85 (dd,  $J = 16.0, 10.0$  Hz, 1H), 2.48 (dd,  $J = 16.0, 2.0$  Hz, 1H), 1.77 (s, 3H), 0.94 (s, 9H).  **$^{13}\text{C NMR}$**  (100 MHz,  $\text{CDCl}_3$ )  $\delta$  182.74, 168.42, 160.97, 136.37, 136.21, 126.53, 117.25, 115.92, 92.30, 77.67, 74.93, 34.53, 31.52, 26.51 (3C), 14.82. HRMS (ESI): Calcd for  $\text{C}_{17}\text{H}_{20}\text{ClNaO}_6$   $[\text{M}+\text{Na}]^+$ : 392.0871. Found: 392.0882 ( $[\text{M}+\text{Na}]^+$ ), 394.0845 ( $[\text{M}+2+\text{Na}]^+$ ).

neopentyl 2-((2S,3S)-3,5-dimethyl-3-nitro-4-oxochroman-2-yl)acetate (**2r**)

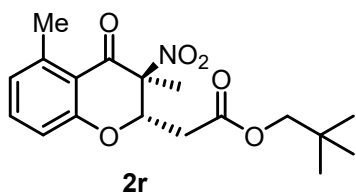

10

**2r** (159.1 mg, 91%), > 20:1 d.r., 97% ee, colorless oil. Optical rotation  $[\alpha]_D^{25} = -50.4$  ( $c$  1.0,  $\text{CHCl}_3$ ).  **$^1\text{H NMR}$**  (400 MHz,  $\text{CDCl}_3$ )  $\delta$  7.43-7.39 (m, 1H), 6.92 (d,  $J = 8.0$  Hz, 1H), 6.87 (d,  $J = 8.0$  Hz, 1H), 5.59 (dd,  $J = 10.0, 1.6$  Hz, 1H), 3.91 (d,  $J = 10.4$  Hz, 1H), 3.85 (d,  $J = 10.4$  Hz, 1H), 2.87 (dd,  $J = 16.0, 10.0$  Hz, 1H), 2.84 (s, 3H), 2.47 (dd,  $J = 16.0, 1.6$  Hz, 1H), 1.75 (s, 3H), 0.94 (s, 9H).  **$^{13}\text{C NMR}$**  (100 MHz,  $\text{CDCl}_3$ )  $\delta$  186.09, 168.70, 160.81, 144.11, 136.35, 126.35, 116.80, 116.14, 92.99, 77.25, 74.80, 34.77, 31.54, 26.53 (3C), 22.84, 14.62. HRMS (ESI): Calcd for  $\text{C}_{18}\text{H}_{23}\text{NNaO}_6$   $[\text{M}+\text{Na}]^+$ : 372.1418. Found: 372.1424.

neopentyl 2-((2*S*,3*S*)-7-fluoro-3-methyl-3-nitro-4-oxochroman-2-yl)acetate (**2s**)

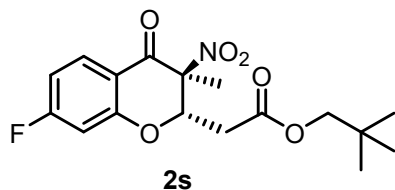

20

**2s** (162.5 mg, 92%), 10:1 d.r., 94% ee, colorless oil. Optical rotation  $[\alpha]_D^{25} = -60.5$  ( $c$  1.0,  $\text{CHCl}_3$ ).  $^1\text{H NMR}$  (400 MHz,  $\text{CDCl}_3$ )  $\delta$  7.99 (dd,  $J = 8.0, 6.4$  Hz, 1H), 6.91-6.86 (m, 1H), 6.72 (dd,  $J = 10.0, 2.0$  Hz, 1H), 5.63 (dd,  $J = 10.0, 1.6$  Hz, 1H), 3.90 (d,  $J = 10.4$  Hz, 1H), 3.86 (d,  $J = 10.4$  Hz, 1H), 2.88 (dd,  $J = 16.0, 10.0$  Hz, 1H), 2.48 (dd,  $J = 16.0, 1.6$  Hz, 1H), 1.76 (s, 3H), 0.95 (s, 9H).  $^{13}\text{C NMR}$  (100 MHz,  $\text{CDCl}_3$ )  $\delta$  183.74, 168.39 (d,  $J = 258.5$  Hz, 1C), 168.40, 161.43 (d,  $J = 13.8$  Hz, 1C), 131.33 (d,  $J = 11.5$  Hz, 1C), 115.24 (d,  $J = 2.4$  Hz, 1C), 112.08 (d,  $J = 22.9$  Hz, 1C), 105.33 (d,  $J = 24.9$  Hz, 1C), 91.91, 78.69, 74.94, 34.55, 31.52, 26.50 (3C), 14.55.  $^{19}\text{F NMR}$  (375 MHz,  $\text{CDCl}_3$ )  $\delta$  -96.57. HRMS (ESI): Calcd for  $\text{C}_{17}\text{H}_{20}\text{FNNaO}_6$   $[\text{M}+\text{Na}]^+$ : 376.1167. Found: 376.1182.

neopentyl 2-((2*S*,3*S*)-7-chloro-3-methyl-3-nitro-4-oxochroman-2-yl)acetate (**2t**)

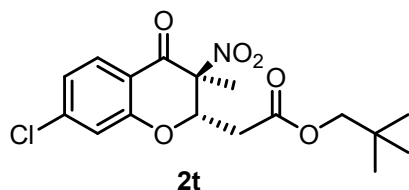

20

**2t** (170.2 mg, 92%), 10:1 d.r., 95% ee, white solid, m.p. 73-75 °C. Optical rotation  $[\alpha]_D^{25} = -64.0$  ( $c$  1.0,  $\text{CHCl}_3$ ).  $^1\text{H NMR}$  (400 MHz,  $\text{CDCl}_3$ )  $\delta$  7.90 (d,  $J = 8.0$  Hz, 1H), 7.13 (d,  $J = 8.0$  Hz, 1H), 7.06 (s, 1H), 5.62 (d,  $J = 10.0$  Hz, 1H), 3.90 (d,  $J = 10.4$  Hz, 1H), 3.87 (d,  $J = 10.4$  Hz, 1H), 2.88 (dd,  $J = 16.0, 10.0$  Hz, 1H), 2.47 (d,  $J = 16.0$  Hz, 1H), 1.75 (s, 3H), 0.95 (s, 9H).  $^{13}\text{C NMR}$  (100 MHz,  $\text{CDCl}_3$ )  $\delta$  184.09, 168.39, 159.95, 143.92, 129.78, 124.28, 118.52, 116.94, 91.93, 78.58, 74.97, 34.50, 31.52, 26.51 (3C), 14.56. HRMS (ESI): Calcd for  $\text{C}_{17}\text{H}_{20}\text{ClNNaO}_6$   $[\text{M}+\text{Na}]^+$ : 392.0871. Found: 392.0874 ( $[\text{M}+\text{Na}]^+$ ), 394.0847 ( $[\text{M}+2+\text{Na}]^+$ ).

neopentyl 2-((2*S*,3*S*)-3,7-dimethyl-3-nitro-4-oxochroman-2-yl)acetate (**2u**)

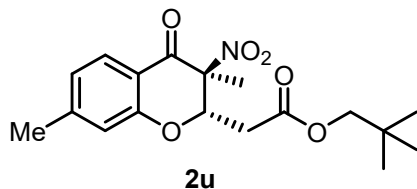

20

**2u** (169.4 mg, 98%), > 20:1 d.r., 94% ee, colorless oil. Optical rotation  $[\alpha]_D^{25} = -63.1$  ( $c$  1.0,  $\text{CHCl}_3$ ).  $^1\text{H NMR}$  (400 MHz,  $\text{CDCl}_3$ )  $\delta$  7.83 (d,  $J = 8.0$  Hz, 1H), 6.96 (d,  $J = 8.0$  Hz, 1H), 6.82 (s, 1H), 5.58 (dd,  $J = 10.0, 1.6$  Hz, 1H), 3.90 (d,  $J = 10.4$  Hz, 1H), 3.86 (d,  $J = 10.4$  Hz, 1H), 2.88 (dd,  $J = 16.0, 10.0$  Hz, 1H), 2.46 (dd,  $J = 16.0, 1.6$  Hz, 1H), 2.38 (s, 3H), 1.74 (s,

3H), 0.95 (s, 9H).  $^{13}\text{C}$  NMR (100 MHz,  $\text{CDCl}_3$ )  $\delta$  184.78, 168.68, 159.81, 149.75, 128.47, 124.72, 118.22, 115.98, 92.31, 78.11, 74.82, 34.69, 31.52, 26.52 (3C), 22.24, 14.49. HRMS (ESI): Calcd for  $\text{C}_{18}\text{H}_{23}\text{NNaO}_6$   $[\text{M}+\text{Na}]^+$ : 372.1418. Found: 372.1431.

neopentyl 2-((2*S*,3*S*)-8-fluoro-3-methyl-3-nitro-4-oxochroman-2-yl)acetate (**2v**)

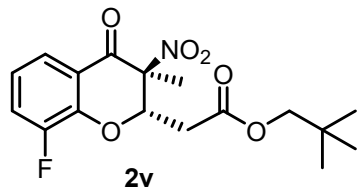

**2v**

**2v** (164.5 mg, 93%), 15:1 d.r., 92% ee, white solid, m.p. 97-99 °C. Optical rotation  $[\alpha] = -47.6$  (*c* 1.0,  $\text{CHCl}_3$ ).  $^1\text{H}$  NMR (400 MHz,  $\text{CDCl}_3$ )  $\delta$  7.74 (d,  $J = 8.0$  Hz, 1H), 7.41-7.37 (m, 1H), 7.13-7.08 (m, 1H), 5.68 (dd,  $J = 10.0, 1.6$  Hz, 1H), 3.90 (d,  $J = 10.4$  Hz, 1H), 3.87 (d,  $J = 10.4$  Hz, 1H), 2.94 (dd,  $J = 16.0, 10.0$  Hz, 1H), 2.51 (dd,  $J = 16.0, 1.6$  Hz, 1H), 1.79 (s, 3H), 0.95 (s, 9H).  $^{13}\text{C}$  NMR (100 MHz,  $\text{CDCl}_3$ )  $\delta$  184.22 (d,  $J = 3.3$  Hz, 1C), 168.27, 151.35 (d,  $J = 250.2$  Hz, 1C), 148.09 (d,  $J = 12.2$  Hz, 1C), 123.67 (d,  $J = 7.1$  Hz, 1C), 123.57 (d,  $J = 6.1$  Hz, 1C), 123.05 (d,  $J = 6.3$  Hz, 1C), 120.43, 92.10, 79.00, 75.04, 34.57, 31.48, 26.46 (3C), 14.56.  $^{19}\text{F}$  NMR (375 MHz,  $\text{CDCl}_3$ )  $\delta$  -132.96. HRMS (ESI): Calcd for  $\text{C}_{17}\text{H}_{20}\text{FNNaO}_6$   $[\text{M}+\text{Na}]^+$ : 376.1167. Found: 376.1183.

neopentyl 2-((2*S*,3*S*)-8-chloro-3-methyl-3-nitro-4-oxochroman-2-yl)acetate (**2w**)

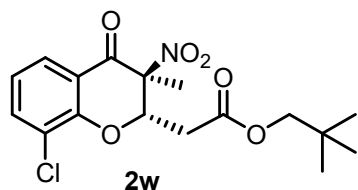

**2w**

**2w** (173.9 mg, 94%), 17:1 d.r., 93% ee, white solid, m.p. 90-92 °C. Optical rotation  $[\alpha] = -66.1$  (*c* 1.0,  $\text{CHCl}_3$ ).  $^1\text{H}$  NMR (400 MHz,  $\text{CDCl}_3$ )  $\delta$  7.88 (dd,  $J = 8.0, 1.2$  Hz, 1H), 7.66 (dd,  $J = 8.0, 1.2$  Hz, 1H), 7.13-7.09 (m, 1H), 5.68 (dd,  $J = 10.0, 1.6$  Hz, 1H), 3.92 (d,  $J = 10.4$  Hz, 1H), 3.87 (d,  $J = 10.4$  Hz, 1H), 2.96 (dd,  $J = 16.0, 10.0$  Hz, 1H), 2.52 (dd,  $J = 16.0, 1.6$  Hz, 1H), 1.78 (s, 3H), 0.95 (s, 9H).  $^{13}\text{C}$  NMR (100 MHz,  $\text{CDCl}_3$ )  $\delta$  184.44, 168.29, 155.32, 137.69, 127.09, 123.46, 123.44, 119.76, 91.86, 79.02, 75.08, 34.56, 31.46, 26.52 (3C), 14.56. HRMS (ESI): Calcd for  $\text{C}_{17}\text{H}_{20}\text{ClNNaO}_6$   $[\text{M}+\text{Na}]^+$ : 392.0871. Found: 392.0885 ( $[\text{M}+\text{Na}]^+$ ), 394.0846 ( $[\text{M}+2+\text{Na}]^+$ ).

neopentyl 2-((2*S*,3*S*)-3,8-dimethyl-3-nitro-4-oxochroman-2-yl)acetate (**2x**)

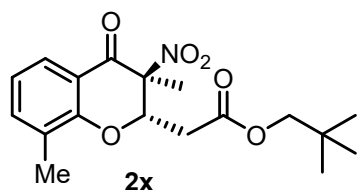

**2x** (171.4 mg, 98%), > 20:1 d.r., 95% ee, white solid, m.p. 86-88 °C. Optical rotation  $[\alpha]$

10

= -54.1 (*c* 1.0, CHCl<sub>3</sub>). **<sup>1</sup>H NMR** (400 MHz, CDCl<sub>3</sub>)  $\delta$  7.80 (d, *J* = 8.0 Hz, 1H), 7.43 (d, *J* = 8.0 Hz, 1H), 7.06-7.03 (m, 1H), 5.59 (d, *J* = 10.0, 1.6 Hz, 1H), 3.90 (d, *J* = 10.4 Hz, 1H), 3.84 (d, *J* = 10.4 Hz, 1H), 2.91 (dd, *J* = 16.0, 10.0 Hz, 1H), 2.49 (dd, *J* = 16.0, 1.6 Hz, 1H), 2.21 (s, 3H), 1.76 (s, 3H), 0.95 (s, 9H). **<sup>13</sup>C NMR** (100 MHz, CDCl<sub>3</sub>)  $\delta$  185.47, 168.72, 158.01, 138.54, 127.75, 126.21, 122.82, 118.09, 92.26, 78.18, 74.89, 34.63, 31.46, 26.51 (3C), 15.38, 14.43. HRMS (ESI): Calcd for C<sub>18</sub>H<sub>23</sub>NNaO<sub>6</sub> [M+Na]<sup>+</sup>: 372.1418. Found: 372.1414.

### General Procedure for the synthesis of 3

To a solution of **2** (0.5 mmol, 1 equiv.) in 20 mL of 1,4-dioxane was added 20 mL of 6 N HCl. The resulting mixture was heated to 100 °C and stirred for 2 h. After cooling to rt, the mixture was extracted with EtOAc (3 × 20 mL). The combined organic extracts were washed with brine (20 mL), then dried over Na<sub>2</sub>SO<sub>4</sub>, filtered and concentrated in vacuo to give a crude carboxylic acid product. To the solution of crude carboxylic acid in 20 mL of dry CH<sub>2</sub>Cl<sub>2</sub> was added R<sup>4</sup>NH<sub>2</sub> (0.55 mmol, 1.1 equiv.), Et<sub>3</sub>N (1.1 mmol, 2 equiv.), HOBT (1.1 mmol, 2 equiv.) and EDCI (1.1 mmol, 2 equiv.) at 0 °C. The resulting mixture was stirred at 0 °C for 12 h. 1 N HCl (10 mL) was added and the biphasic mixture was extracted with CH<sub>2</sub>Cl<sub>2</sub> (3 × 20 mL). The combined organic extracts were washed with brine (20 mL), then dried over Na<sub>2</sub>SO<sub>4</sub>, filtered, concentrated in vacuo to give a residue. The residue was purified by silica gel chromatography (petroleum ether:EtOAc, 5:1) and recrystallized with petroleum ether/EtOAc to afford desired products **3** (52-76%).

*N*-(adamantan-1-yl)-2-((2*S*,3*S*)-3,6-dimethyl-3-nitro-4-oxochroman-2-yl)acetamide (**3j**)

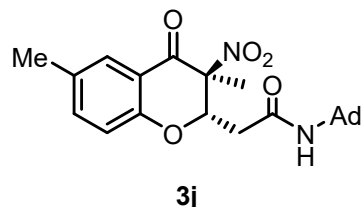

10

**3j** (115.3 mg, 56%), > 20:1 d.r., > 99% ee, colorless oil. Optical rotation [ $\alpha$ ] = -40.6 (*c* 1.0, CHCl<sub>3</sub>). **<sup>1</sup>H NMR** (400 MHz, CDCl<sub>3</sub>)  $\delta$  7.73 (s, 1H), 7.38 (d, *J* = 8.0 Hz, 1H), 6.91 (d, *J* = 8.0 Hz, 1H), 5.54 (dd, *J* = 10.0, 2.4 Hz, 1H), 5.31 (br s, 1H), 2.53 (dd, *J* = 14.8, 10.0 Hz, 1H), 2.33 (s, 3H), 2.25 (dd, *J* = 14.8, 2.4 Hz, 1H), 2.10-2.06 (m, 3H), 2.04-2.00 (m, 6H), 1.72 (s, 3H), 1.70-1.66 (m, 6H). **<sup>13</sup>C NMR** (100 MHz, CDCl<sub>3</sub>)  $\delta$  185.20, 166.14, 157.69, 138.69, 132.95, 128.03, 118.23, 118.03, 92.41, 78.99, 52.68, 41.69 (3C), 37.14, 36.39 (3C), 29.51 (3C), 20.60, 14.87. HRMS (ESI): Calcd for C<sub>23</sub>H<sub>28</sub>N<sub>2</sub>NaO<sub>5</sub> [M+Na]<sup>+</sup>: 435.1890. Found: 435.1907.

*N*-(adamantan-1-yl)-2-((2*S*,3*S*)-6-(tert-butyl)-3-methyl-3-nitro-4-oxochroman-2-yl)acetamide (**3k**)



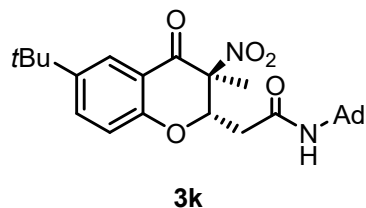

**3k** (118.2 mg, 52%), > 20:1 d.r., 95% ee, yellow solid, m.p. 189-191 °C. Optical rotation  $[\alpha]_D^{20} = -39.1$  (*c* 1.0, CHCl<sub>3</sub>). **<sup>1</sup>H NMR** (400 MHz, CDCl<sub>3</sub>)  $\delta$  7.91 (d, *J* = 2.0 Hz, 1H), 7.63 (dd, *J* = 8.0, 2.0 Hz, 1H), 6.96 (d, *J* = 8.0 Hz, 1H), 5.53 (dd, *J* = 10.0, 2.0 Hz, 1H), 5.34 (br s, 1H), 2.55 (dd, *J* = 14.8, 10.0 Hz, 1H), 2.25 (dd, *J* = 14.8, 2.0 Hz, 1H), 2.10-2.05 (m, 3H), 2.04-2.00 (m, 6H), 1.73 (s, 3H), 1.70-1.66 (m, 6H), 1.31 (s, 9H). **<sup>13</sup>C NMR** (100 MHz, CDCl<sub>3</sub>)  $\delta$  185.38, 166.20, 157.67, 146.39, 135.45, 124.48, 117.85 (2C), 92.52, 79.03, 52.66, 41.68 (3C), 37.23, 36.39 (3C), 34.63, 31.28 (3C), 29.51 (3C), 14.83. HRMS (ESI): Calcd for C<sub>26</sub>H<sub>34</sub>N<sub>2</sub>NaO<sub>5</sub> [M+Na]<sup>+</sup>: 477.2360. Found: 477.2379.

*N*-(adamantan-1-yl)-2-((2*S*,3*S*)-6-methoxy-3-methyl-3-nitro-4-oxochroman-2-yl)acetamide (**3l**)

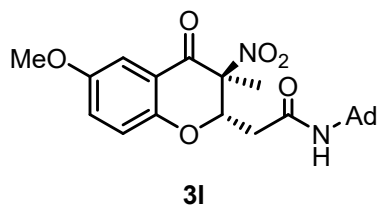

**3l** (142.5 mg, 67%), > 20:1 d.r., 90% ee, white solid, m.p. 215-218 °C. Optical rotation  $[\alpha]_D^{20} = -39.3$  (*c* 1.0, CHCl<sub>3</sub>). **<sup>1</sup>H NMR** (400 MHz, CDCl<sub>3</sub>)  $\delta$  7.32 (d, *J* = 1.6 Hz, 1H), 7.17 (dd, *J* = 8.8, 1.6 Hz, 1H), 6.94 (d, *J* = 8.8 Hz, 1H), 5.52 (dd, *J* = 10.0, 2.4 Hz, 1H), 5.32 (br s, 1H), 3.81 (s, 3H), 2.53 (dd, *J* = 14.8, 10.0 Hz, 1H), 2.24 (dd, *J* = 14.8, 2.4 Hz, 1H), 2.10-2.06 (m, 3H), 2.04-1.98 (m, 6H), 1.73 (s, 3H), 1.70-1.67 (m, 6H). **<sup>13</sup>C NMR** (100 MHz, CDCl<sub>3</sub>)  $\delta$  185.19, 166.15, 155.31, 154.35, 126.98, 119.58, 118.52, 108.35, 92.46, 79.19, 56.02, 52.69, 41.69 (3C), 37.10, 36.37 (3C), 29.50 (3C), 14.84. HRMS (ESI): Calcd for C<sub>23</sub>H<sub>28</sub>N<sub>2</sub>NaO<sub>6</sub> [M+Na]<sup>+</sup>: 451.1840. Found: 451.1862.

*N*-(adamantan-1-yl)-2-((2*S*,3*S*)-6-fluoro-3-methyl-3-nitro-4-oxochroman-2-yl)acetamide (**3m**)

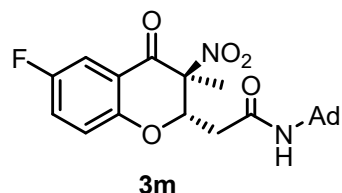

**3m** (158.6 mg, 76%), 9:1 d.r., 91% ee, white solid, m.p. 122-125 °C. Optical rotation  $[\alpha]_D^{20} = -39.9$  (*c* 1.0, CHCl<sub>3</sub>). **<sup>1</sup>H NMR** (400 MHz, CDCl<sub>3</sub>)  $\delta$  7.60 (dd, *J* = 8.0, 2.8 Hz, 1H), 7.33-7.28 (m, 1H), 7.01 (dd, *J* = 8.0, 4.4 Hz, 1H), 5.59 (dd, *J* = 10.0, 2.4 Hz, 1H), 5.22 (br s,

1H), 2.53 (dd,  $J = 14.8, 10.0$  Hz, 1H), 2.27 (dd,  $J = 14.8, 2.4$  Hz, 1H), 2.10-2.06 (m, 3H), 2.04-2.00 (m, 6H), 1.74 (s, 3H), 1.70-1.67 (m, 6H).  $^{13}\text{C}$  NMR (100 MHz,  $\text{CDCl}_3$ )  $\delta$  184.41, 165.84, 158.09 (d,  $J = 243.5$  Hz, 1C), 155.92 (d,  $J = 1.7$  Hz, 1C), 125.26 (d,  $J = 24.5$  Hz, 1C), 120.17 (d,  $J = 7.6$  Hz, 1C), 119.25 (d,  $J = 7.0$  Hz, 1C), 113.46 (d,  $J = 23.8$  Hz, 1C), 92.07, 79.33, 52.78, 41.69 (3C), 36.89, 36.36 (3C), 29.50 (3C), 14.88. HRMS (ESI): Calcd for  $\text{C}_{22}\text{H}_{25}\text{FN}_2\text{NaO}_5$   $[\text{M}+\text{Na}]^+$ : 439.1640. Found: 439.1649.

*N*-(adamantan-1-yl)-2-((2*R*,3*R*)-6-fluoro-3-methyl-3-nitro-4-oxochroman-2-yl)acetamide ((2*R*,3*R*)-**3m**)

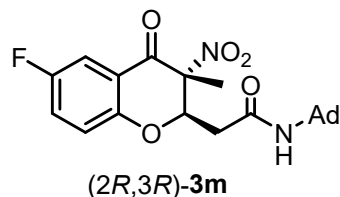

(2*R*,3*R*)-**3m** (150.6 mg, 72%), 9:1 d.r., 91% ee, white solid, m.p. 63-64 °C. Optical rotation  $[\alpha]_{\text{D}}^{20} = +54.6$  ( $c$  1.0,  $\text{CHCl}_3$ ). HRMS (ESI): Calcd for  $\text{C}_{17}\text{H}_{20}\text{FNNaO}_6$   $[\text{M}+\text{Na}]^+$ : 376.1167. Found: 376.1160.

*N*-(adamantan-1-yl)-2-(6-fluoro-3-methyl-3-nitro-4-oxochroman-2-yl)acetamide (*rac*-**3m**)

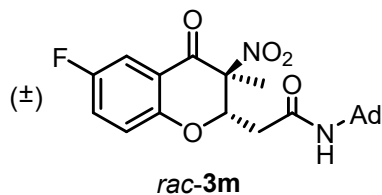

Preparation of *rac*-**3m** was carried out following the literature procedure.<sup>2</sup> 160.8 mg, 77%, 10:1 d.r., white solid, m.p. 59-62 °C.

*N*-benzyl-2-((2*S*,3*S*)-6-fluoro-3-methyl-3-nitro-4-oxochroman-2-yl)acetamide (**3y**)

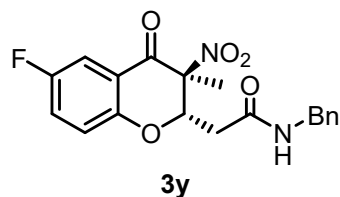

**3y** (131.8 mg, 71%), 9:1 d.r., 91% ee, white solid, m.p. 101-103 °C. Optical rotation  $[\alpha]_{\text{D}}^{20} = -25.8$  ( $c$  1.0,  $\text{CHCl}_3$ ).  $^1\text{H}$  NMR (400 MHz,  $\text{CDCl}_3$ )  $\delta$  7.52-7.50 (m, 1H), 7.28-7.26 (m, 1H), 7.22-7.18 (m, 5H), 6.86-6.84 (m, 1H), 5.80 (s, 1H), 5.58 (d,  $J = 10.0$  Hz, 1H), 4.48 (dd,  $J = 15.0, 4.0$  Hz, 1H), 4.34 (dd,  $J = 15.0, 4.0$  Hz, 1H), 2.55 (dd,  $J = 15.0, 10.0$  Hz, 1H), 2.31 (d,  $J = 15.0$  Hz, 1H), 1.66 (s, 3H).  $^{13}\text{C}$  NMR (100 MHz,  $\text{CDCl}_3$ )  $\delta$  184.37 (d,  $J = 2.0$  Hz, 1C), 167.04, 158.09 (d,  $J = 243.5$  Hz, 1C), 155.83 (d,  $J = 1.6$  Hz, 1C), 137.79, 128.89 (2C), 127.87 (3C), 125.33 (d,  $J = 24.5$  Hz, 1C), 120.13 (d,  $J = 7.6$  Hz, 1C), 119.10 (d,  $J = 7.0$  Hz, 1C), 113.42 (d,  $J = 23.9$  Hz, 1C), 92.08, 79.07, 44.03, 35.98, 14.66.  $^{19}\text{F}$  NMR (375 MHz,  $\text{CDCl}_3$ )  $\delta$  -118.29. HRMS (ESI): Calcd for  $\text{C}_{19}\text{H}_{17}\text{FN}_2\text{NaO}_5$   $[\text{M}+\text{Na}]^+$ : 395.1019. Found: 395.1010.

### 3. References

- 1 H. Chen, J. Xie, D. Xing, J. Wang, J. Tang, Z. Yi, F. Xia, W.-W. Qiu and F. Yang, *Org. Biomol. Chem.*, 2019, **17**, 1062-1066.
- 2 H. Chen, Y. Xing, J. Xie, J. Xie, D. Xing, J. Tang, F. Yang, Z. Yi and W.-W. Qiu, *RSC Adv.*, 2019, **9**, 33794–33799.

### 4. Biology materials and methods

#### 4.1 Cell lines and culture conditions

Human prostate cancer cell lines DU145 and PC3 were obtained from the American Type Culture Collection (ATCC). DU145 and PC3 cell lines were cultured in RPMI 1640 medium (Gibco). Both media were supplemented with 10% FBS (Wisent, St. Bruno, QC, Canada). All cells were incubated at 37 °C and 5% CO<sub>2</sub> incubator.

#### 4.2 Cell viability assay

The cell viability of cell lines in the presence of this series of compounds was determined by Sulforhodamine B (SRB) assay (Sigma Aldrich). Cells were seeded in 96-well plates (3000 cells/well) and incubated with indicated concentrations of compounds. After incubation for indicated time, the cells were then fixed with trichloroacetic acid, stained with SRB (Sigma Aldrich, Argentina, Cat# S1402), and analyzed for percent of survival on 96-well plate reader. The IC<sub>50</sub> (half maximal inhibitory concentration) value was calculated using GraphPad software.

## 5. X-Ray crystallography of **3y** (CCDC 2094077)

A single crystal of **3y** was obtained from EtOAc solvent at room temperature. Diffraction data were collected on Bruker CCD-APEX X-ray diffractometer. Refinement was carried out on F<sup>2</sup>.

**Table S1** Crystal data and structure refinement for **3y**

|                                   |                                                                                                  |
|-----------------------------------|--------------------------------------------------------------------------------------------------|
| Identification code               | cu_d8v19901_0m                                                                                   |
| Empirical formula                 | C <sub>19</sub> H <sub>17</sub> F N <sub>2</sub> O <sub>5</sub>                                  |
| Formula weight                    | 372.34                                                                                           |
| Temperature                       | 293(2) K                                                                                         |
| Wavelength                        | 1.54178 Å                                                                                        |
| Crystal system                    | Tetragonal                                                                                       |
| Space group                       | P 41                                                                                             |
| Unit cell dimensions              | a = 9.5302(3) Å      α = 90°.<br>b = 9.5302(3) Å      β = 90°.<br>c = 19.3236(5) Å      γ = 90°. |
| Volume                            | 1755.06(12) Å <sup>3</sup>                                                                       |
| Z                                 | 4                                                                                                |
| Density (calculated)              | 1.409 Mg/m <sup>3</sup>                                                                          |
| Absorption coefficient            | 0.931 mm <sup>-1</sup>                                                                           |
| F(000)                            | 776                                                                                              |
| Crystal size                      | 0.200 x 0.170 x 0.140 mm <sup>3</sup>                                                            |
| Theta range for data collection   | 4.640 to 67.489°.                                                                                |
| Index ranges                      | -10 ≤ h ≤ 9, -11 ≤ k ≤ 11, -23 ≤ l ≤ 22                                                          |
| Reflections collected             | 16115                                                                                            |
| Independent reflections           | 3121 [R(int) = 0.0372]                                                                           |
| Completeness to theta = 67.679°   | 98.4 %                                                                                           |
| Absorption correction             | Semi-empirical from equivalents                                                                  |
| Max. and min. transmission        | 0.7533 and 0.5199                                                                                |
| Refinement method                 | Full-matrix least-squares on F <sup>2</sup>                                                      |
| Data / restraints / parameters    | 3121 / 1 / 246                                                                                   |
| Goodness-of-fit on F <sup>2</sup> | 1.048                                                                                            |
| Final R indices [I > 2σ(I)]       | R1 = 0.0290, wR2 = 0.0713                                                                        |
| R indices (all data)              | R1 = 0.0307, wR2 = 0.0726                                                                        |
| Absolute structure parameter      | 0.03(7)                                                                                          |
| Extinction coefficient            | 0.021(2)                                                                                         |

Largest diff. peak and hole

0.090 and -0.098 e.Å<sup>-3</sup>**Table S2** bond lengths [Å] and angles [°] for **3y**

|              |          |                     |            |
|--------------|----------|---------------------|------------|
| F(1)-C(4)    | 1.356(3) | F(1)-C(4)-C(3)      | 118.3(2)   |
| O(1)-C(7)    | 1.207(3) | C(5)-C(4)-C(3)      | 122.3(2)   |
| O(2)-C(1)    | 1.370(3) | C(4)-C(5)-C(6)      | 118.7(2)   |
| O(2)-C(9)    | 1.434(3) | C(4)-C(5)-H(5)      | 120.6      |
| O(3)-C(11)   | 1.236(3) | C(6)-C(5)-H(5)      | 120.6      |
| O(4)-N(2)    | 1.208(3) | C(1)-C(6)-C(5)      | 119.1(2)   |
| O(5)-N(2)    | 1.200(3) | C(1)-C(6)-C(7)      | 120.5(2)   |
| N(1)-C(11)   | 1.333(3) | C(5)-C(6)-C(7)      | 120.2(2)   |
| N(1)-C(13)   | 1.449(3) | O(1)-C(7)-C(6)      | 124.2(2)   |
| N(1)-H(1)    | 0.8600   | O(1)-C(7)-C(8)      | 121.3(2)   |
| N(2)-C(8)    | 1.519(3) | C(6)-C(7)-C(8)      | 114.24(18) |
| C(1)-C(2)    | 1.382(3) | N(2)-C(8)-C(12)     | 110.5(2)   |
| C(1)-C(6)    | 1.392(3) | N(2)-C(8)-C(7)      | 106.47(19) |
| C(2)-C(3)    | 1.365(3) | C(12)-C(8)-C(7)     | 108.9(2)   |
| C(2)-H(2)    | 0.9300   | N(2)-C(8)-C(9)      | 106.6(2)   |
| C(3)-C(4)    | 1.378(3) | C(12)-C(8)-C(9)     | 114.1(2)   |
| C(3)-H(3)    | 0.9300   | C(7)-C(8)-C(9)      | 110.00(18) |
| C(4)-C(5)    | 1.359(4) | O(2)-C(9)-C(10)     | 105.80(18) |
| C(5)-C(6)    | 1.400(3) | O(2)-C(9)-C(8)      | 108.61(18) |
| C(5)-H(5)    | 0.9300   | C(10)-C(9)-C(8)     | 114.74(19) |
| C(6)-C(7)    | 1.470(3) | O(2)-C(9)-H(9)      | 109.2      |
| C(7)-C(8)    | 1.536(4) | C(10)-C(9)-H(9)     | 109.2      |
| C(8)-C(12)   | 1.520(3) | C(8)-C(9)-H(9)      | 109.2      |
| C(8)-C(9)    | 1.541(3) | C(11)-C(10)-C(9)    | 110.14(18) |
| C(9)-C(10)   | 1.512(3) | C(11)-C(10)-H(10A)  | 109.6      |
| C(9)-H(9)    | 0.9800   | C(9)-C(10)-H(10A)   | 109.6      |
| C(10)-C(11)  | 1.510(4) | C(11)-C(10)-H(10B)  | 109.6      |
| C(10)-H(10A) | 0.9700   | C(9)-C(10)-H(10B)   | 109.6      |
| C(10)-H(10B) | 0.9700   | H(10A)-C(10)-H(10B) | 108.1      |
| C(12)-H(12A) | 0.9600   | O(3)-C(11)-N(1)     | 123.2(2)   |
| C(12)-H(12B) | 0.9600   | O(3)-C(11)-C(10)    | 120.9(2)   |
| C(12)-H(12C) | 0.9600   | N(1)-C(11)-C(10)    | 115.8(2)   |
| C(13)-C(14)  | 1.506(4) | C(8)-C(12)-H(12A)   | 109.5      |
| C(13)-H(13A) | 0.9700   | C(8)-C(12)-H(12B)   | 109.5      |
| C(13)-H(13B) | 0.9700   | H(12A)-C(12)-H(12B) | 109.5      |
| C(14)-C(15)  | 1.380(4) | C(8)-C(12)-H(12C)   | 109.5      |
| C(14)-C(19)  | 1.388(4) | H(12A)-C(12)-H(12C) | 109.5      |
| C(15)-C(16)  | 1.383(4) | H(12B)-C(12)-H(12C) | 109.5      |
| C(15)-H(15)  | 0.9300   | N(1)-C(13)-C(14)    | 115.4(2)   |

|                  |            |                     |          |
|------------------|------------|---------------------|----------|
| C(16)-C(17)      | 1.367(5)   | N(1)-C(13)-H(13A)   | 108.4    |
| C(16)-H(16)      | 0.9300     | C(14)-C(13)-H(13A)  | 108.4    |
| C(17)-C(18)      | 1.374(5)   | N(1)-C(13)-H(13B)   | 108.4    |
| C(17)-H(17)      | 0.9300     | C(14)-C(13)-H(13B)  | 108.4    |
| C(18)-C(19)      | 1.374(5)   | H(13A)-C(13)-H(13B) | 107.5    |
| C(18)-H(18)      | 0.9300     | C(15)-C(14)-C(19)   | 117.8(3) |
| C(19)-H(19)      | 0.9300     | C(15)-C(14)-C(13)   | 123.4(2) |
| C(1)-O(2)-C(9)   | 115.87(16) | C(19)-C(14)-C(13)   | 118.8(2) |
| C(11)-N(1)-C(13) | 123.1(2)   | C(14)-C(15)-C(16)   | 121.1(3) |
| C(11)-N(1)-H(1)  | 118.5      | C(14)-C(15)-H(15)   | 119.5    |
| C(13)-N(1)-H(1)  | 118.5      | C(16)-C(15)-H(15)   | 119.5    |
| O(5)-N(2)-O(4)   | 123.4(3)   | C(17)-C(16)-C(15)   | 120.5(3) |
| O(5)-N(2)-C(8)   | 119.3(3)   | C(17)-C(16)-H(16)   | 119.8    |
| O(4)-N(2)-C(8)   | 117.4(2)   | C(15)-C(16)-H(16)   | 119.8    |
| O(2)-C(1)-C(2)   | 116.90(18) | C(16)-C(17)-C(18)   | 119.1(3) |
| O(2)-C(1)-C(6)   | 122.48(19) | C(16)-C(17)-H(17)   | 120.5    |
| C(2)-C(1)-C(6)   | 120.5(2)   | C(18)-C(17)-H(17)   | 120.5    |
| C(3)-C(2)-C(1)   | 119.8(2)   | C(19)-C(18)-C(17)   | 120.7(3) |
| C(3)-C(2)-H(2)   | 120.1      | C(19)-C(18)-H(18)   | 119.6    |
| C(1)-C(2)-H(2)   | 120.1      | C(17)-C(18)-H(18)   | 119.6    |
| C(2)-C(3)-C(4)   | 119.5(2)   | C(18)-C(19)-C(14)   | 120.9(3) |
| C(2)-C(3)-H(3)   | 120.2      | C(18)-C(19)-H(19)   | 119.6    |
| C(4)-C(3)-H(3)   | 120.2      | C(14)-C(19)-H(19)   | 119.6    |
| F(1)-C(4)-C(5)   | 119.4(2)   |                     |          |

---

Symmetry transformations used to generate equivalent atoms.

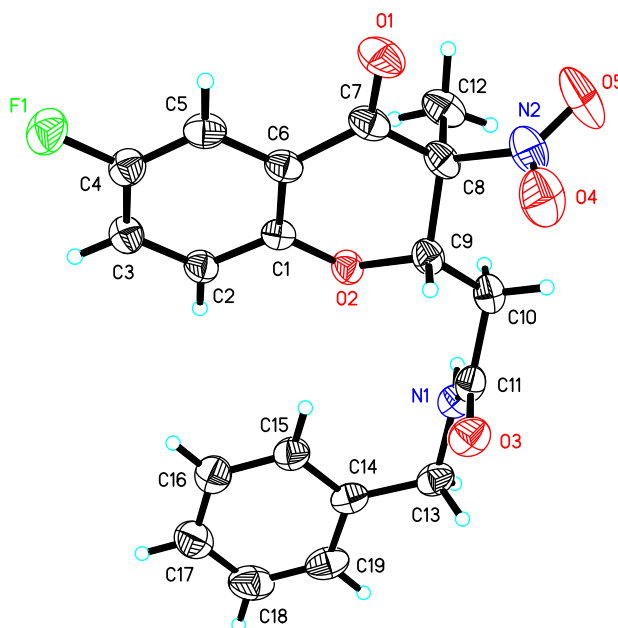

**Figure S1** Molecular structure of **3y**.

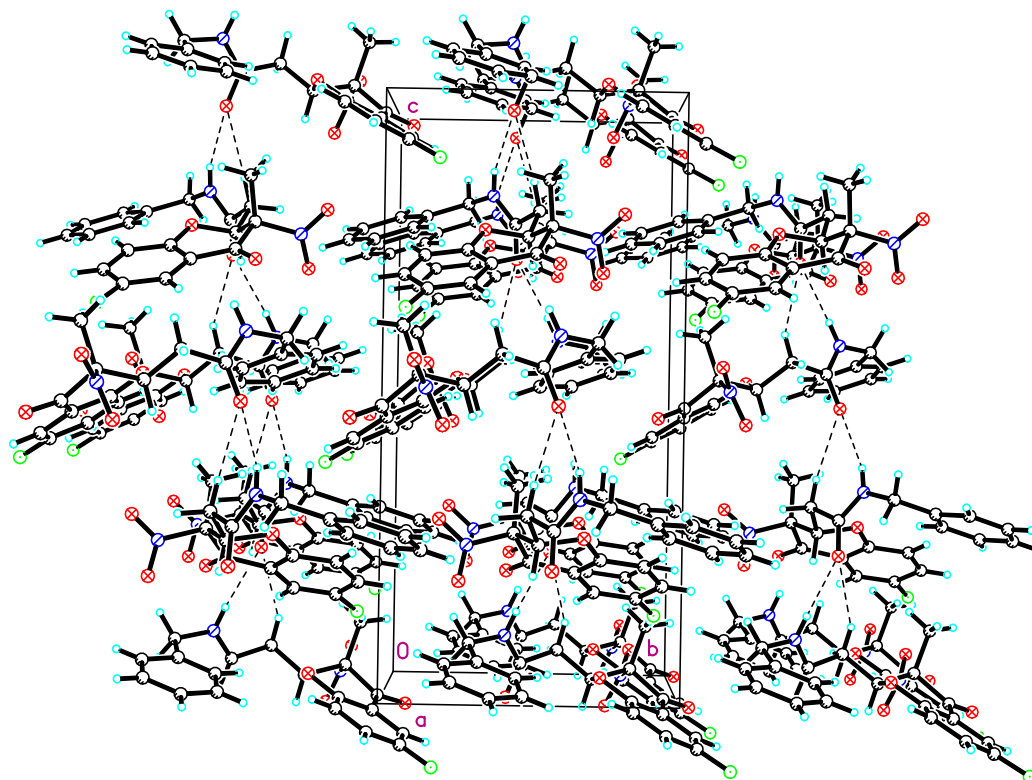

**Figure S2** Unit cell molecular packing arrangement of **3y**.

## 6. Chiral HPLC charts

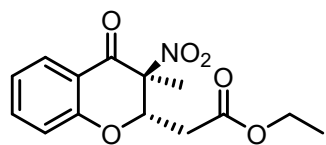

**2a**

<色谱图>

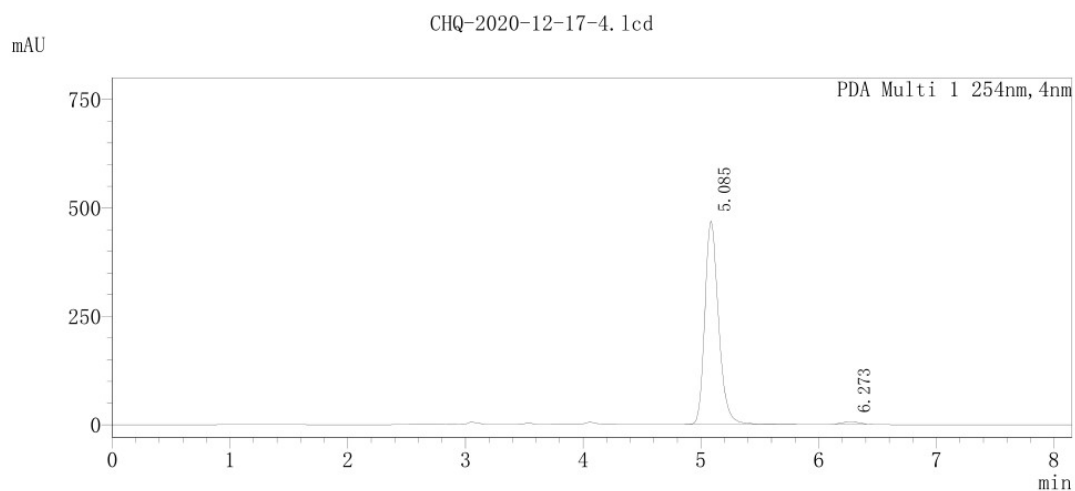

<峰表>

CHQ-2020-12-17-4. lcd

PDA Ch1 254nm

| 峰号 | 保留时间  | 面积      | 高度     | 面积%     | 高度%     |
|----|-------|---------|--------|---------|---------|
| 1  | 5.085 | 3827164 | 470050 | 98.806  | 98.923  |
| 2  | 6.273 | 46258   | 5119   | 1.194   | 1.077   |
| 总计 |       | 3873423 | 475169 | 100.000 | 100.000 |

<色谱图>

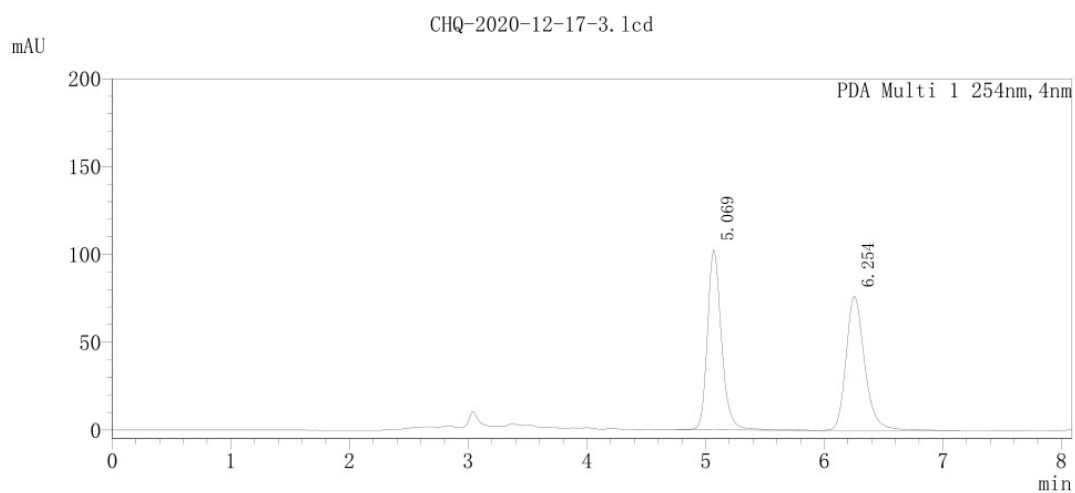

<峰表>

CHQ-2020-12-17-3. lcd

PDA Ch1 254nm

| 峰号 | 保留时间  | 面积      | 高度     | 面积%     | 高度%     |
|----|-------|---------|--------|---------|---------|
| 1  | 5.069 | 853485  | 102590 | 50.651  | 57.368  |
| 2  | 6.254 | 831534  | 76239  | 49.349  | 42.632  |
| 总计 |       | 1685018 | 178829 | 100.000 | 100.000 |



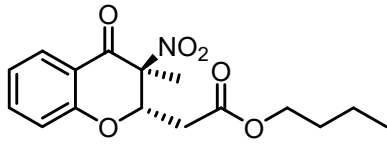

**2b**

<色谱图>

mAU

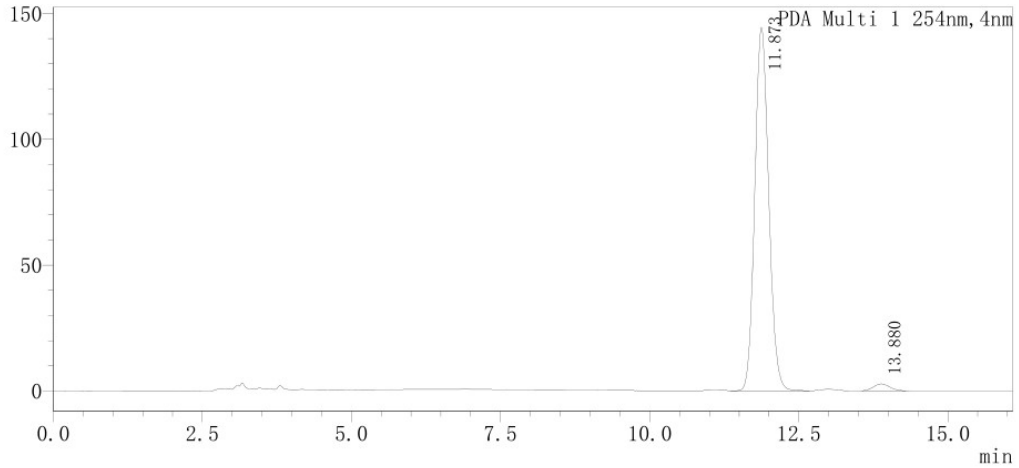

<峰表>

CHQ-2021-1-20-2.lcd

PDA Ch1 254nm

| 峰号 | 保留时间   | 面积      | 高度     | 面积%     | 高度%     |
|----|--------|---------|--------|---------|---------|
| 1  | 11.873 | 2346545 | 144271 | 97.877  | 98.150  |
| 2  | 13.880 | 50893   | 2719   | 2.123   | 1.850   |
| 总计 |        | 2397438 | 146989 | 100.000 | 100.000 |

<色谱图>

CHQ-2021-1-20-1-1.lcd

mAU

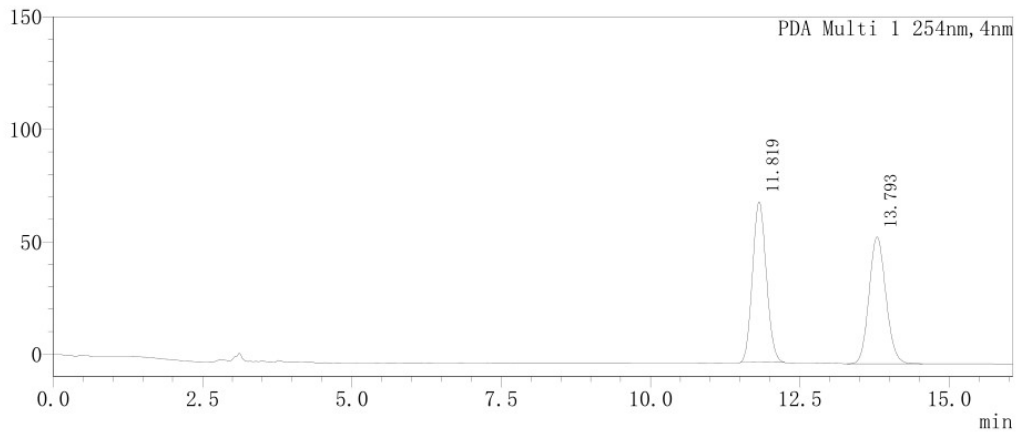

<峰表>

CHQ-2021-1-20-1-1.lcd

PDA Ch1 254nm

| 峰号 | 保留时间   | 面积      | 高度     | 面积%     | 高度%     |
|----|--------|---------|--------|---------|---------|
| 1  | 11.819 | 1151212 | 71456  | 50.940  | 55.876  |
| 2  | 13.793 | 1108717 | 56427  | 49.060  | 44.124  |
| 总计 |        | 2259929 | 127883 | 100.000 | 100.000 |

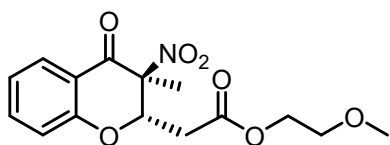

**2c**

<色谱图>

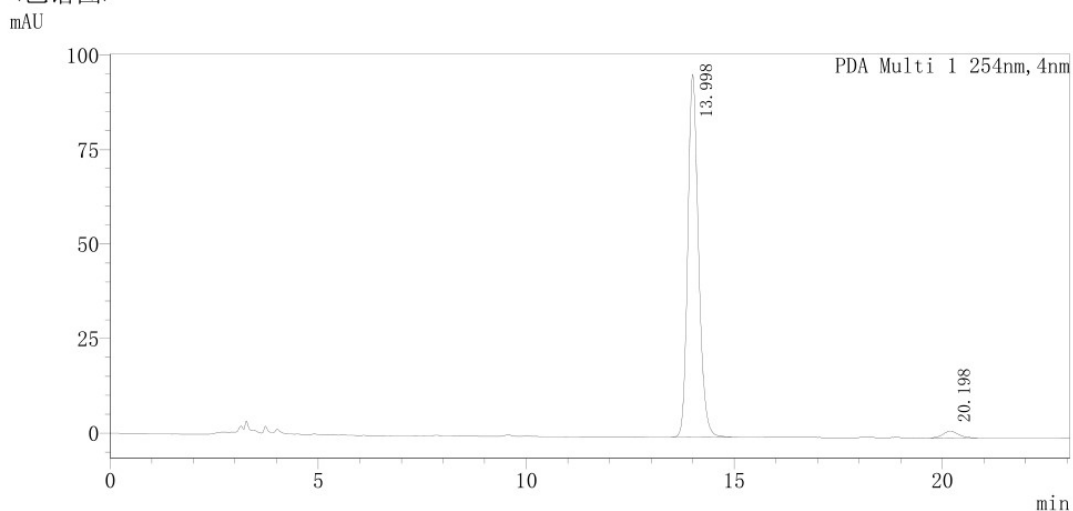

<峰表>

CHQ-2020-12-29-2. lcd

PDA Ch1 254nm

| 峰号 | 保留时间   | 面积      | 高度    | 面积%     | 高度%     |
|----|--------|---------|-------|---------|---------|
| 1  | 13.998 | 1711144 | 95939 | 97.474  | 98.210  |
| 2  | 20.198 | 44343   | 1749  | 2.526   | 1.790   |
| 总计 |        | 1755487 | 97688 | 100.000 | 100.000 |

<色谱图>

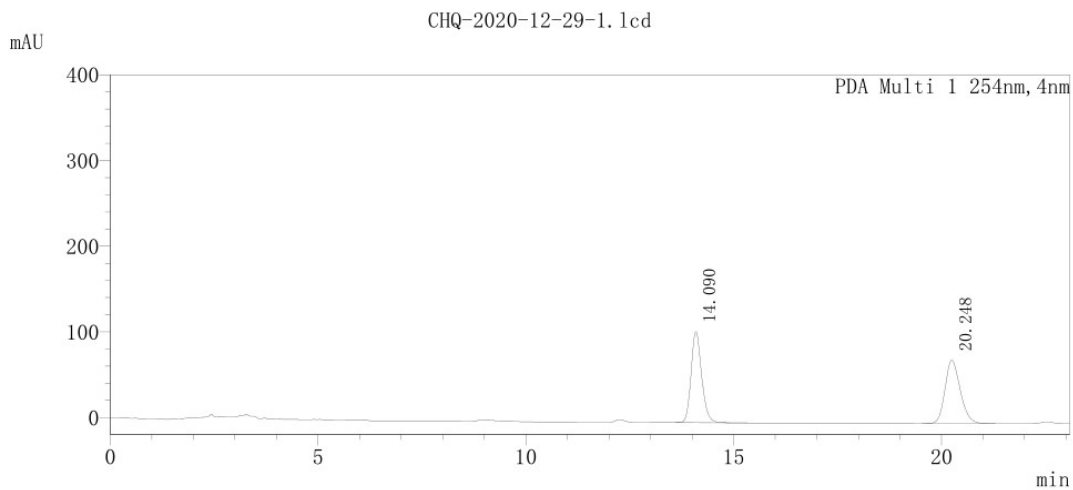

<峰表>

CHQ-2020-12-29-1. lcd

PDA Ch1 254nm

| 峰号 | 保留时间   | 面积      | 高度     | 面积%     | 高度%     |
|----|--------|---------|--------|---------|---------|
| 1  | 14.090 | 1885190 | 106320 | 49.952  | 58.949  |
| 2  | 20.248 | 1888826 | 74039  | 50.048  | 41.051  |
| 总计 |        | 3774016 | 180359 | 100.000 | 100.000 |

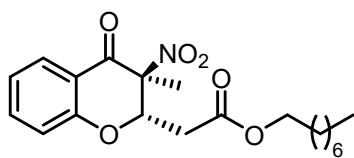

**2d**

<色谱图>

mAU

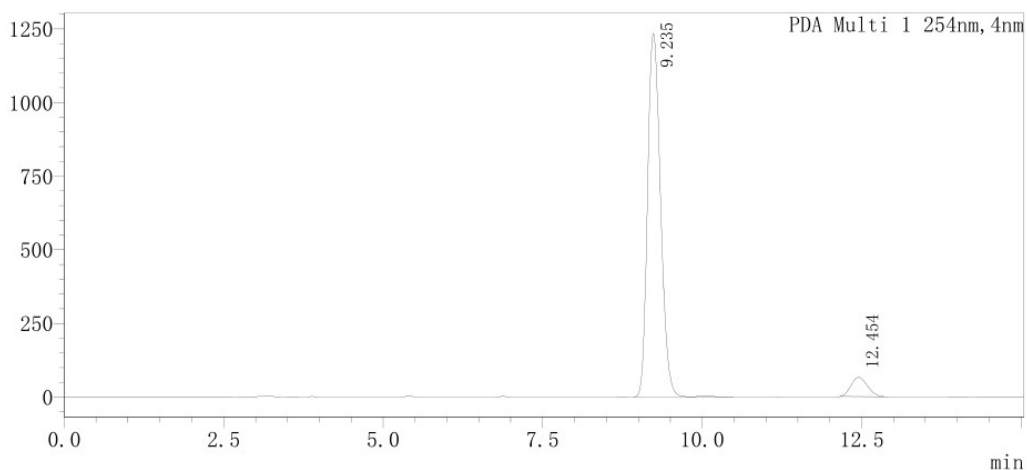

<峰表>

CHQ-2021-1-24-6.1cd

PDA Ch1 254nm

| 峰号 | 保留时间   | 面积       | 高度      | 面积%     | 高度%     |
|----|--------|----------|---------|---------|---------|
| 1  | 9.235  | 17534331 | 1234034 | 93.778  | 94.994  |
| 2  | 12.454 | 1163275  | 65036   | 6.222   | 5.006   |
| 总计 |        | 18697606 | 1299070 | 100.000 | 100.000 |

<色谱图>

mAU

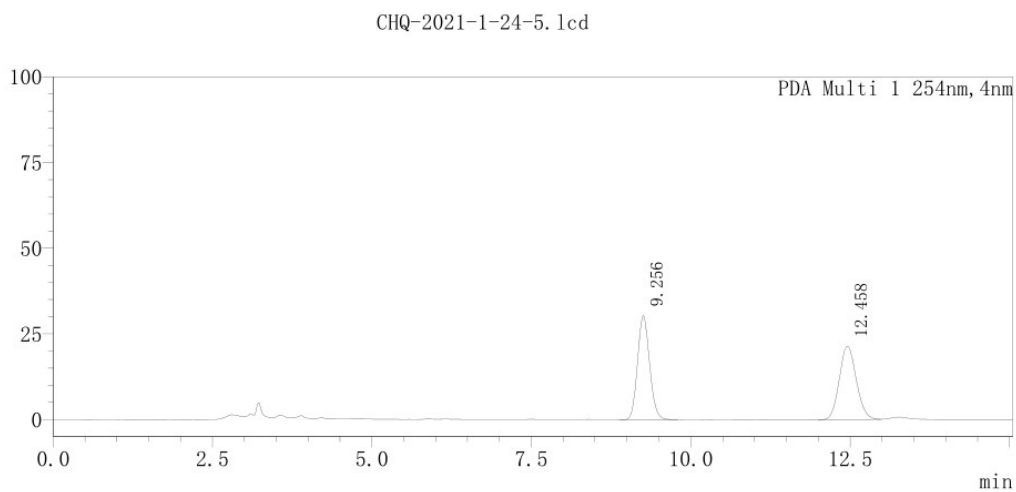

<峰表>

CHQ-2021-1-24-5.1cd

PDA Ch1 254nm

| 峰号 | 保留时间   | 面积     | 高度    | 面积%     | 高度%     |
|----|--------|--------|-------|---------|---------|
| 1  | 9.256  | 400090 | 30416 | 50.261  | 58.636  |
| 2  | 12.458 | 395936 | 21456 | 49.739  | 41.364  |
| 总计 |        | 796026 | 51872 | 100.000 | 100.000 |

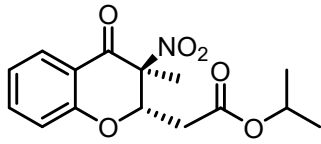

**2e**

<色谱图>

mAU

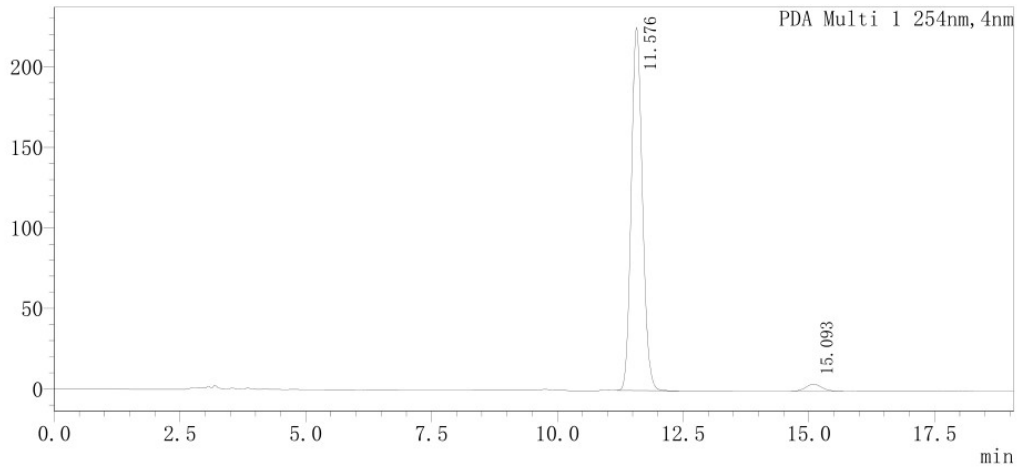

<峰表>

CHQ-2021-1-3-2.1cd

PDA Ch1 254nm

| 峰号 | 保留时间   | 面积      | 高度     | 面积%     | 高度%     |
|----|--------|---------|--------|---------|---------|
| 1  | 11.576 | 3500285 | 225319 | 97.452  | 98.125  |
| 2  | 15.093 | 91529   | 4305   | 2.548   | 1.875   |
| 总计 |        | 3591815 | 229623 | 100.000 | 100.000 |

<色谱图>

mAU

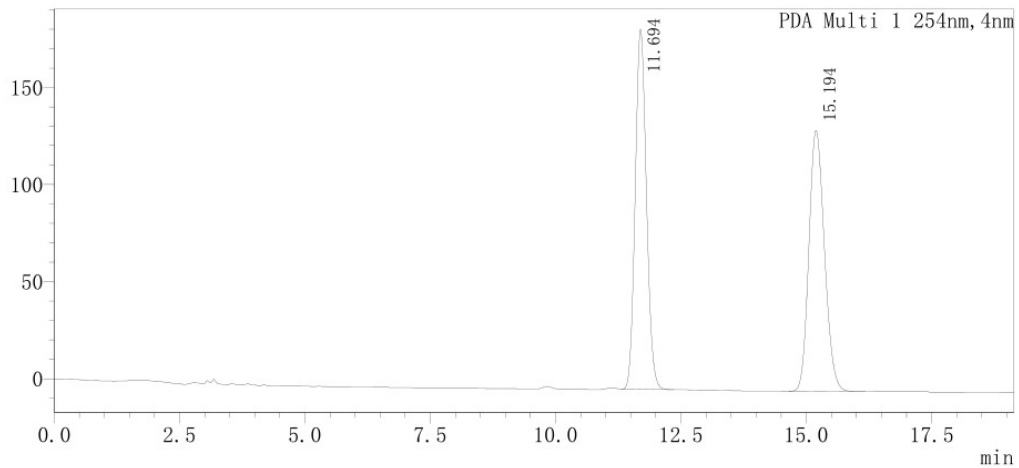

<峰表>

CHQ-2021-1-3-1.1cd

PDA Ch1 254nm

| 峰号 | 保留时间   | 面积      | 高度     | 面积%     | 高度%     |
|----|--------|---------|--------|---------|---------|
| 1  | 11.694 | 2903013 | 185437 | 49.876  | 57.972  |
| 2  | 15.194 | 2917436 | 134436 | 50.124  | 42.028  |
| 总计 |        | 5820450 | 319872 | 100.000 | 100.000 |

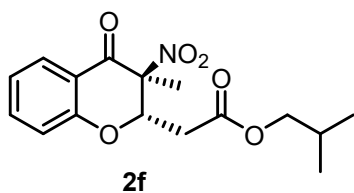

<色谱图>

mAU

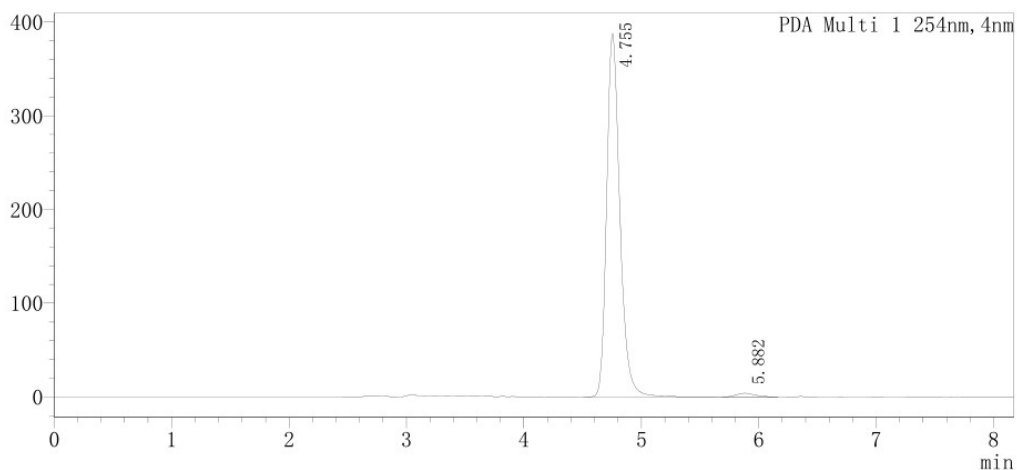

<峰表>

CHQ-2020-11-21-4. lcd

PDA Ch1 254nm

| 峰号 | 保留时间  | 面积      | 高度     | 面积%     | 高度%     |
|----|-------|---------|--------|---------|---------|
| 1  | 4.755 | 3037562 | 387549 | 98.613  | 99.001  |
| 2  | 5.882 | 42709   | 3910   | 1.387   | 0.999   |
| 总计 |       | 3080271 | 391458 | 100.000 | 100.000 |

<色谱图>

CHQ-2020-11-21-2. lcd

mAU

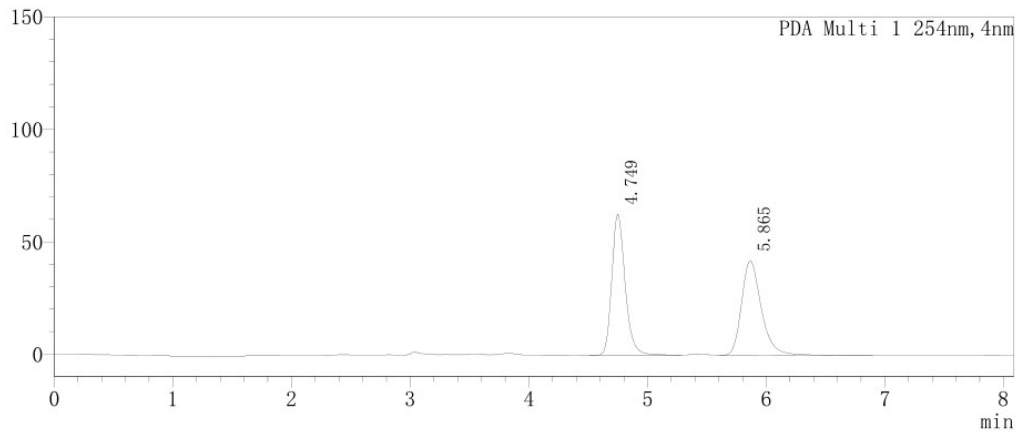

<峰表>

CHQ-2020-11-21-2. lcd

PDA Ch1 254nm

| 峰号 | 保留时间  | 面积     | 高度     | 面积%     |
|----|-------|--------|--------|---------|
| 1  | 4.749 | 493081 | 62821  | 50.236  |
| 2  | 5.865 | 488446 | 42141  | 49.764  |
| 总计 |       | 981526 | 104962 | 100.000 |

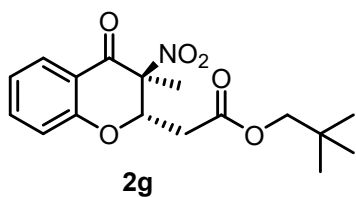

<色谱图>

mAU

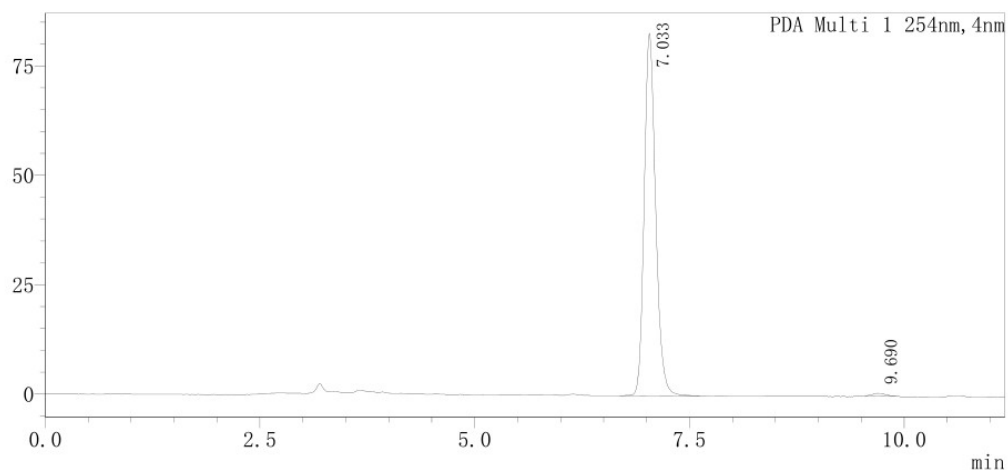

<峰表>

CHQ-2020-12-5-5.lcd

PDA Ch1 254nm

| 峰号 | 保留时间  | 面积     | 高度    | 面积%     | 高度%     |
|----|-------|--------|-------|---------|---------|
| 1  | 7.033 | 765928 | 82781 | 99.059  | 99.218  |
| 2  | 9.690 | 7272   | 653   | 0.941   | 0.782   |
| 总计 |       | 773200 | 83434 | 100.000 | 100.000 |

<色谱图>

CHQ-2020-12-9-3.lcd

mAU

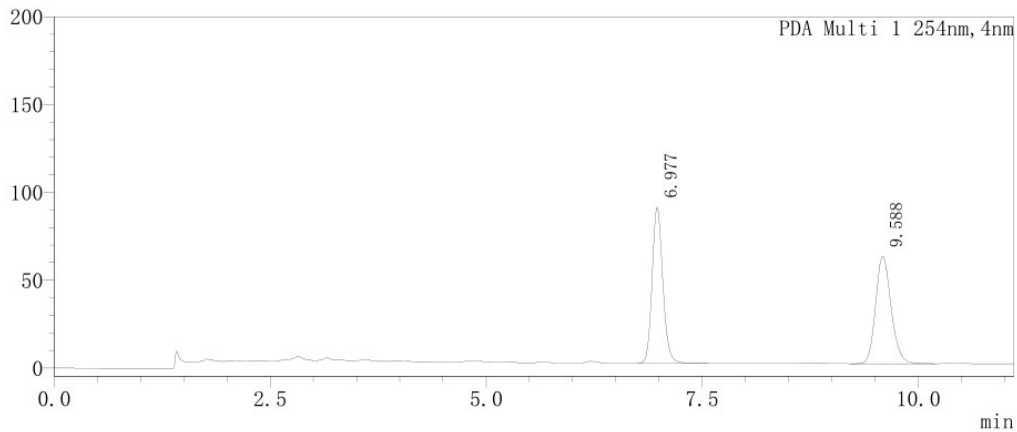

<峰表>

CHQ-2020-12-9-3.lcd

PDA Ch1 254nm

| 峰号 | 保留时间  | 面积      | 高度     | 面积%     | 高度%     |
|----|-------|---------|--------|---------|---------|
| 1  | 6.977 | 766631  | 89010  | 49.987  | 59.245  |
| 2  | 9.588 | 767035  | 61230  | 50.013  | 40.755  |
| 总计 |       | 1533665 | 150240 | 100.000 | 100.000 |

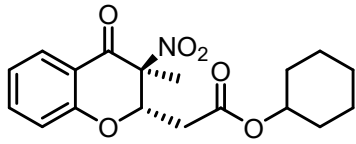

**2h**

<色谱图>

mAU

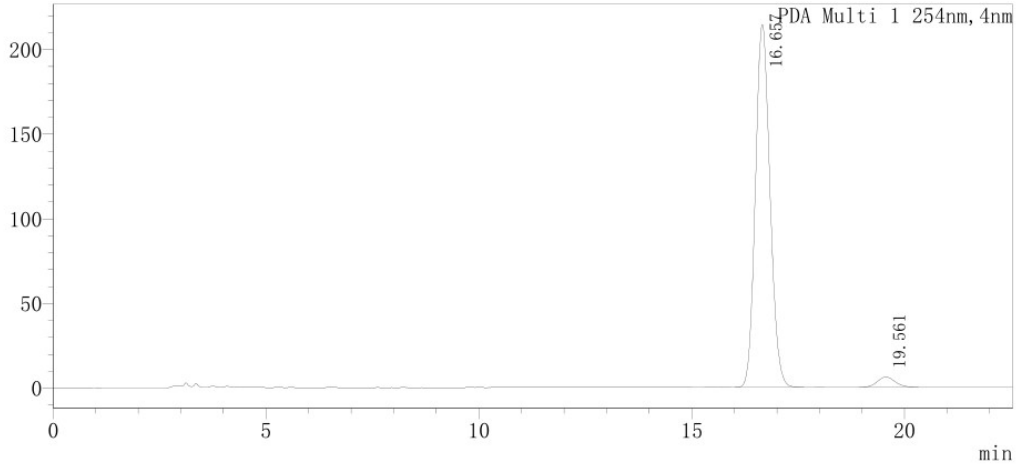

<峰表>

CHQ-2021-1-20-4. lcd

PDA Ch1 254nm

| 峰号 | 保留时间   | 面积      | 高度     | 面积%     | 高度%     |
|----|--------|---------|--------|---------|---------|
| 1  | 16.657 | 5118821 | 214327 | 96.689  | 97.254  |
| 2  | 19.561 | 175288  | 6052   | 3.311   | 2.746   |
| 总计 |        | 5294109 | 220379 | 100.000 | 100.000 |

<色谱图>

CHQ-2021-1-20-3-1. lcd

mAU

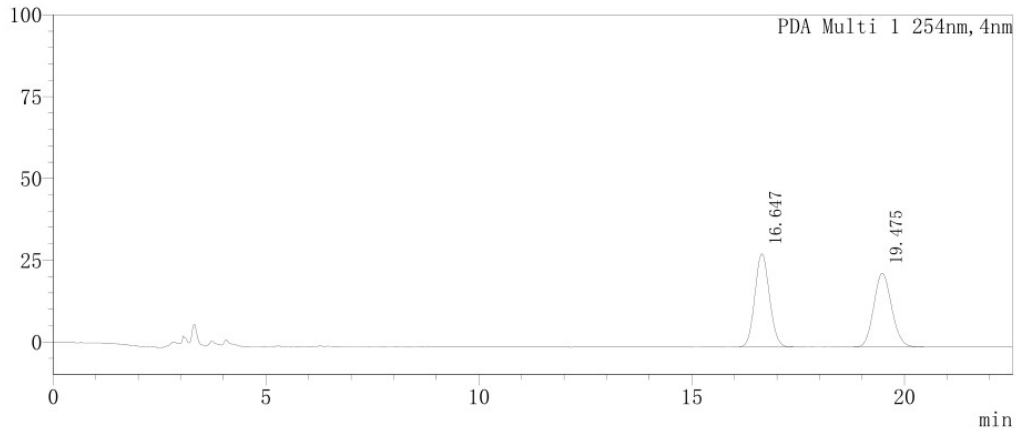

<峰表>

CHQ-2021-1-20-3-1. lcd

PDA Ch1 254nm

| 峰号 | 保留时间   | 面积      | 高度    | 面积%     | 高度%     |
|----|--------|---------|-------|---------|---------|
| 1  | 16.647 | 677751  | 28429 | 50.560  | 55.708  |
| 2  | 19.475 | 662742  | 22603 | 49.440  | 44.292  |
| 总计 |        | 1340493 | 51032 | 100.000 | 100.000 |

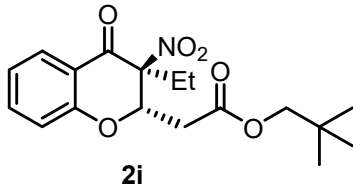

<色谱图>

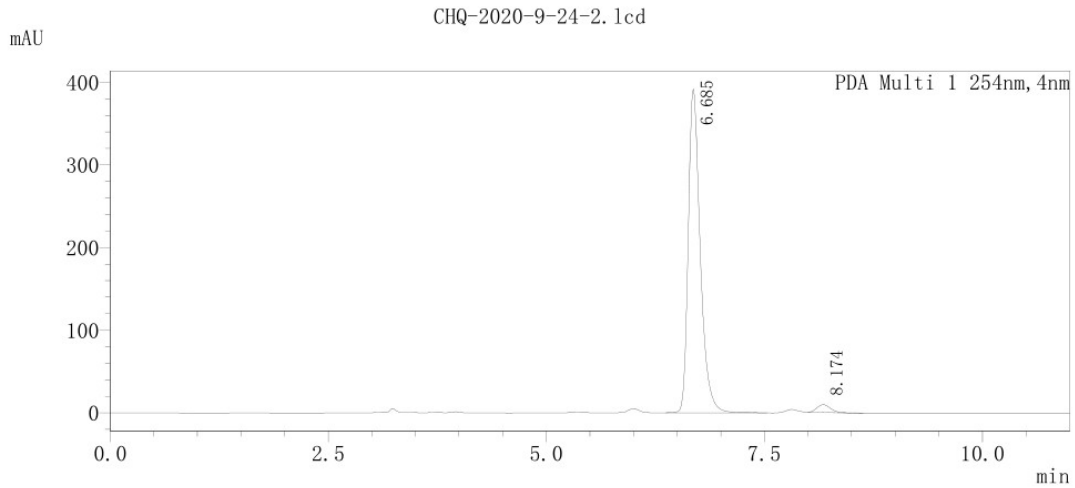

<峰表>

CHQ-2020-9-24-2.lcd

PDA Ch1 254nm

| 峰号 | 保留时间  | 面积      | 高度     | 面积%     | 高度%     |
|----|-------|---------|--------|---------|---------|
| 1  | 6.685 | 3752265 | 391660 | 97.342  | 97.650  |
| 2  | 8.174 | 102466  | 9424   | 2.658   | 2.350   |
| 总计 |       | 3854730 | 401084 | 100.000 | 100.000 |

<色谱图>

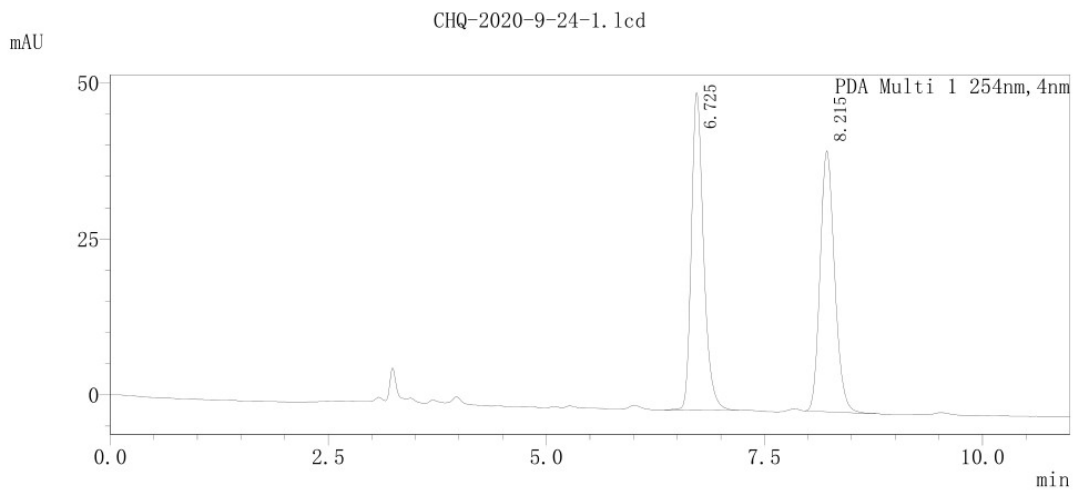

<峰表>

CHQ-2020-9-24-1.lcd

PDA Ch1 254nm

| 峰号 | 保留时间  | 面积     | 高度    | 面积%     | 高度%     |
|----|-------|--------|-------|---------|---------|
| 1  | 6.725 | 494950 | 50870 | 50.525  | 54.850  |
| 2  | 8.215 | 484656 | 41874 | 49.475  | 45.150  |
| 总计 |       | 979606 | 92744 | 100.000 | 100.000 |



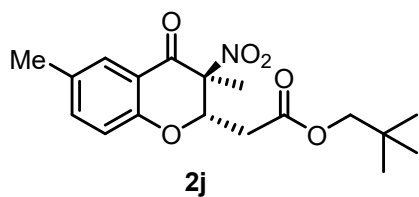

<色谱图>

mAU

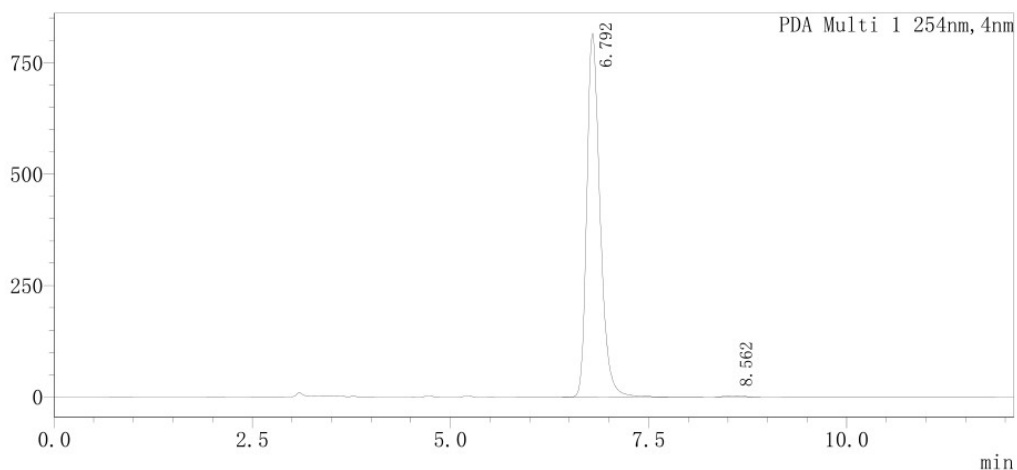

<峰表>

CHQ-2020-11-26-3. lcd

PDA Ch1 254nm

| 峰号 | 保留时间  | 面积      | 高度     | 面积%     | 高度%     |
|----|-------|---------|--------|---------|---------|
| 1  | 6.792 | 9536222 | 815636 | 99.543  | 99.657  |
| 2  | 8.562 | 43816   | 2810   | 0.457   | 0.343   |
| 总计 |       | 9580038 | 818447 | 100.000 | 100.000 |

<色谱图>

mAU

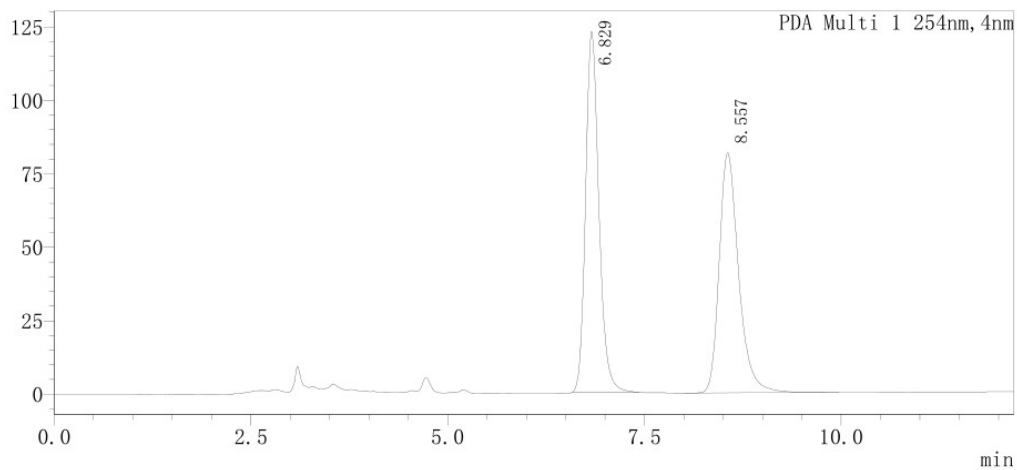

<峰表>

CHQ-2020-11-26-1-2. lcd

PDA Ch1 254nm

| 峰号 | 保留时间  | 面积      | 高度     | 面积%     | 高度%     |
|----|-------|---------|--------|---------|---------|
| 1  | 6.829 | 1449115 | 122878 | 50.771  | 60.038  |
| 2  | 8.557 | 1405114 | 81789  | 49.229  | 39.962  |
| 总计 |       | 2854229 | 204667 | 100.000 | 100.000 |

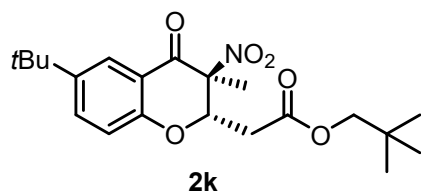

<色谱图>

mAU

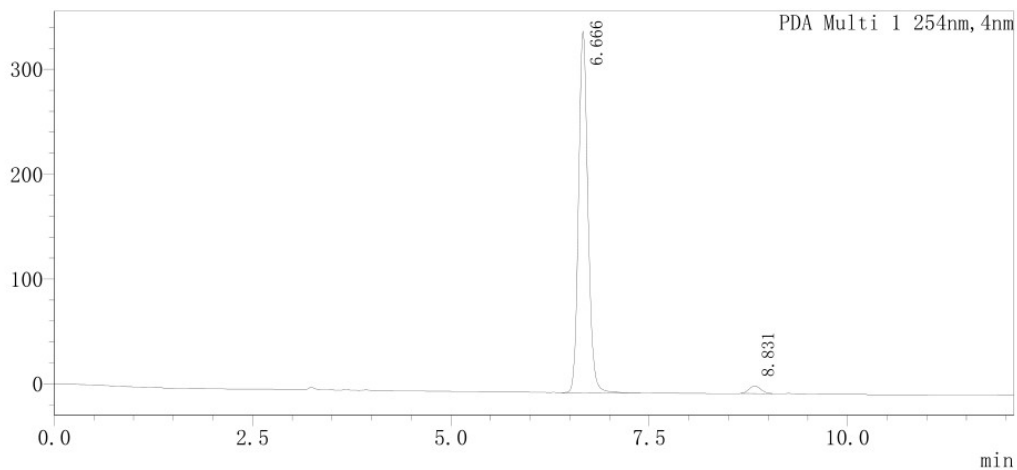

<峰表>

CHQ-2020-10-8-1.lcd

PDA Ch1 254nm

| 峰号 | 保留时间  | 面积      | 高度     | 面积%     | 高度%     |
|----|-------|---------|--------|---------|---------|
| 1  | 6.666 | 2836521 | 344439 | 97.449  | 97.956  |
| 2  | 8.831 | 74268   | 7188   | 2.551   | 2.044   |
| 总计 |       | 2910789 | 351627 | 100.000 | 100.000 |

<色谱图>

mAU

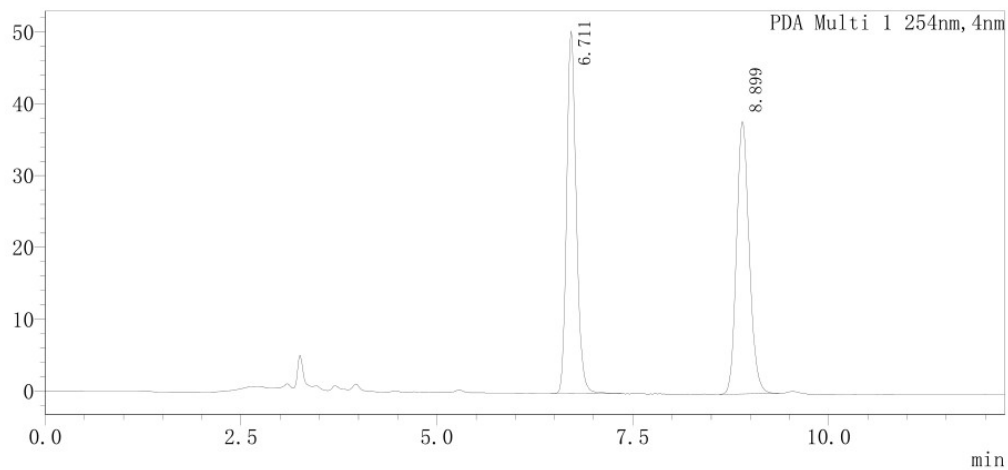

<峰表>

CHQ-2020-9-21-6.lcd

PDA Ch1 254nm

| 峰号 | 保留时间  | 面积     | 高度    | 面积%     | 高度%     |
|----|-------|--------|-------|---------|---------|
| 1  | 6.711 | 430030 | 50451 | 50.173  | 57.089  |
| 2  | 8.899 | 427067 | 37922 | 49.827  | 42.911  |
| 总计 |       | 857097 | 88372 | 100.000 | 100.000 |

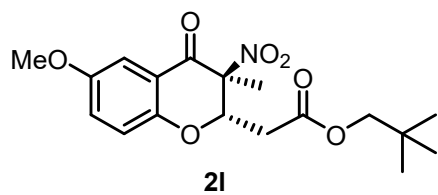

<色谱图>

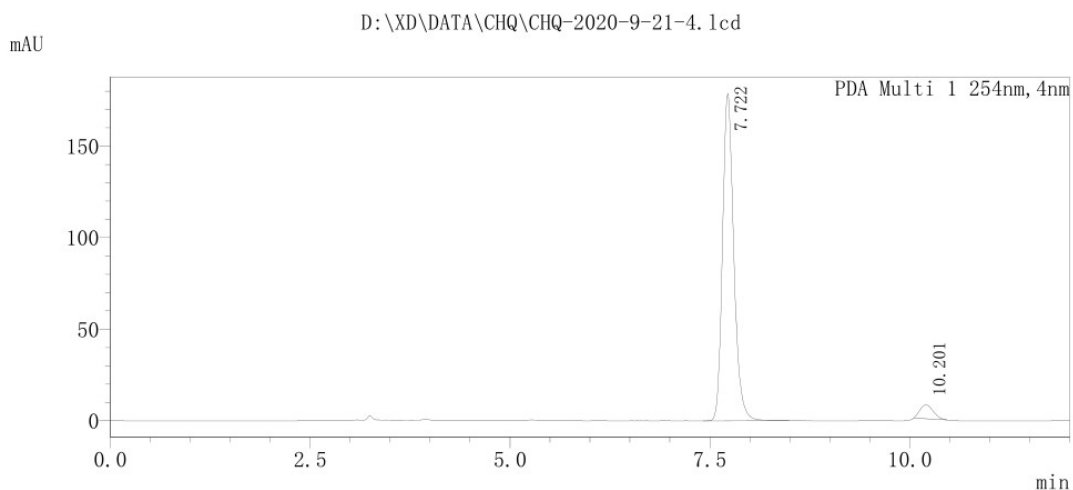

<峰表>

CHQ-2020-9-21-4. lcd

PDA Ch1 254nm

| 峰号 | 保留时间   | 面积      | 高度     | 面积%     | 高度%     |
|----|--------|---------|--------|---------|---------|
| 1  | 7.722  | 1752456 | 178835 | 95.149  | 95.895  |
| 2  | 10.201 | 89346   | 7655   | 4.851   | 4.105   |
| 总计 |        | 1841802 | 186490 | 100.000 | 100.000 |

<色谱图>

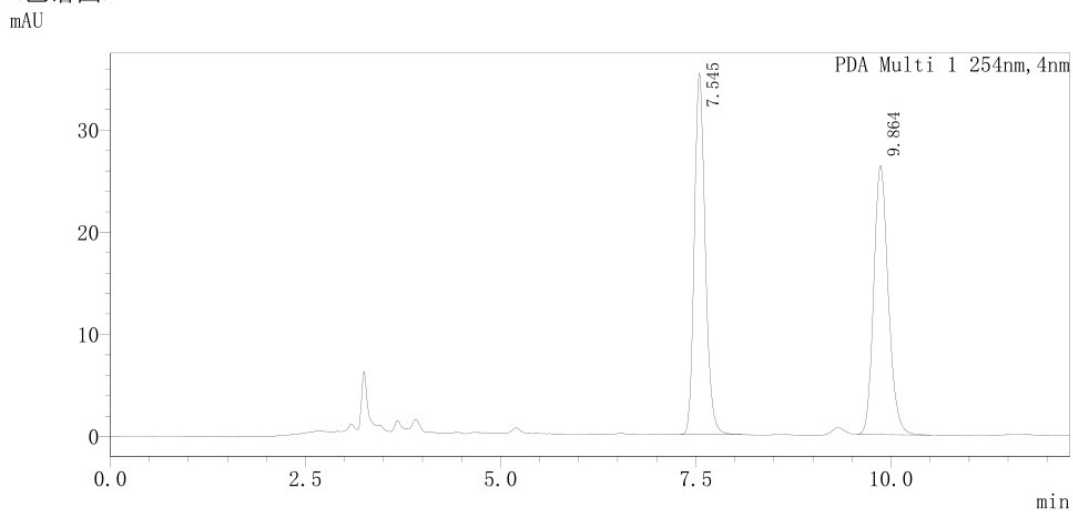

<峰表>

CHQ-2020-9-21-8. lcd

PDA Ch1 254nm

| 峰号 | 保留时间  | 面积     | 高度    | 面积%     | 高度%     |
|----|-------|--------|-------|---------|---------|
| 1  | 7.545 | 344153 | 35375 | 50.150  | 57.288  |
| 2  | 9.864 | 342091 | 26374 | 49.850  | 42.712  |
| 总计 |       | 686244 | 61750 | 100.000 | 100.000 |

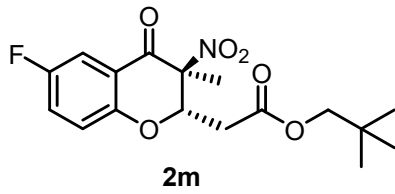

<色谱图>

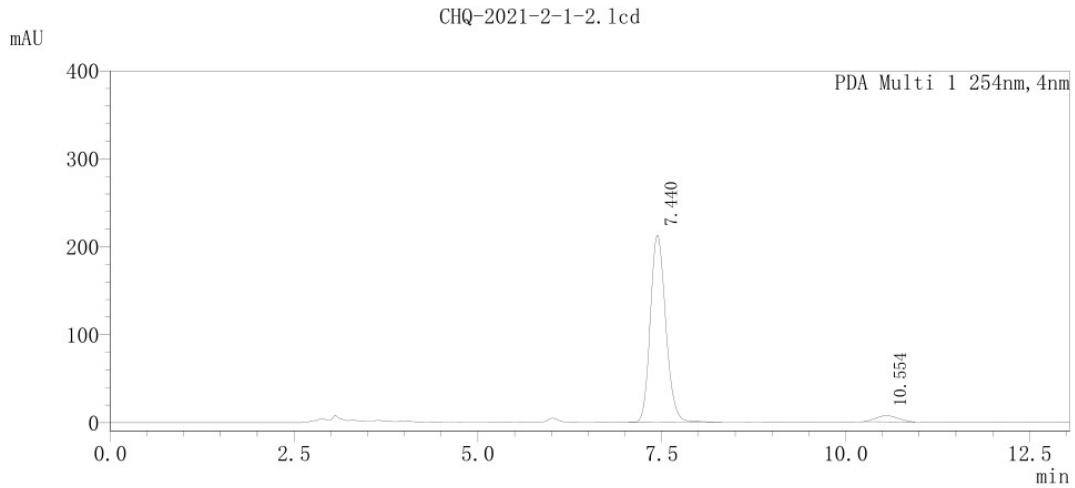

<峰表>

CHQ-2021-2-1-2. 1cd

PDA Ch1 254nm

| 峰号 | 保留时间   | 面积      | 高度     | 面积%     | 高度%     |
|----|--------|---------|--------|---------|---------|
| 1  | 7.440  | 3114362 | 212848 | 95.442  | 96.797  |
| 2  | 10.554 | 148727  | 7043   | 4.558   | 3.203   |
| 总计 |        | 3263089 | 219891 | 100.000 | 100.000 |

<色谱图>

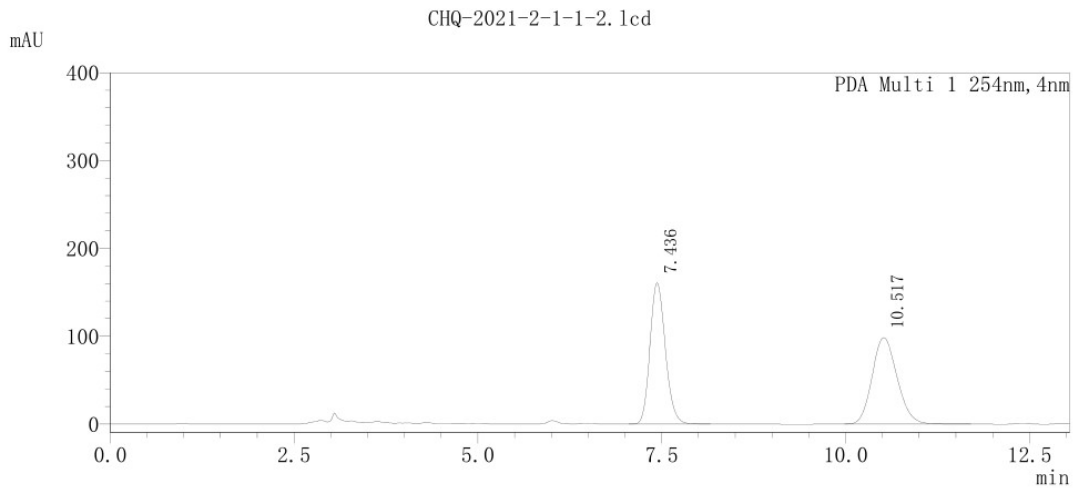

<峰表>

CHQ-2021-2-1-1-2. 1cd

PDA Ch1 254nm

| 峰号 | 保留时间   | 面积      | 高度     | 面积%     | 高度%     |
|----|--------|---------|--------|---------|---------|
| 1  | 7.436  | 2346743 | 161022 | 50.199  | 62.021  |
| 2  | 10.517 | 2328107 | 98601  | 49.801  | 37.979  |
| 总计 |        | 4674849 | 259623 | 100.000 | 100.000 |

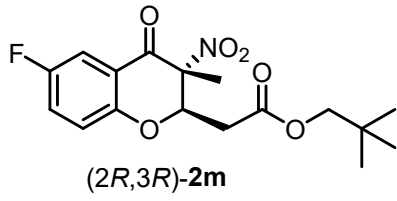

<色谱图>

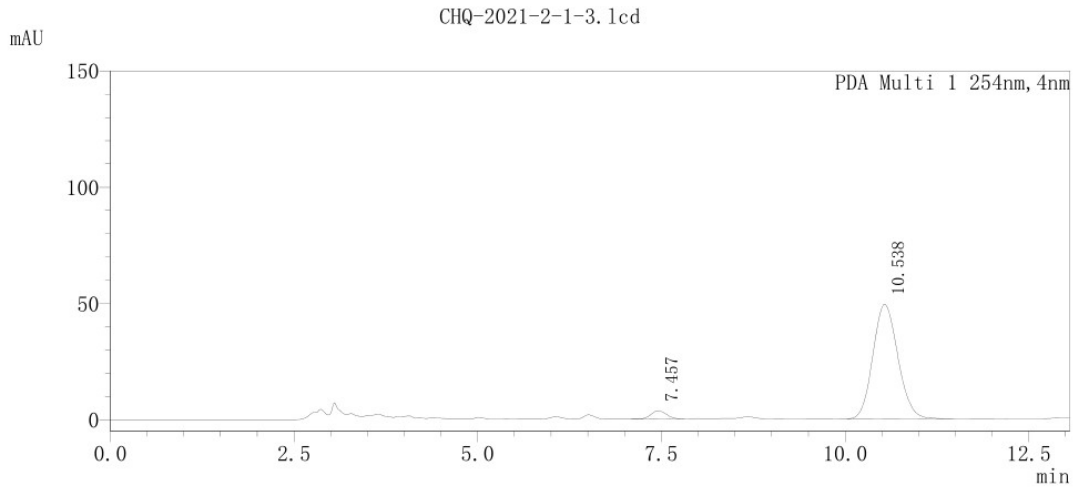

<峰表>

CHQ-2021-2-1-3. 1cd

PDA Ch1 254nm

| 峰号 | 保留时间   | 面积      | 高度    | 面积%     | 高度%     |
|----|--------|---------|-------|---------|---------|
| 1  | 7.457  | 53693   | 3599  | 4.388   | 6.797   |
| 2  | 10.538 | 1169836 | 49343 | 95.612  | 93.203  |
| 总计 |        | 1223529 | 52942 | 100.000 | 100.000 |

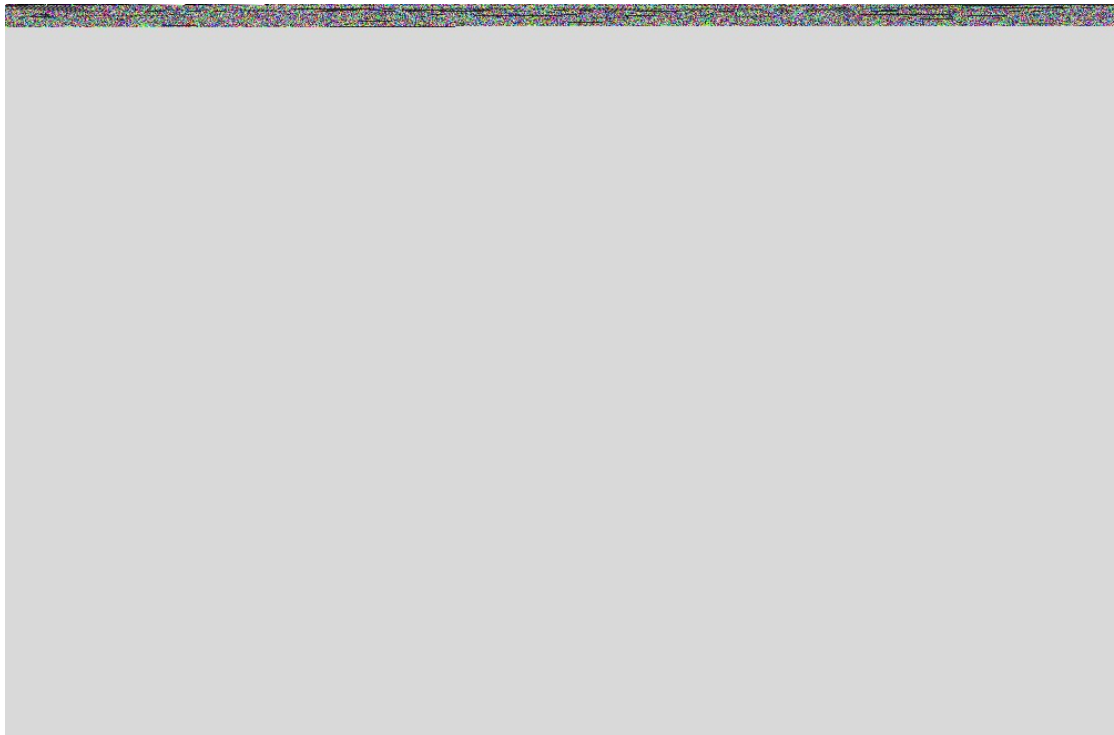

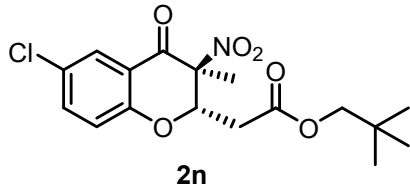

<色谱图>

mAU

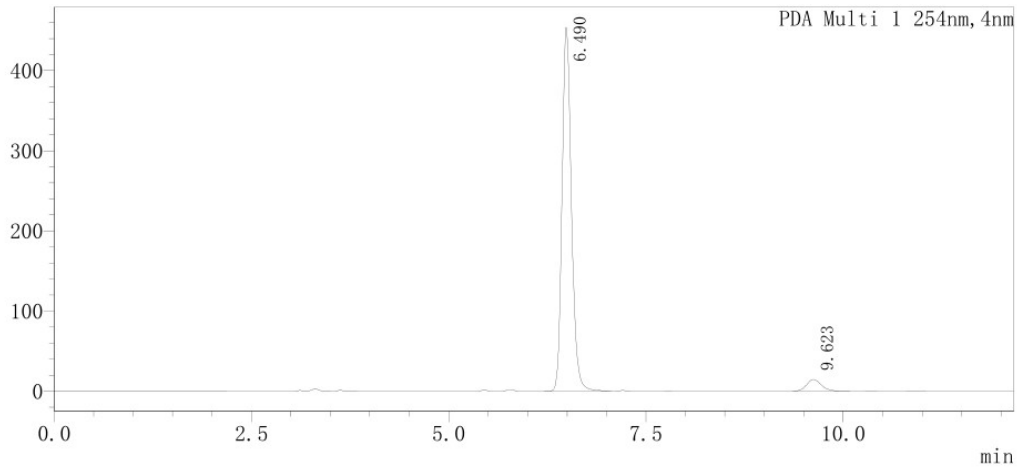

<峰表>

CHQ-2020-10-14-3. lcd

PDA Ch1 254nm

| 峰号 | 保留时间  | 面积      | 高度     | 面积%     | 高度%     |
|----|-------|---------|--------|---------|---------|
| 1  | 6.490 | 3761093 | 453673 | 95.375  | 96.935  |
| 2  | 9.623 | 182396  | 14344  | 4.625   | 3.065   |
| 总计 |       | 3943489 | 468017 | 100.000 | 100.000 |

<色谱图>

mAU

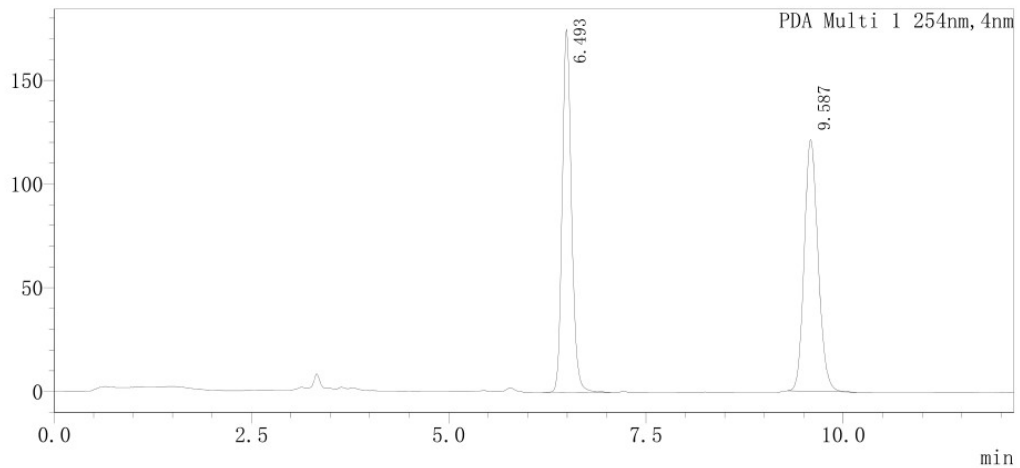

<峰表>

CHQ-2020-10-14-1. lcd

PDA Ch1 254nm

| 峰号 | 保留时间  | 面积      | 高度     | 面积%     | 高度%     |
|----|-------|---------|--------|---------|---------|
| 1  | 6.493 | 1435278 | 174936 | 49.275  | 59.053  |
| 2  | 9.587 | 1477523 | 121297 | 50.725  | 40.947  |
| 总计 |       | 2912801 | 296234 | 100.000 | 100.000 |

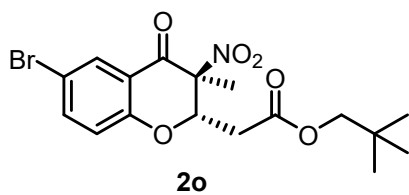

<色谱图>

mAU

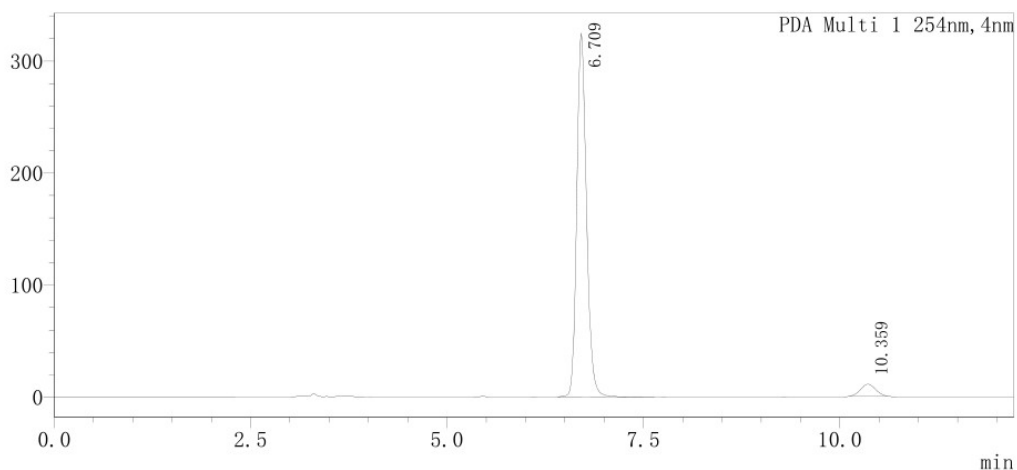

<峰表>

CHQ-2020-10-14-4. lcd

PDA Ch1 254nm

| 峰号 | 保留时间   | 面积      | 高度     | 面积%     | 高度%     |
|----|--------|---------|--------|---------|---------|
| 1  | 6.709  | 2795850 | 324413 | 95.160  | 96.799  |
| 2  | 10.359 | 142205  | 10727  | 4.840   | 3.201   |
| 总计 |        | 2938056 | 335140 | 100.000 | 100.000 |

<色谱图>

mAU

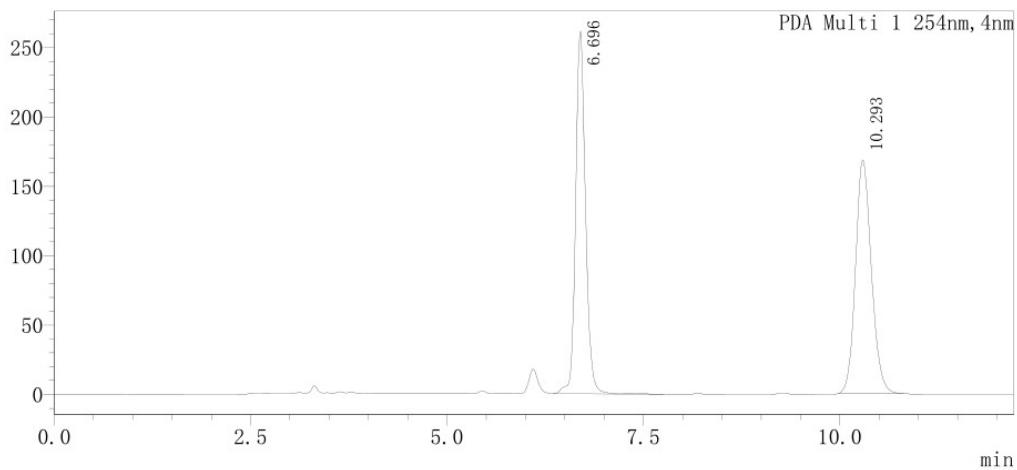

<峰表>

CHQ-2020-10-14-2. lcd

PDA Ch1 254nm

| 峰号 | 保留时间   | 面积      | 高度     | 面积%     | 高度%     |
|----|--------|---------|--------|---------|---------|
| 1  | 6.696  | 2286378 | 261079 | 49.150  | 60.799  |
| 2  | 10.293 | 2365450 | 168332 | 50.850  | 39.201  |
| 总计 |        | 4651829 | 429411 | 100.000 | 100.000 |

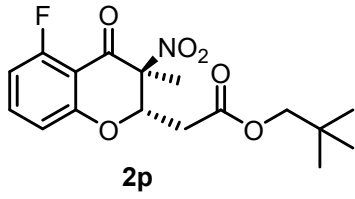

<色谱图>

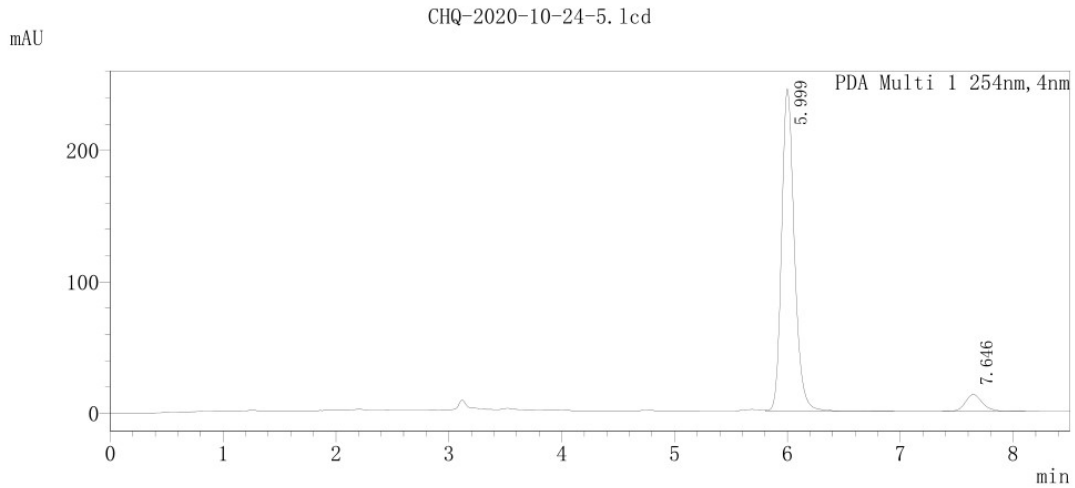

<峰表>

CHQ-2020-10-24-5. lcd

PDA Ch1 254nm

| 峰号 | 保留时间  | 面积      | 高度     | 面积%     | 高度%     |
|----|-------|---------|--------|---------|---------|
| 1  | 5.999 | 1923111 | 245098 | 93.557  | 95.061  |
| 2  | 7.646 | 132446  | 12733  | 6.443   | 4.939   |
| 总计 |       | 2055557 | 257832 | 100.000 | 100.000 |

<色谱图>

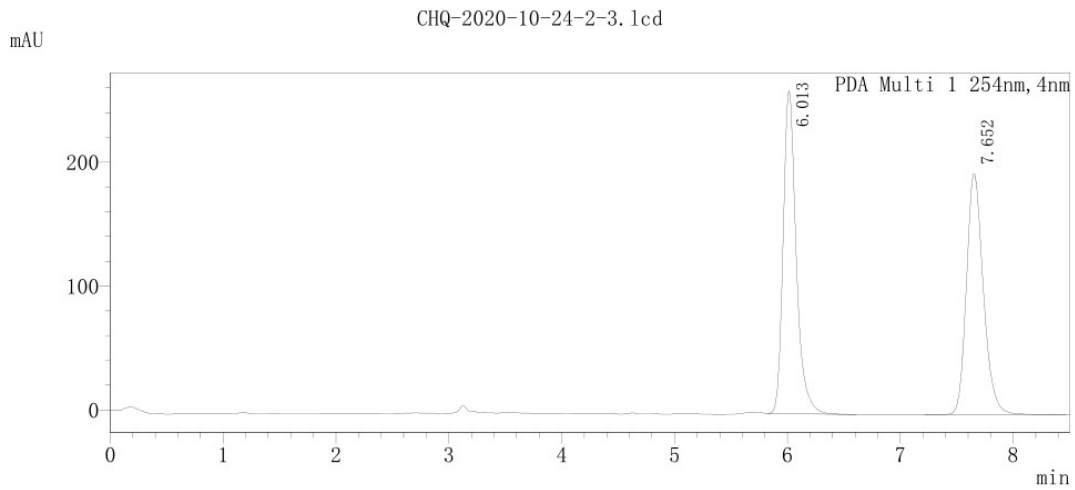

<峰表>

CHQ-2020-10-24-2-3. lcd

PDA Ch1 254nm

| 峰号 | 保留时间  | 面积      | 高度     | 面积%     | 高度%     |
|----|-------|---------|--------|---------|---------|
| 1  | 6.013 | 2083284 | 260402 | 50.598  | 57.239  |
| 2  | 7.652 | 2034026 | 194534 | 49.402  | 42.761  |
| 总计 |       | 4117310 | 454936 | 100.000 | 100.000 |



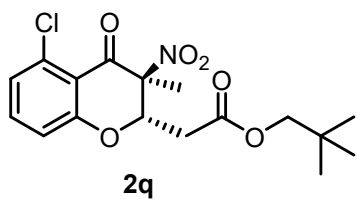

<色谱图>

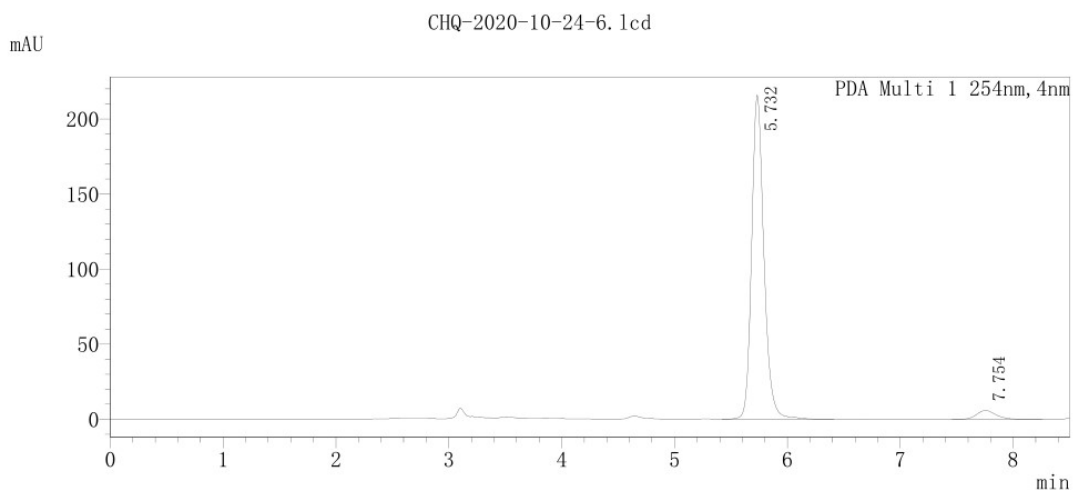

<峰表>

CHQ-2020-10-24-6. lcd

PDA Ch1 254nm

| 峰号 | 保留时间  | 面积      | 高度     | 面积%     | 高度%     |
|----|-------|---------|--------|---------|---------|
| 1  | 5.732 | 1636036 | 215840 | 95.875  | 97.339  |
| 2  | 7.754 | 70386   | 5901   | 4.125   | 2.661   |
| 总计 |       | 1706422 | 221742 | 100.000 | 100.000 |

<色谱图>

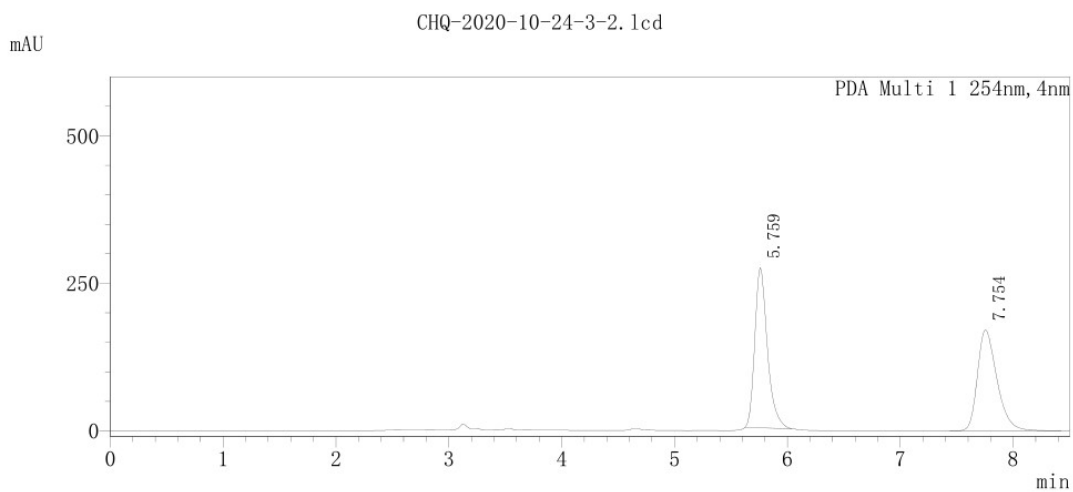

<峰表>

CHQ-2020-10-24-3-2. lcd

PDA Ch1 254nm

| 峰号 | 保留时间  | 面积      | 高度     | 面积%     | 高度%     |
|----|-------|---------|--------|---------|---------|
| 1  | 5.759 | 2107461 | 272053 | 50.713  | 61.370  |
| 2  | 7.754 | 2048209 | 171246 | 49.287  | 38.630  |
| 总计 |       | 4155670 | 443299 | 100.000 | 100.000 |

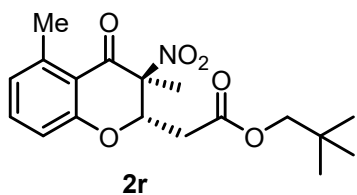

<色谱图>

mAU

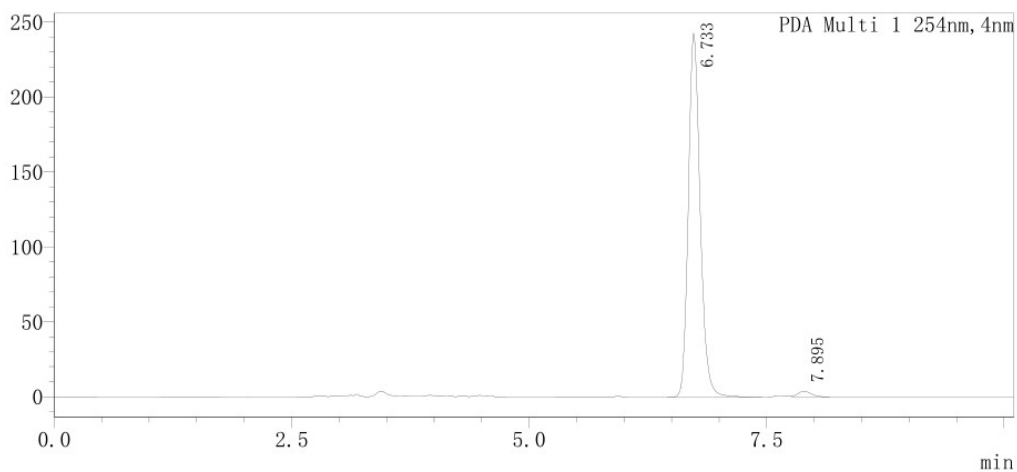

<峰表>

CHQ-2020-10-24-4-2.1cd

PDA Ch1 254nm

| 峰号 | 保留时间  | 面积      | 高度     | 面积%     | 高度%     |
|----|-------|---------|--------|---------|---------|
| 1  | 6.733 | 2104036 | 242556 | 98.280  | 98.481  |
| 2  | 7.895 | 36821   | 3742   | 1.720   | 1.519   |
| 总计 |       | 2140857 | 246298 | 100.000 | 100.000 |

<色谱图>

mAU

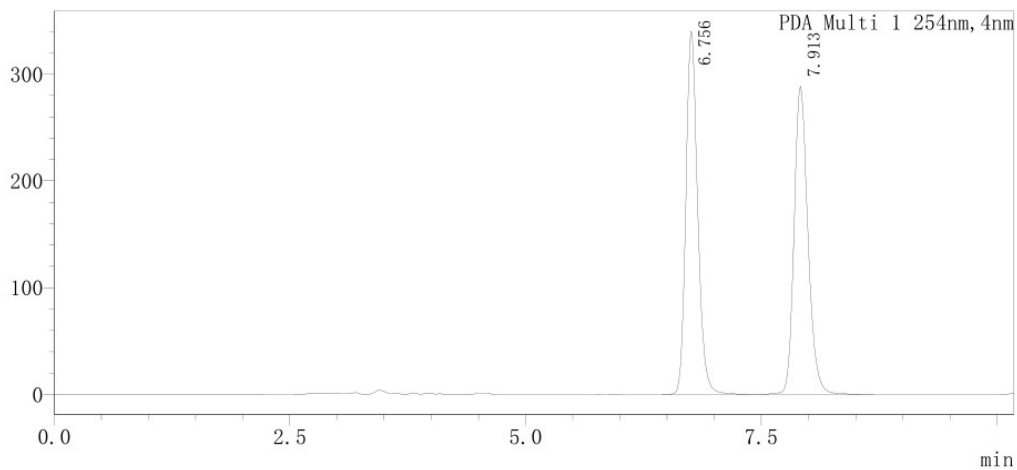

<峰表>

CHQ-2020-10-24-1-3.1cd

PDA Ch1 254nm

| 峰号 | 保留时间  | 面积      | 高度     | 面积%     | 高度%     |
|----|-------|---------|--------|---------|---------|
| 1  | 6.756 | 2961049 | 339890 | 50.105  | 54.087  |
| 2  | 7.913 | 2948600 | 288519 | 49.895  | 45.913  |
| 总计 |       | 5909649 | 628409 | 100.000 | 100.000 |

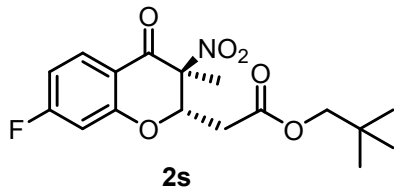

<色谱图>

mAU

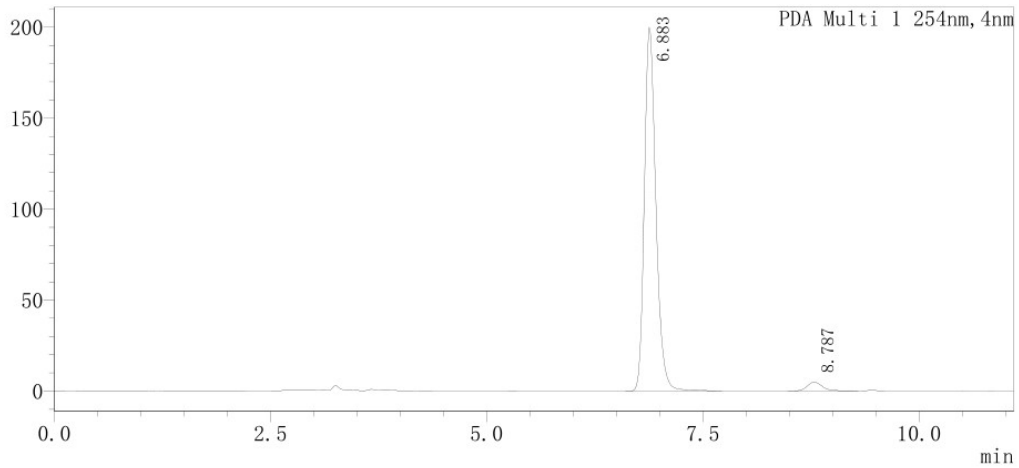

<峰表>

CHQ-2020-10-29-6. lcd

PDA Ch1 254nm

| 峰号 | 保留时间  | 面积      | 高度     | 面积%     | 高度%     |
|----|-------|---------|--------|---------|---------|
| 1  | 6.883 | 1849214 | 199809 | 96.907  | 97.620  |
| 2  | 8.787 | 59013   | 4872   | 3.093   | 2.380   |
| 总计 |       | 1908228 | 204681 | 100.000 | 100.000 |

<色谱图>

mAU

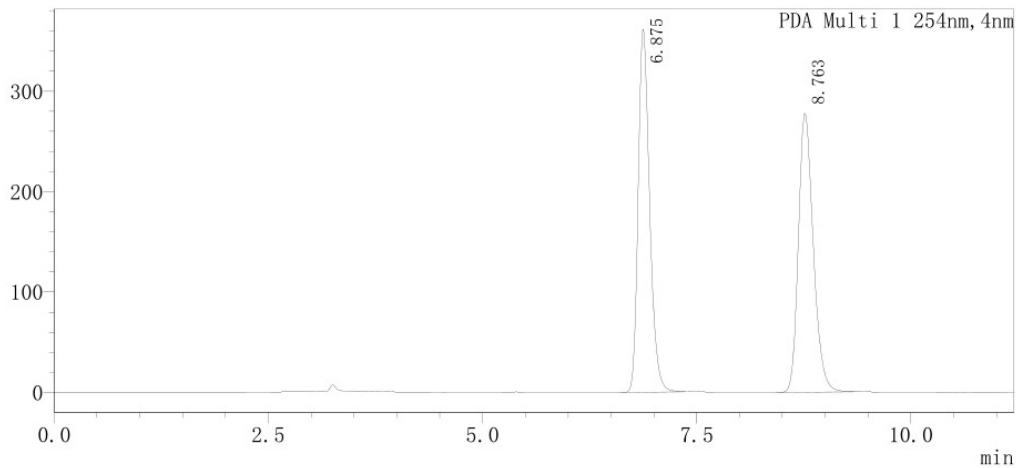

<峰表>

CHQ-2020-10-29-3. lcd

PDA Ch1 254nm

| 峰号 | 保留时间  | 面积      | 高度     | 面积%     | 高度%     |
|----|-------|---------|--------|---------|---------|
| 1  | 6.875 | 3369873 | 361187 | 50.004  | 56.536  |
| 2  | 8.763 | 3369368 | 277674 | 49.996  | 43.464  |
| 总计 |       | 6739241 | 638861 | 100.000 | 100.000 |

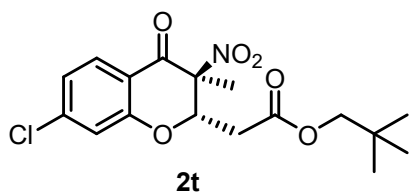

<色谱图>

mAU

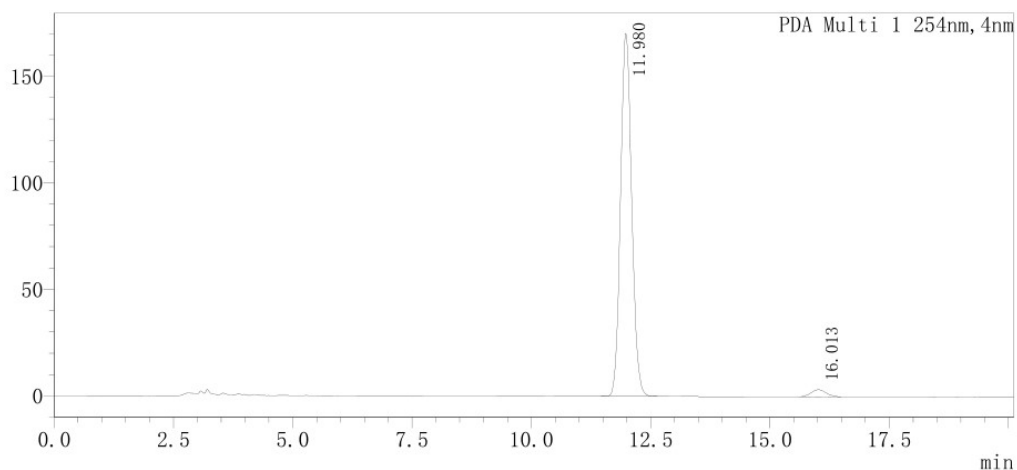

<峰表>

CHQ-2021-1-2-2-3. lcd

PDA Ch1 254nm

| 峰号 | 保留时间   | 面积      | 高度     | 面积%     | 高度%     |
|----|--------|---------|--------|---------|---------|
| 1  | 11.980 | 2778756 | 170458 | 97.481  | 98.114  |
| 2  | 16.013 | 71800   | 3277   | 2.519   | 1.886   |
| 总计 |        | 2850556 | 173735 | 100.000 | 100.000 |

<色谱图>

mAU

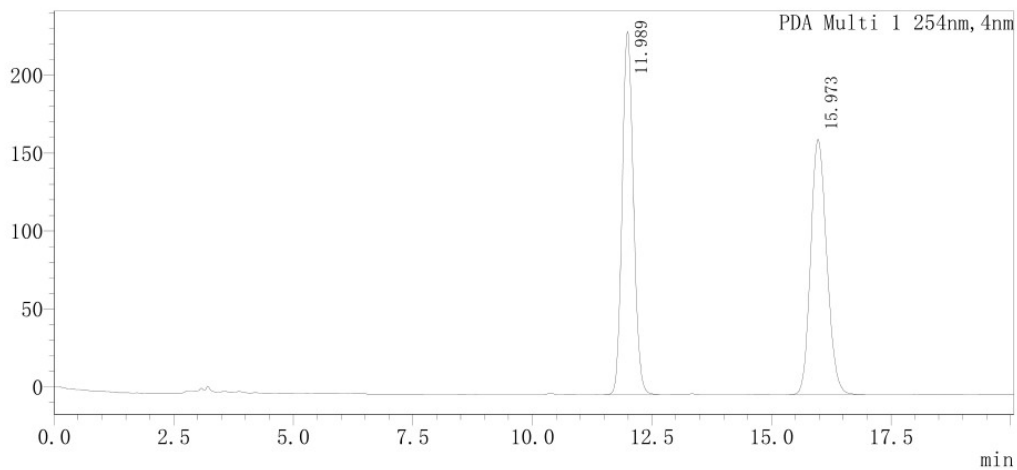

<峰表>

CHQ-2021-1-2-1-4. lcd

PDA Ch1 254nm

| 峰号 | 保留时间   | 面积      | 高度     | 面积%     | 高度%     |
|----|--------|---------|--------|---------|---------|
| 1  | 11.989 | 3812253 | 232834 | 49.893  | 58.719  |
| 2  | 15.973 | 3828619 | 163688 | 50.107  | 41.281  |
| 总计 |        | 7640872 | 396522 | 100.000 | 100.000 |

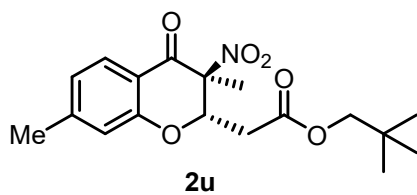

<色谱图>

mAU

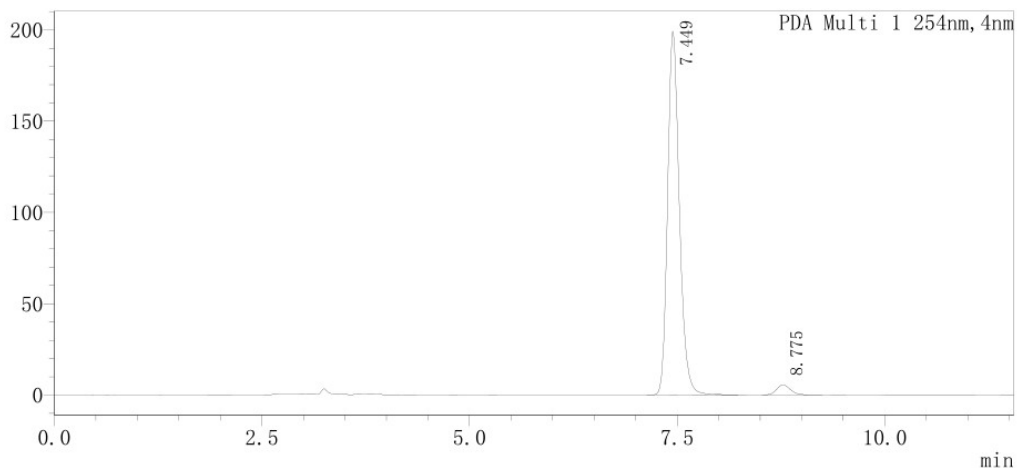

<峰表>

CHQ-2020-10-29-5. lcd

PDA Ch1 254nm

| 峰号 | 保留时间  | 面积      | 高度     | 面积%     | 高度%     |
|----|-------|---------|--------|---------|---------|
| 1  | 7.449 | 1961591 | 199090 | 96.778  | 97.264  |
| 2  | 8.775 | 65302   | 5600   | 3.222   | 2.736   |
| 总计 |       | 2026893 | 204690 | 100.000 | 100.000 |

<色谱图>

mAU

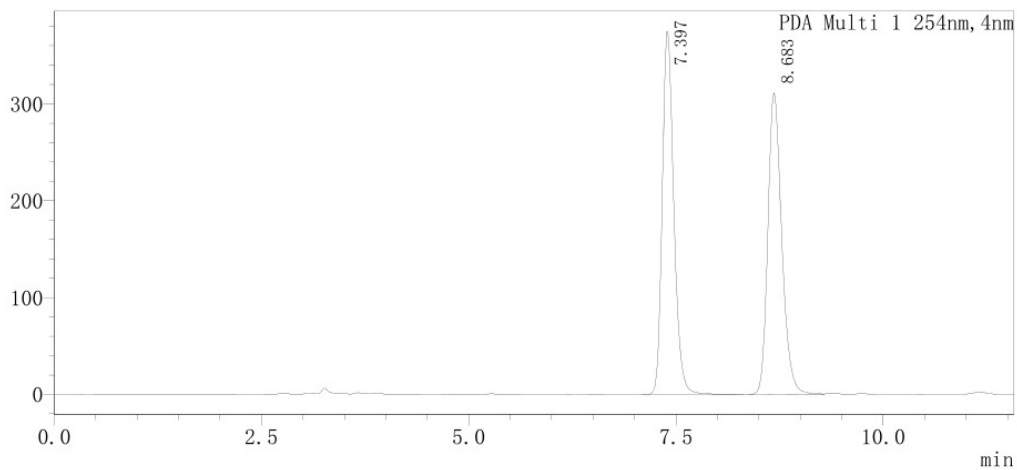

<峰表>

CHQ-2020-10-29-2. lcd

PDA Ch1 254nm

| 峰号 | 保留时间  | 面积      | 高度     | 面积%     | 高度%     |
|----|-------|---------|--------|---------|---------|
| 1  | 7.397 | 3633533 | 374770 | 50.064  | 54.644  |
| 2  | 8.683 | 3624254 | 311074 | 49.936  | 45.356  |
| 总计 |       | 7257787 | 685844 | 100.000 | 100.000 |

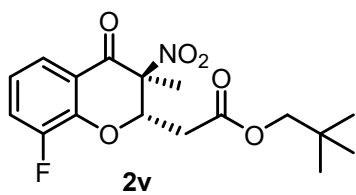

<色谱图>

mAU

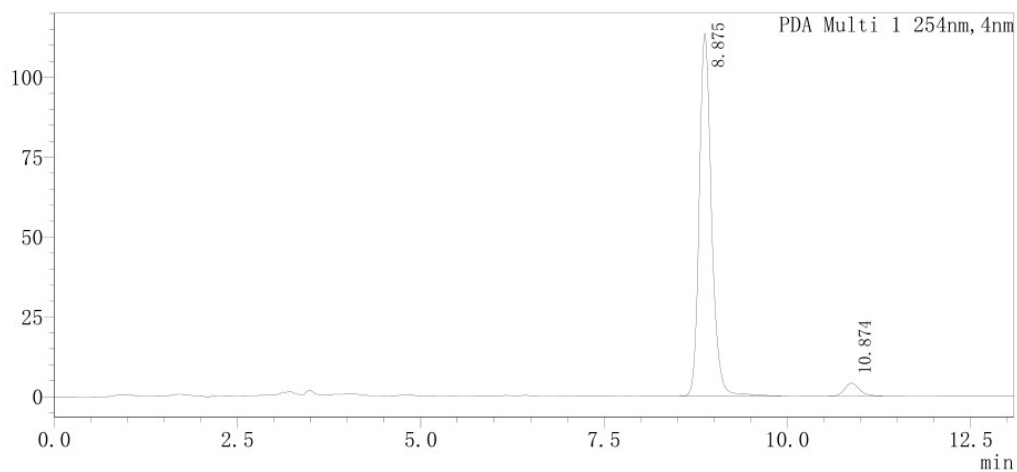

<峰表>

CHQ-2020-12-29-4. lcd

PDA Ch1 254nm

| 峰号 | 保留时间   | 面积      | 高度     | 面积%     | 高度%     |
|----|--------|---------|--------|---------|---------|
| 1  | 8.875  | 1321134 | 113523 | 95.894  | 96.575  |
| 2  | 10.874 | 56561   | 4026   | 4.106   | 3.425   |
| 总计 |        | 1377695 | 117549 | 100.000 | 100.000 |

<色谱图>

CHQ-2020-12-29-3-2. lcd

mAU

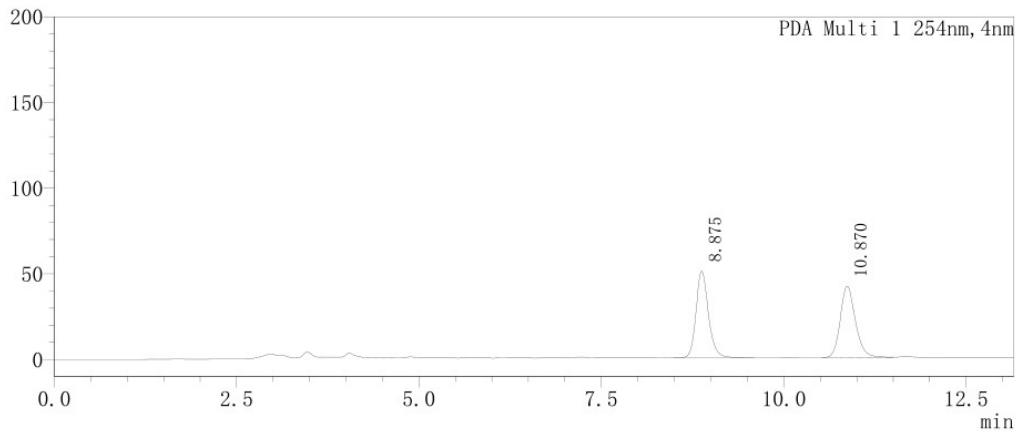

<峰表>

CHQ-2020-12-29-3-2. lcd

PDA Ch1 254nm

| 峰号 | 保留时间   | 面积      | 高度    | 面积%     | 高度%     |
|----|--------|---------|-------|---------|---------|
| 1  | 8.875  | 599523  | 50619 | 49.988  | 54.818  |
| 2  | 10.870 | 599800  | 41720 | 50.012  | 45.182  |
| 总计 |        | 1199323 | 92339 | 100.000 | 100.000 |

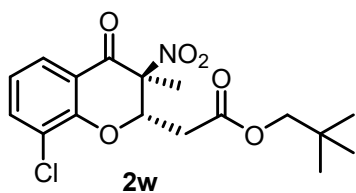

<色谱图>

mAU

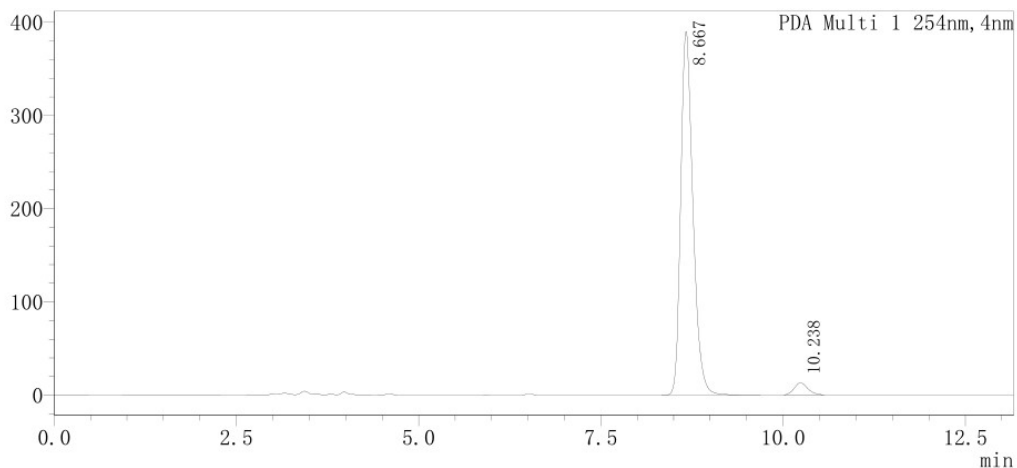

<峰表>

CHQ-2020-11-8-4.1cd

PDA Ch1 254nm

| 峰号 | 保留时间   | 面积      | 高度     | 面积%     | 高度%     |
|----|--------|---------|--------|---------|---------|
| 1  | 8.667  | 4551190 | 390119 | 96.547  | 96.848  |
| 2  | 10.238 | 162778  | 12698  | 3.453   | 3.152   |
| 总计 |        | 4713968 | 402818 | 100.000 | 100.000 |

<色谱图>

mAU

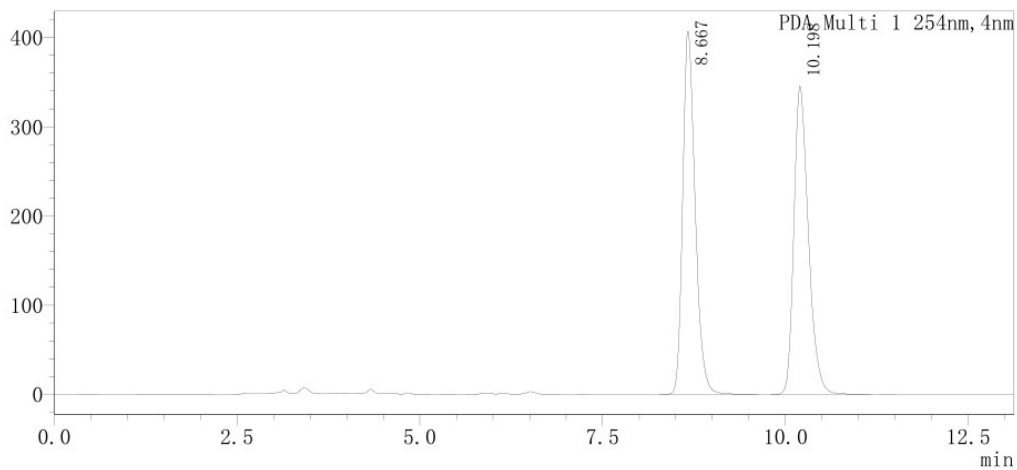

<峰表>

CHQ-2020-11-8-2.1cd

PDA Ch1 254nm

| 峰号 | 保留时间   | 面积      | 高度     | 面积%     | 高度%     |
|----|--------|---------|--------|---------|---------|
| 1  | 8.667  | 4822094 | 406722 | 50.298  | 54.056  |
| 2  | 10.198 | 4765019 | 345688 | 49.702  | 45.944  |
| 总计 |        | 9587113 | 752410 | 100.000 | 100.000 |

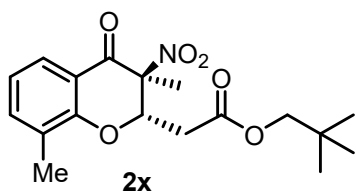

<色谱图>

mAU

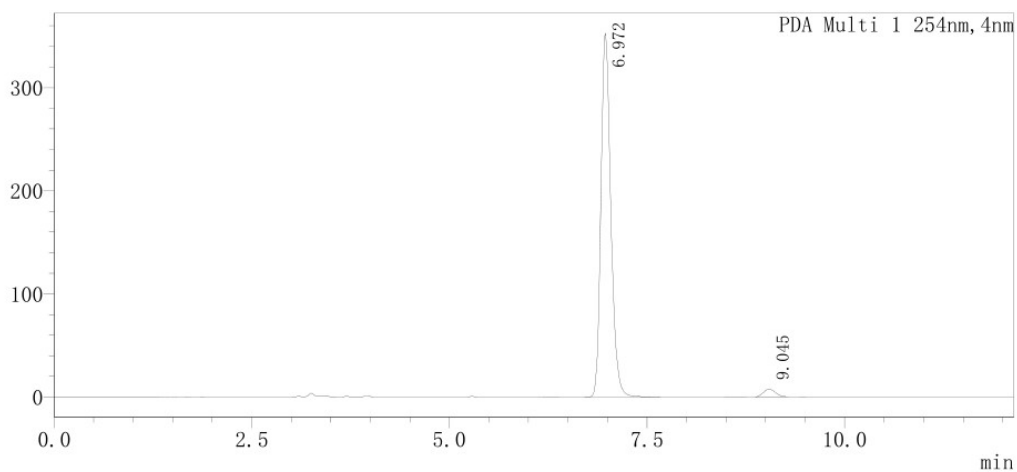

<峰表>

CHQ-2020-9-21-1-1.lcd

PDA Ch1 254nm

| 峰号 | 保留时间  | 面积      | 高度     | 面积%     | 高度%     |
|----|-------|---------|--------|---------|---------|
| 1  | 6.972 | 3073453 | 352413 | 97.554  | 97.938  |
| 2  | 9.045 | 77057   | 7419   | 2.446   | 2.062   |
| 总计 |       | 3150510 | 359832 | 100.000 | 100.000 |

<色谱图>

mAU

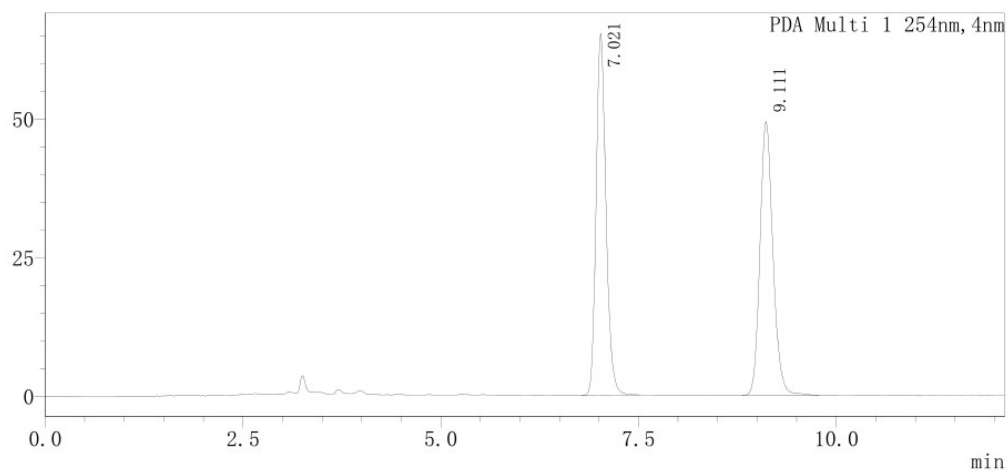

<峰表>

CHQ-2020-9-11-1.lcd

PDA Ch1 254nm

| 峰号 | 保留时间  | 面积      | 高度     | 面积%     | 高度%     |
|----|-------|---------|--------|---------|---------|
| 1  | 7.021 | 566984  | 65249  | 50.099  | 56.917  |
| 2  | 9.111 | 564749  | 49391  | 49.901  | 43.083  |
| 总计 |       | 1131733 | 114640 | 100.000 | 100.000 |



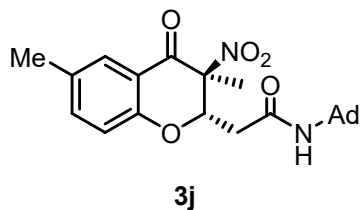

<色谱图>

mAU

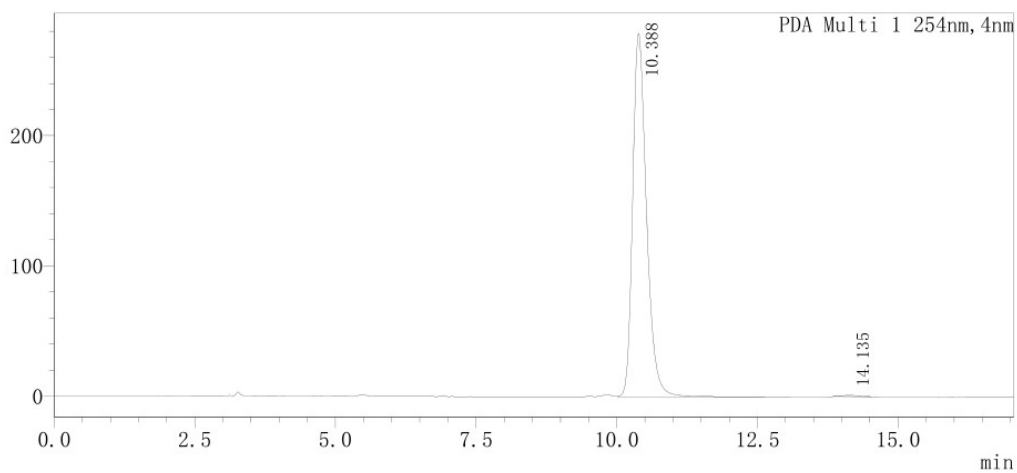

<峰表>

CHQ-2020-11-29-2.1cd

PDA Ch1 254nm

| 峰号 | 保留时间   | 面积      | 高度     | 面积%     | 高度%     |
|----|--------|---------|--------|---------|---------|
| 1  | 10.388 | 4778740 | 278875 | 99.562  | 99.663  |
| 2  | 14.135 | 21003   | 944    | 0.438   | 0.337   |
| 总计 |        | 4799743 | 279820 | 100.000 | 100.000 |

<色谱图>

mAU

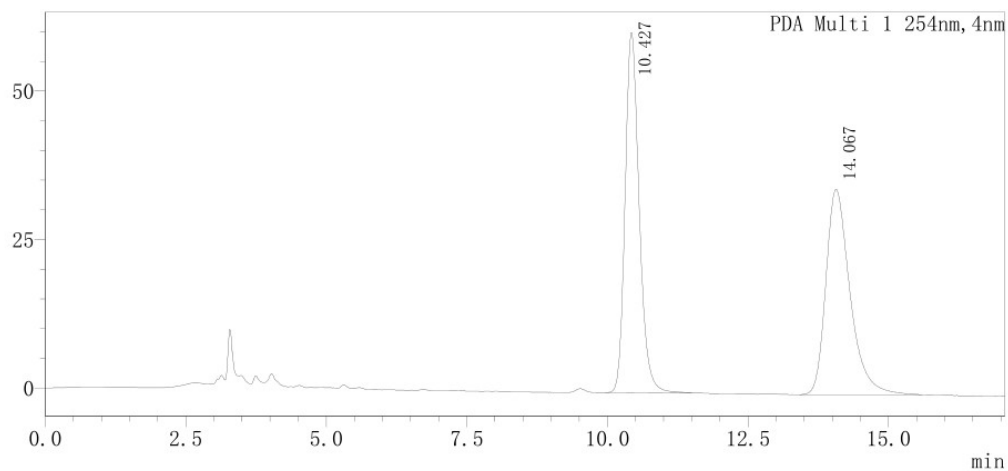

<峰表>

CHQ-2020-11-29-1-2.1cd

PDA Ch1 254nm

| 峰号 | 保留时间   | 面积      | 高度    | 面积%     | 高度%     |
|----|--------|---------|-------|---------|---------|
| 1  | 10.427 | 1061684 | 60668 | 50.608  | 63.684  |
| 2  | 14.067 | 1036171 | 34596 | 49.392  | 36.316  |
| 总计 |        | 2097854 | 95264 | 100.000 | 100.000 |

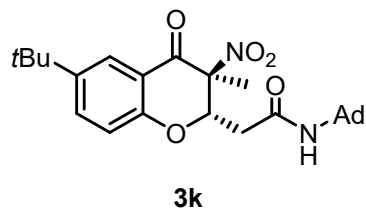

<色谱图>

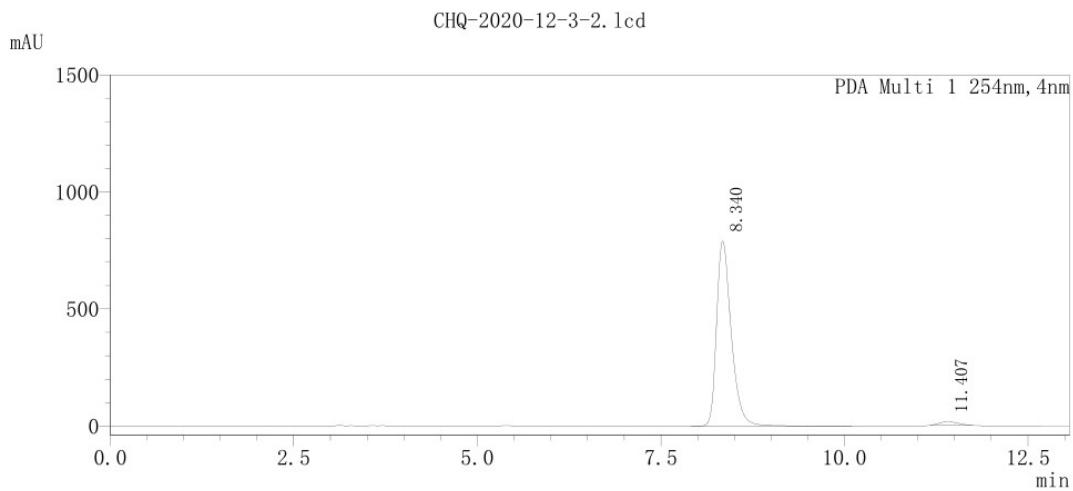

<峰表>

CHQ-2020-12-3-2.1cd

| PDA Ch1 254nm |        |          |        |         |
|---------------|--------|----------|--------|---------|
| 峰号            | 保留时间   | 面积       | 高度     | 面积%     |
| 1             | 8.340  | 10976222 | 791514 | 97.545  |
| 2             | 11.407 | 276207   | 15635  | 2.455   |
| 总计            |        | 11252429 | 807149 | 100.000 |

<色谱图>

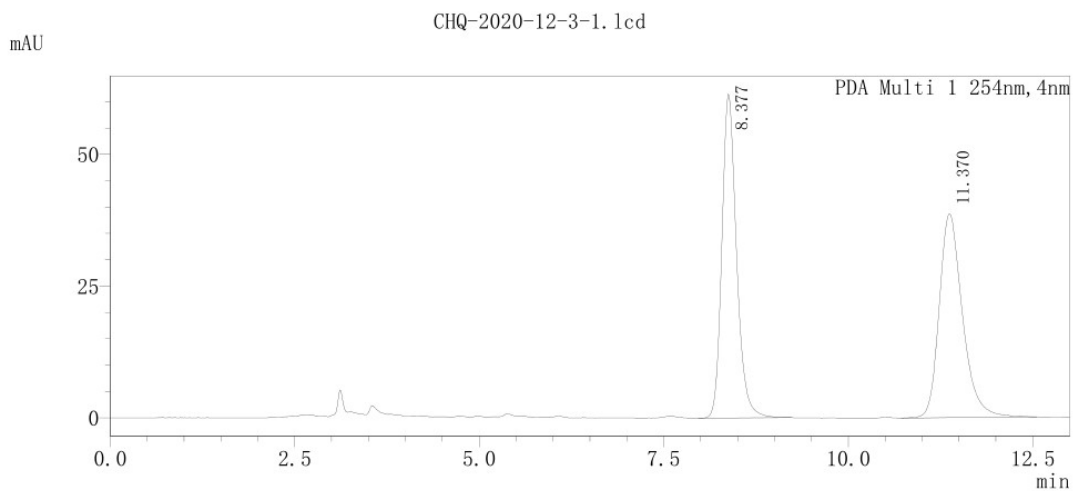

<峰表>

CHQ-2020-12-3-1.1cd

| PDA Ch1 254nm |        |         |        |         |         |
|---------------|--------|---------|--------|---------|---------|
| 峰号            | 保留时间   | 面积      | 高度     | 面积%     | 高度%     |
| 1             | 8.377  | 851674  | 61483  | 50.108  | 61.374  |
| 2             | 11.370 | 848011  | 38694  | 49.892  | 38.626  |
| 总计            |        | 1699685 | 100177 | 100.000 | 100.000 |

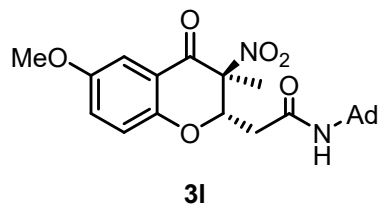

<色谱图>

mAU

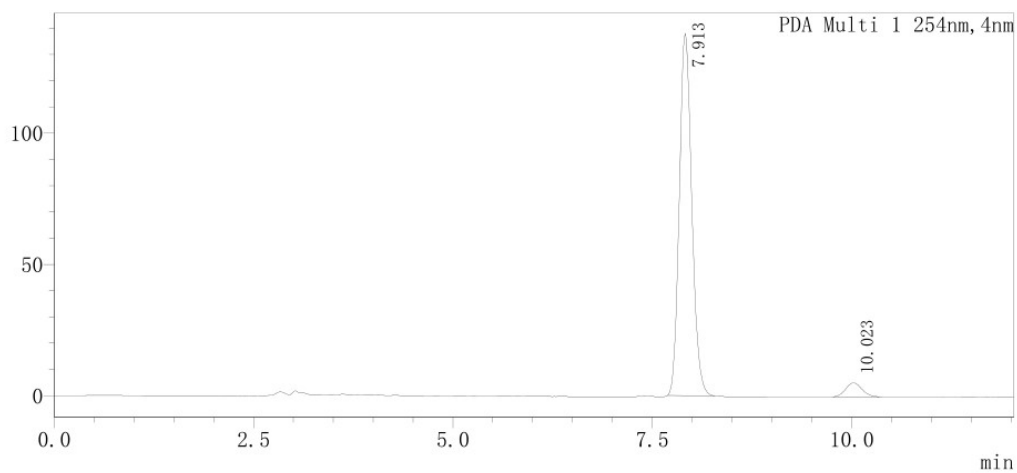

<峰表>

CHQ-2021-1-29-2.1cd

PDA Ch1 254nm

| 峰号 | 保留时间   | 面积      | 高度     | 面积%     | 高度%     |
|----|--------|---------|--------|---------|---------|
| 1  | 7.913  | 1503485 | 137998 | 95.265  | 96.292  |
| 2  | 10.023 | 74734   | 5315   | 4.735   | 3.708   |
| 总计 |        | 1578219 | 143312 | 100.000 | 100.000 |

<色谱图>

mAU

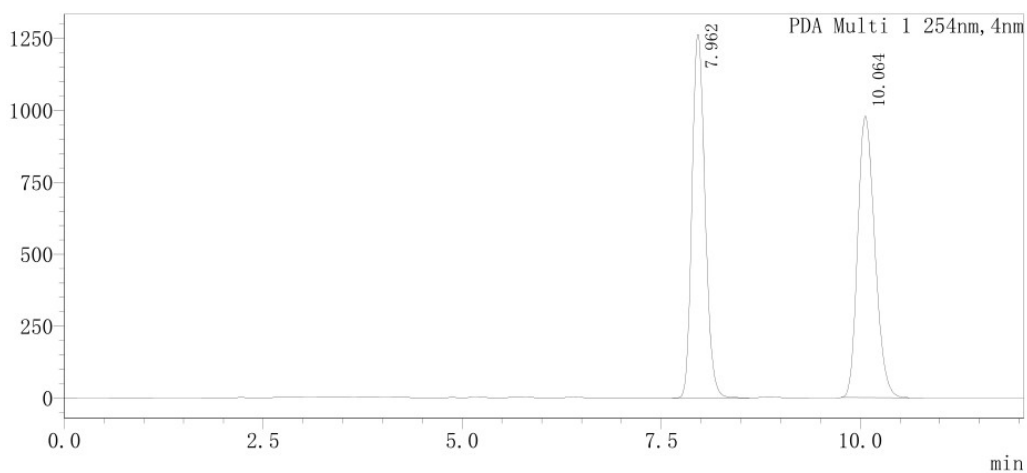

<峰表>

CHQ-2021-1-29-1.1cd

PDA Ch1 254nm

| 峰号 | 保留时间   | 面积       | 高度      | 面积%     | 高度%     |
|----|--------|----------|---------|---------|---------|
| 1  | 7.962  | 14383519 | 1262418 | 49.498  | 56.354  |
| 2  | 10.064 | 14675373 | 977758  | 50.502  | 43.646  |
| 总计 |        | 29058892 | 2240176 | 100.000 | 100.000 |

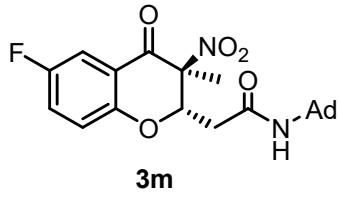

<色谱图>

mAU

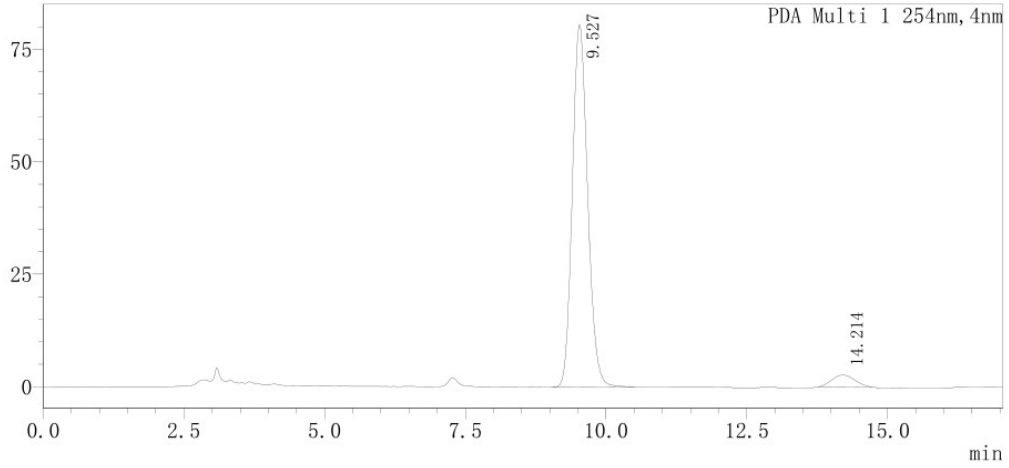

<峰表>

CHQ-2021-2-2-2. lcd

PDA Ch1 254nm

| 峰号 | 保留时间   | 面积      | 高度    | 面积%     | 高度%     |
|----|--------|---------|-------|---------|---------|
| 1  | 9.527  | 1527627 | 80578 | 95.268  | 96.806  |
| 2  | 14.214 | 75877   | 2659  | 4.732   | 3.194   |
| 总计 |        | 1603504 | 83237 | 100.000 | 100.000 |

<色谱图>

mAU

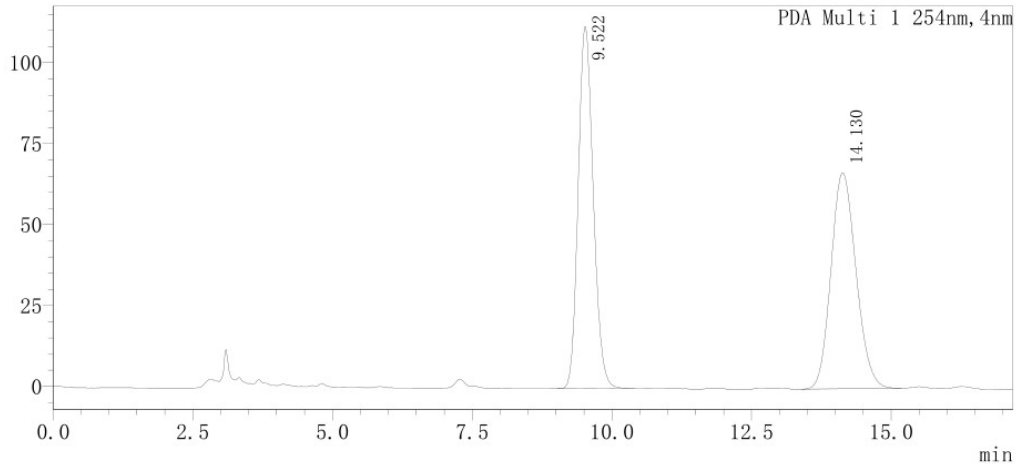

<峰表>

CHQ-2021-2-2-1-1. lcd

PDA Ch1 254nm

| 峰号 | 保留时间   | 面积      | 高度     | 面积%     | 高度%     |
|----|--------|---------|--------|---------|---------|
| 1  | 9.522  | 2110757 | 111986 | 50.339  | 62.636  |
| 2  | 14.130 | 2082358 | 66803  | 49.661  | 37.364  |
| 总计 |        | 4193115 | 178789 | 100.000 | 100.000 |

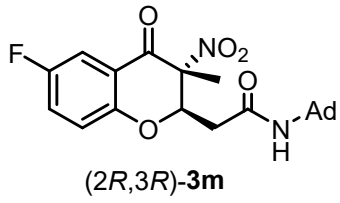

<色谱图>

mAU

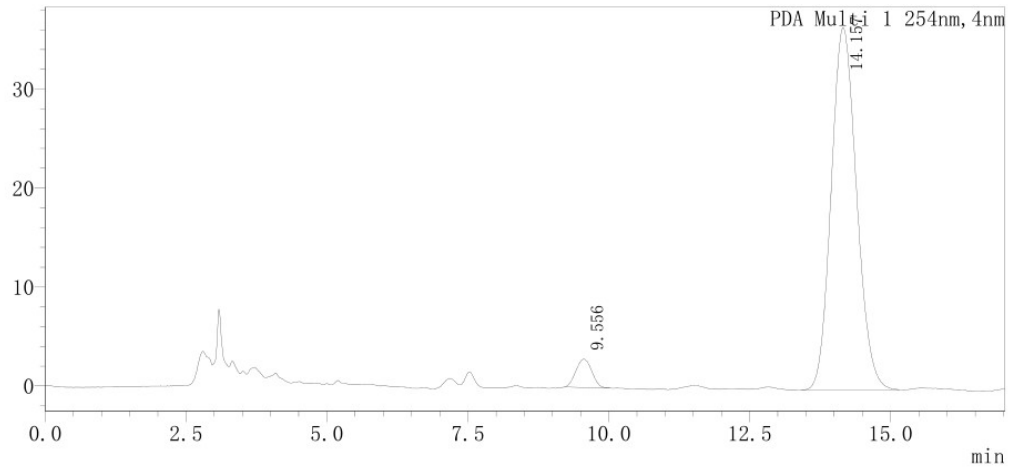

<峰表>

CHQ-2021-2-2-8.1cd

PDA Ch1 254nm

| 峰号 | 保留时间   | 面积      | 高度    | 面积%     | 高度%     |
|----|--------|---------|-------|---------|---------|
| 1  | 9.556  | 56257   | 2864  | 4.663   | 7.251   |
| 2  | 14.157 | 1150233 | 36629 | 95.337  | 92.749  |
| 总计 |        | 1206490 | 39493 | 100.000 | 100.000 |

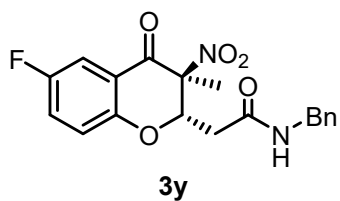

<色谱图>

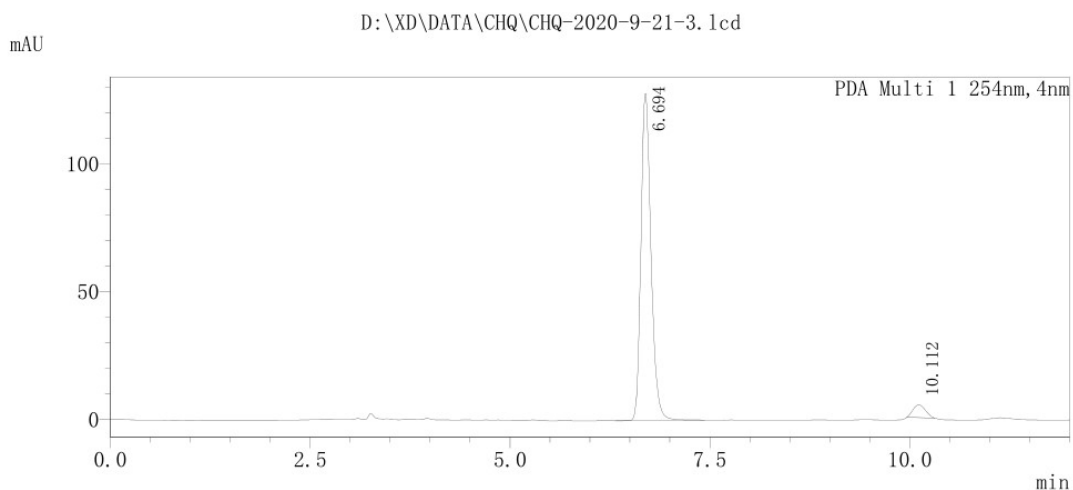

<峰表>

CHQ-2020-9-21-3.lcd

PDA Ch1 254nm

| 峰号 | 保留时间   | 面积      | 高度     | 面积%     | 高度%     |
|----|--------|---------|--------|---------|---------|
| 1  | 6.694  | 1116047 | 127915 | 95.323  | 96.210  |
| 2  | 10.112 | 54758   | 5039   | 4.677   | 3.790   |
| 总计 |        | 1170805 | 132955 | 100.000 | 100.000 |

<色谱图>

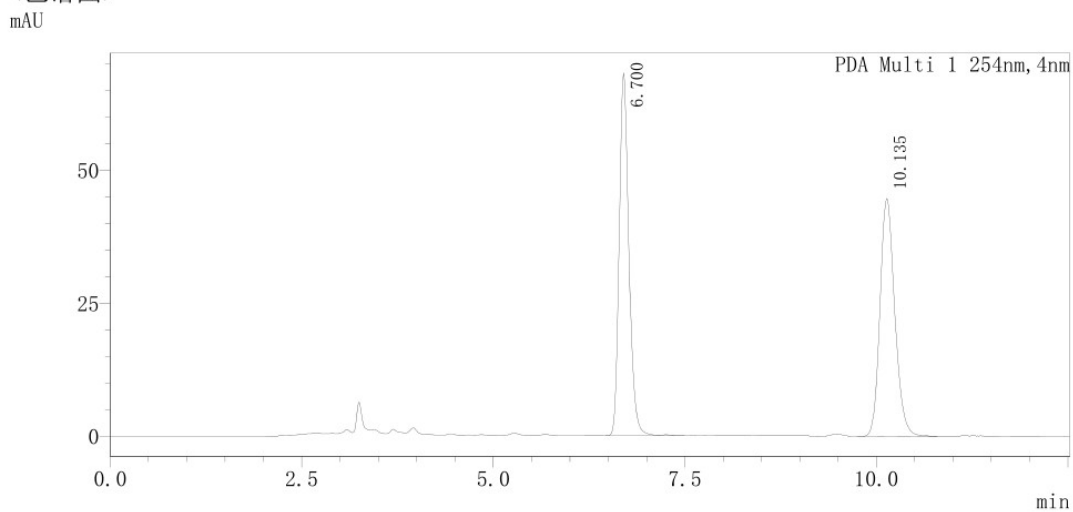

<峰表>

CHQ-2020-9-21-7.lcd

PDA Ch1 254nm

| 峰号 | 保留时间   | 面积      | 高度     | 面积%     | 高度%     |
|----|--------|---------|--------|---------|---------|
| 1  | 6.700  | 601023  | 68135  | 50.051  | 60.368  |
| 2  | 10.135 | 599790  | 44731  | 49.949  | 39.632  |
| 总计 |        | 1200814 | 112867 | 100.000 | 100.000 |

## 7. NMR charts

CHQ-2020-7-23-2

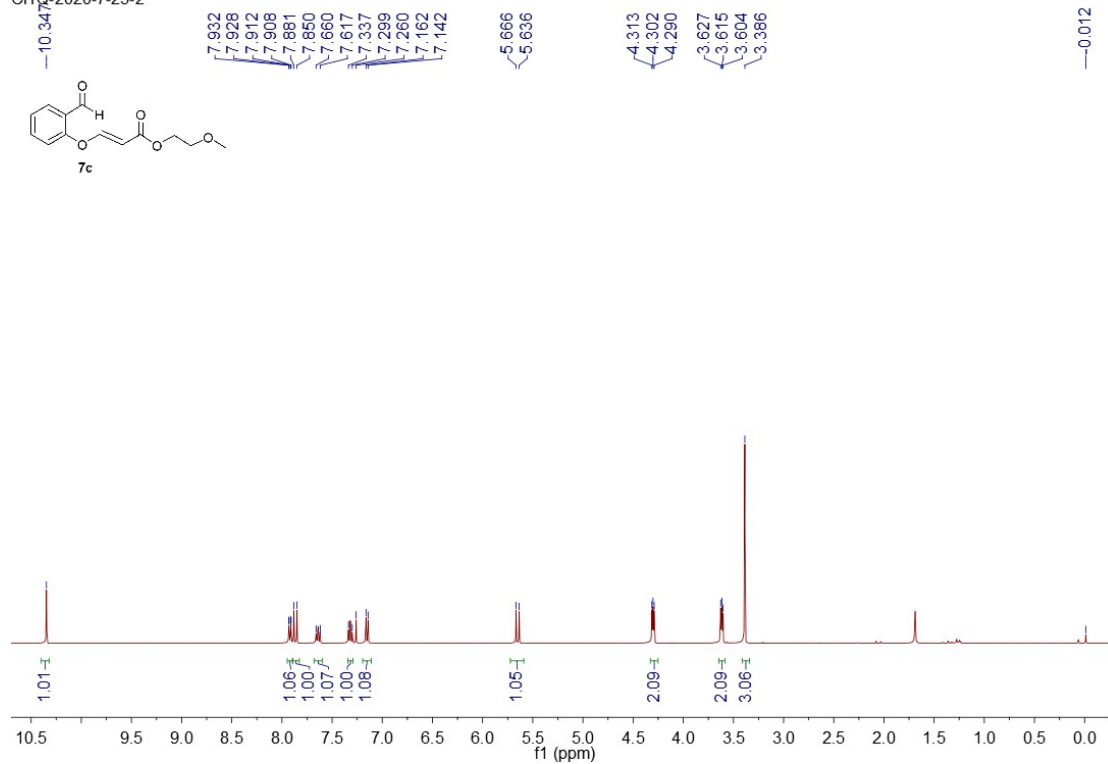

CHQ-2020-7-23-2

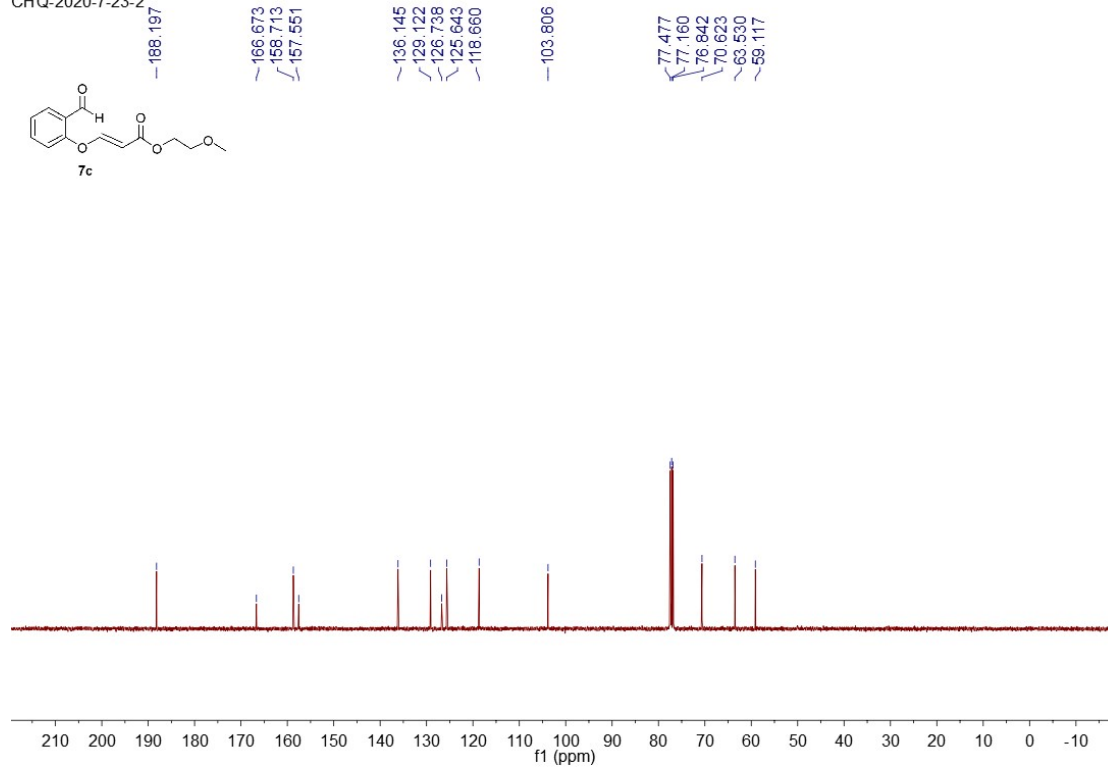

CHQ-2020-7-23-1

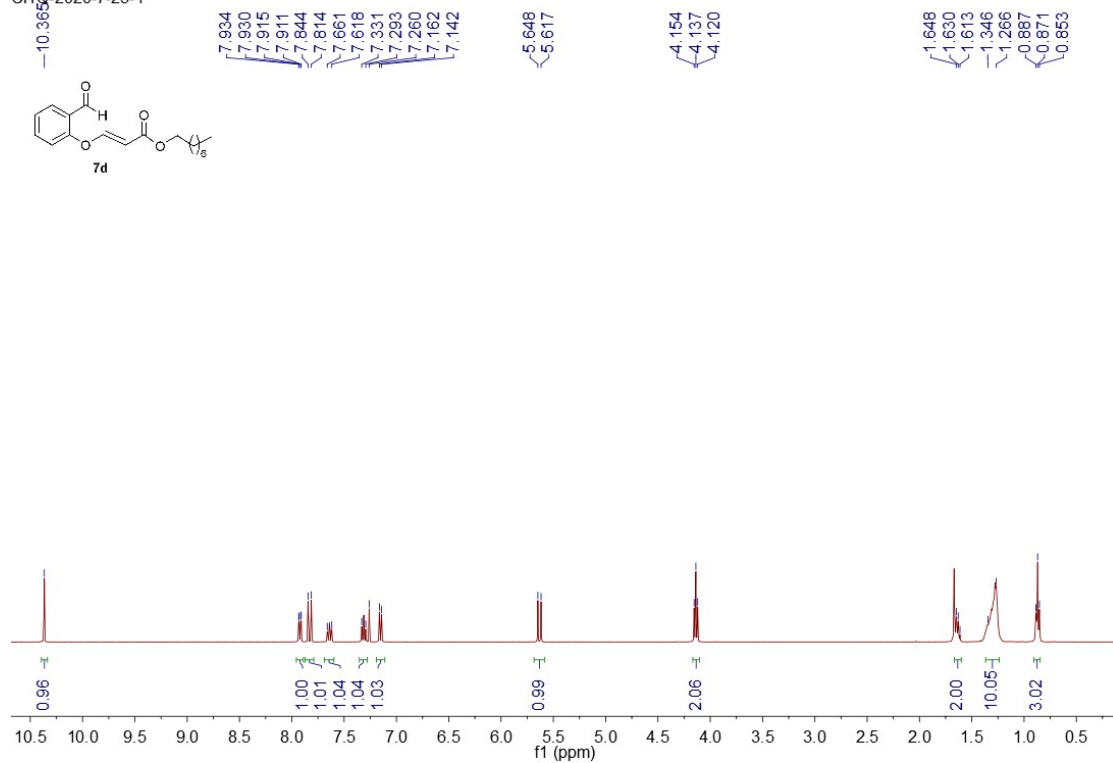

CHQ-2020-7-23-1

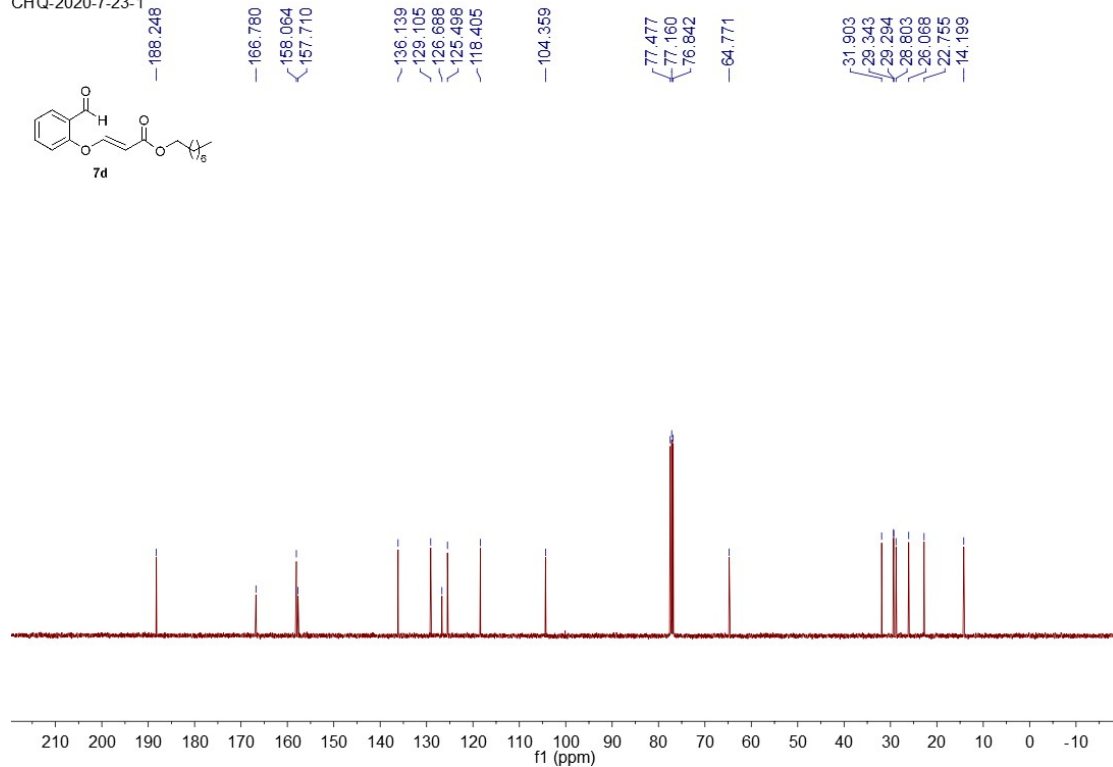



CHQ-2020-7-11-1

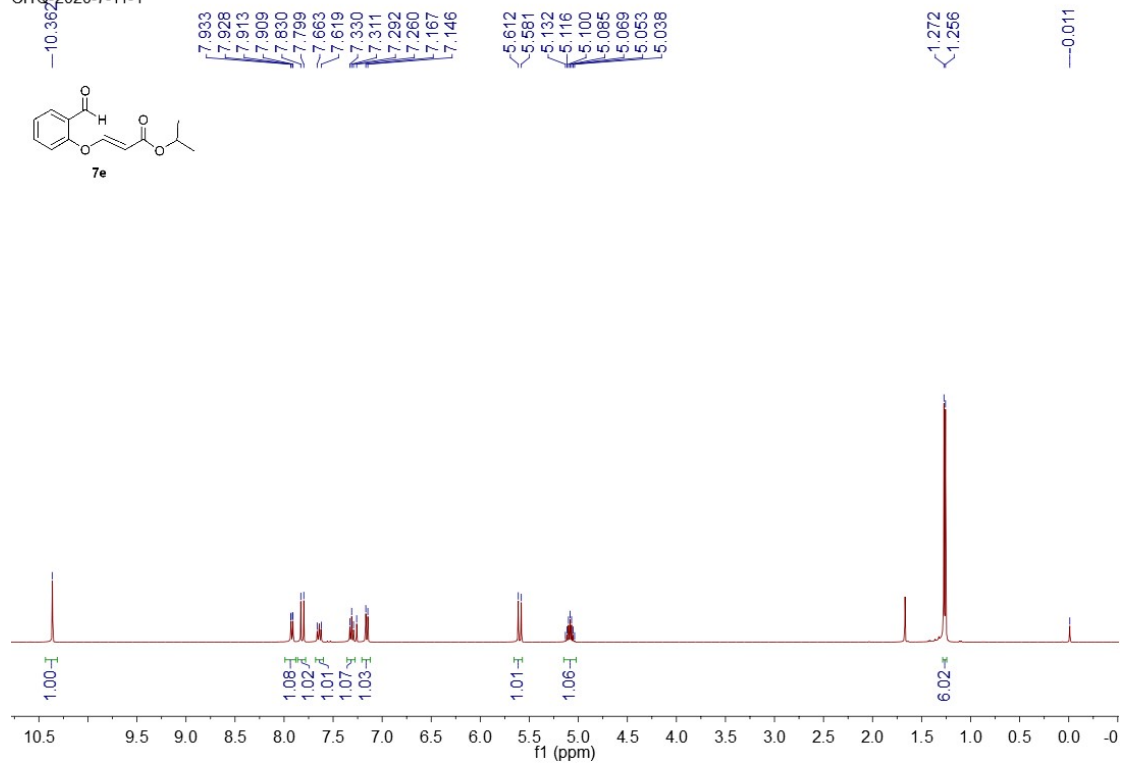

CHQ-2020-7-11-1

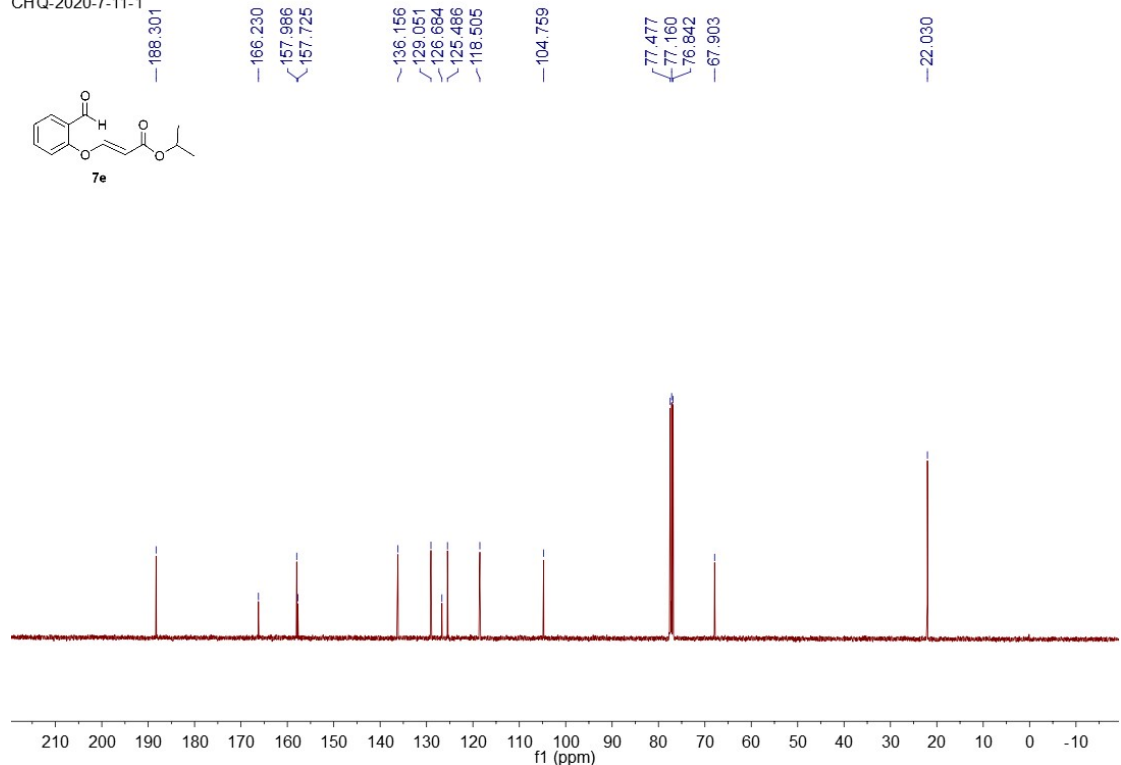

CHQ-2020-7-10-1

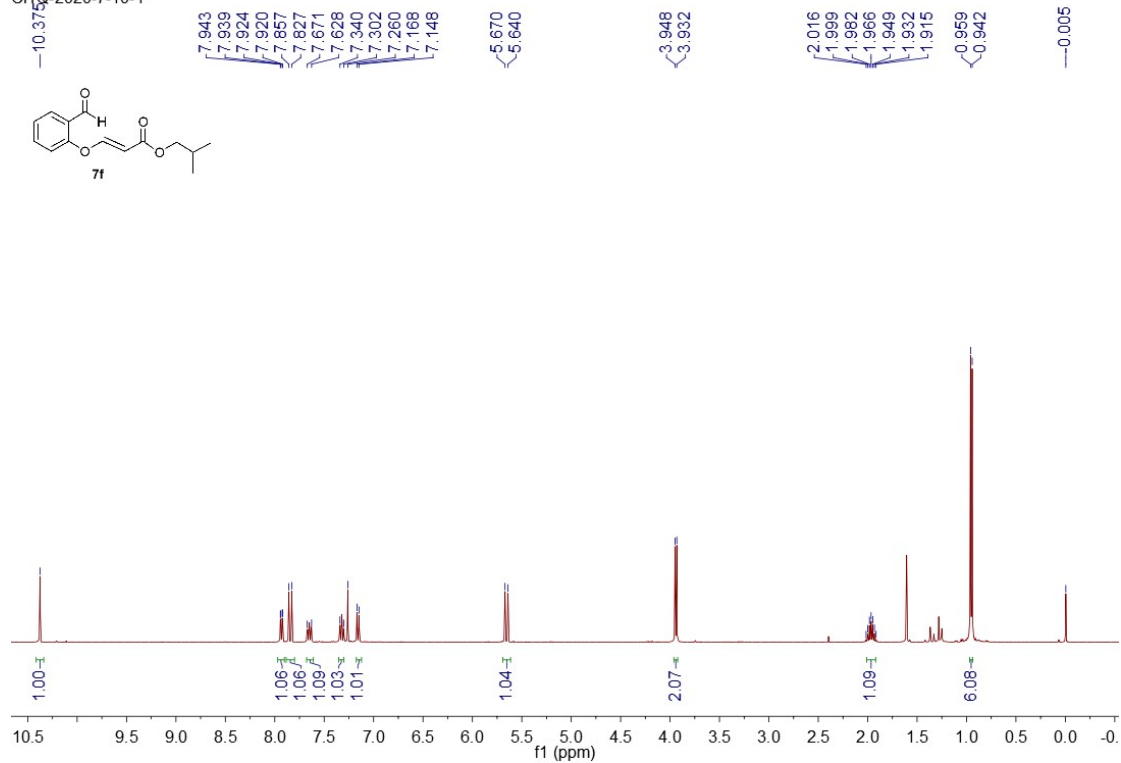

CHQ-2020-7-10-1

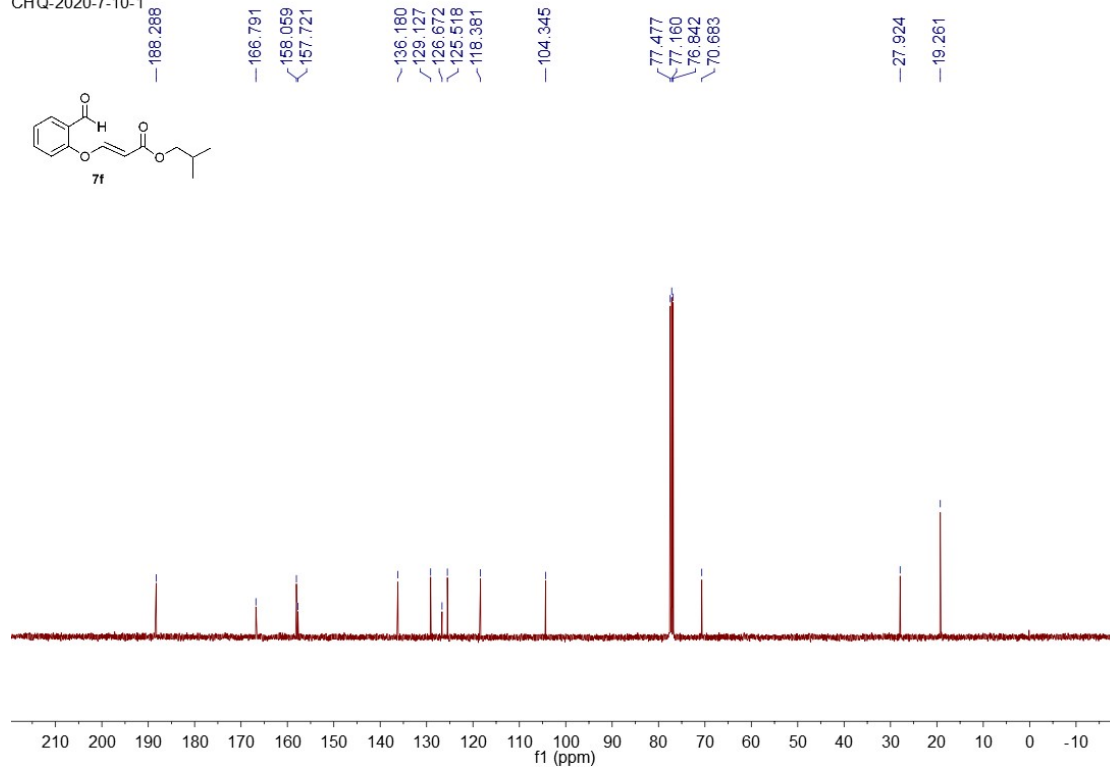

CHQ-2020-9-15-1

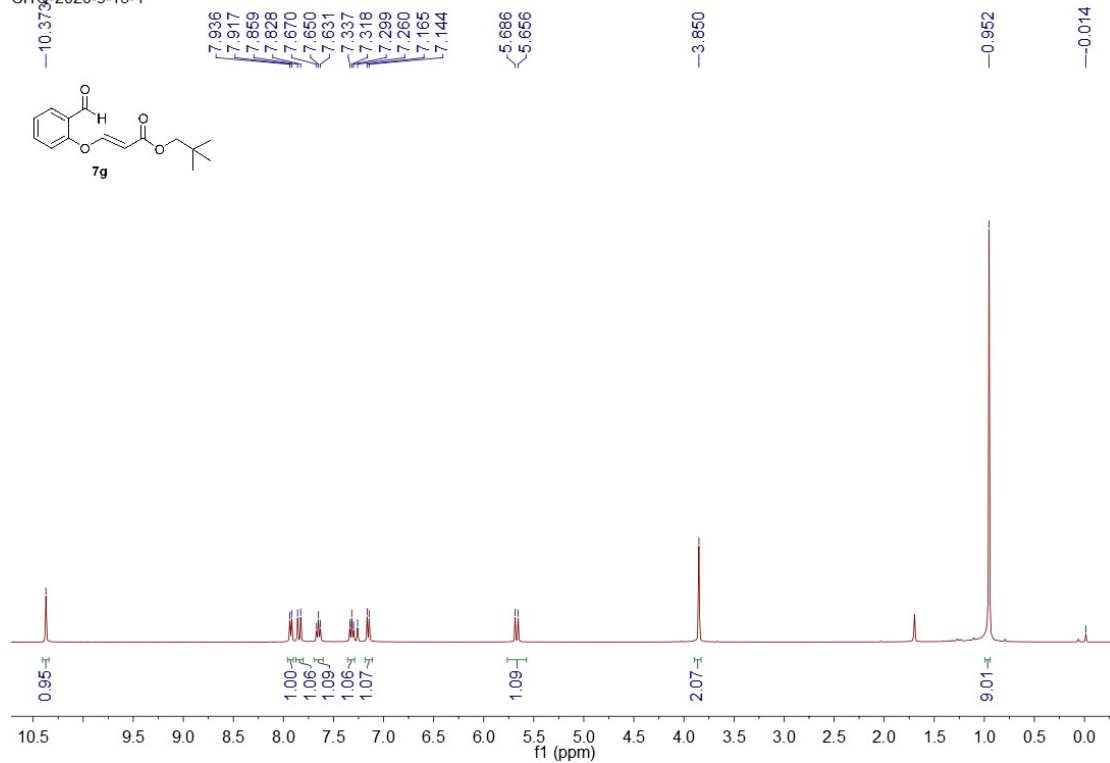

CHQ-2020-9-15-1

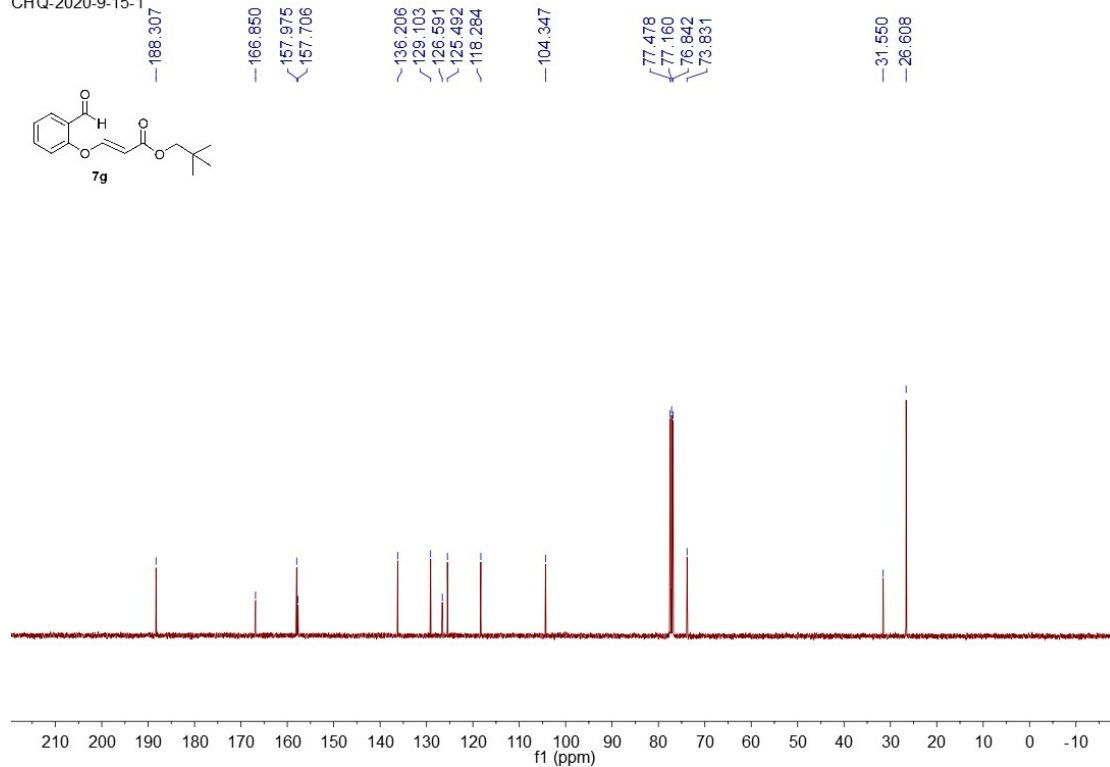

CHQ-2020-9-14-2

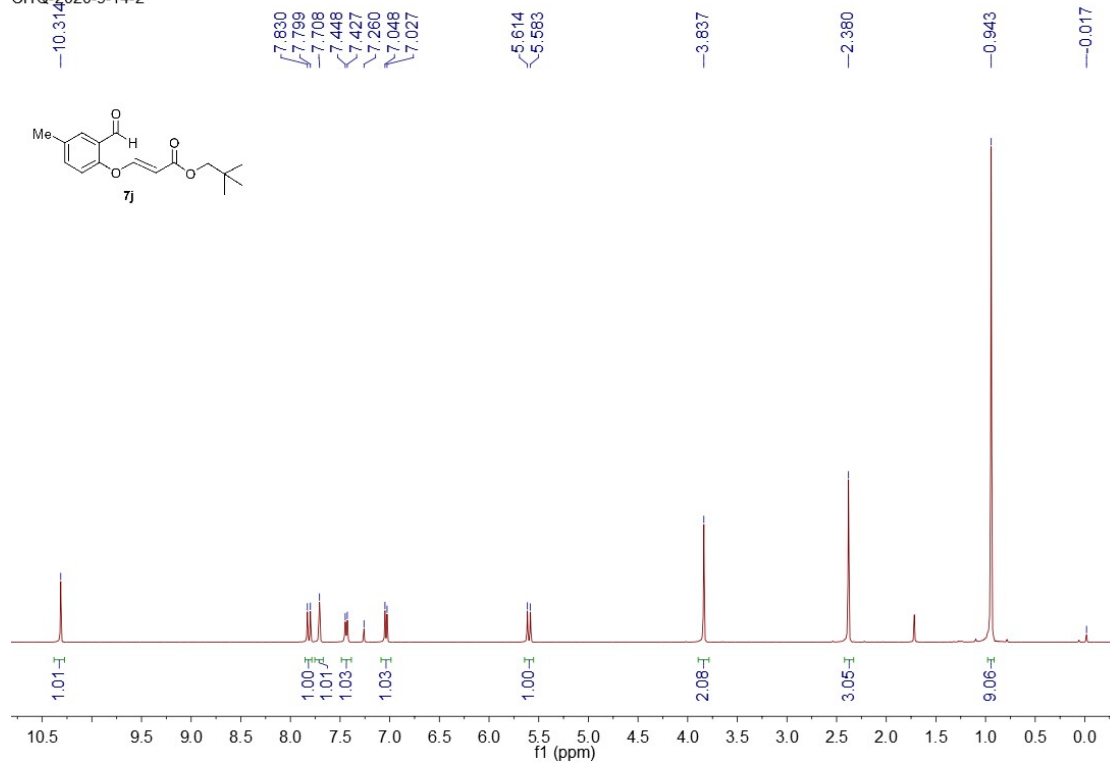

CHQ-2020-9-14-2

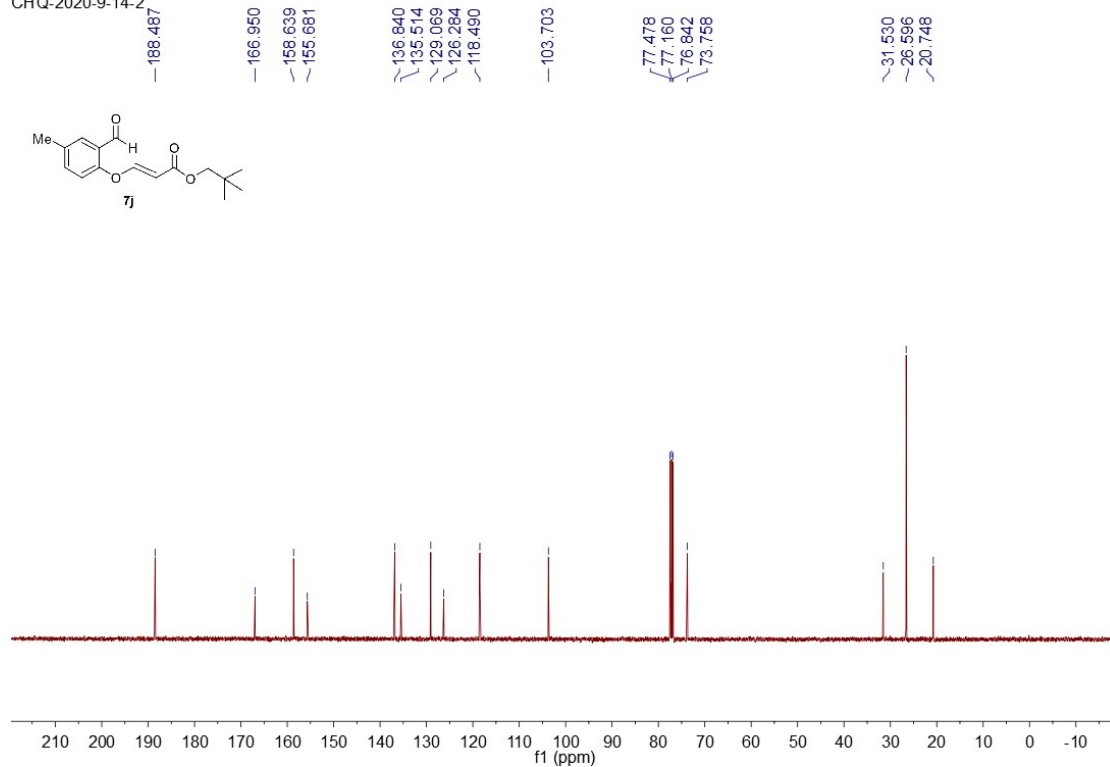

CHQ-2020-12-19-1

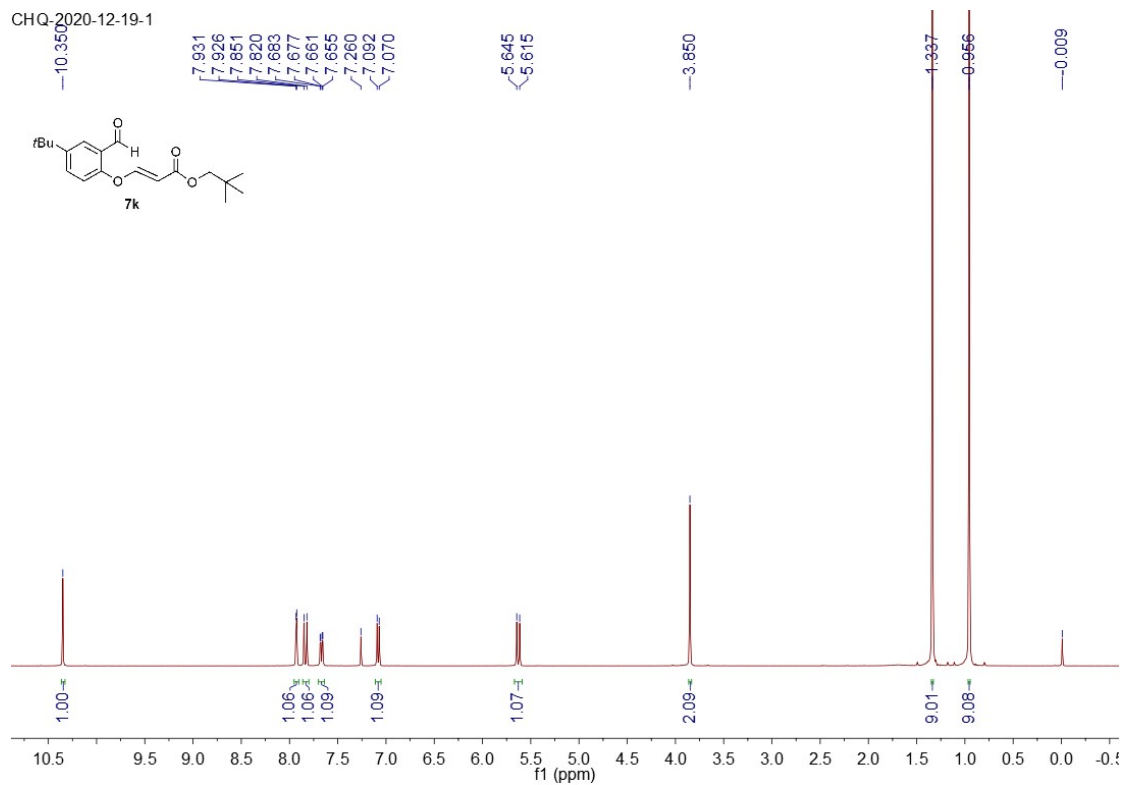

CHQ-2020-12-19-1

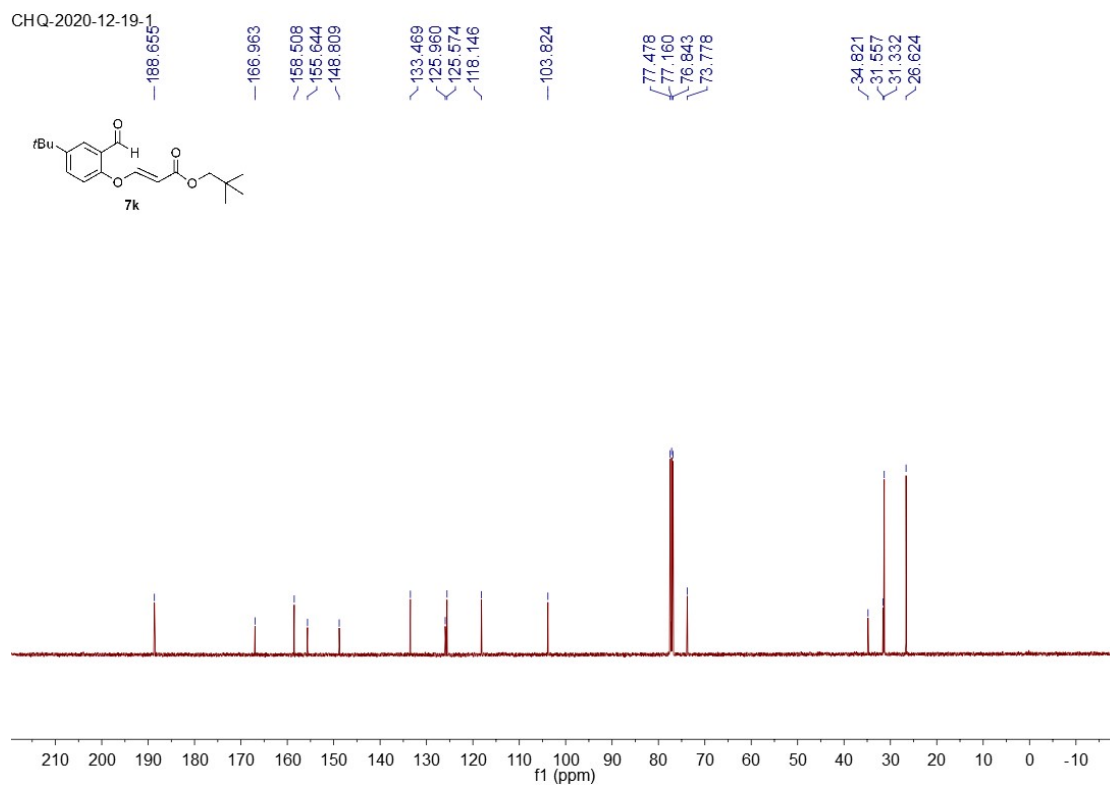

CHQ-2020-9-21-1

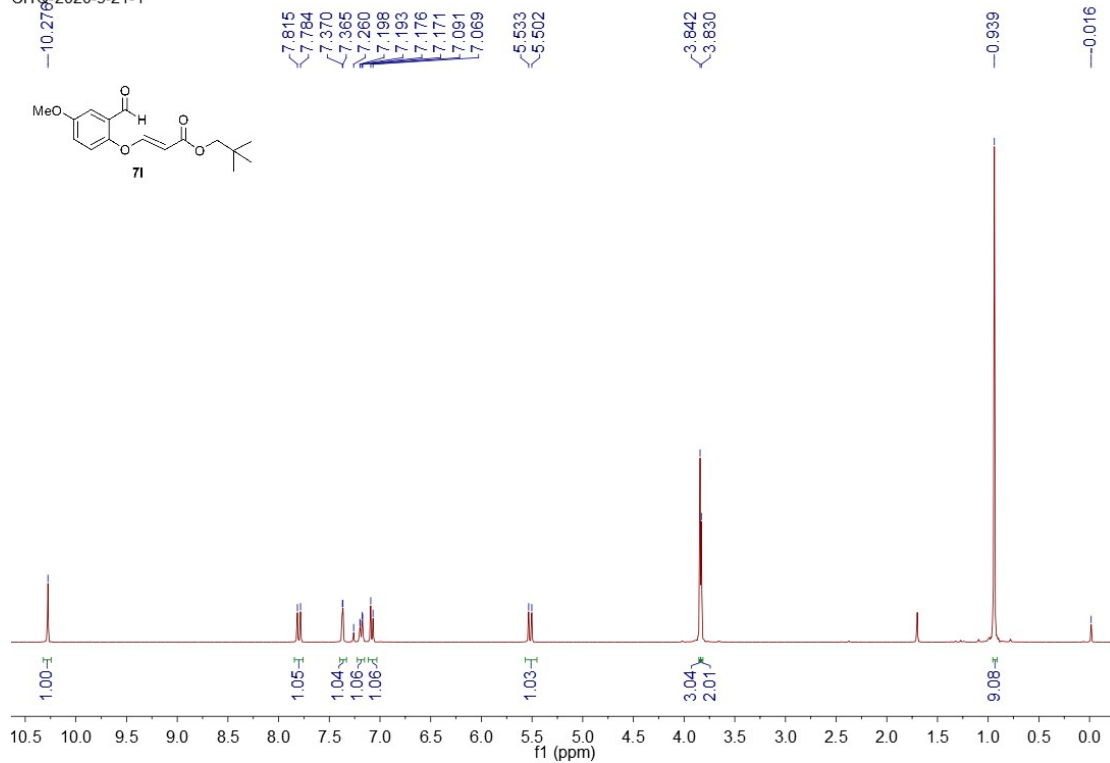

CHQ-2020-9-21-1

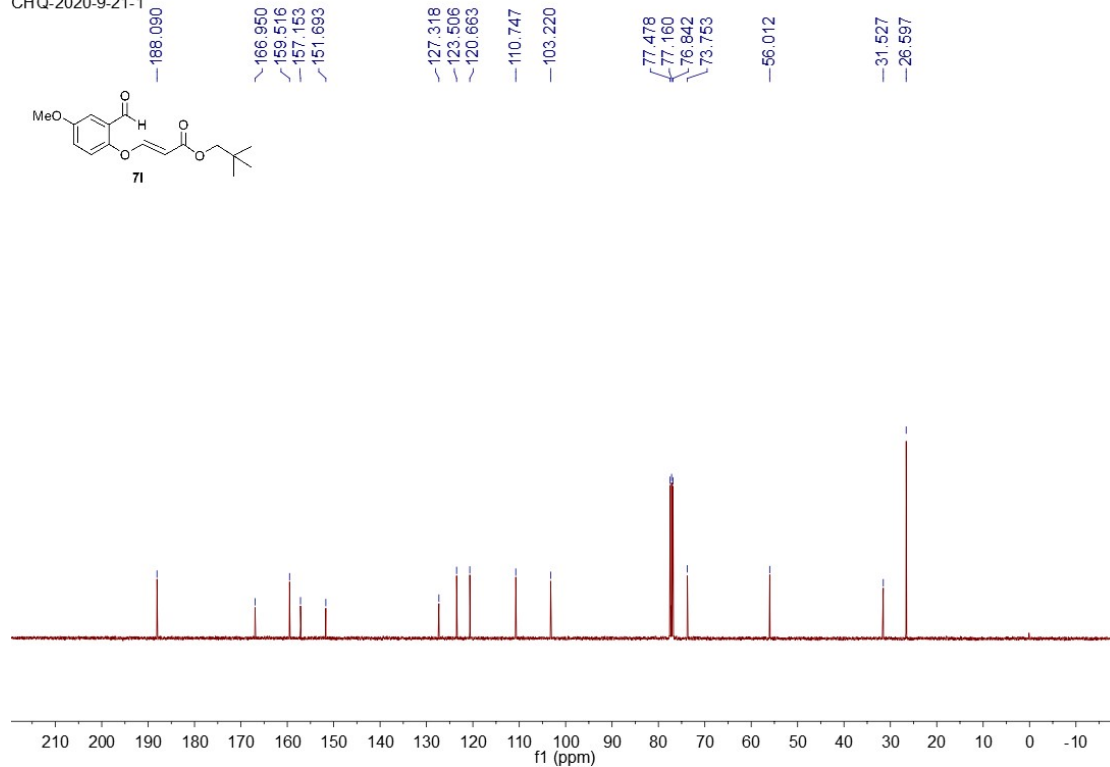

CHQ-2020-9-18-1

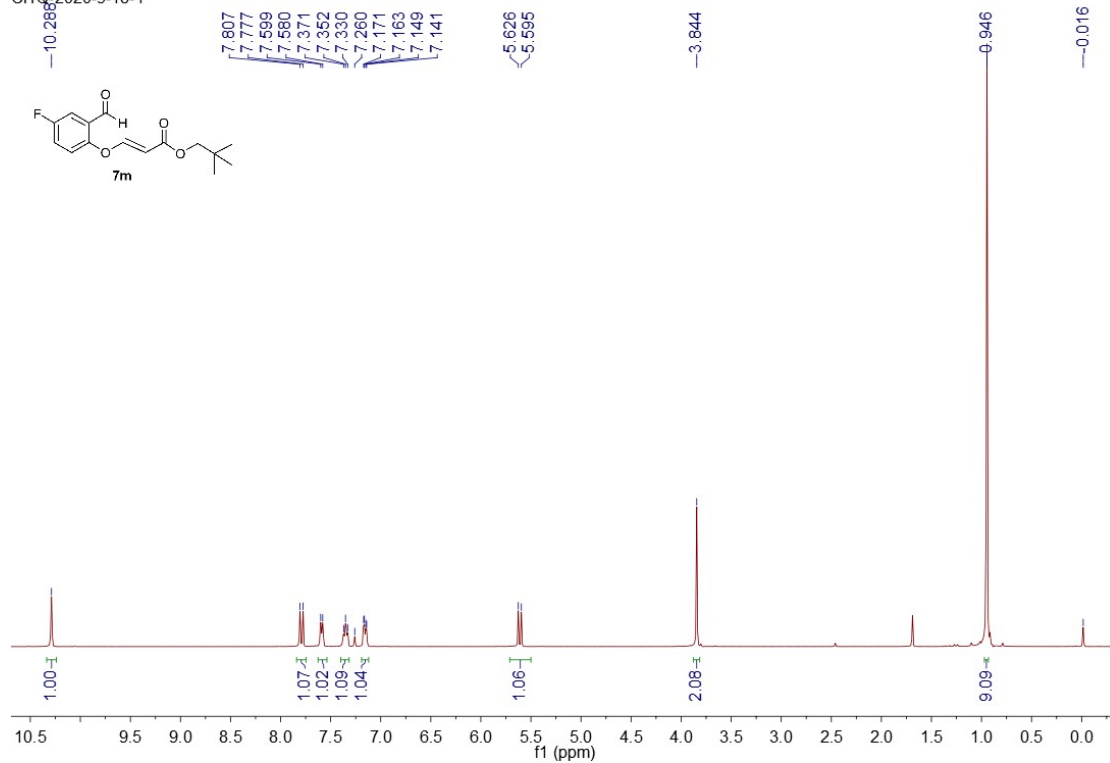

CHQ-2020-9-18-1

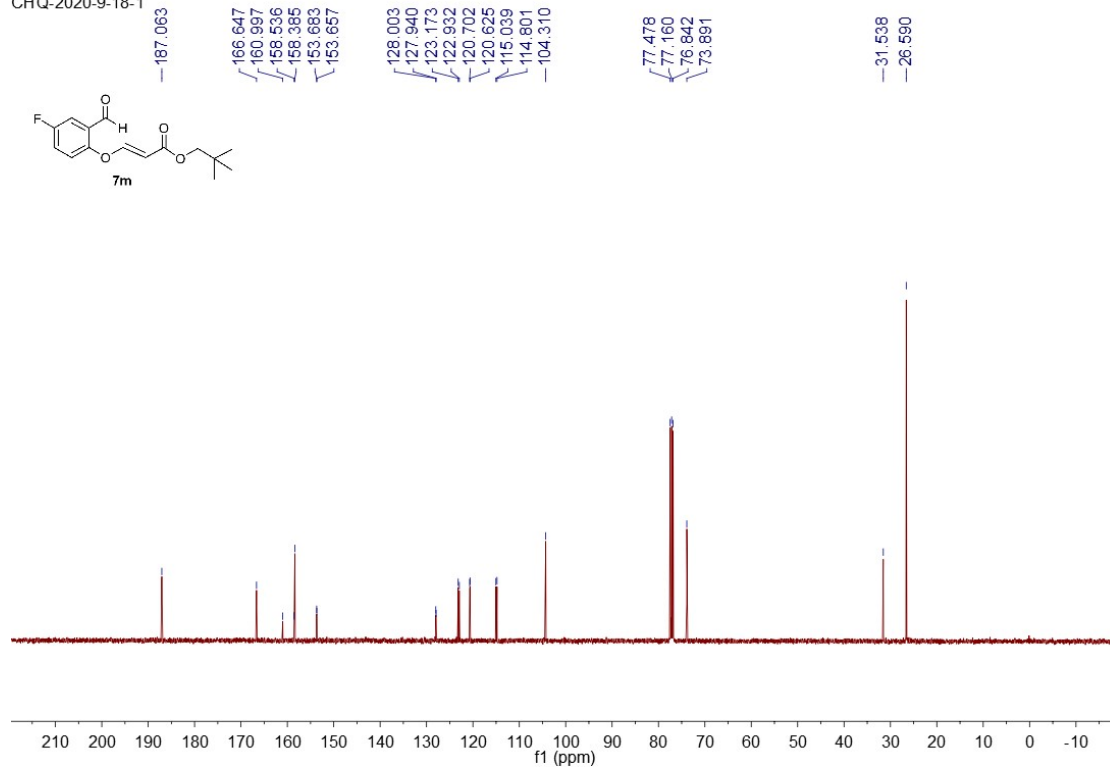

CHQ-2020-12-24-1

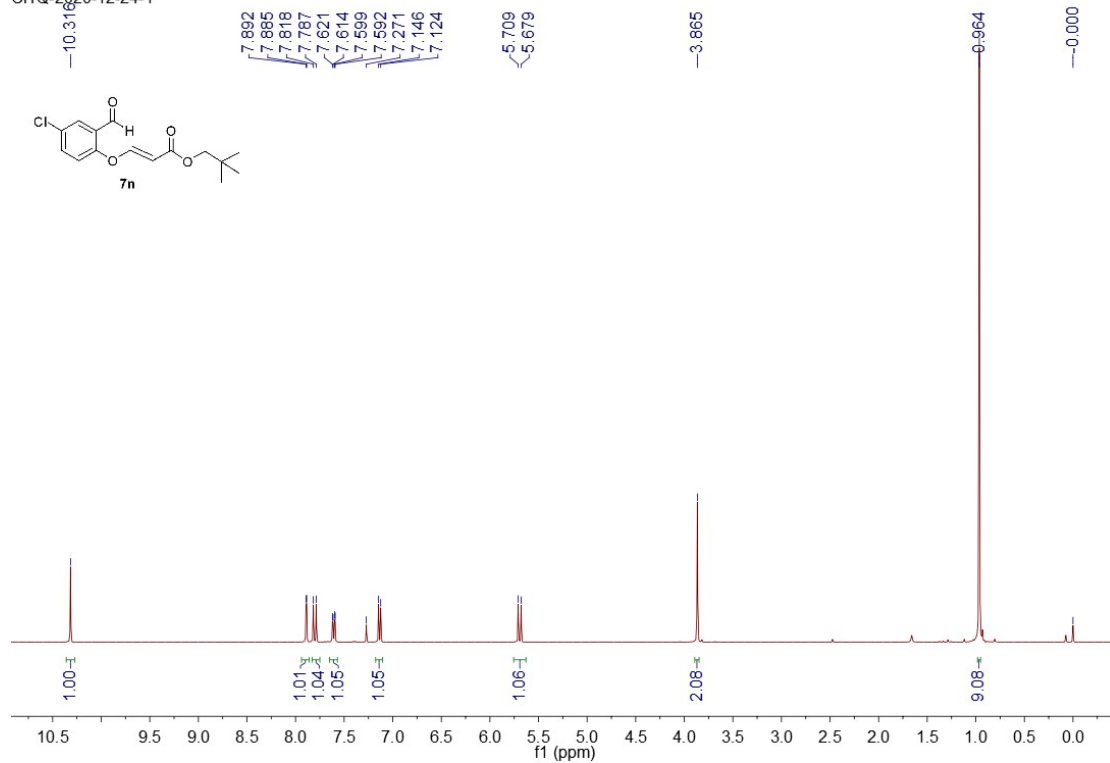

CHQ-2020-12-24-1

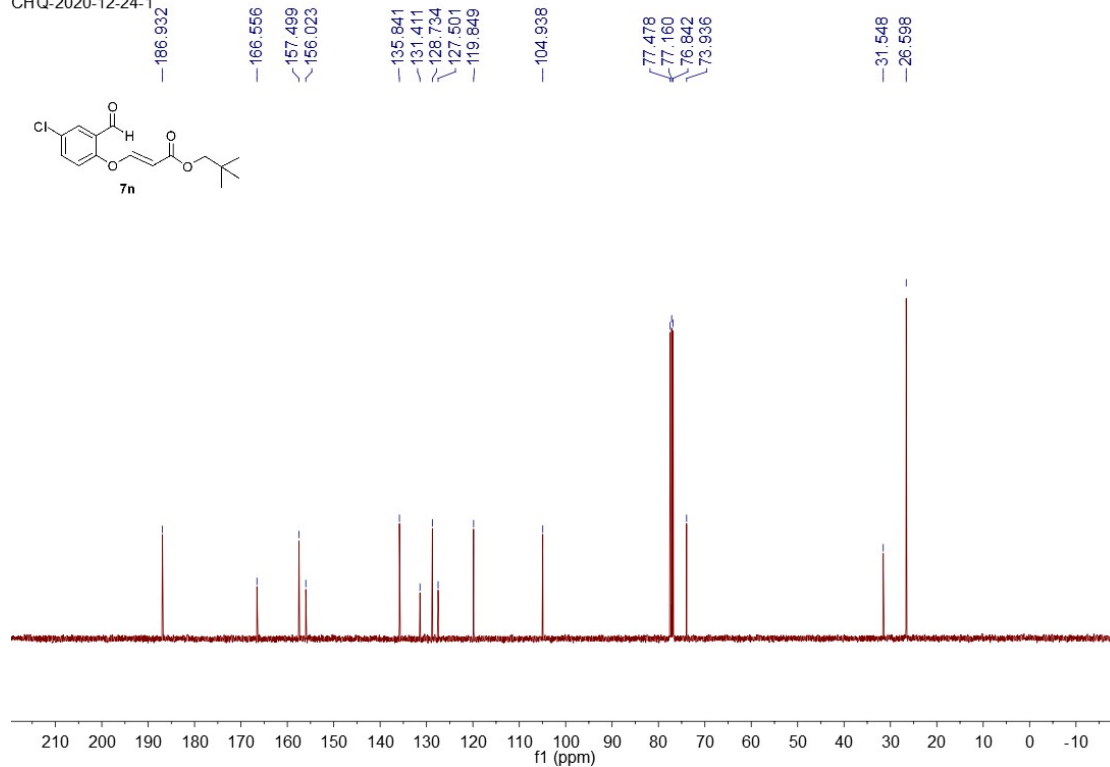



CHQ-2020-1018-6

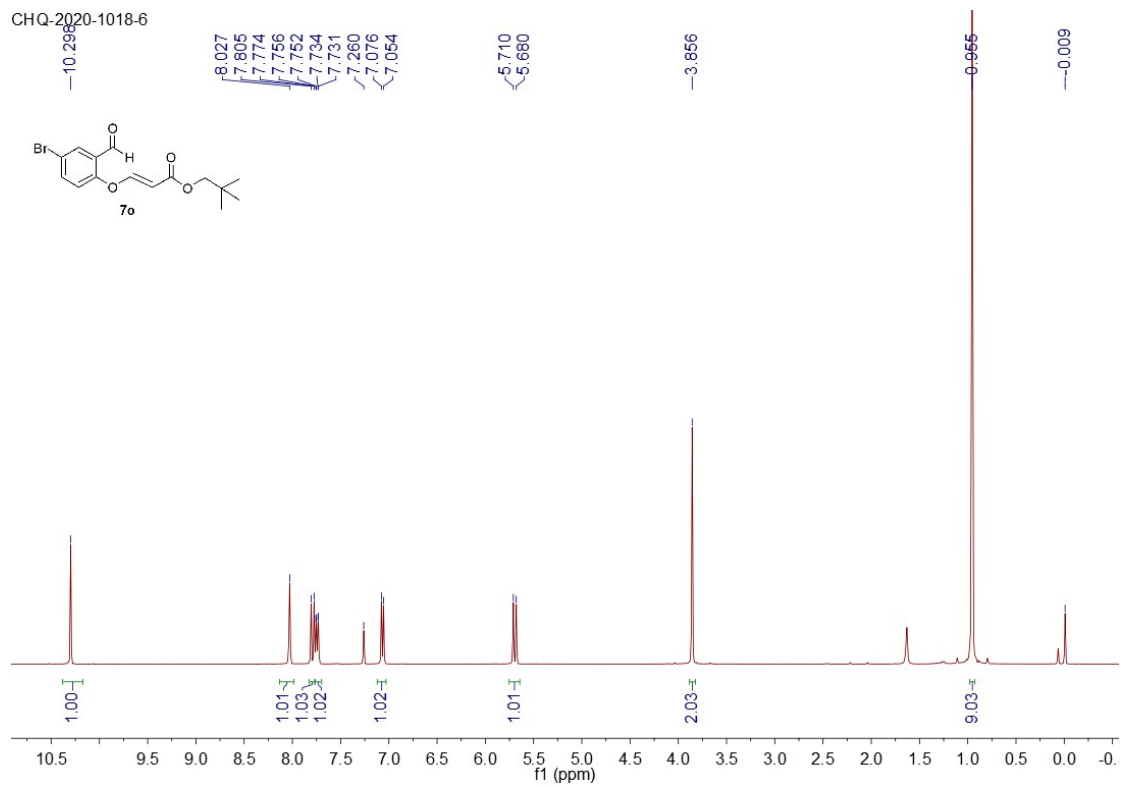

CHQ-2020-10-18-6

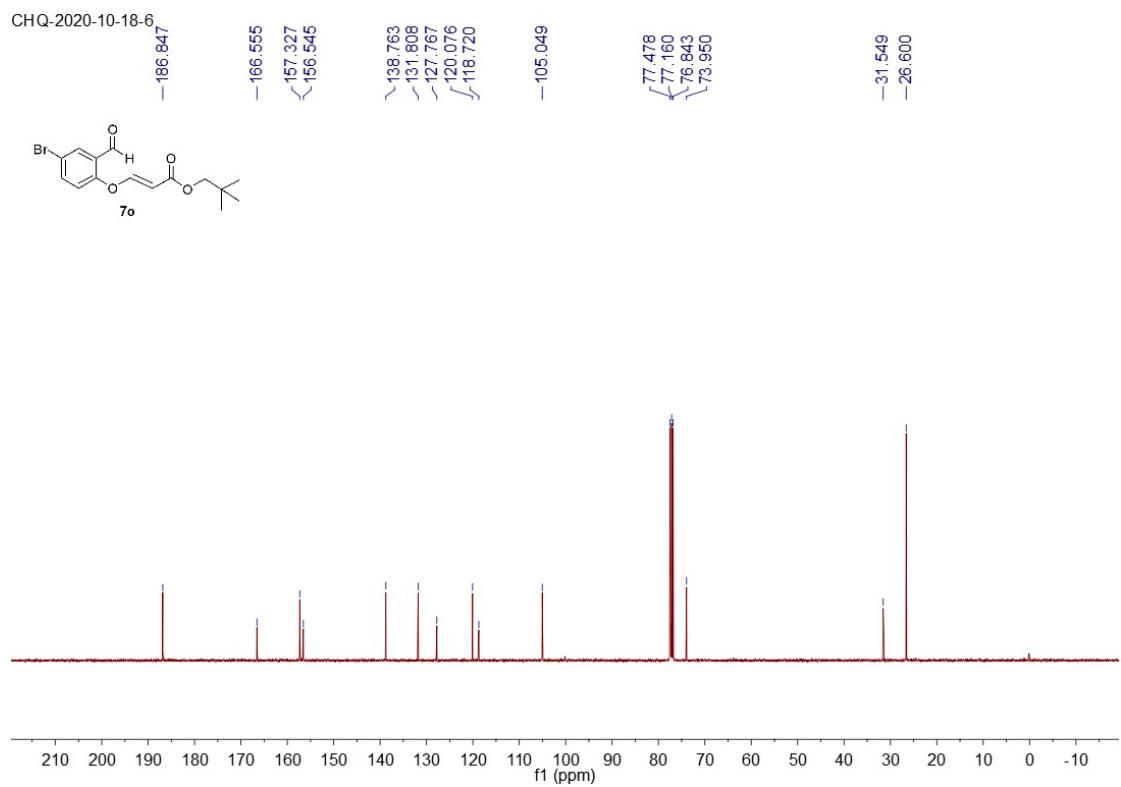

CHQ-2020-12-11-1

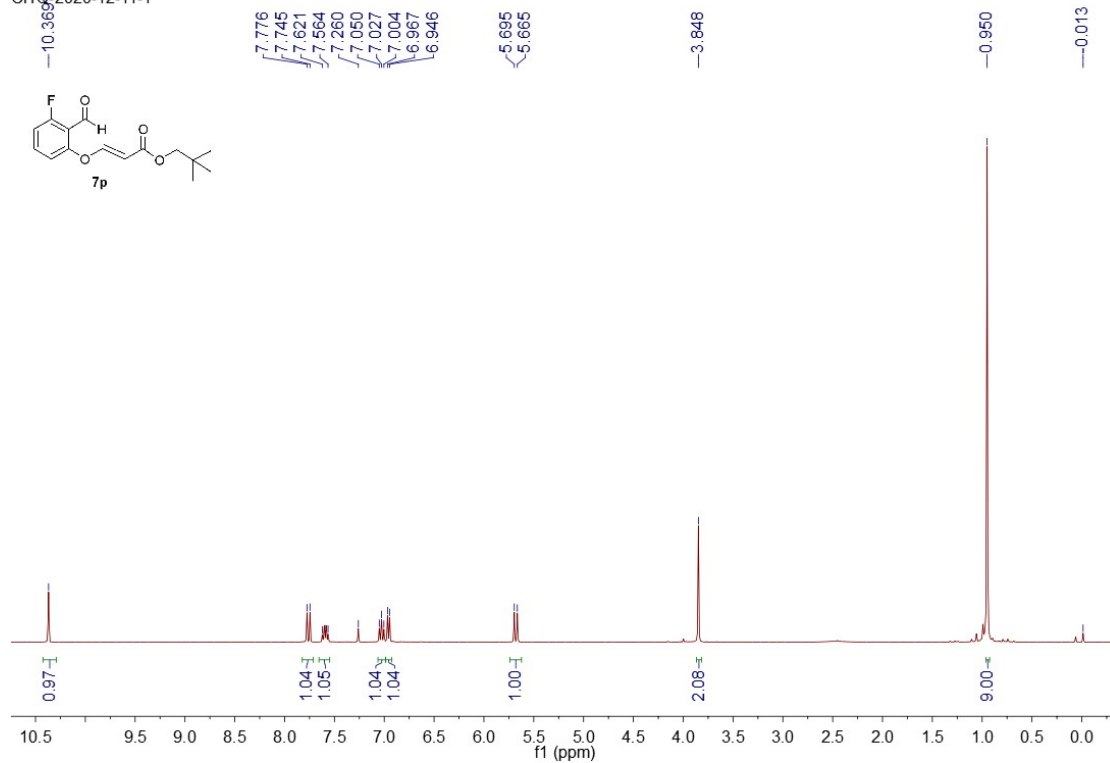

CHQ-2020-12-11-1

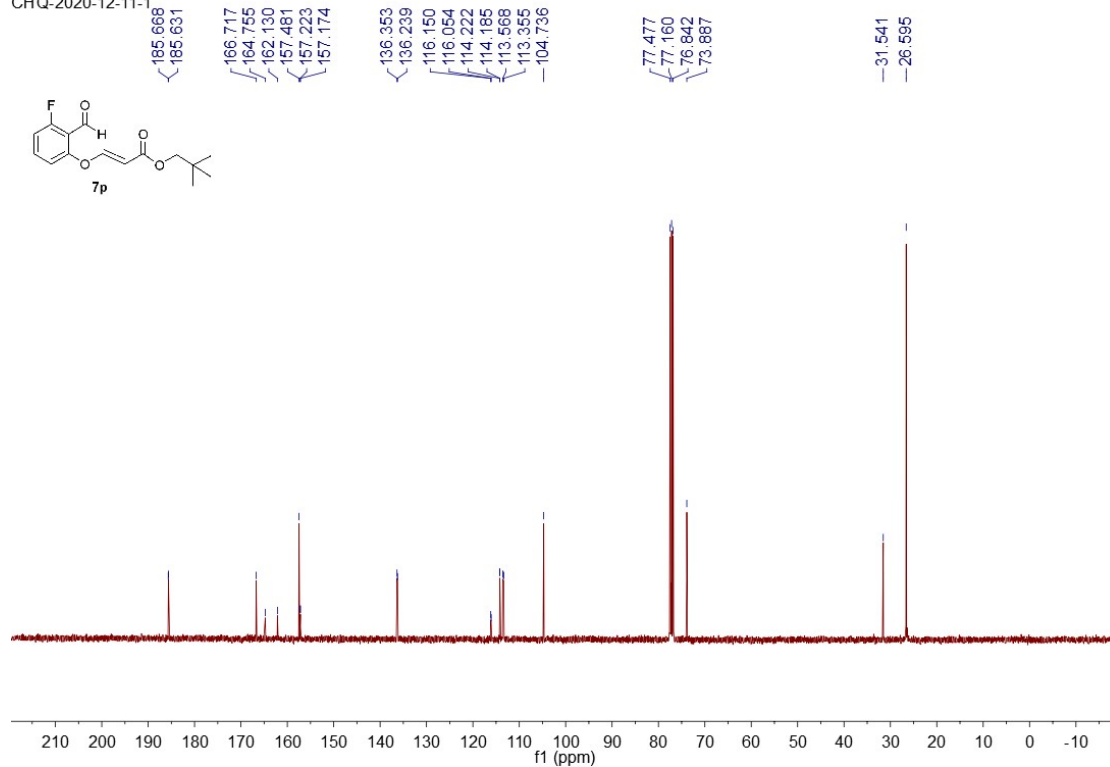

CHQ-2020-12-22-1

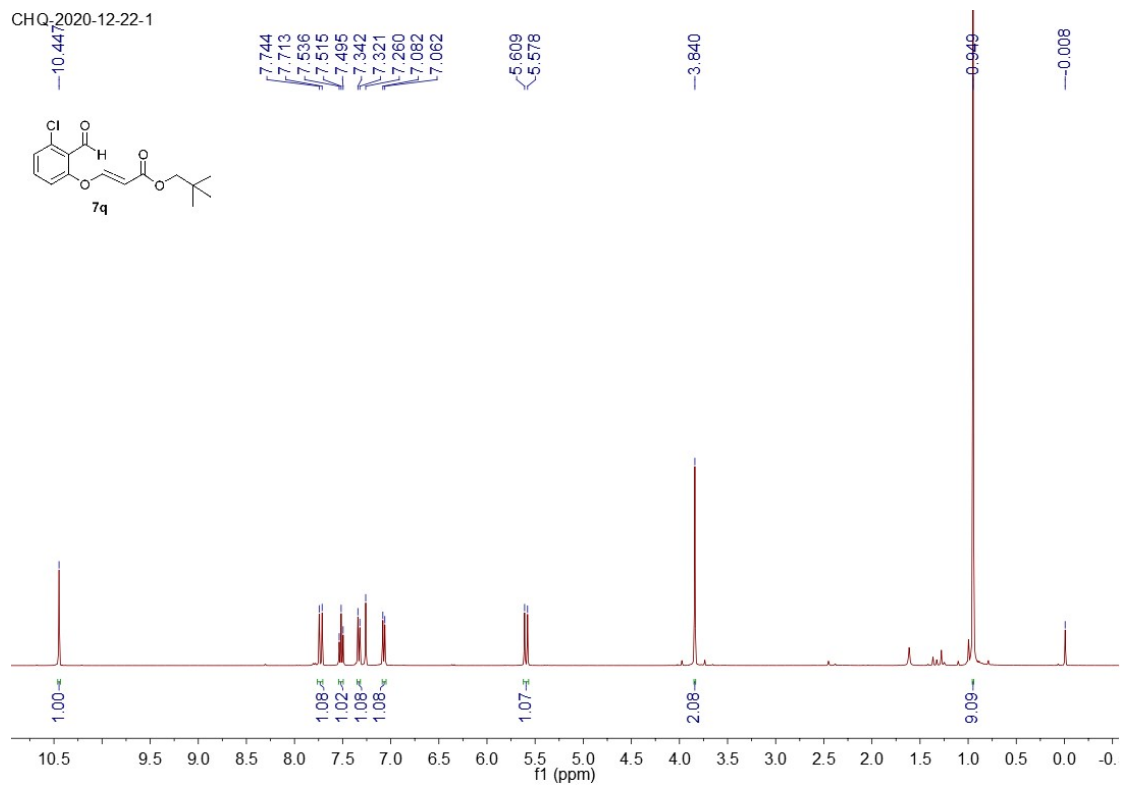

CHQ-2020-12-22-1

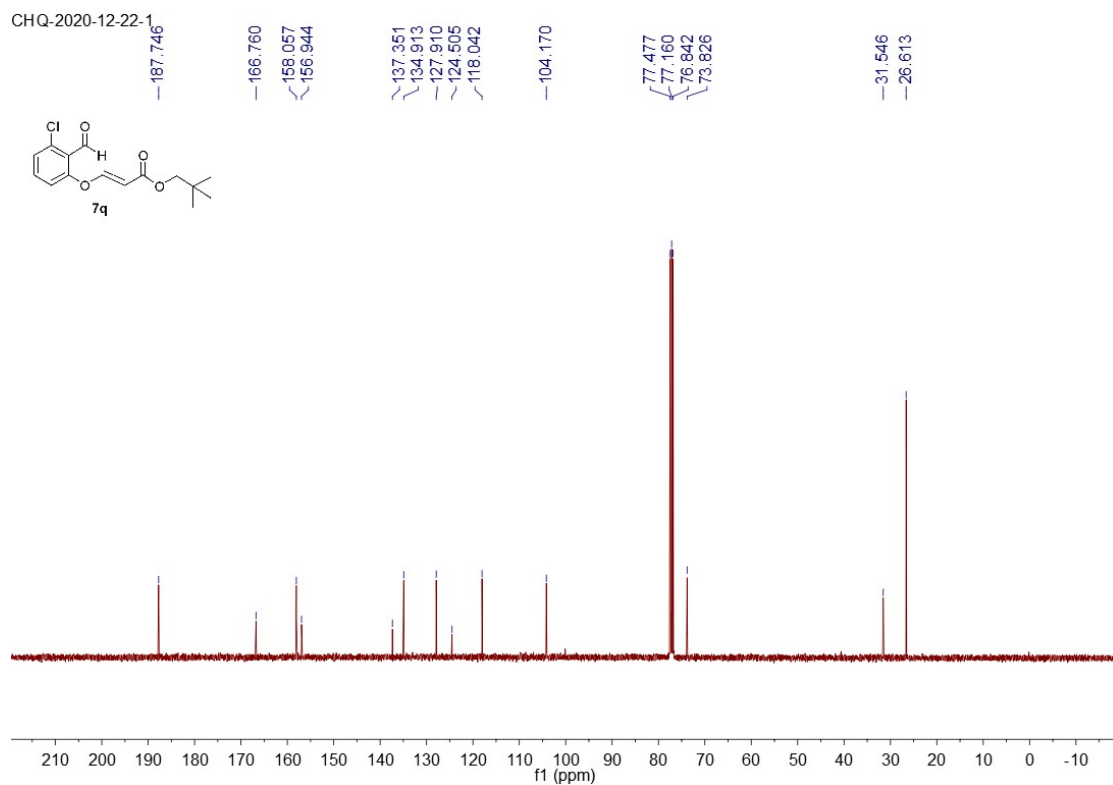

CHQ-2020-12-29-1

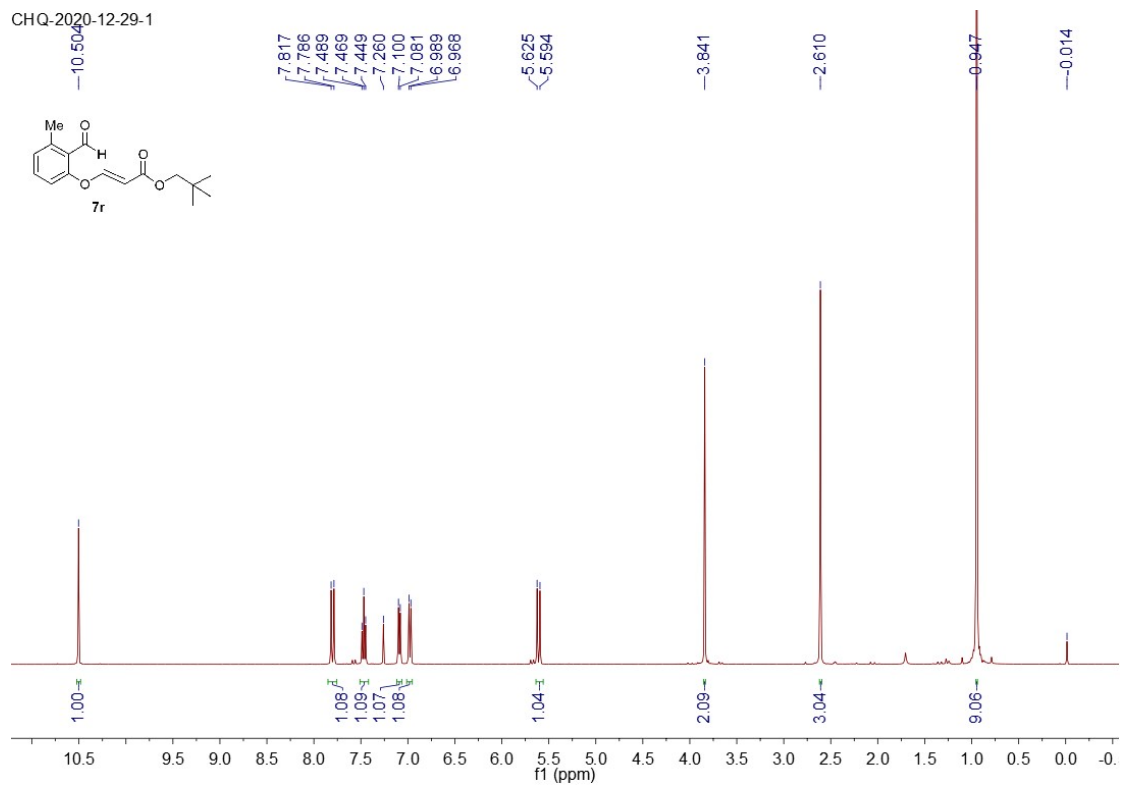

CHQ-2020-12-29-1

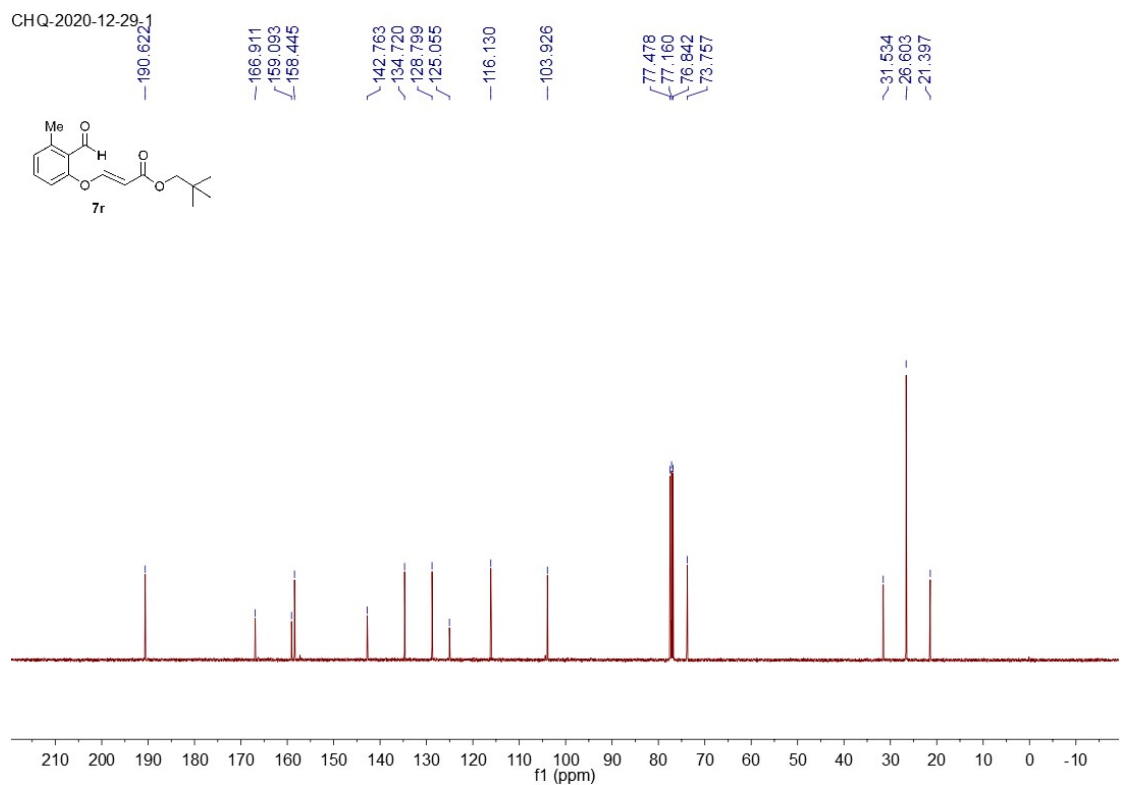

CHQ-2020-12-18-1

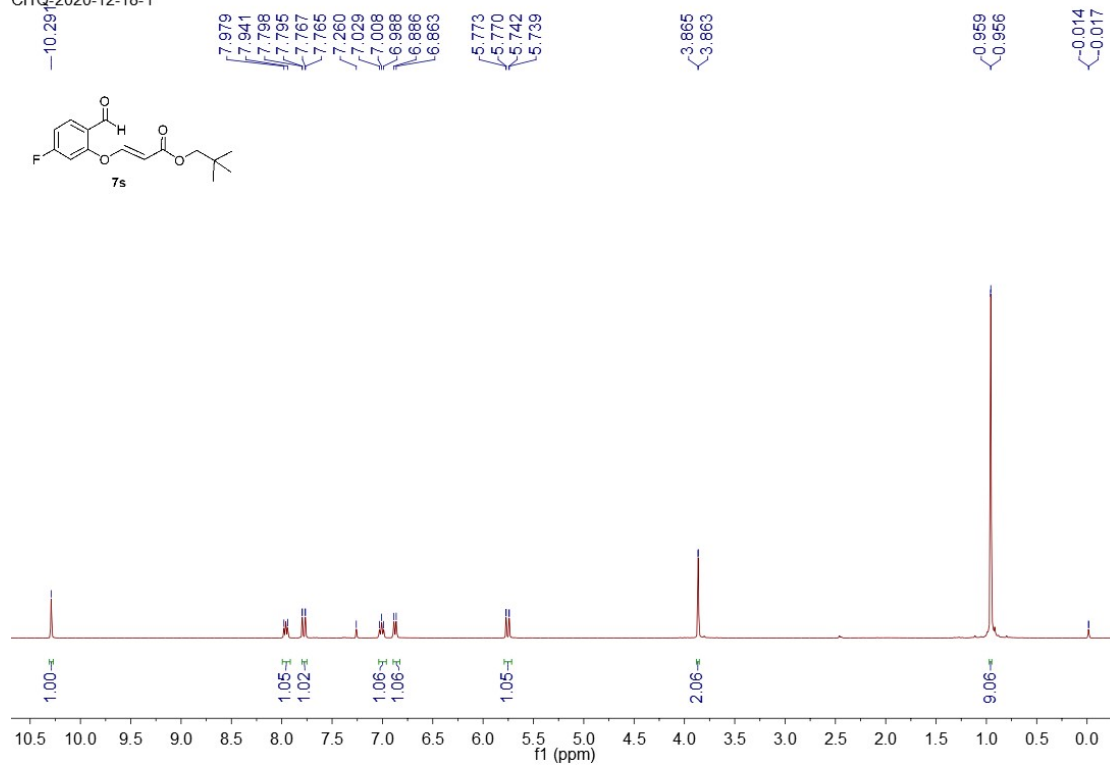

CHQ-2020-12-18-1

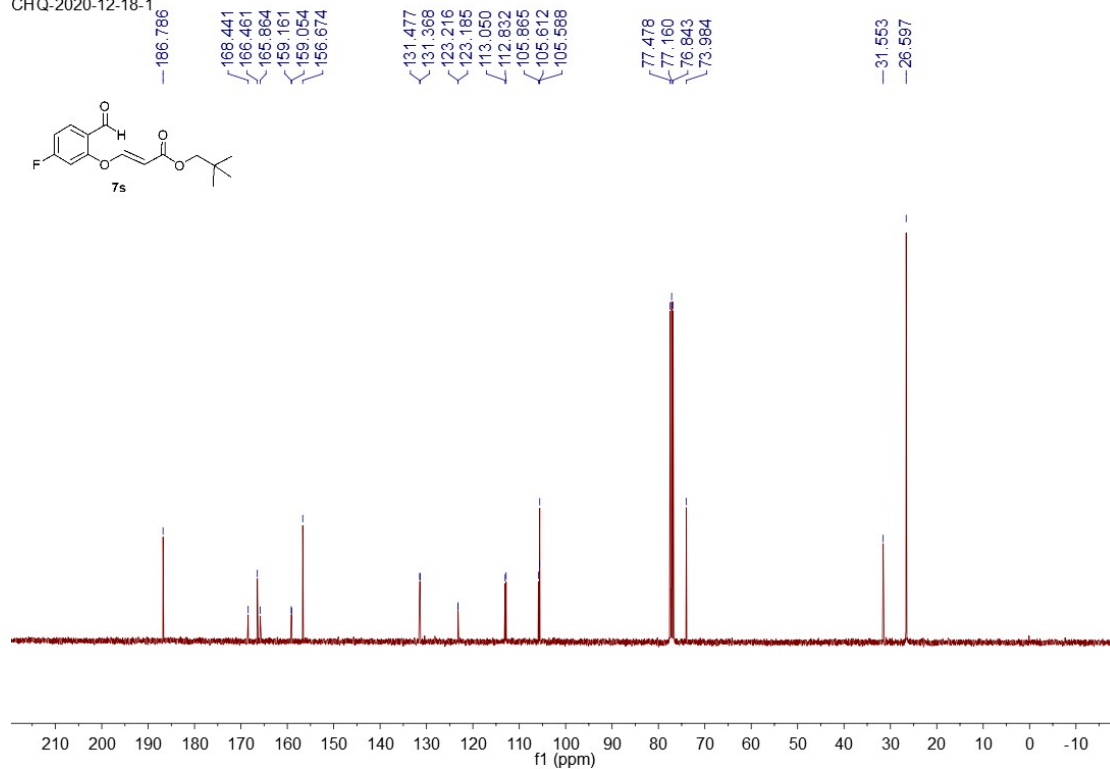

CHQ-2020-12-18-3

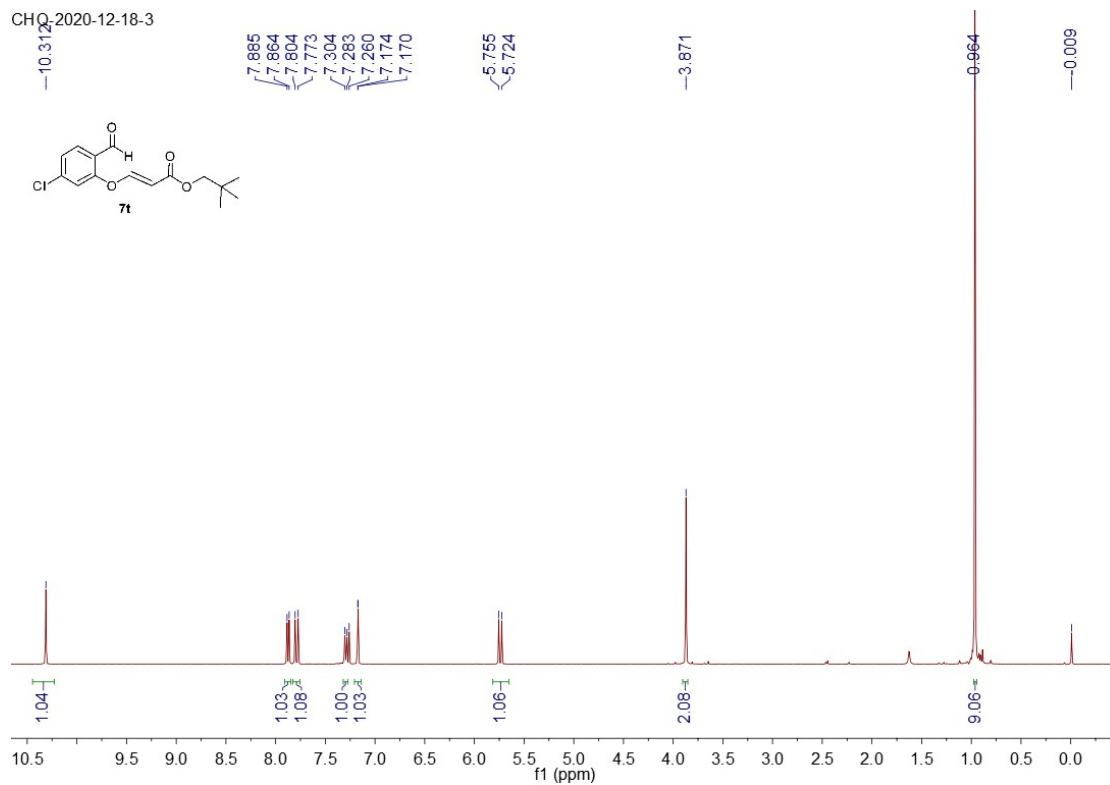

CHQ-2020-12-18-3

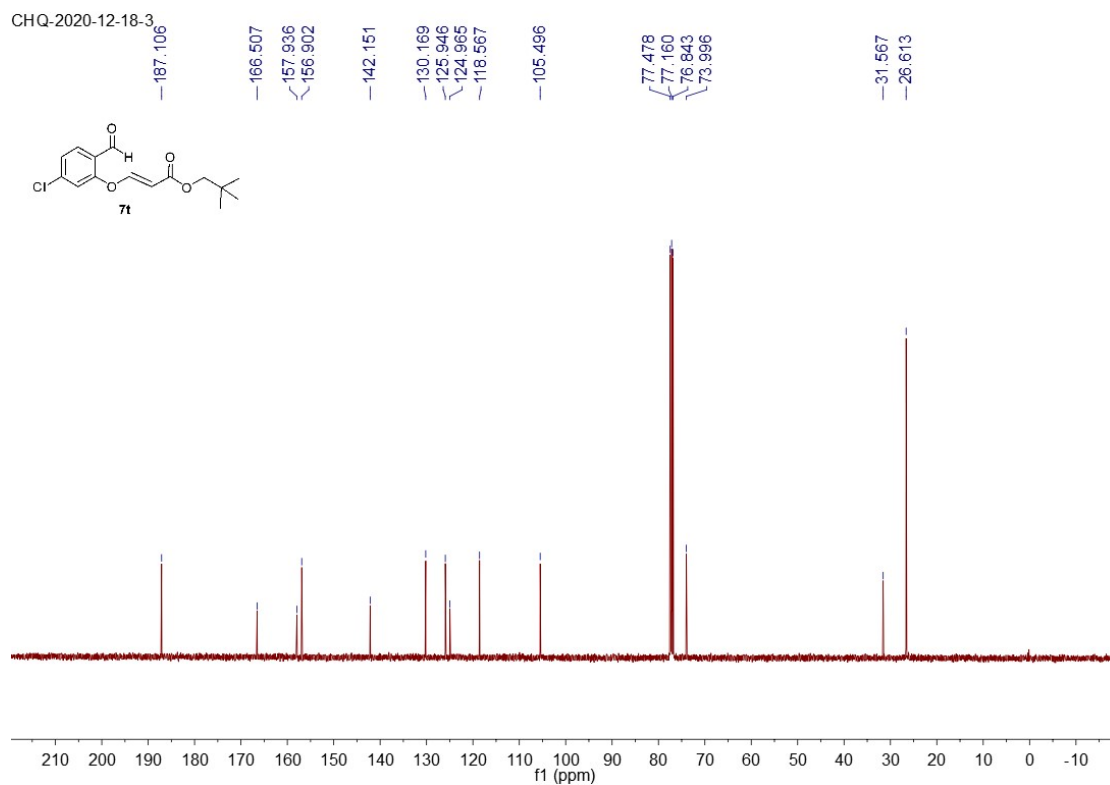

CHQ-2020-12-21-2

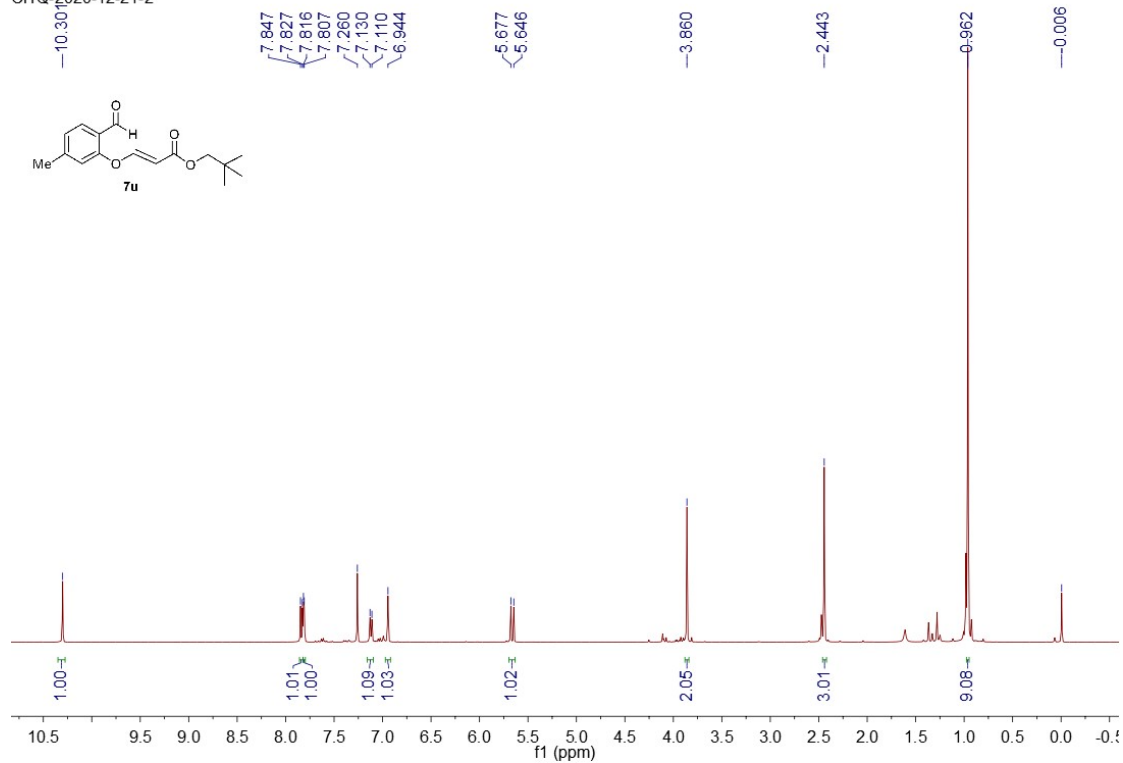

CHQ-2020-12-21-2

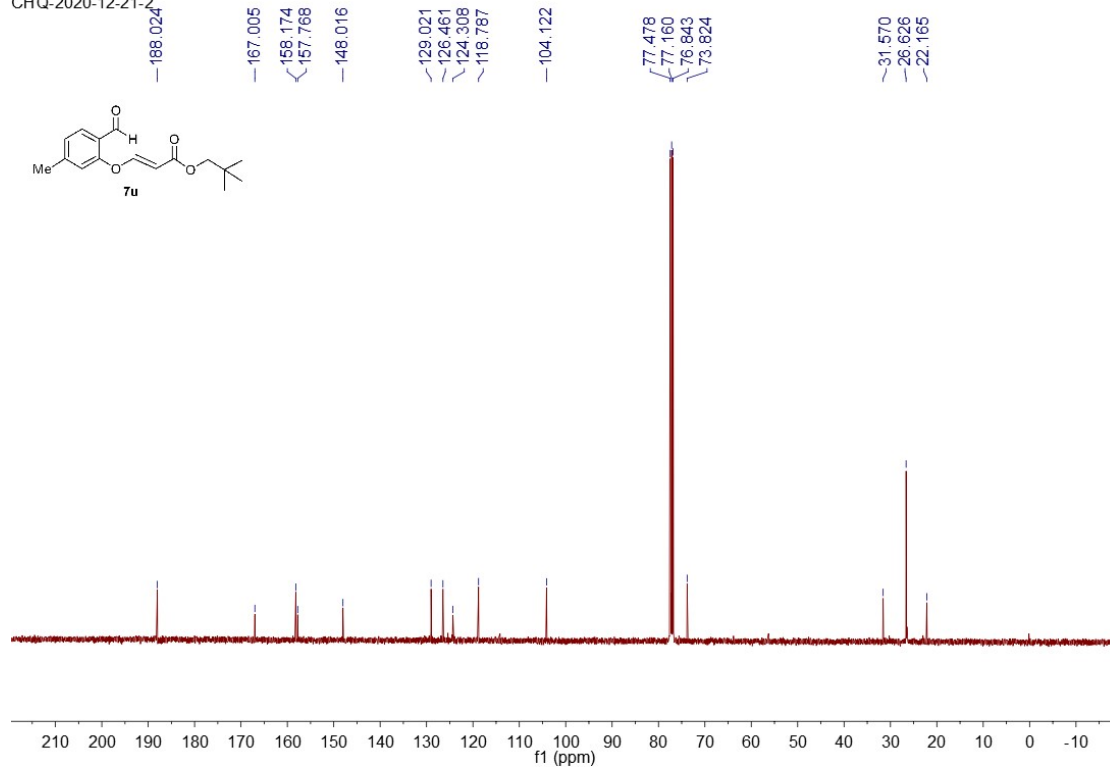

CHQ-2020-12-18-2

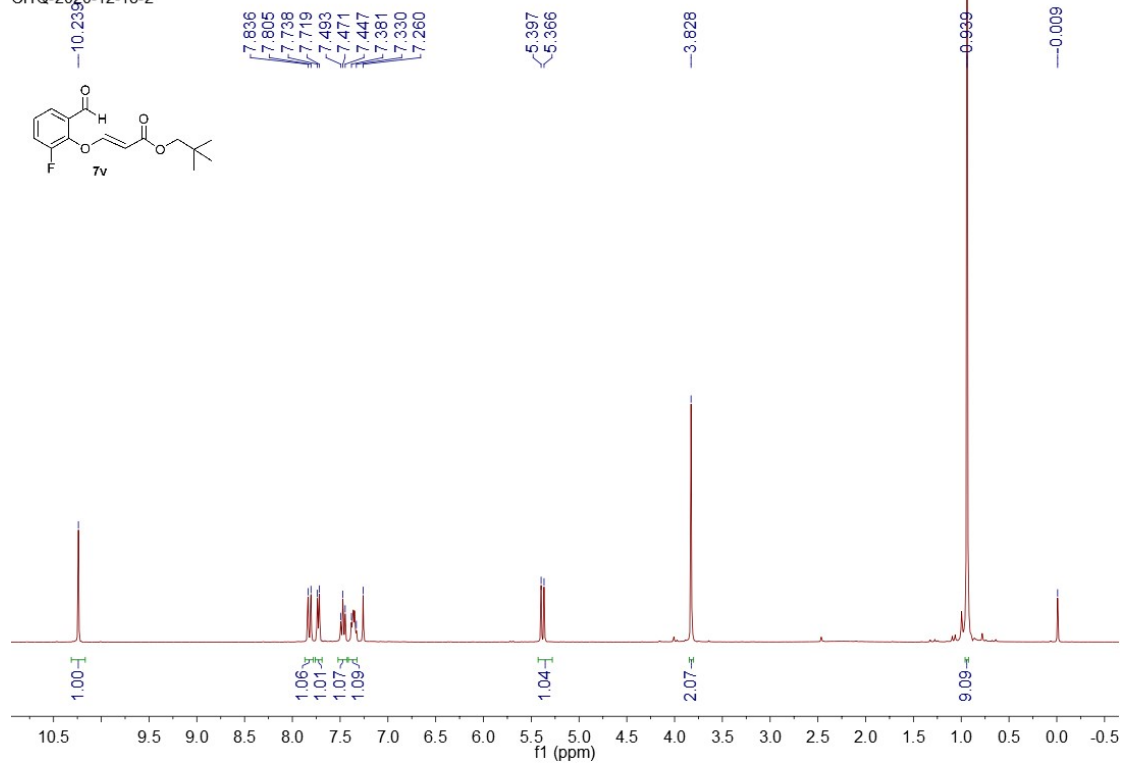

CHQ-2020-12-18-2

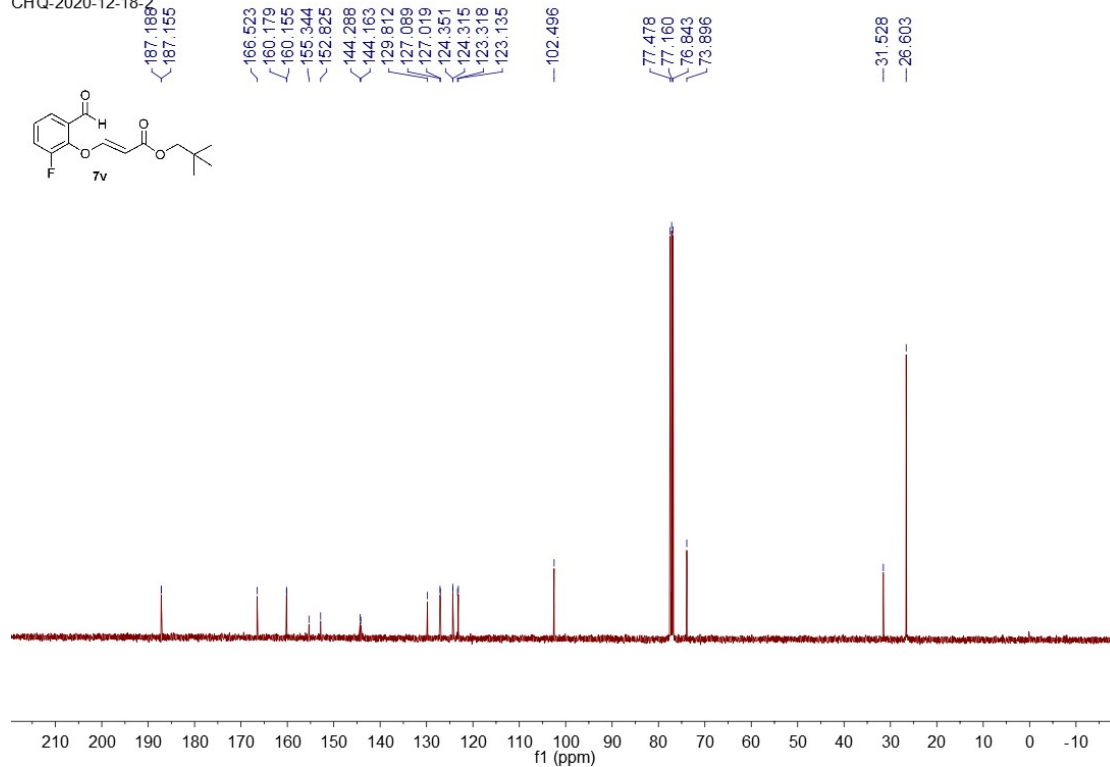



CHQ-2020-12-18-2

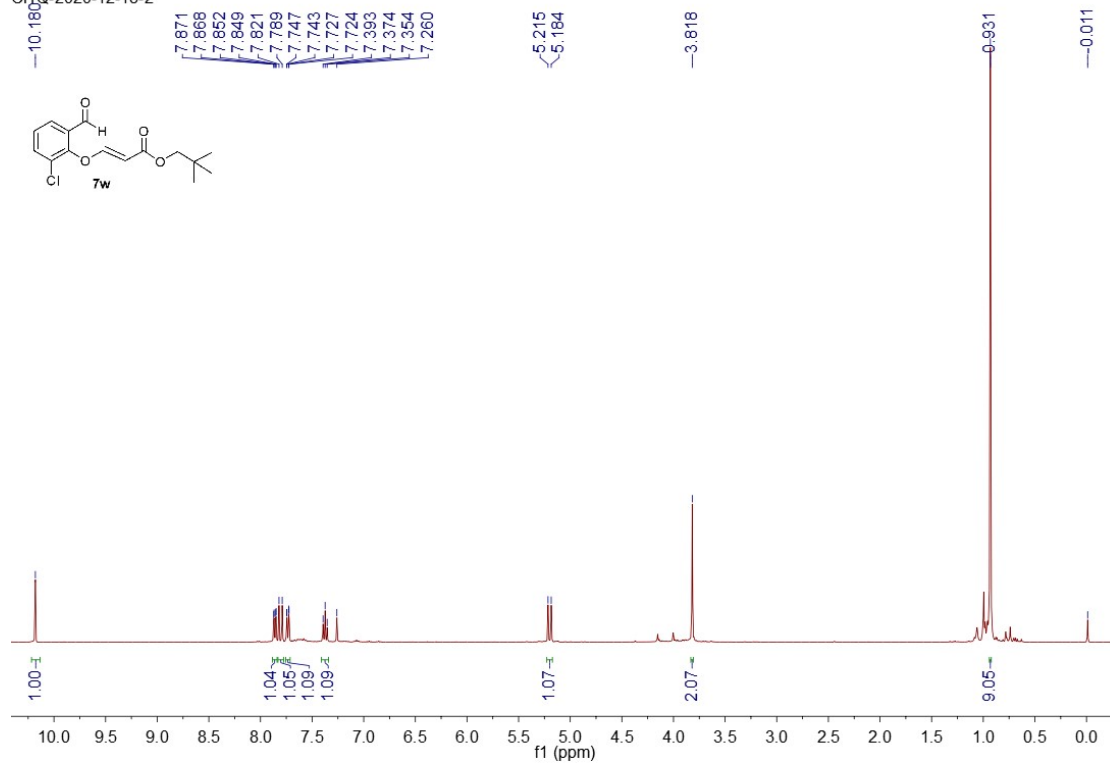

CHQ-2020-12-18-2

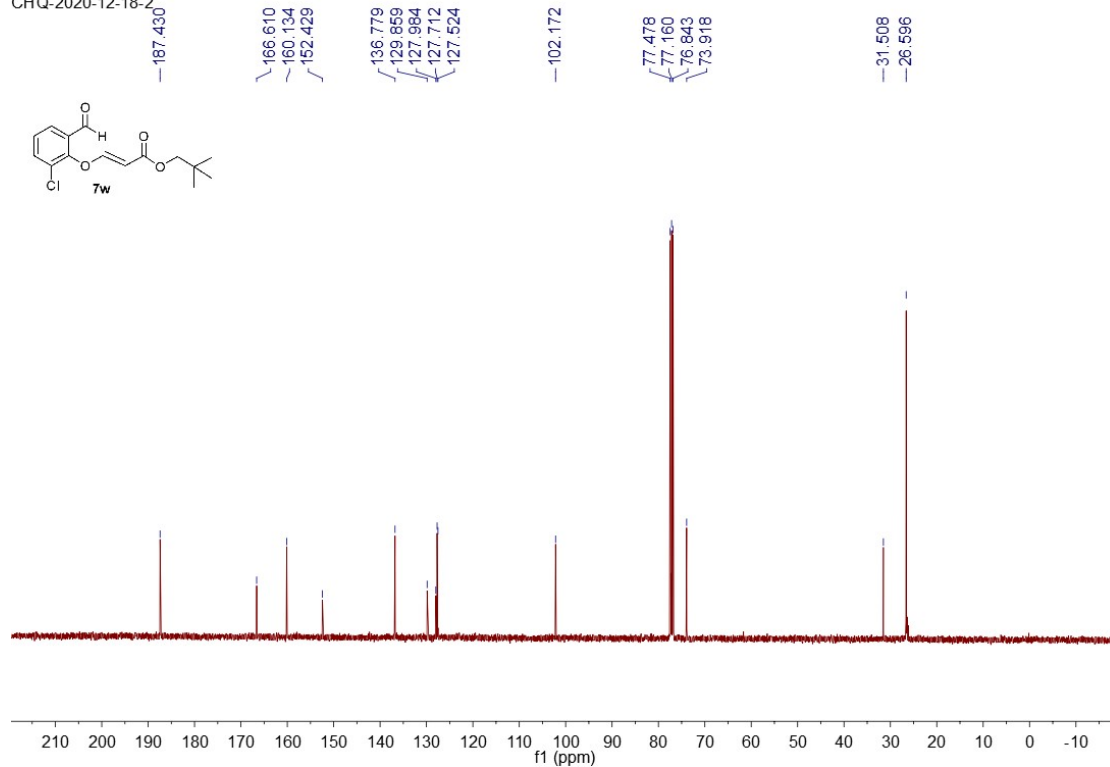

CHQ-2020-12-22-2

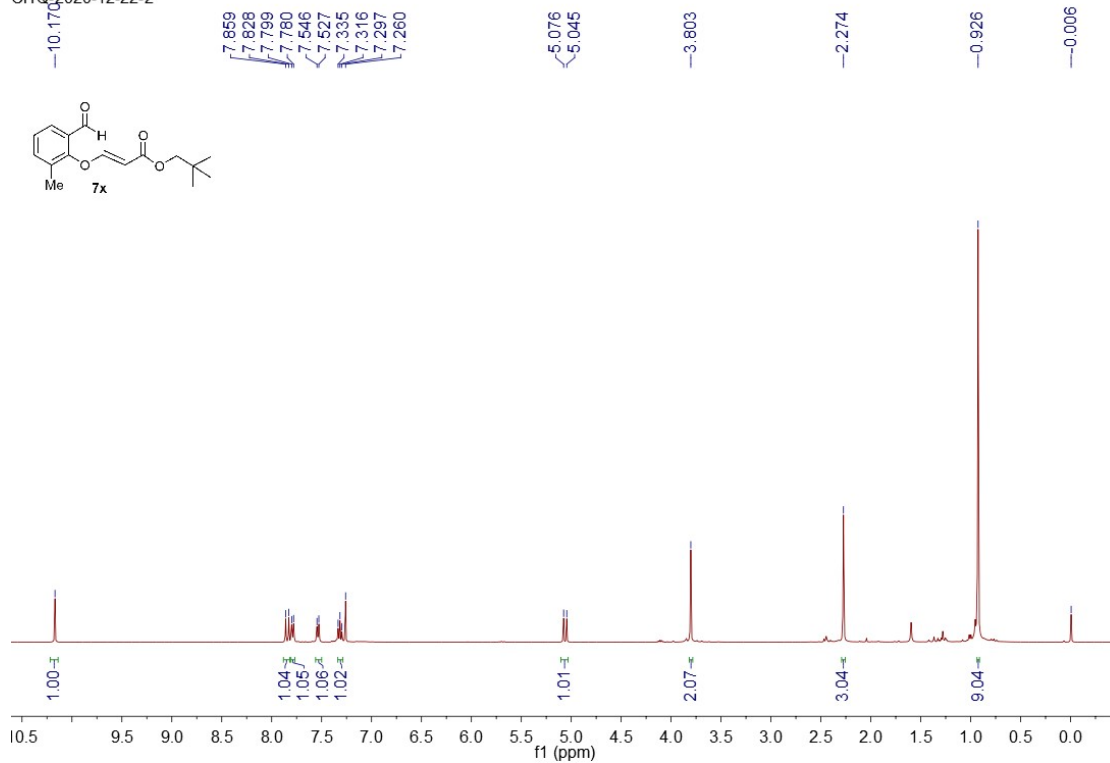

CHQ-2020-12-22-2

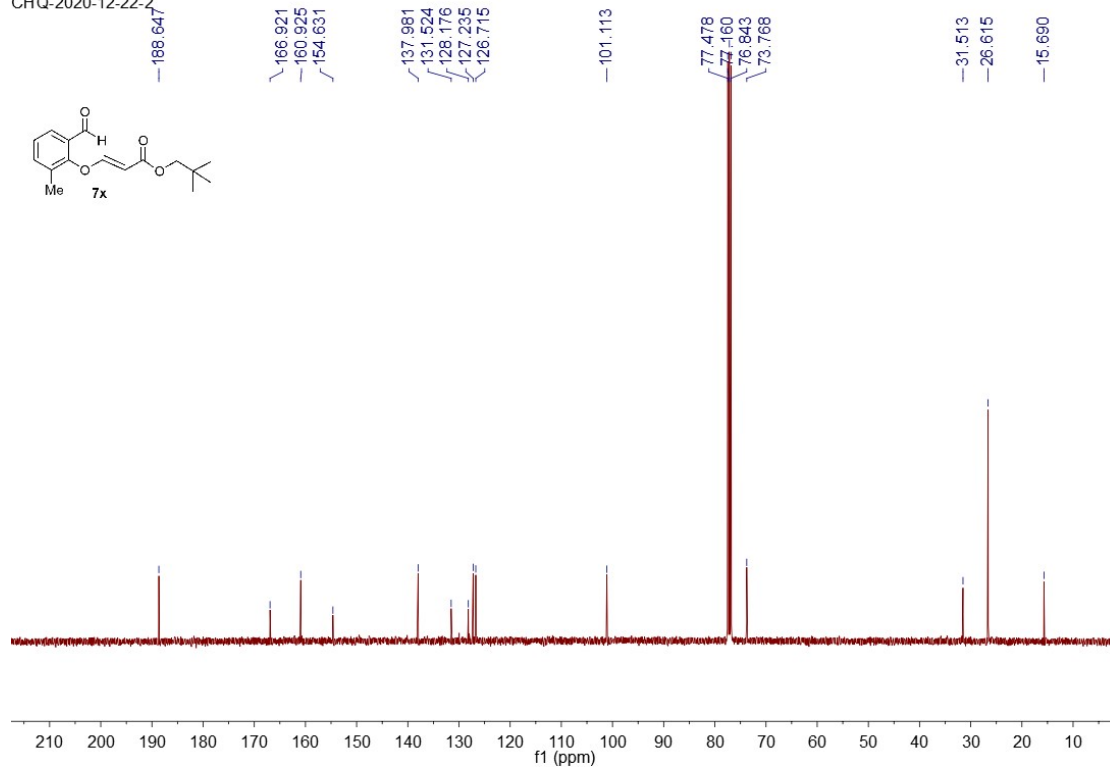

CHQ-2020-7-28-1

7.791  
7.760  
7.512  
7.490  
7.410  
7.368  
7.281  
7.260  
7.243  
7.079  
7.059

5.639  
5.608  
5.359  
5.337  
4.852  
4.776  
4.288  
4.265

3.619  
3.607  
3.596  
3.375  
3.180

1.365  
1.348

-0.011

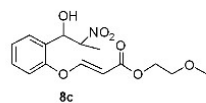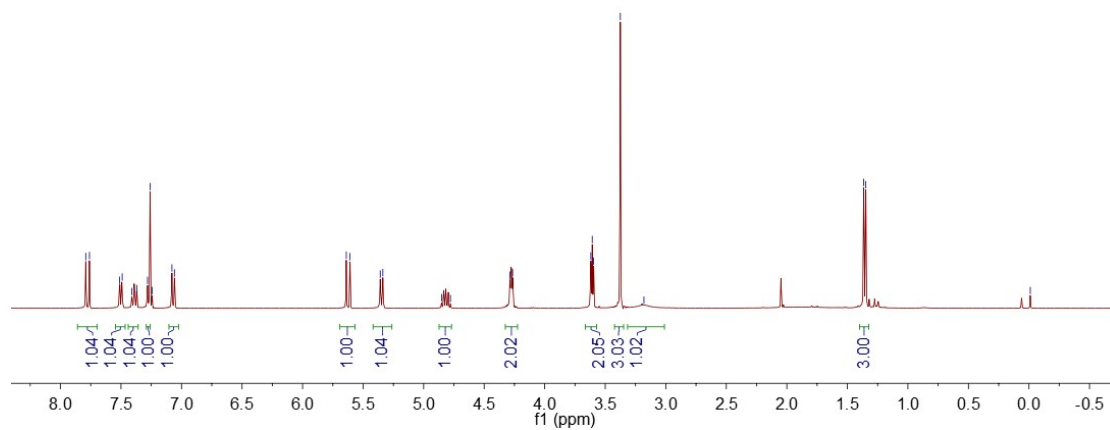

CHQ-2020-7-28-1

166.970  
158.887  
152.920

130.574  
129.263  
128.597  
128.048  
118.176

103.110

88.139

77.478  
77.160  
76.843  
70.606  
70.281  
63.473  
59.079

16.336

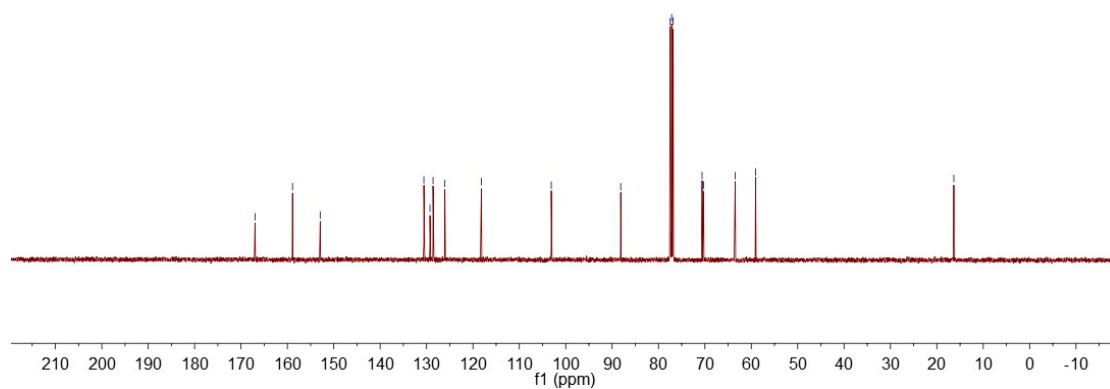

CHQ-2020-7-24-1

7.755  
7.724  
7.512  
7.490  
7.415  
7.372  
7.278  
7.260  
7.241  
7.080  
7.060

5.631  
5.600  
5.376  
5.354  
4.864  
4.791  
4.139  
4.122  
4.105

-3.076

1.664  
1.611  
1.377  
1.359  
1.324  
1.248  
0.893  
0.876  
0.859

-0.007

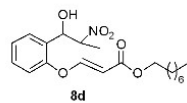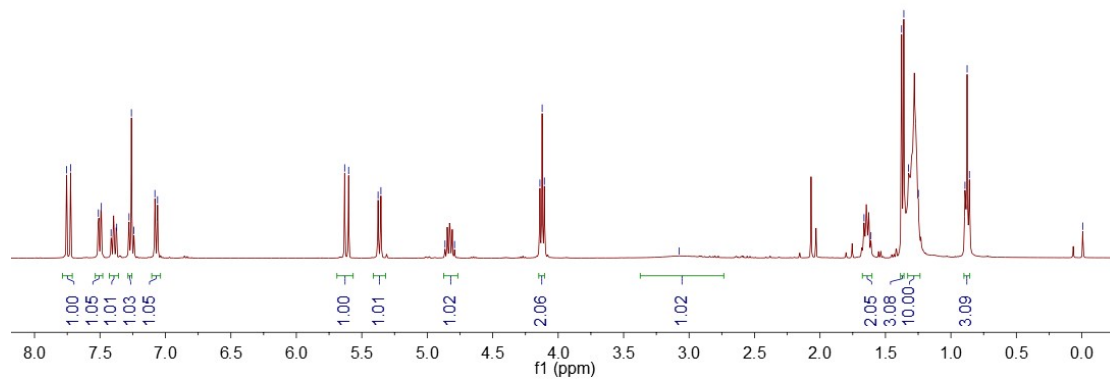

CHQ-2020-7-24-1

-167.147  
-158.237  
-153.068

130.587  
129.077  
128.598  
125.912  
117.907

-103.708

-88.121

77.478  
77.160  
76.842  
70.399  
64.811

31.906  
29.348  
29.298  
28.789  
26.068  
22.758  
16.356  
14.202

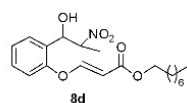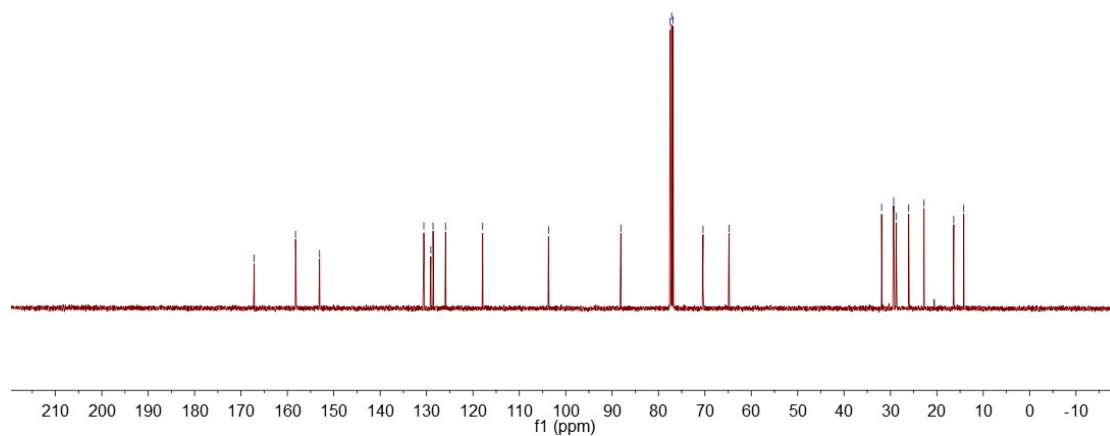

CHQ-2020-7-13-1

7.740  
7.709  
7.507  
7.487  
7.416  
7.374  
7.276  
7.260  
7.238  
7.085  
7.064

5.601  
5.571  
5.372  
5.350  
5.115  
5.099  
5.083  
5.068  
5.052  
5.037  
5.021  
4.866  
4.793

—3.036

1.379  
1.362  
1.271  
1.255

—0.006

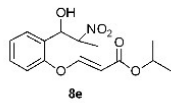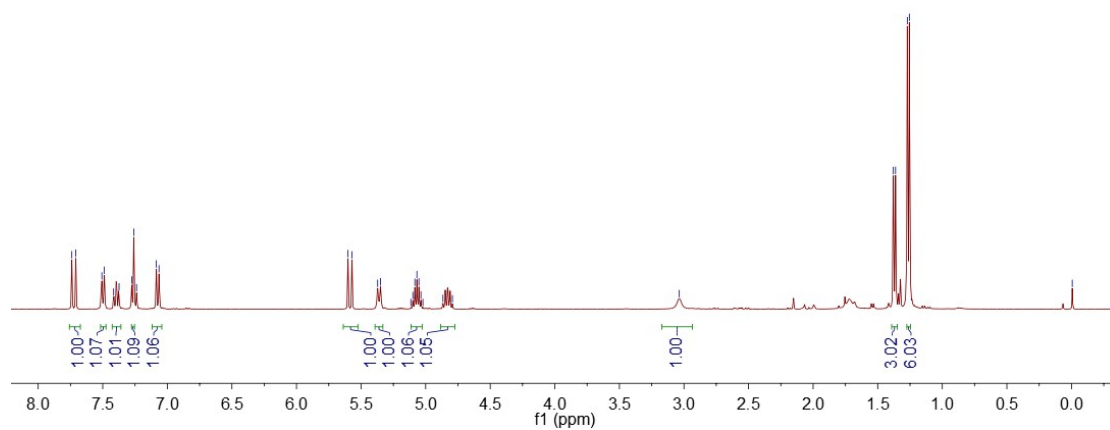

CHQ-2020-7-13-1

—166.557

—158.069

—153.069

130.584

129.073

128.587

125.881

117.958

—104.153

—88.126

77.477

77.160

76.842

70.439

67.955

—22.028

—16.373

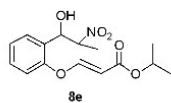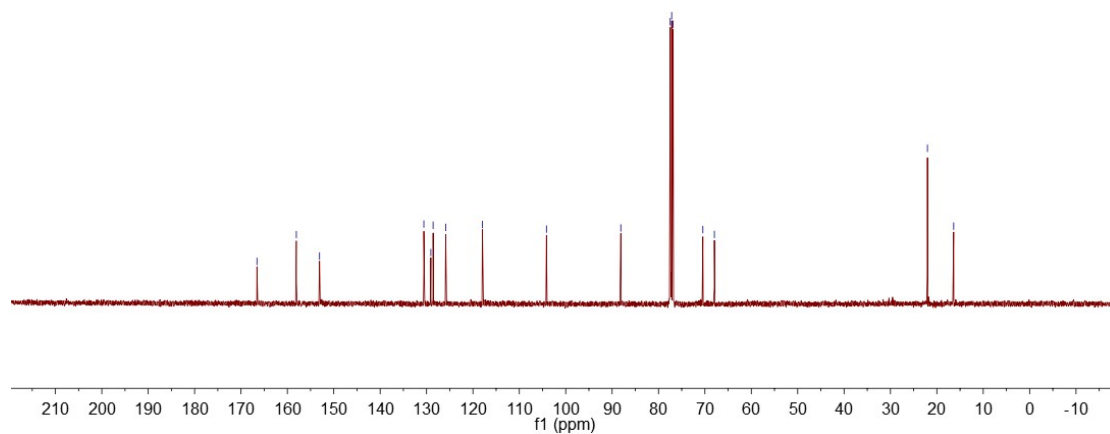

CHQ-2020-7-16-1

7.759  
7.729  
7.513  
7.490  
7.420  
7.377  
7.280  
7.260  
7.242  
7.081  
7.060

5.649  
5.619  
5.379  
5.358  
4.867  
4.794

3.926  
3.909

3.048

2.006  
1.989  
1.972  
1.956  
1.939  
1.922  
1.905  
1.378  
1.361

0.953  
0.937

-0.008

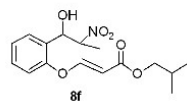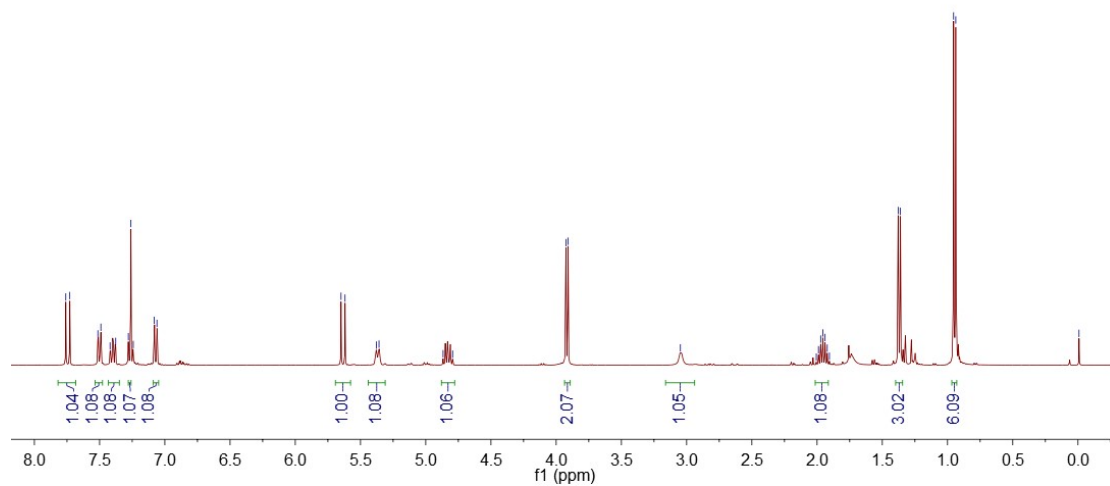

CHQ-2020-7-16-1

167.151  
158.215  
153.061

130.613  
129.019  
128.595  
125.916  
117.850

103.676

88.118  
77.478  
77.160  
76.842  
70.704  
70.388

27.889  
19.243  
16.351

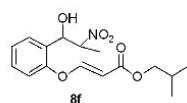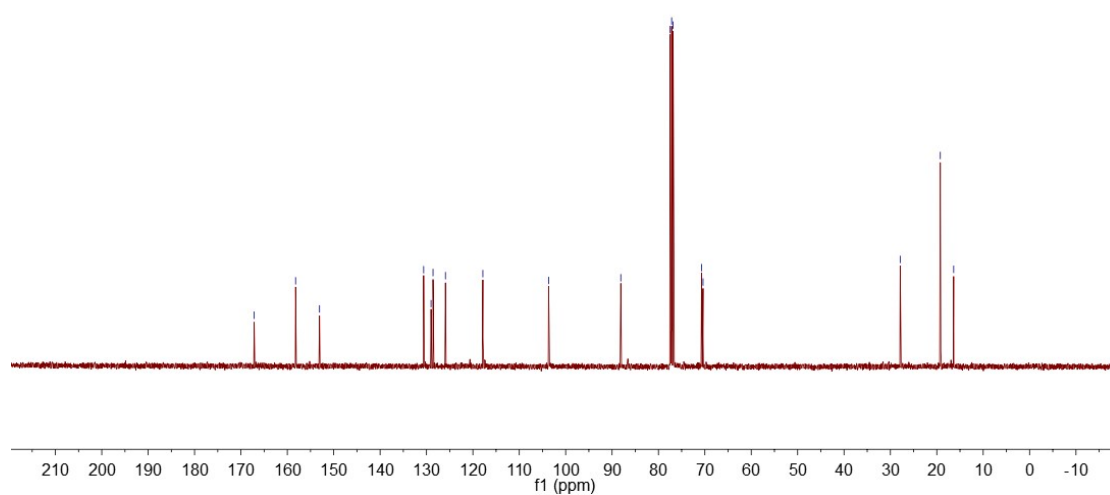

CHQ-2020-12-31-1  
 7.766  
 7.736  
 7.514  
 7.495  
 7.423  
 7.381  
 7.282  
 7.260  
 7.245  
 7.083  
 7.062

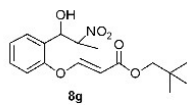

5.676  
 5.646  
 5.388  
 5.366  
 4.872  
 4.799  
 3.840  
 2.991  
 1.385  
 1.368  
 0.958  
 -0.006

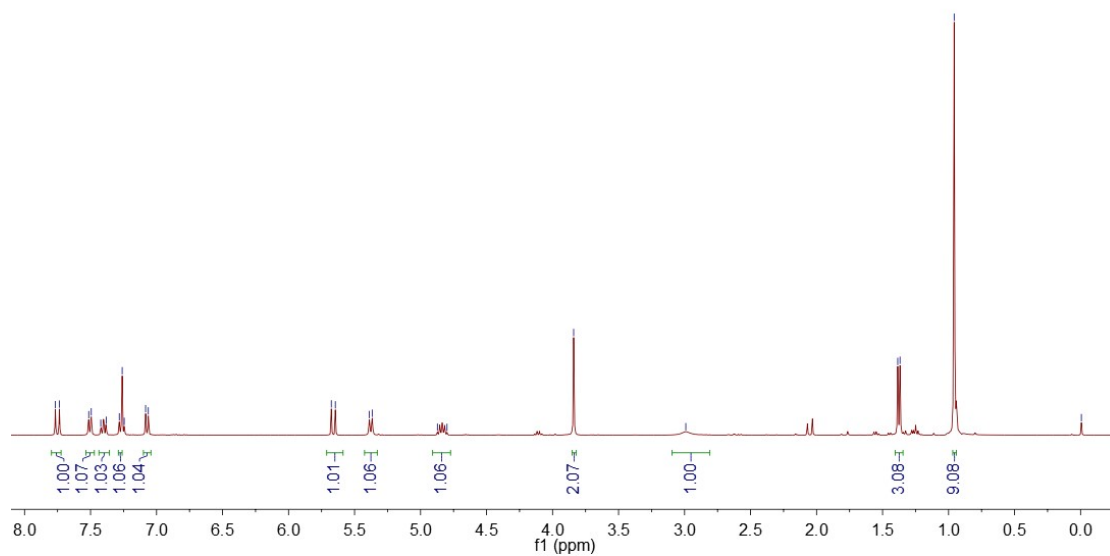

CHQ-2020-12-31-1

167.173  
 158.116  
 153.097  
 130.624  
 129.001  
 128.609  
 125.893  
 117.764  
 103.754  
 88.109  
 77.478  
 77.160  
 76.842  
 73.875  
 70.417  
 31.537  
 26.612  
 16.365

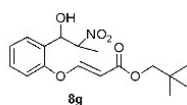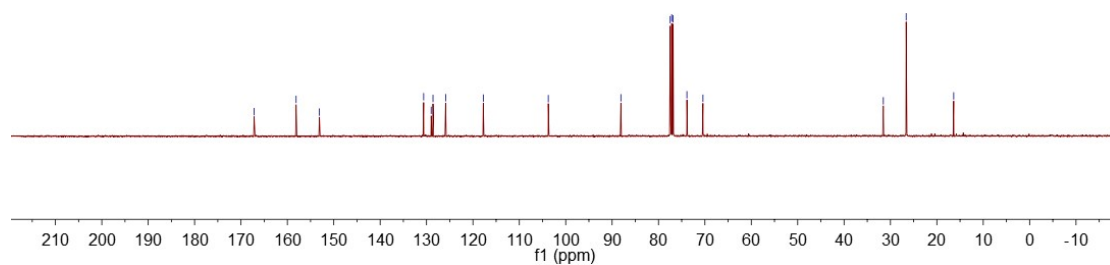

CHQ-2020-9-23-1

7.771  
7.741  
7.503  
7.484  
7.419  
7.401  
7.382  
7.281  
7.260  
7.244  
7.080  
7.059

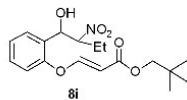

5.675  
5.644  
5.383  
5.362

4.712  
4.702  
4.684  
4.664  
4.655

3.844

2.954

1.989  
1.908

1.515  
1.450

0.959  
0.917  
0.899  
0.881

-0.007

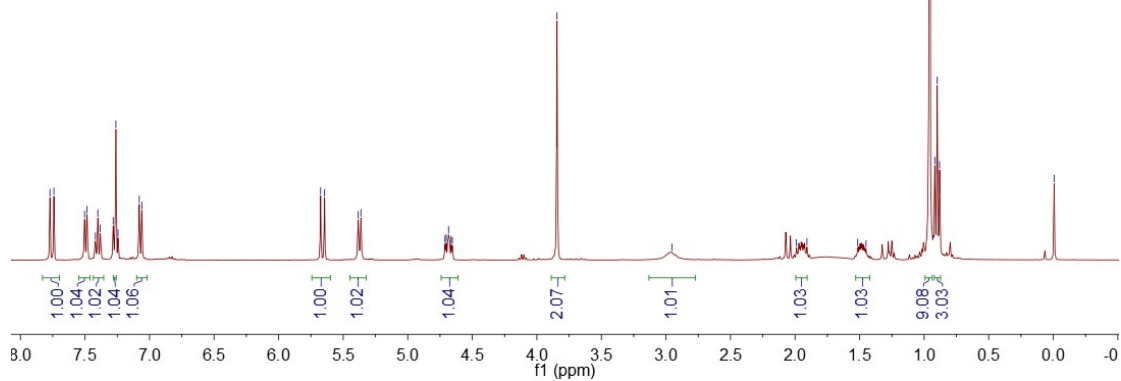

CHQ-2020-9-23-1

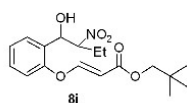

167.181

158.114

153.028

130.605

129.243

128.537

125.918

117.753

103.734

94.812

77.477

77.160

76.842

73.880

69.671

31.543

26.612

23.817

10.323

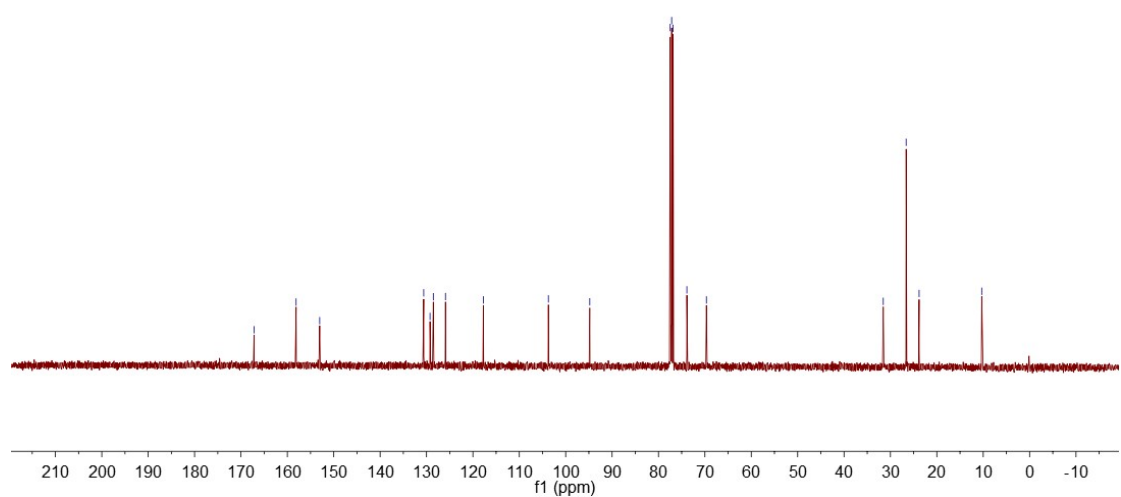



CHQ-2020-9-21-5

7.760  
7.730  
7.396  
7.260  
7.174  
7.153  
6.942  
6.922

5.619  
5.589

4.785  
4.745

3.835

2.914  
2.904

2.364

1.470  
1.453

0.953

0.006

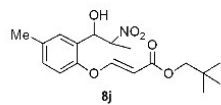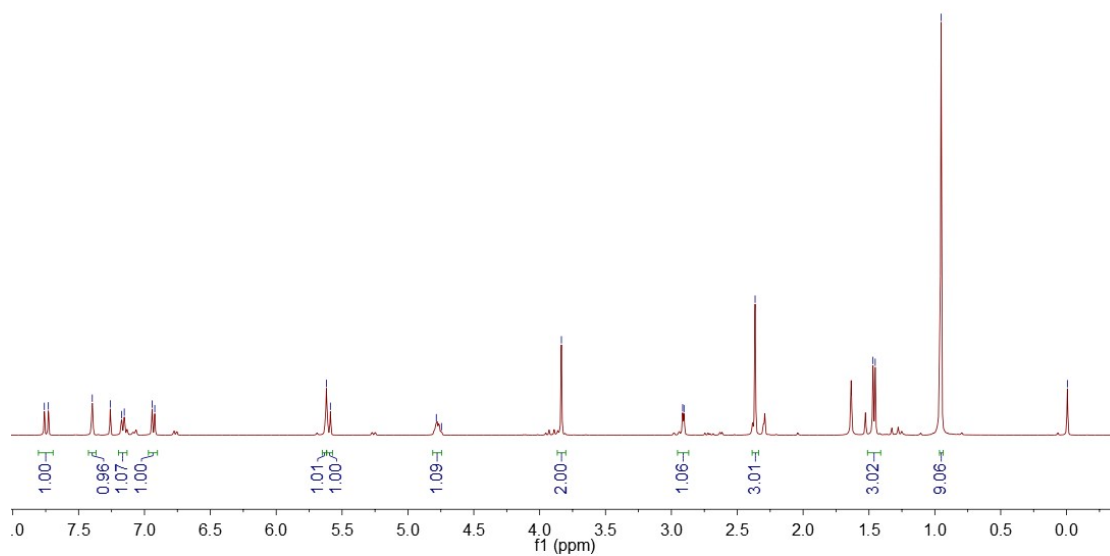

CHQ-2020-9-21-5

167.229

158.376

149.932

135.451

130.512

128.437

128.367

117.354

103.141

85.205

77.477

77.160

76.842

73.789

69.057

31.541

26.624

21.093

11.994

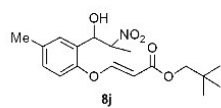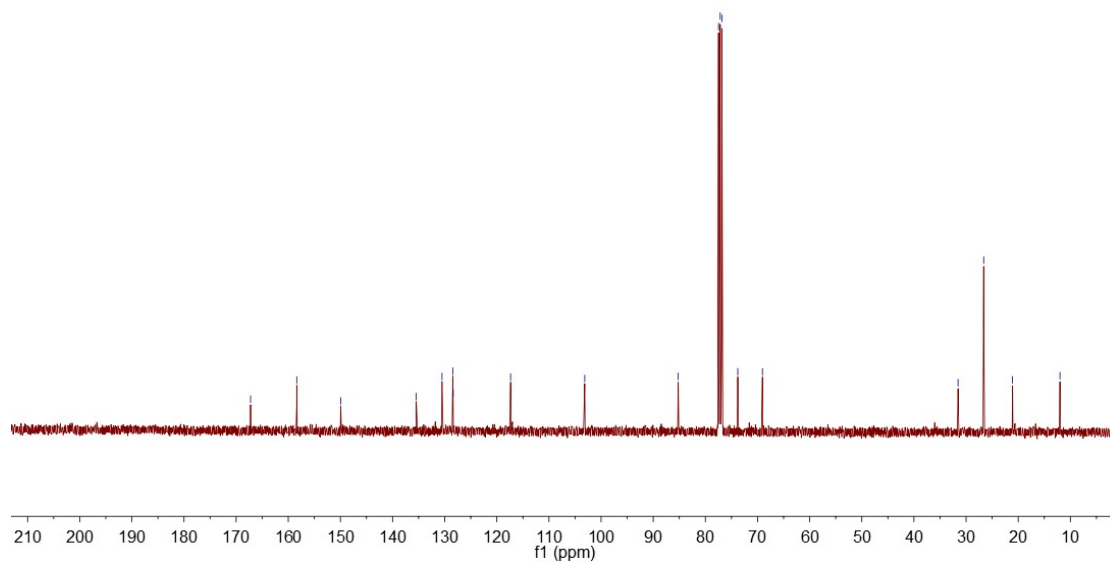

CHQ-2020-12-19-2

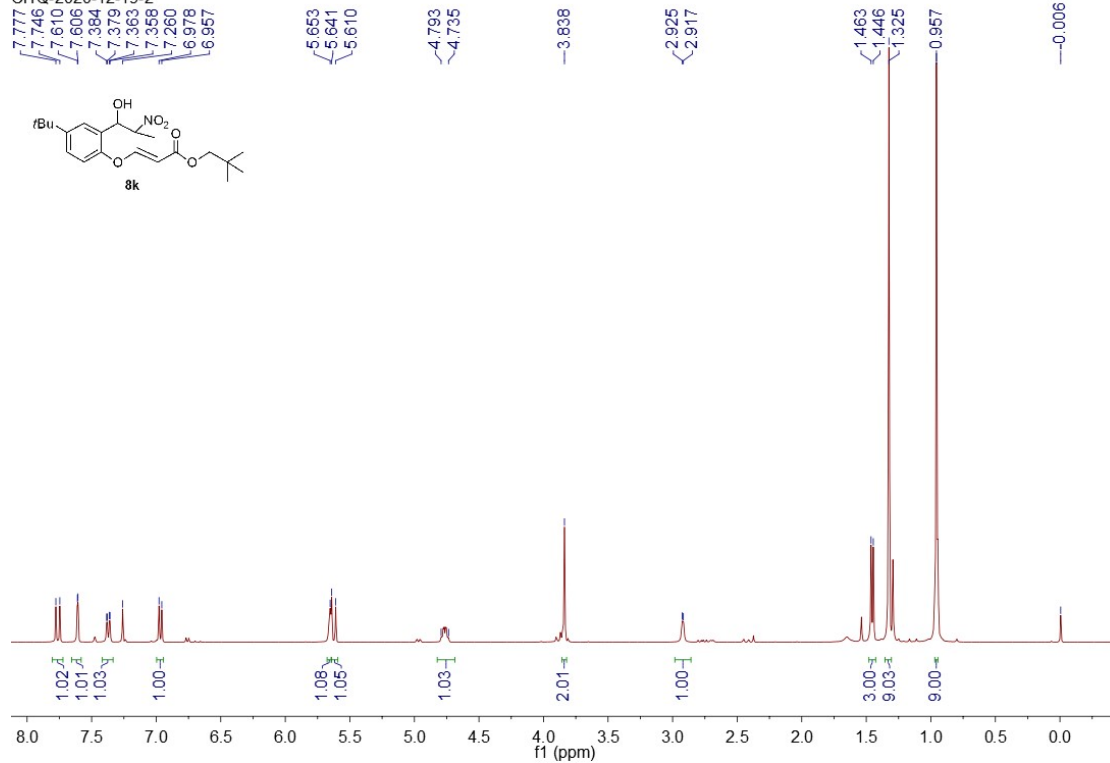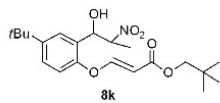

CHQ-2020-12-19-2

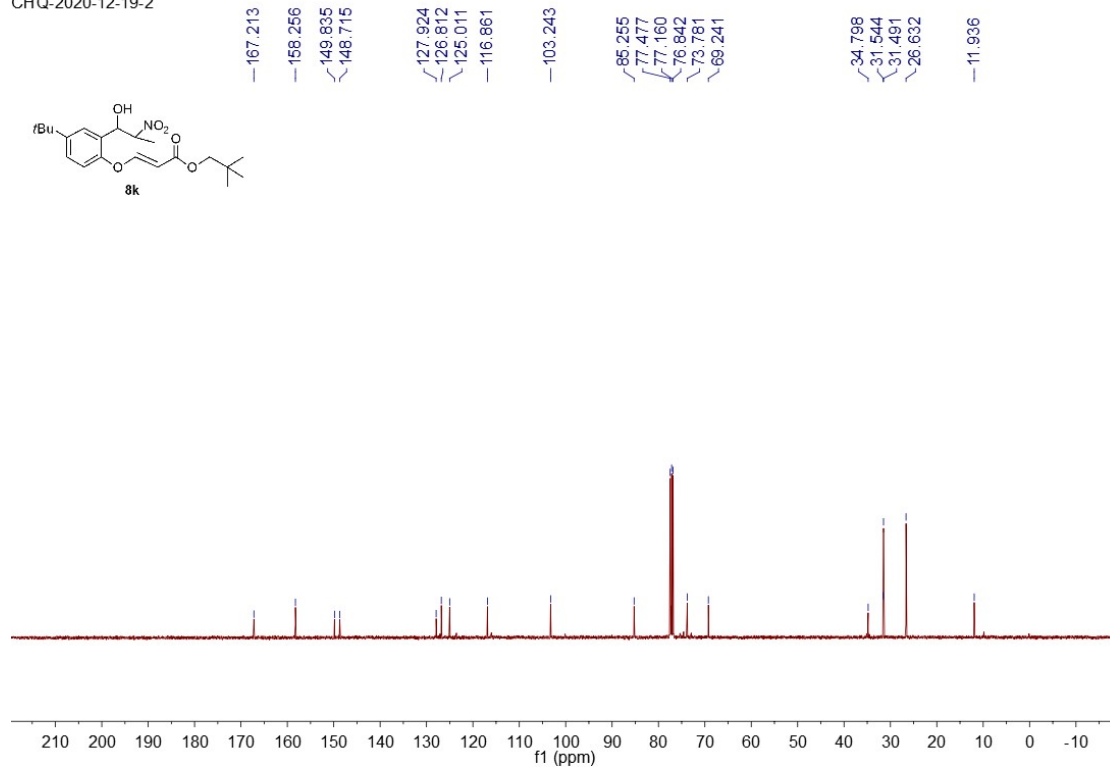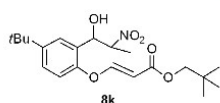

CHQ-2021-1-6-1

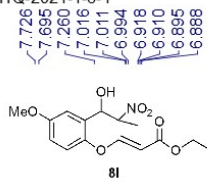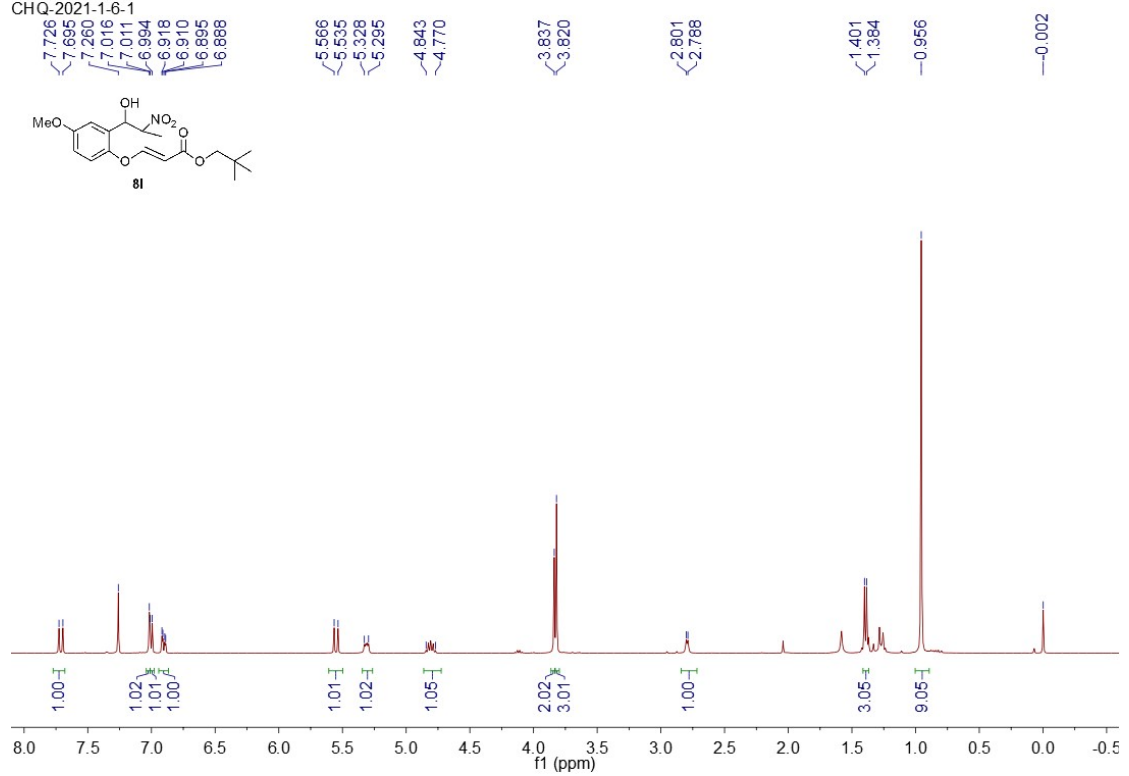

CHQ-2021-1-6-1

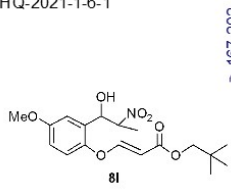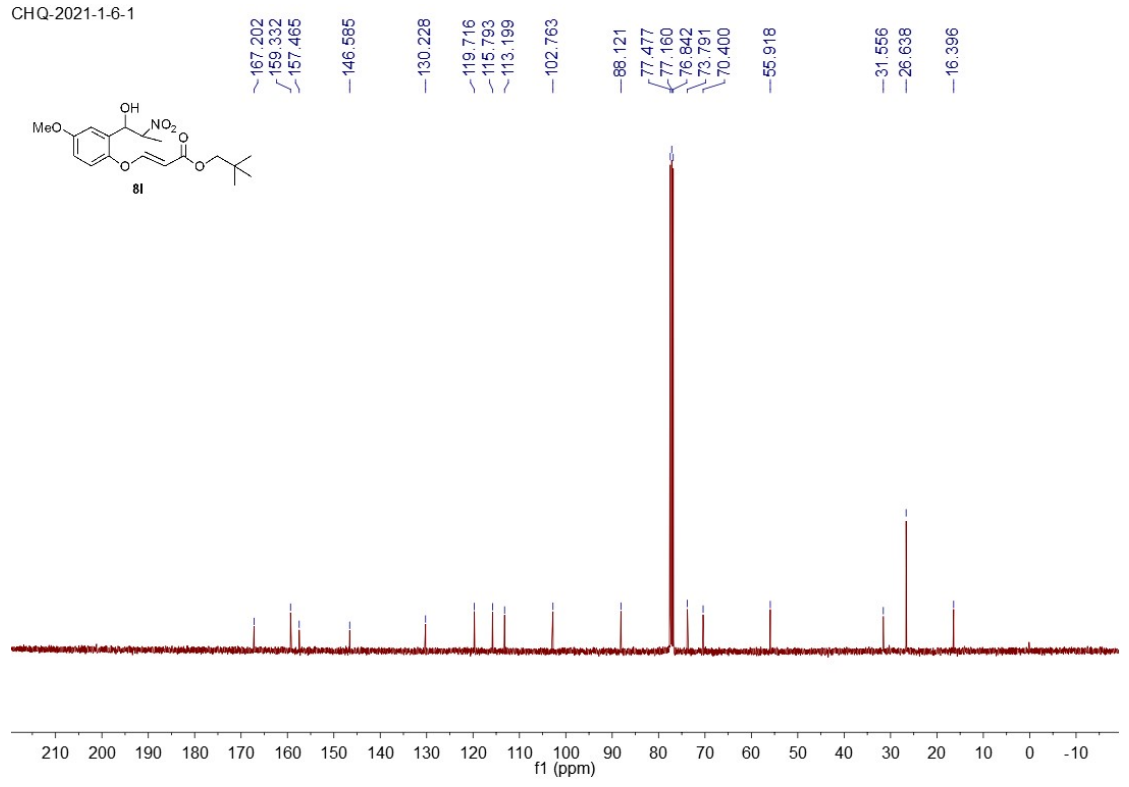

CHQ-2020-9-21-6

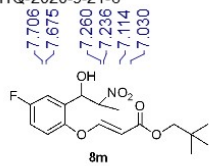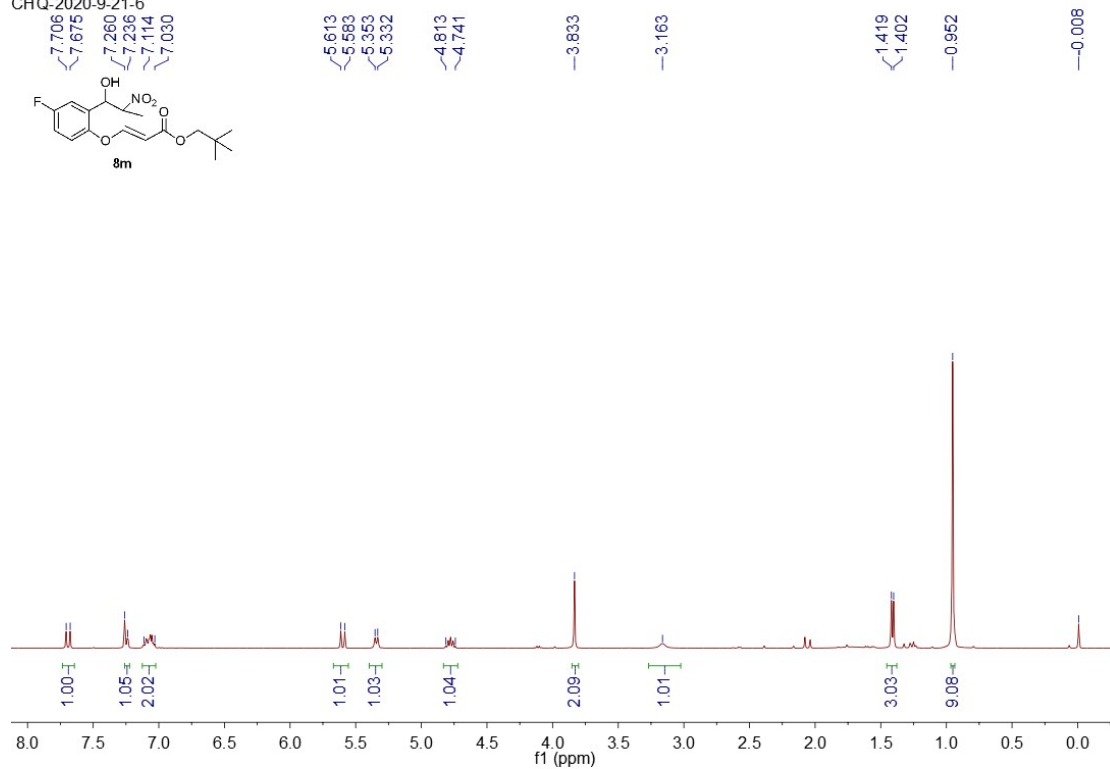

CHQ-2020-9-21-6

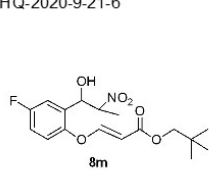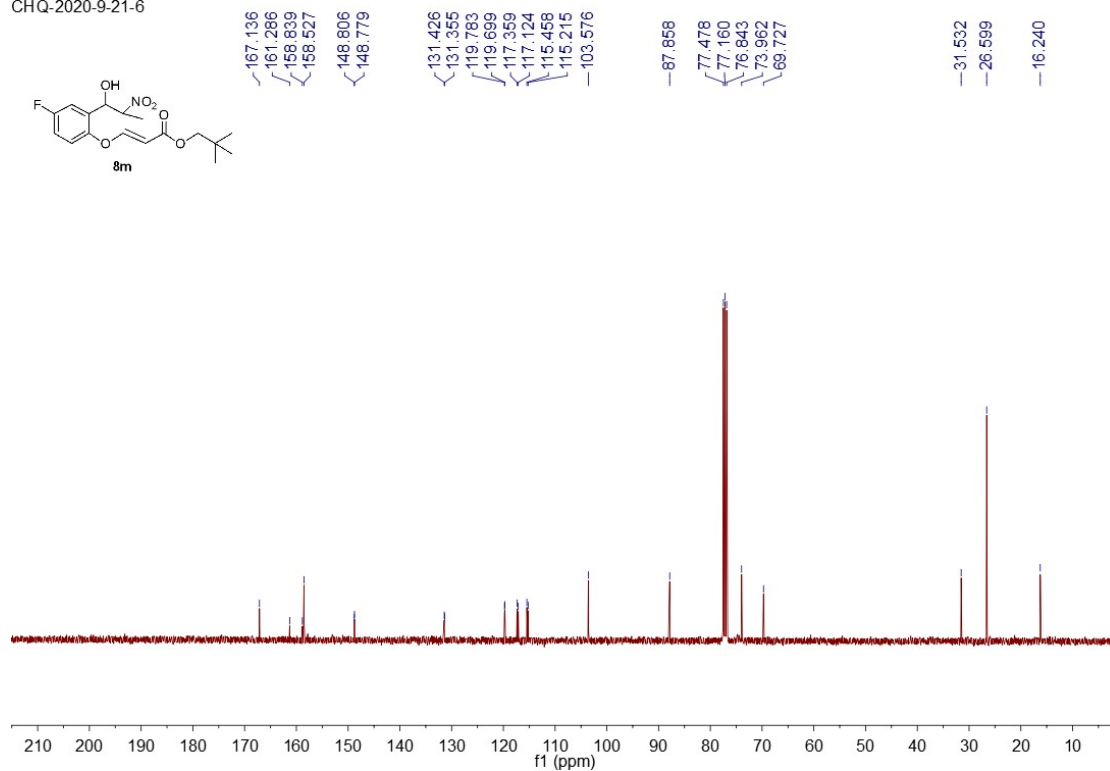

CHQ-2020-1018-7

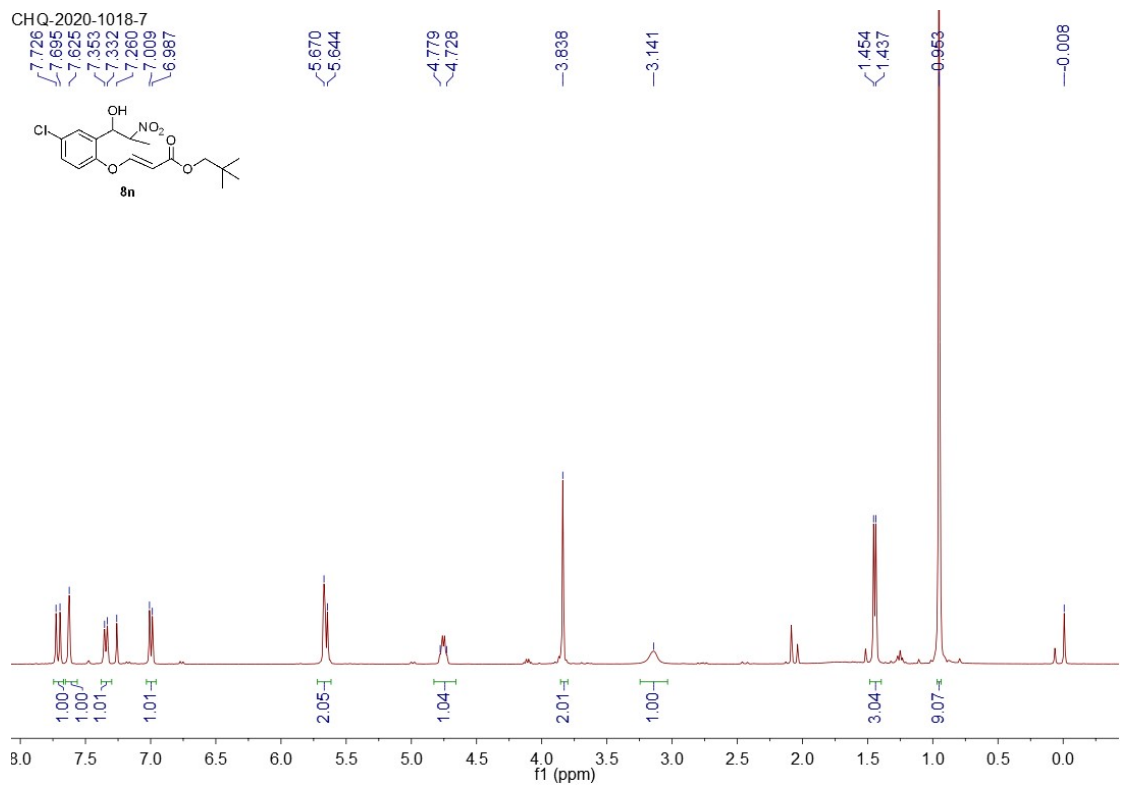

CHQ-2020-10-18-7

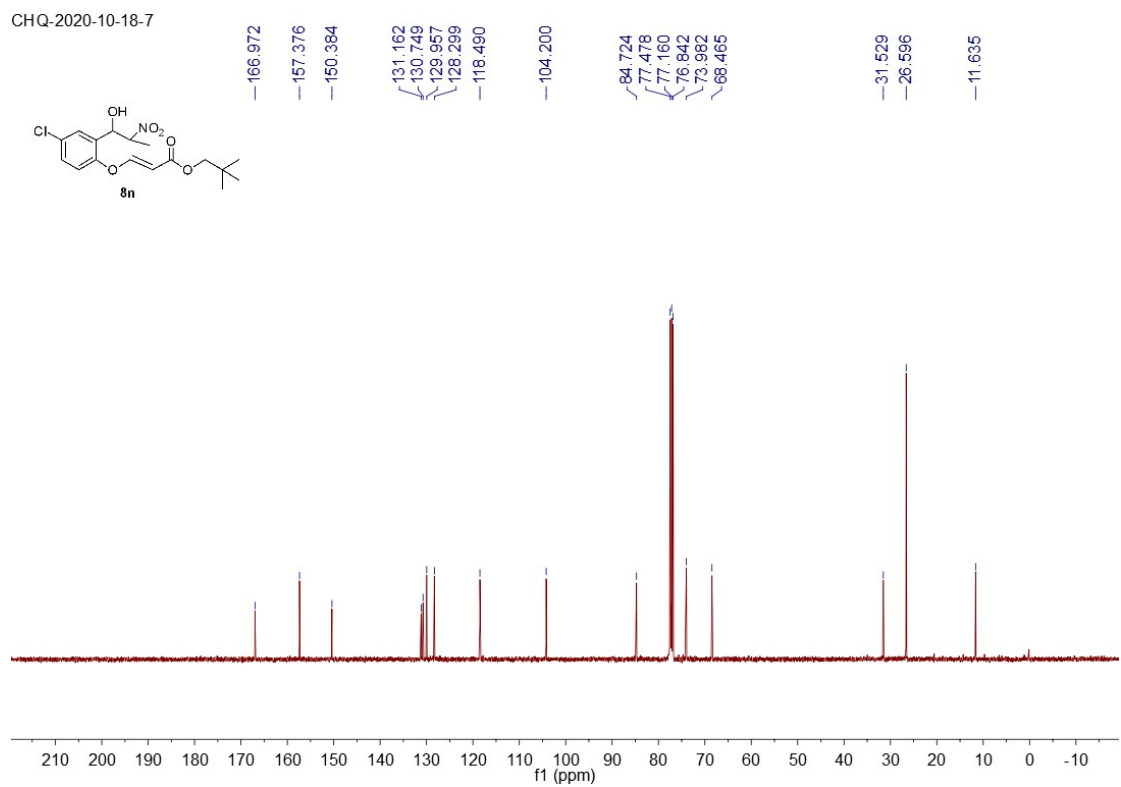

CHQ-2020-1018-8

7.773  
7.769  
7.724  
7.693  
7.489  
7.484  
7.363  
6.931

5.685  
5.670  
5.655

4.782  
4.726

3.841

3.104

1.458  
1.440

0.954

0.007

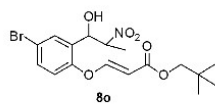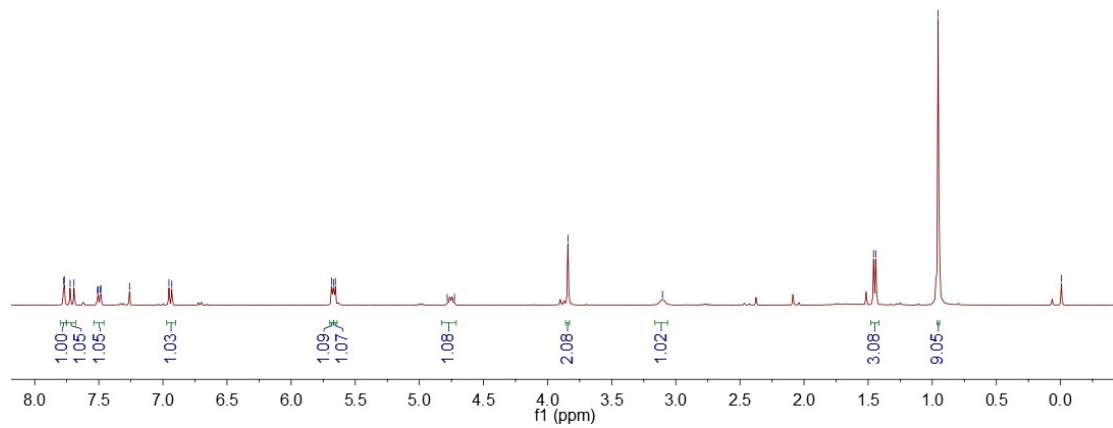

CHQ-2020-10-18-8

166.935

157.195

150.949

132.957

131.212

130.989

118.772

118.635

104.333

84.730

77.477

77.160

76.842

73.987

68.408

31.532

26.600

11.657

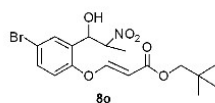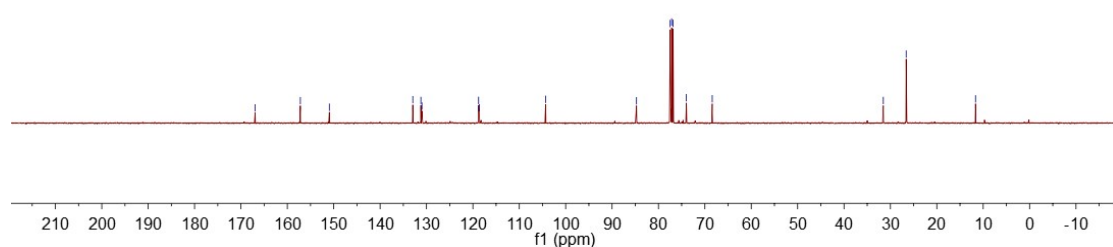

CHQ-2020-12-25-1

7.746  
7.716  
7.430  
7.373  
7.260  
7.023  
7.001  
6.978  
6.916

5.788  
5.757  
5.551  
5.511  
5.155  
5.080

-3.863

2.909  
2.889

1.372  
1.355

-0.967

-0.004

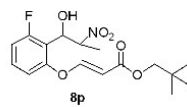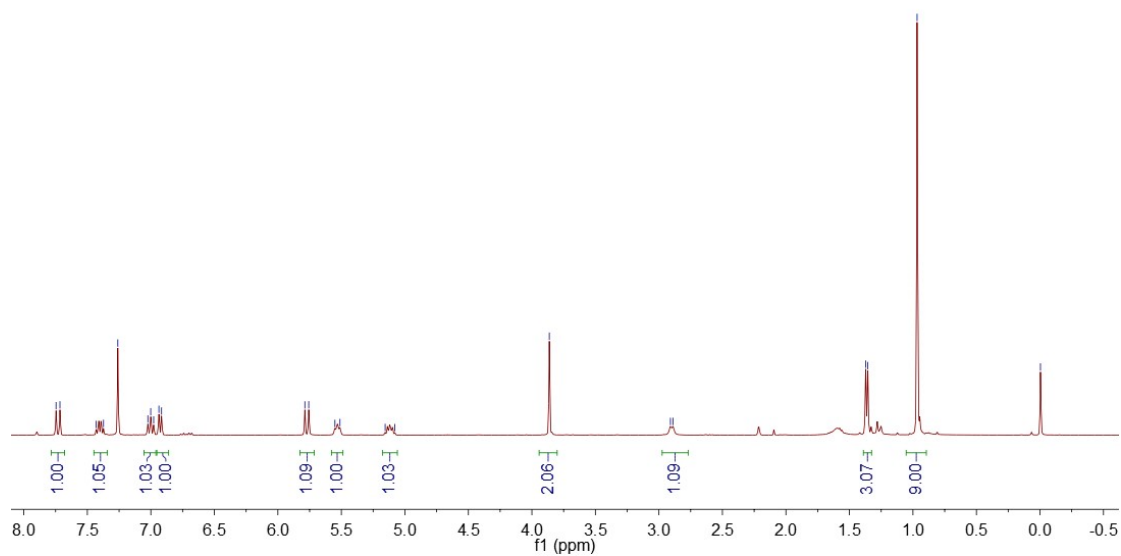

CHQ-2020-12-25-1

166.733  
160.190  
157.078  
154.877  
154.804

131.531  
131.424

116.456  
113.712  
113.678  
113.179  
108.552

86.734  
77.478  
77.160  
76.842  
74.000  
68.375  
68.347

31.560  
26.623

16.460

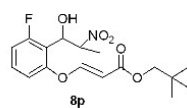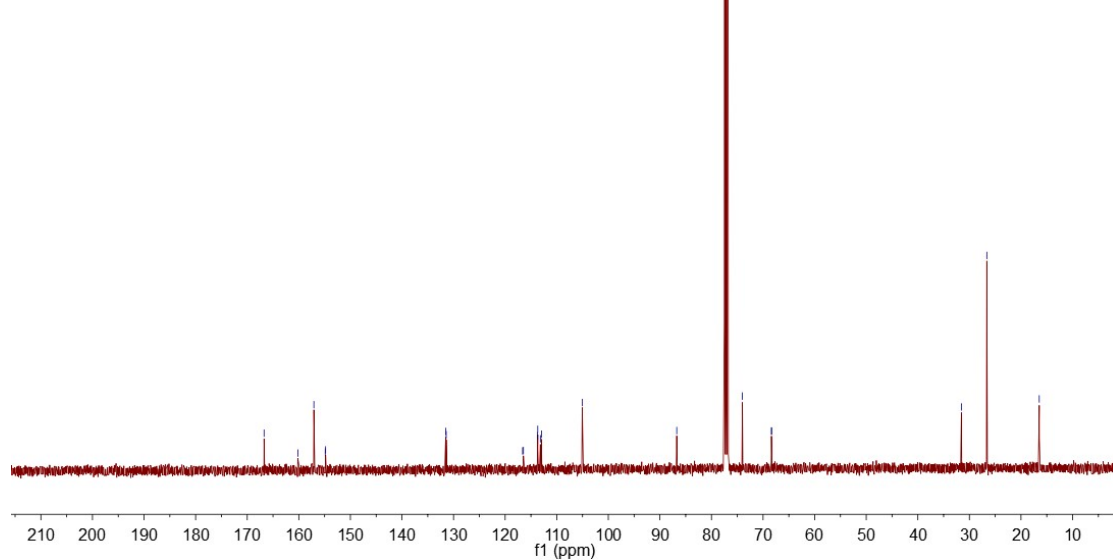

CHQ-2020-12-23-1

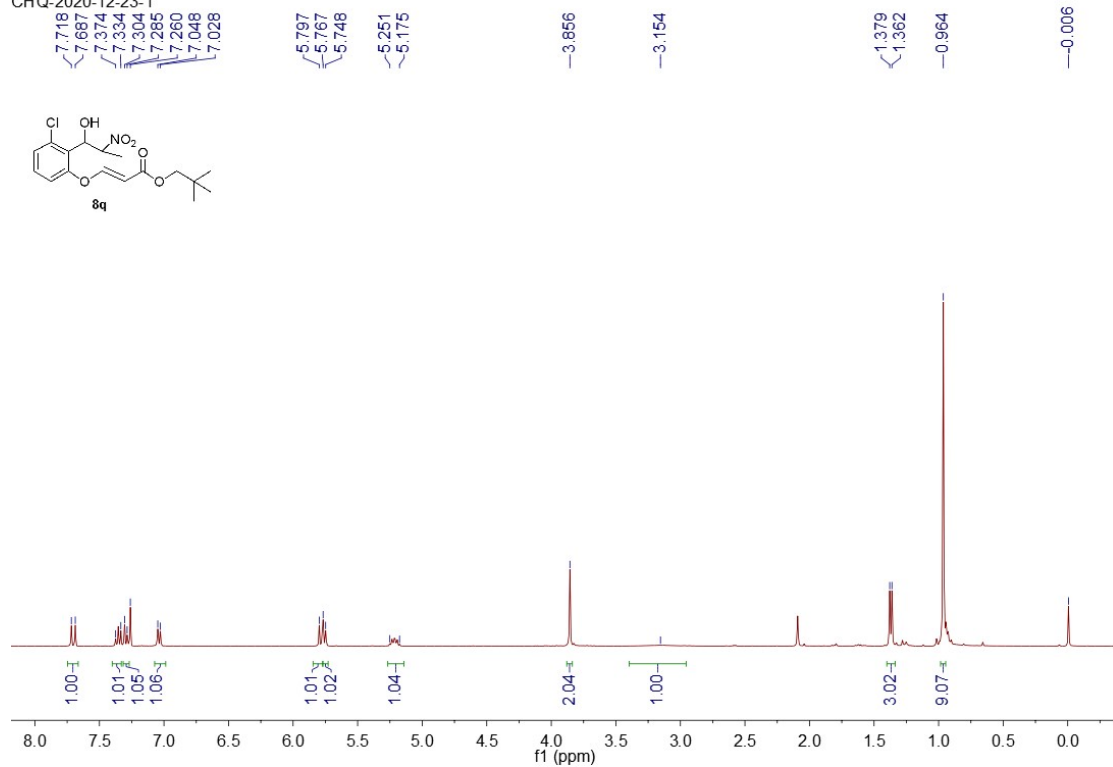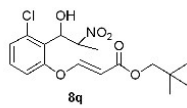

CHQ-2020-12-23-1

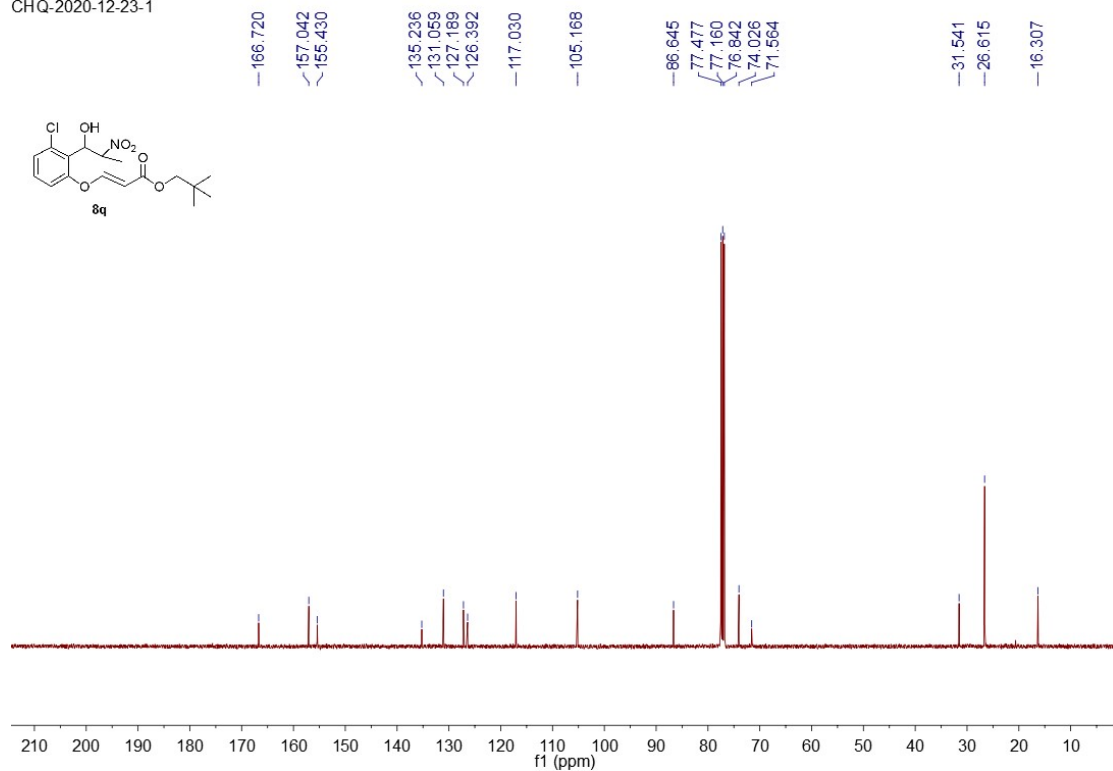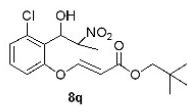



CHQ-2020-12-25-2

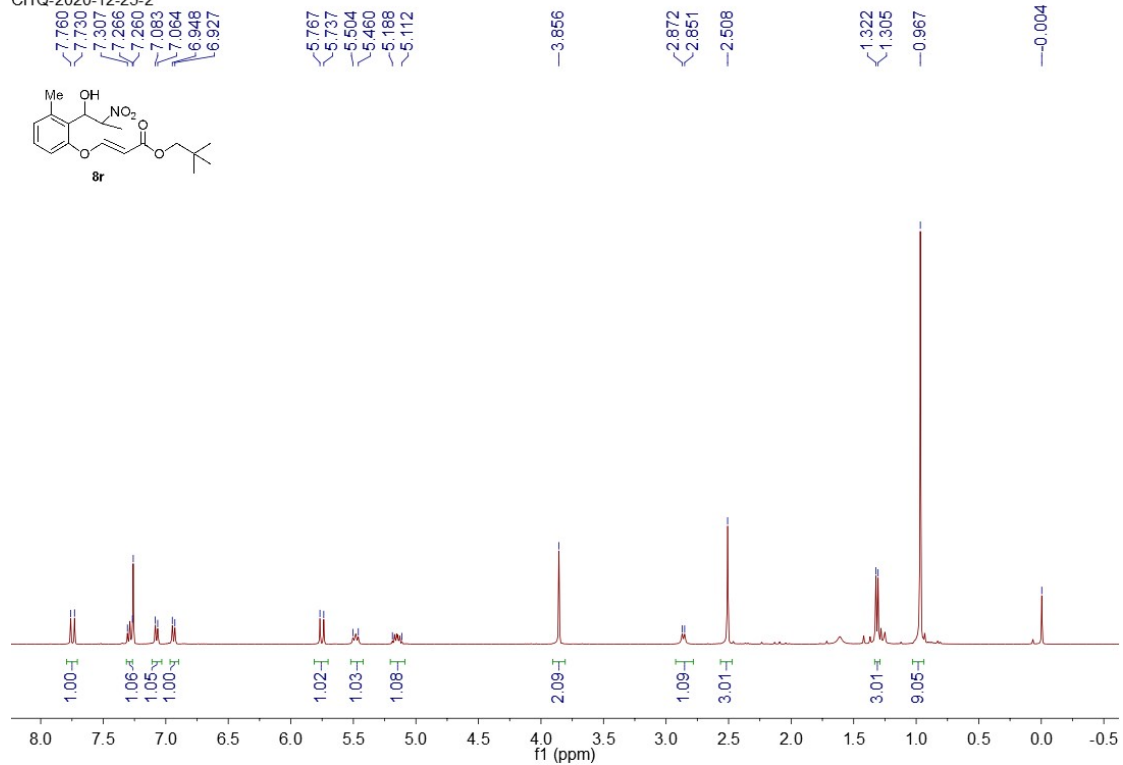

CHQ-2020-12-25-2

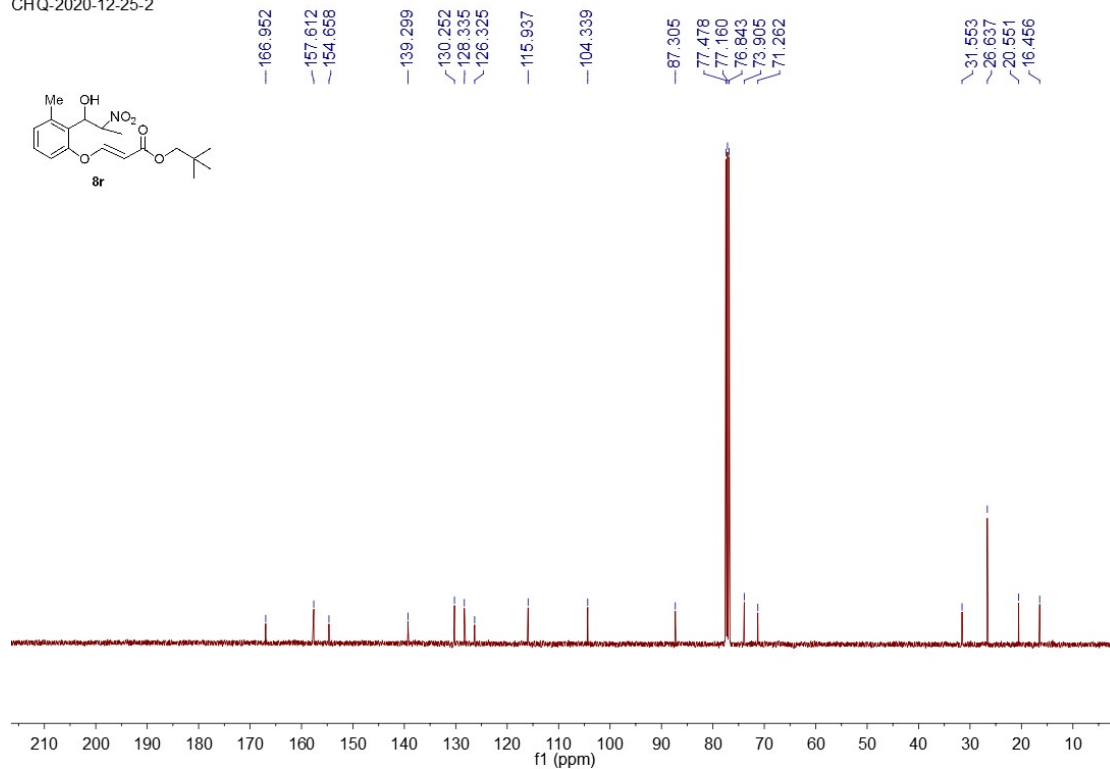

CHQ-2020-12-18-3

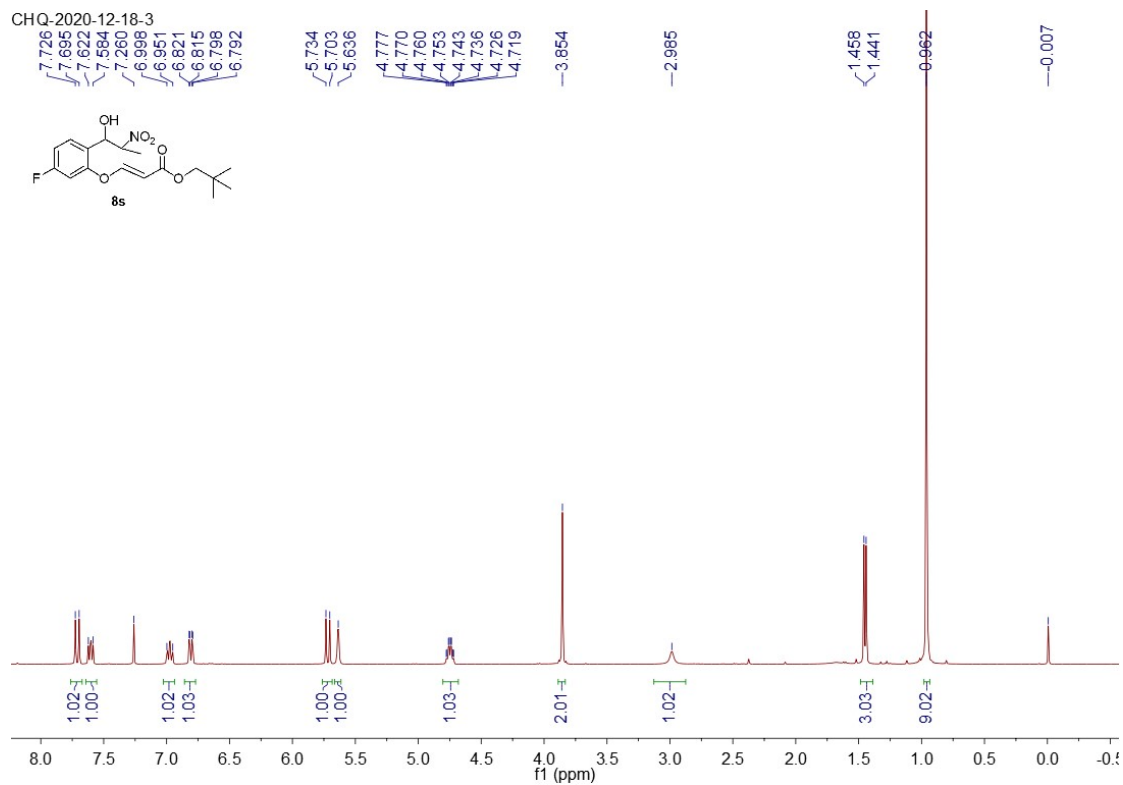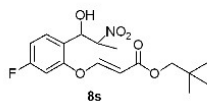

CHQ-2020-12-18-3

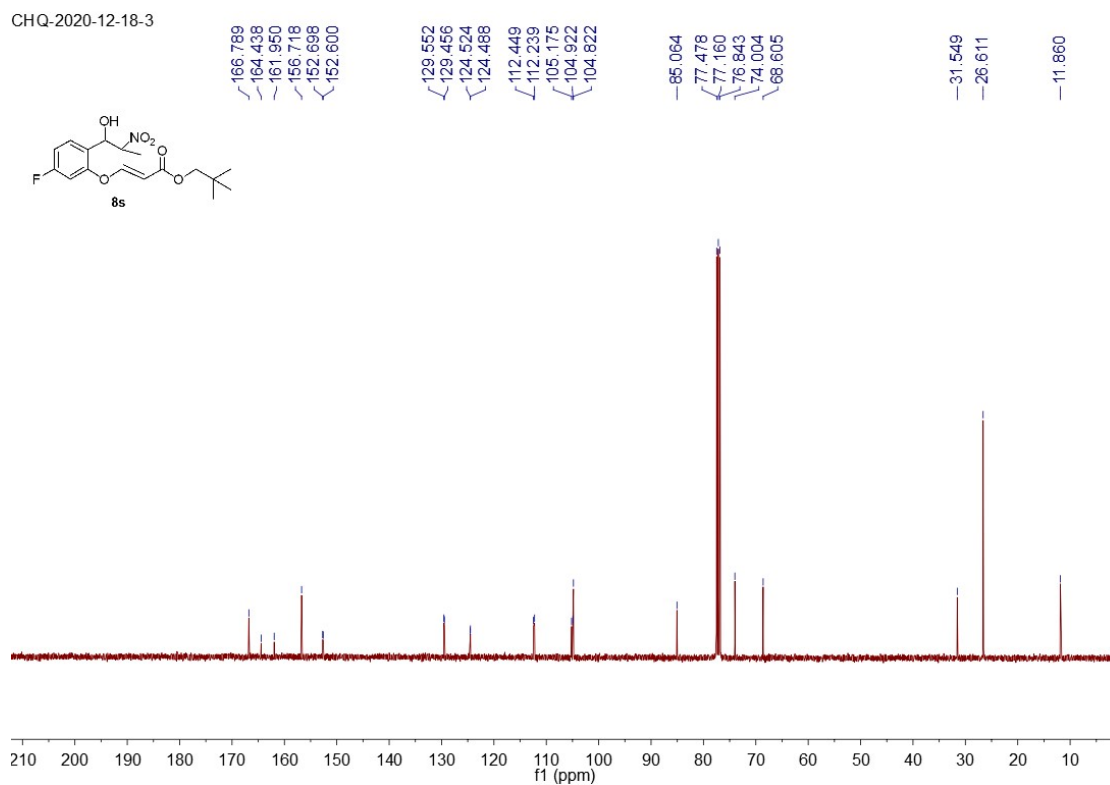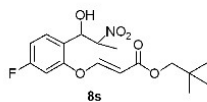

CHQ-2020-12-18-4

7.728  
7.699  
7.581  
7.560  
7.260  
7.236  
7.071  
7.067

5.726  
5.696  
5.649  
5.645  
4.774  
4.768  
4.757  
4.751  
4.740  
4.734  
4.723  
4.717

-3.858

-2.986

1.450  
1.432

-0.965

-0.006

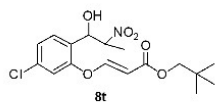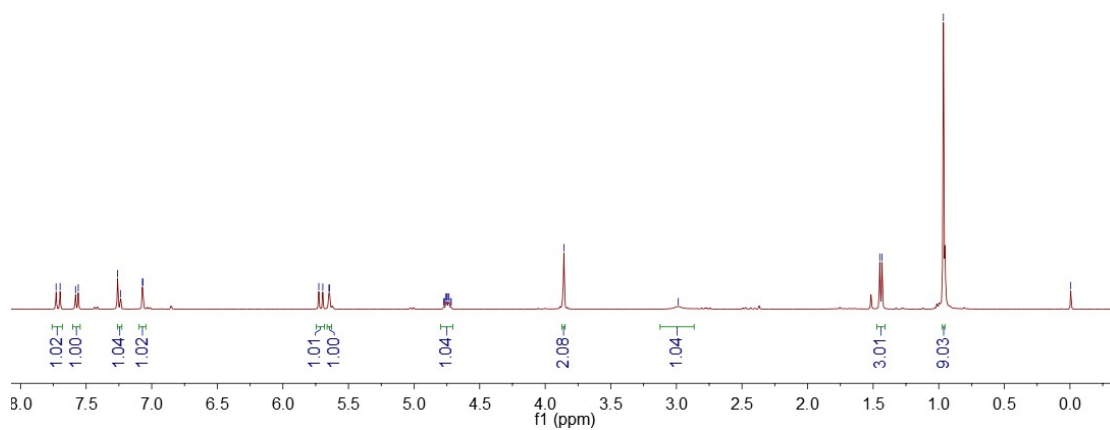

CHQ-2020-12-18-4

-166.835

-156.829

-152.302

135.501

129.226

127.301

125.708

-117.544

-104.806

84.875

77.478

77.160

76.843

74.026

68.558

-31.552

-26.614

-11.788

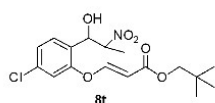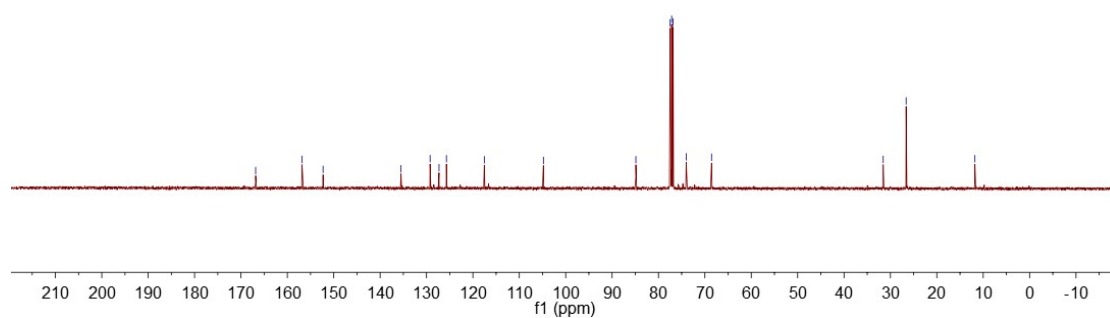

CHQ-2020-12-24-4

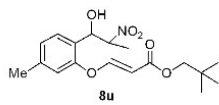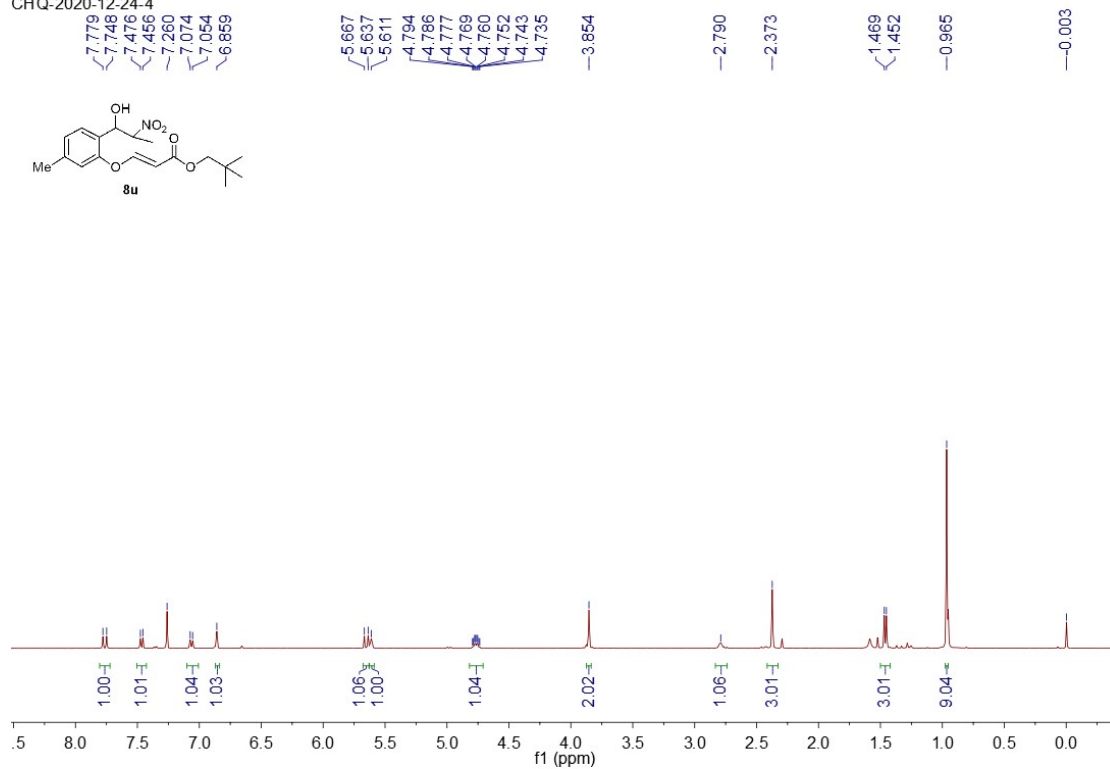

CHQ-2020-12-24-4

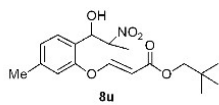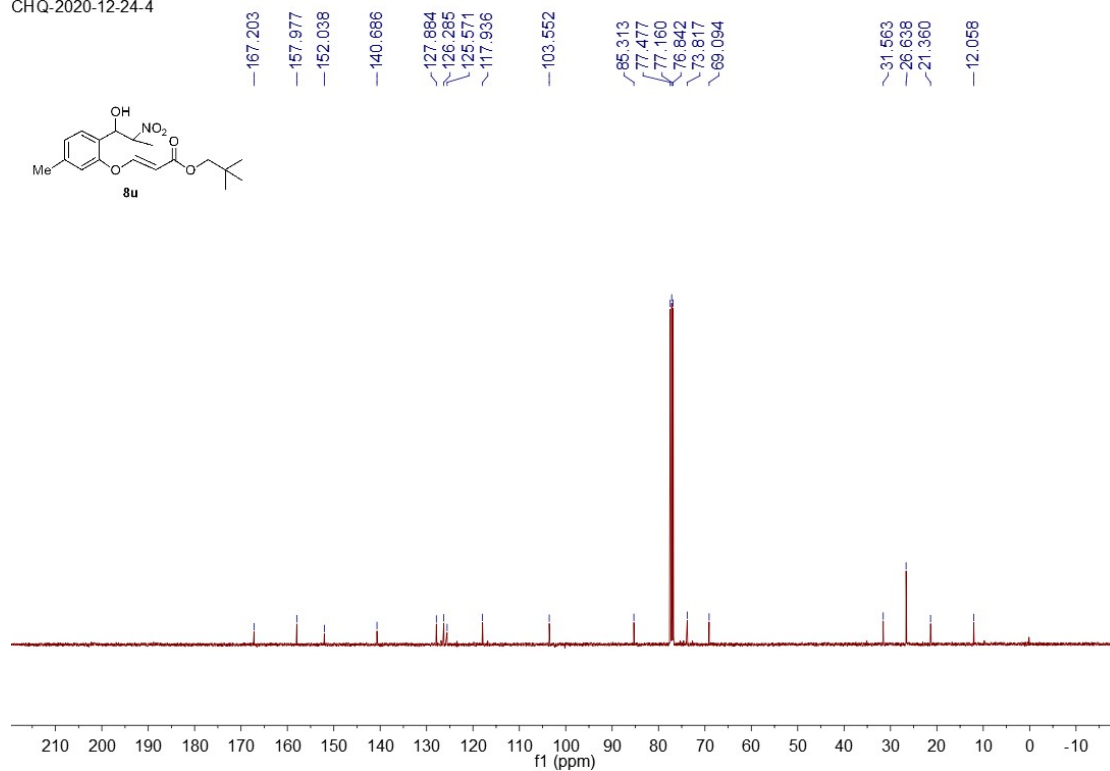

CHQ-2020-12-18-4

7.732  
7.728  
7.701  
7.697  
7.432  
7.412  
7.306  
7.273  
7.260  
7.208  
7.164

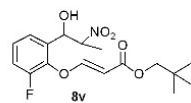

5.608  
5.605  
5.386  
5.356  
4.772  
4.765  
4.755  
4.748  
4.738  
4.731  
4.721  
4.714

3.808  
3.148

1.451  
1.434

0.998

0.010

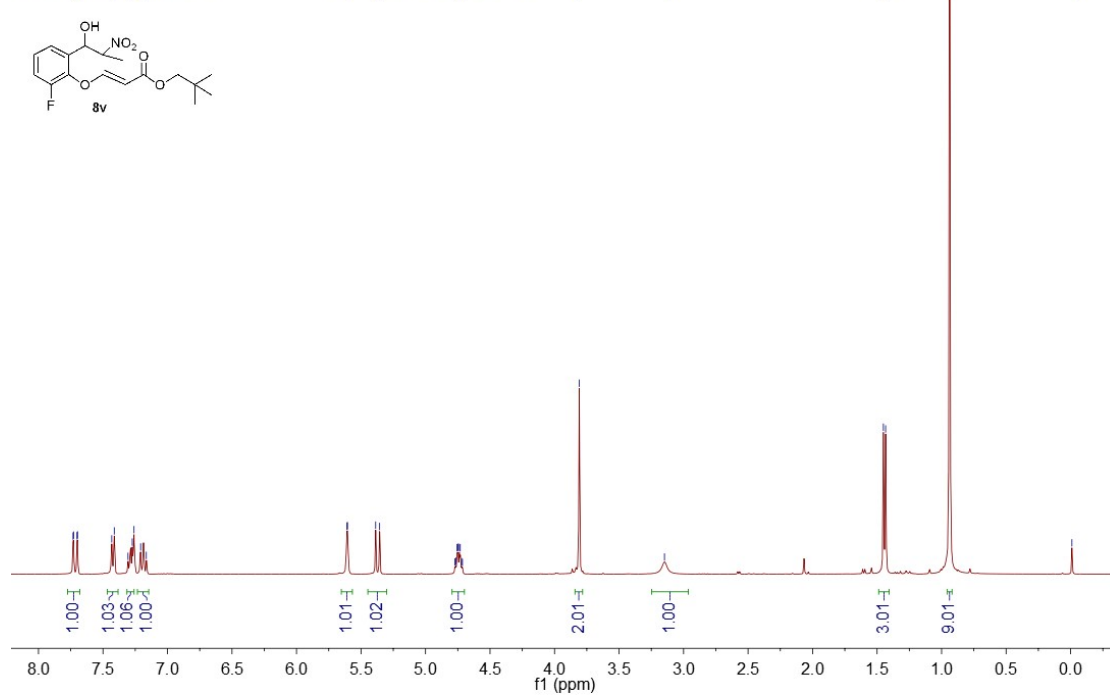

CHQ-2020-12-18-4

166.883  
159.600  
159.574  
155.014  
152.515  
138.740  
138.615  
133.018  
127.123  
127.049  
123.194  
123.159  
117.464  
117.283  
101.765

85.016  
77.478  
77.160  
76.843  
73.920  
68.739  
68.710

31.507  
26.599  
11.735

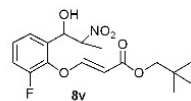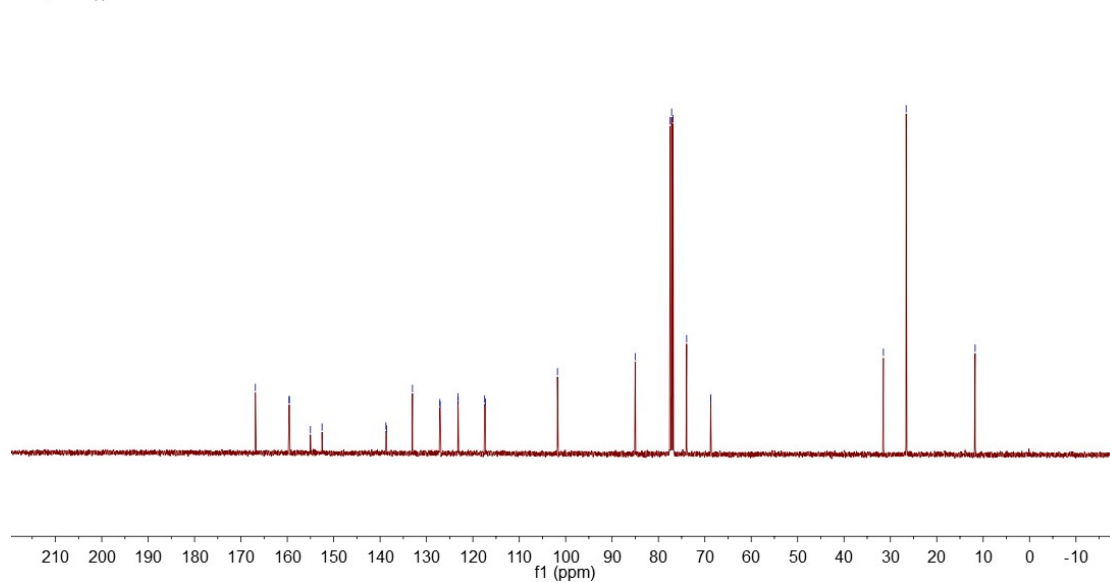

CHQ-2020-12-18-4

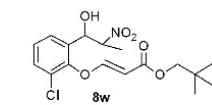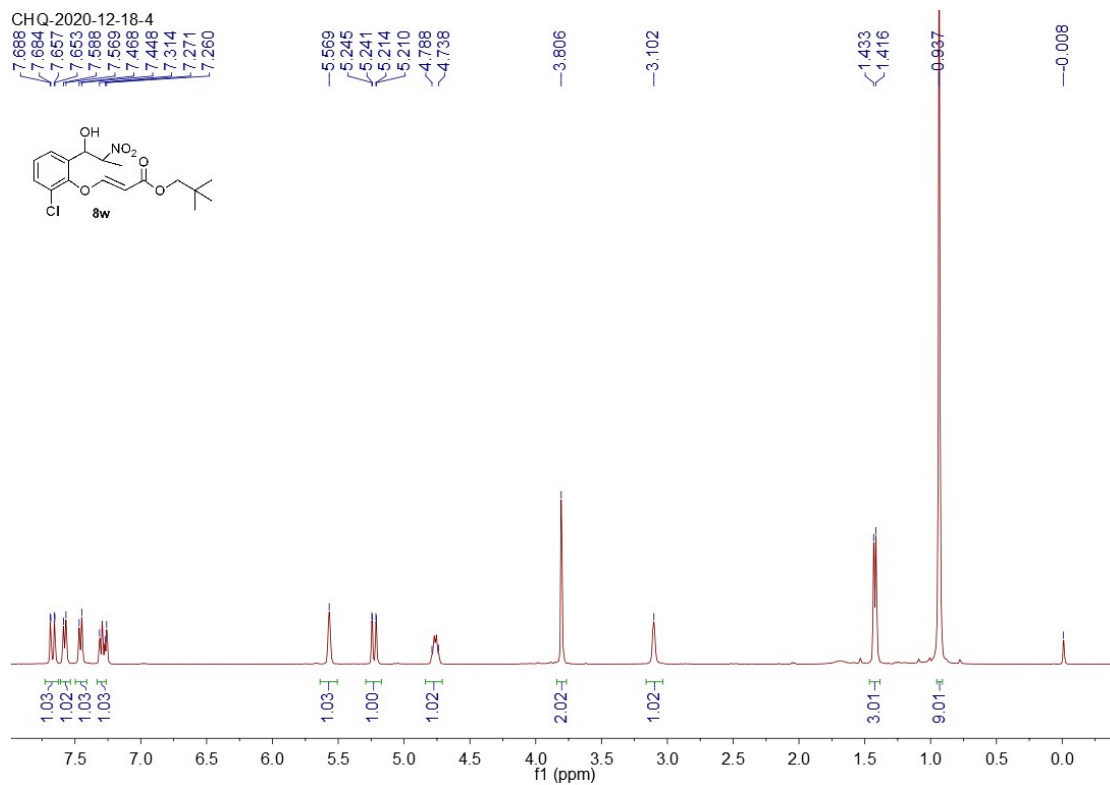

CHQ-2020-12-18-4

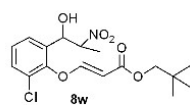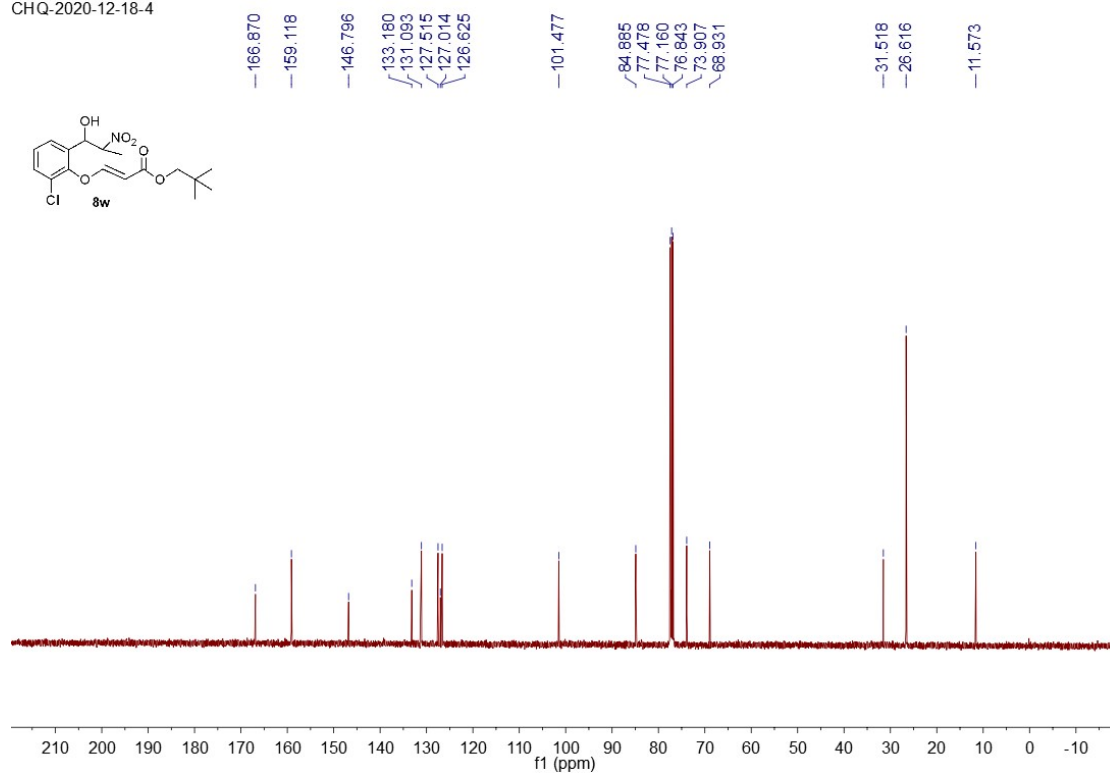

CHQ-2020-12-24-5

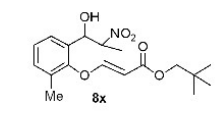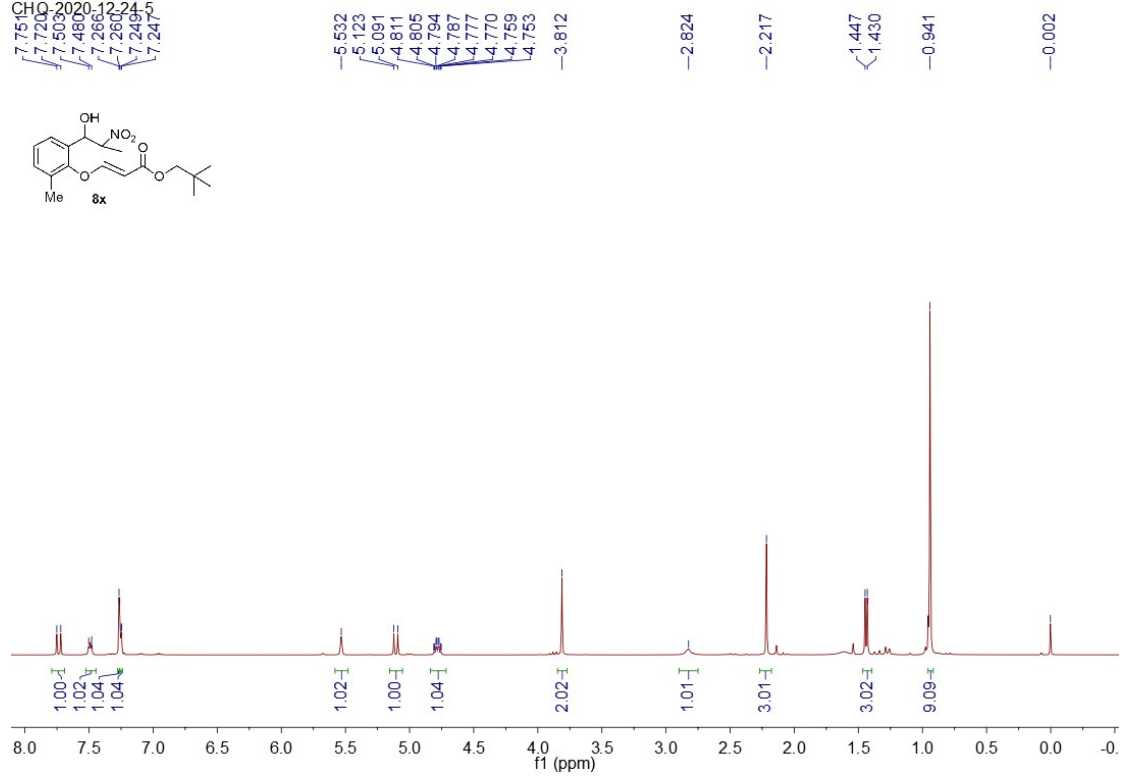

CHQ-2020-12-24-5

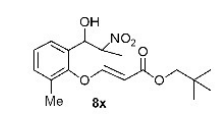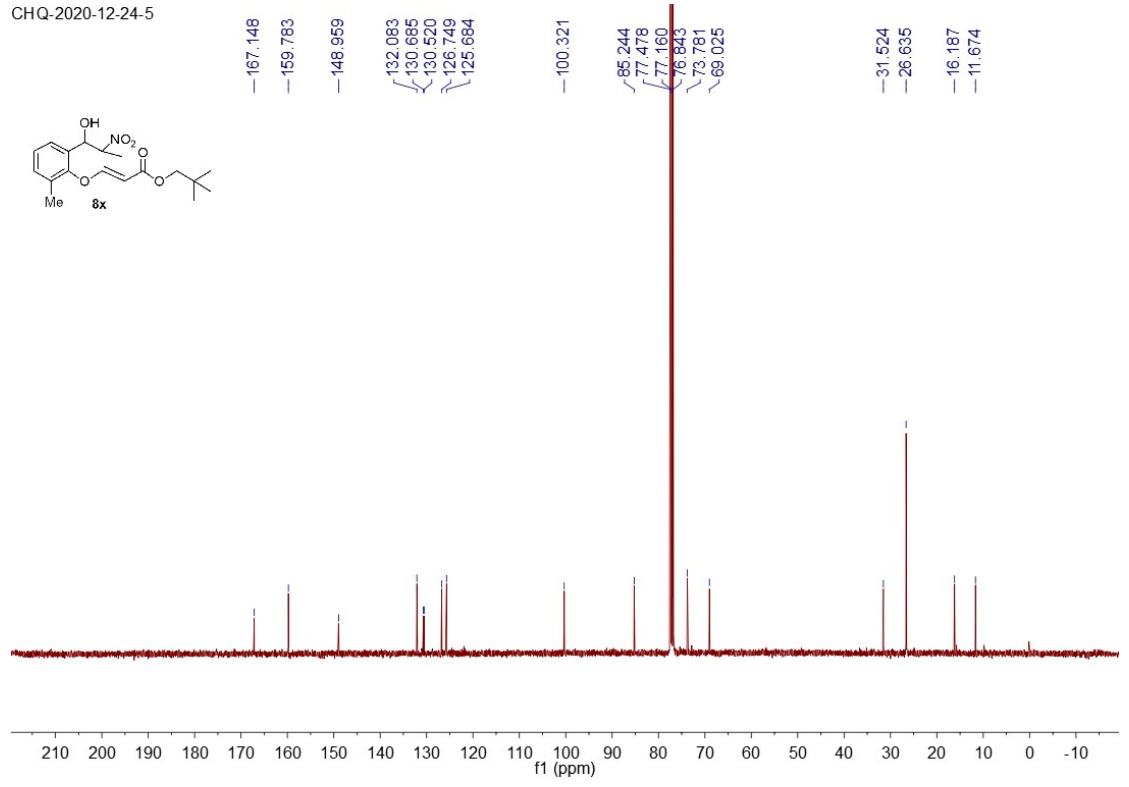

CHQ-2020-7-28-2

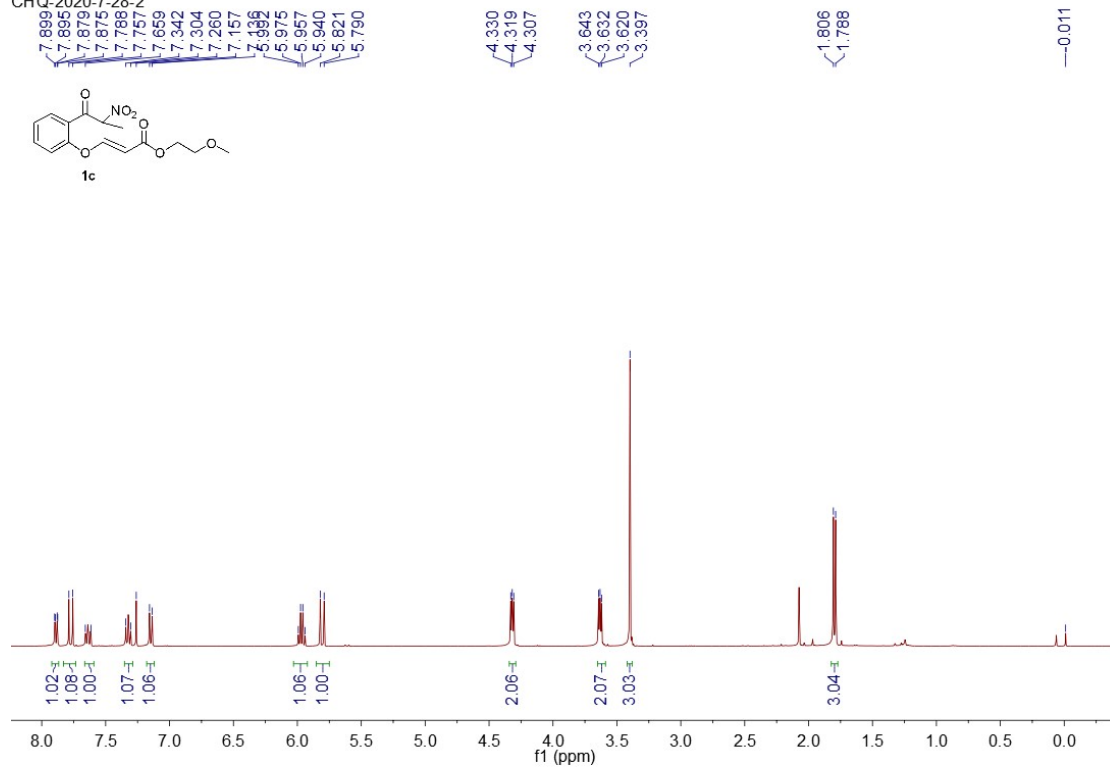

CHQ-2020-7-28-2

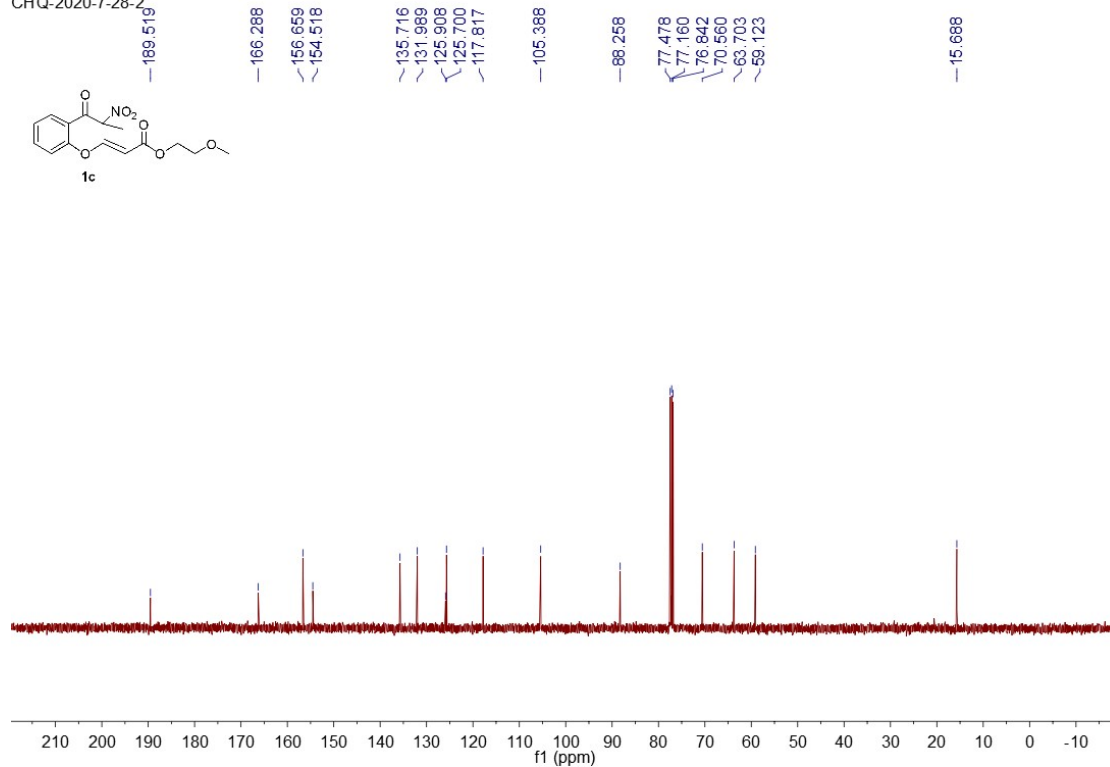



CHQ-2020-7-25-1

7.905  
7.901  
7.885  
7.882  
7.780  
7.720  
7.338  
7.319  
7.300  
7.260  
7.152  
6.008  
5.990  
5.973  
5.955  
5.791  
5.760

4.170  
4.153  
4.137

1.813  
1.795  
1.680  
1.627  
1.341  
1.272

0.890  
0.875  
0.858

-0.008

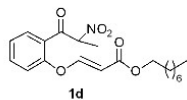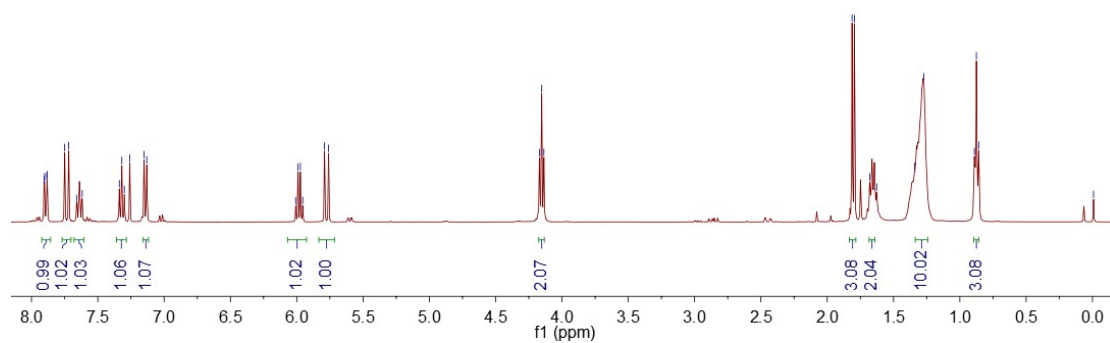

CHQ-2020-7-25-1

189.534  
166.383  
156.077  
154.649

135.726  
132.021  
125.831  
125.593  
117.627

105.918

88.308

77.478  
77.160  
76.842

64.964

31.907  
29.345  
29.298  
28.774  
26.061  
22.761  
15.702  
14.208

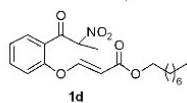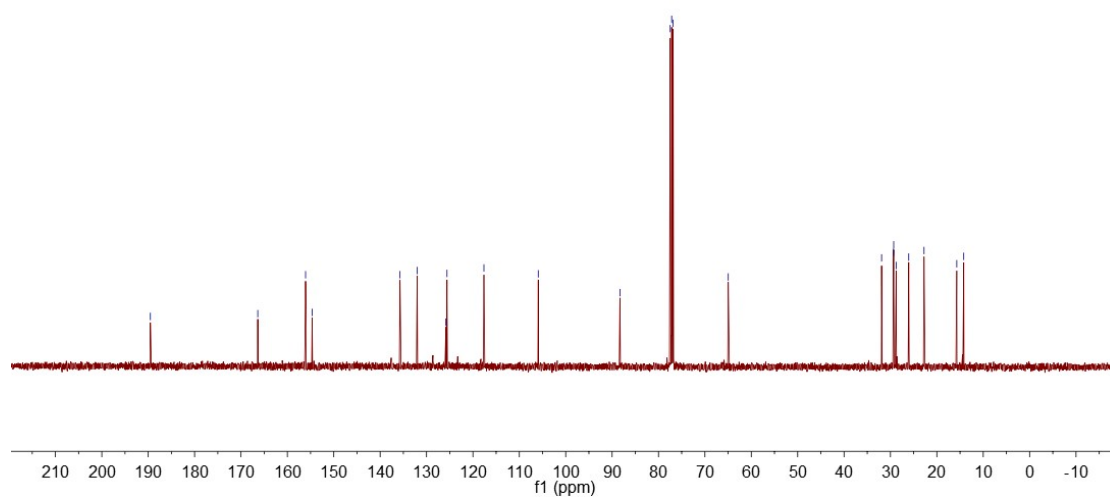

CHQ-2020-7-17-3

7.910  
7.906  
7.890  
7.886  
7.738  
7.708  
7.665  
7.621  
7.338  
7.300  
7.260  
7.159  
7.139  
6.011  
5.994  
5.976  
5.958  
5.768  
5.738  
5.147  
5.131  
5.116  
5.100  
5.084  
5.069  
5.053

1.815  
1.798

1.291  
1.275

-0.007

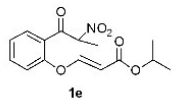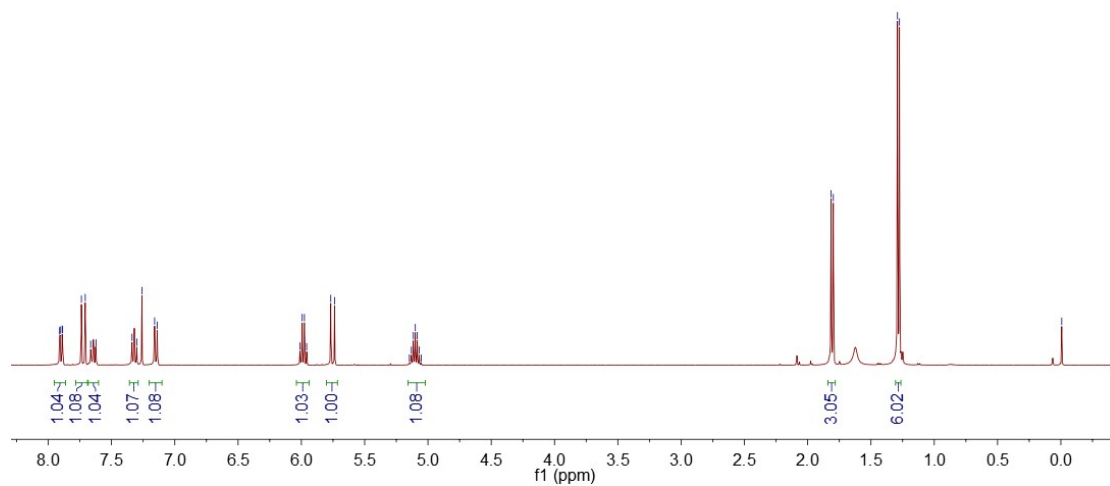

CHQ-2020-7-17-3

189.578  
165.841  
155.912  
154.680  
135.757  
132.036  
125.792  
117.644  
106.391  
88.339  
77.478  
77.160  
76.842  
68.206  
22.026  
15.714

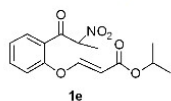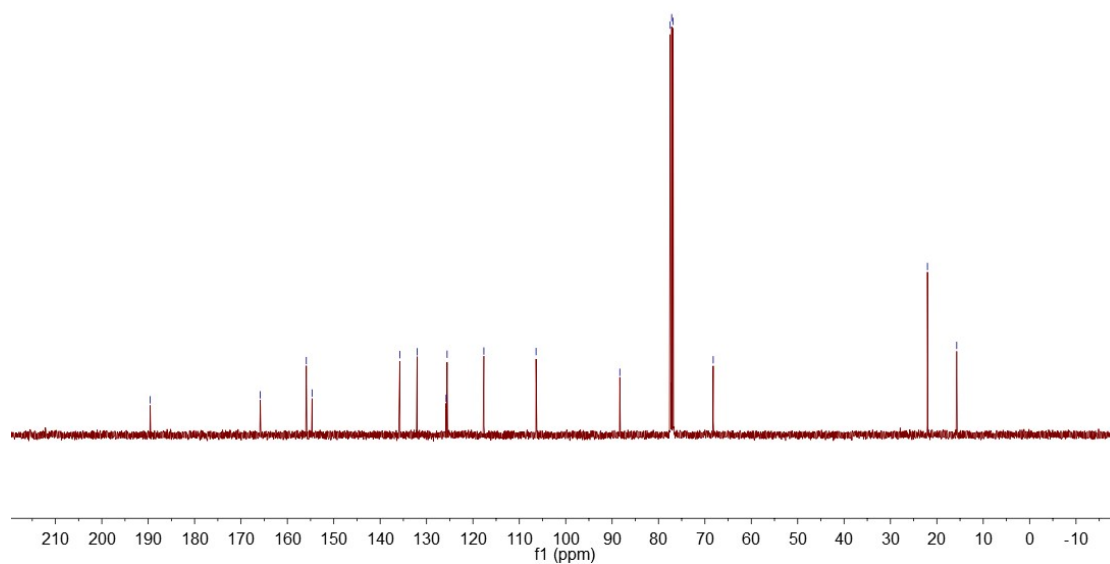

CHQ-2020-7-17-2

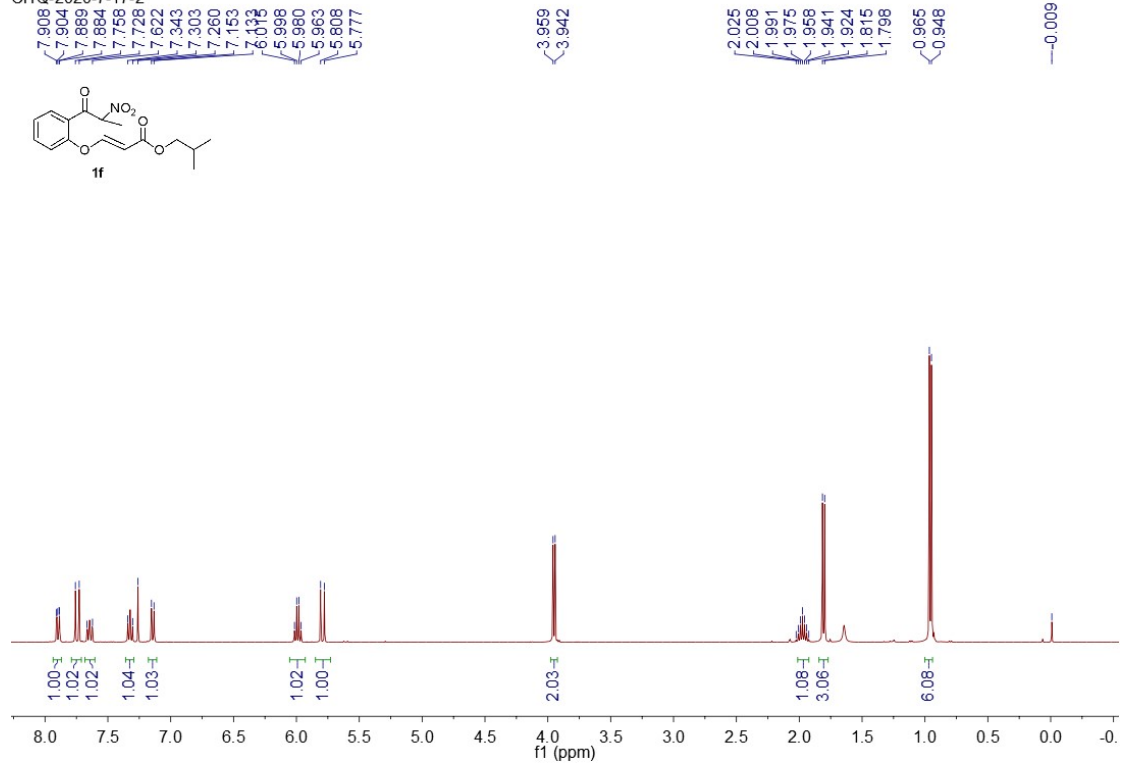

CHQ-2020-7-17-2

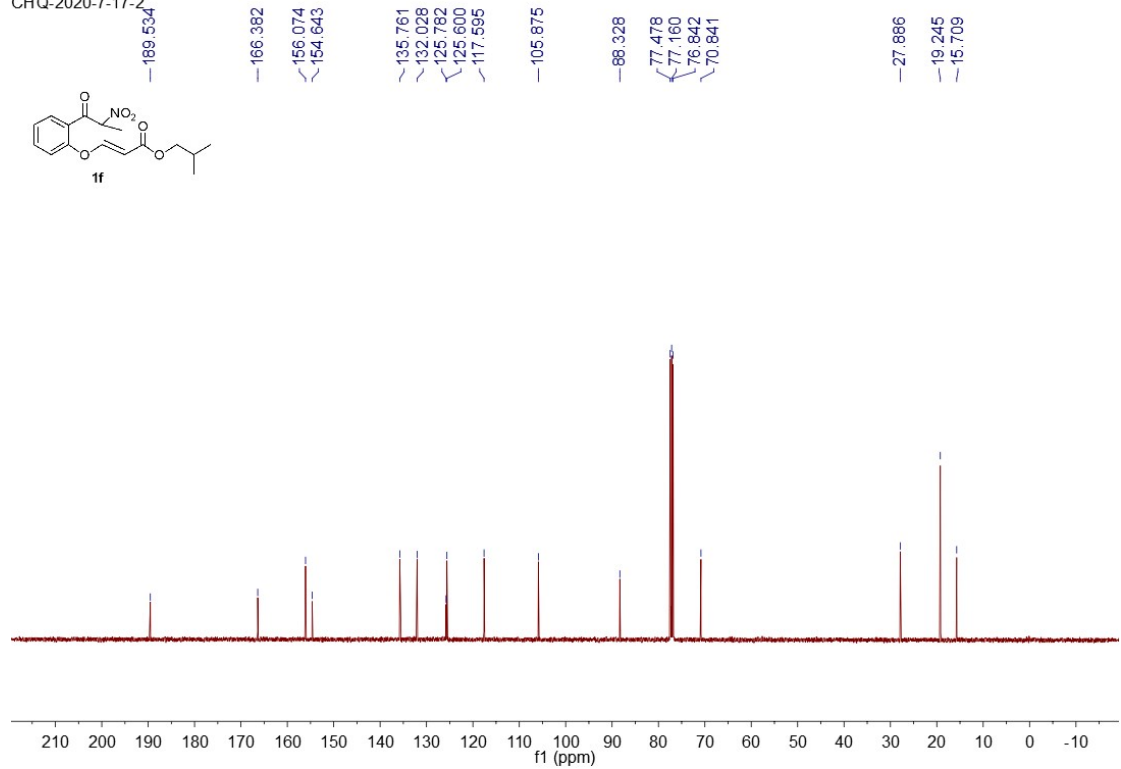

CHQ-2020-9-11-1

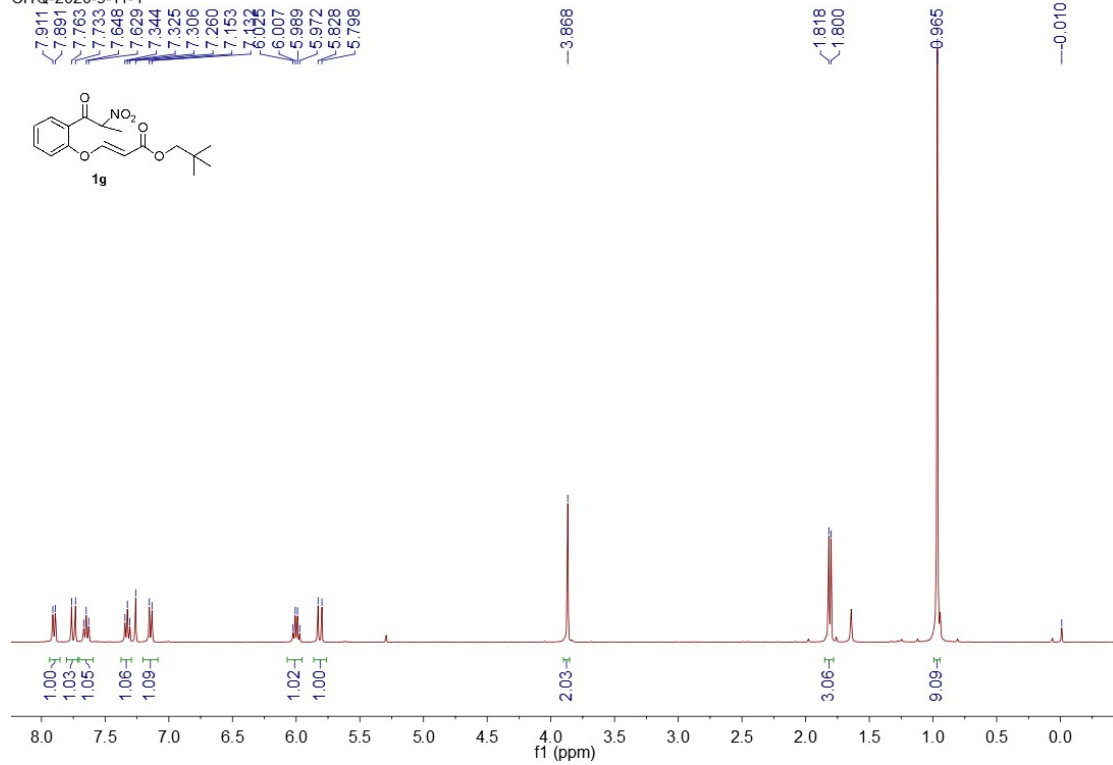

CHQ-2020-9-11-1

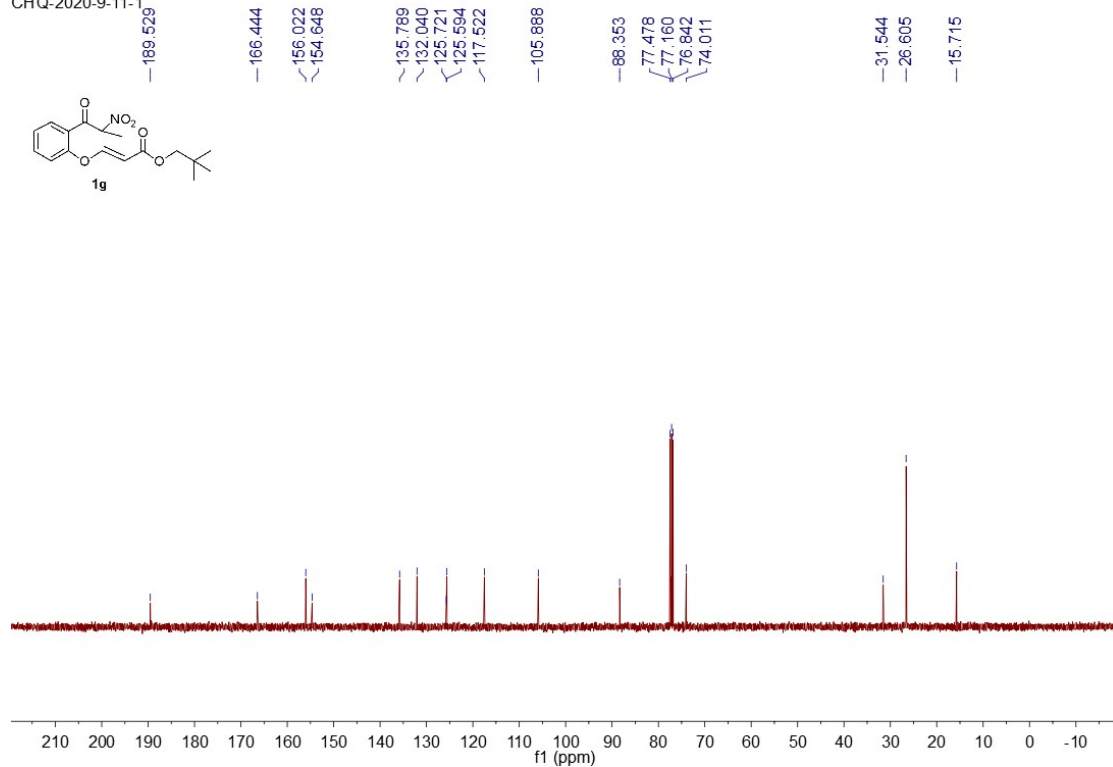

CHQ-2020-9-24-1

7.879  
7.876  
7.859  
7.856  
7.766  
7.735  
7.660  
7.618  
7.338  
7.300  
7.260  
7.148  
7.127  
5.881  
5.846  
5.829  
5.799

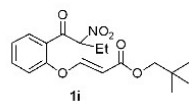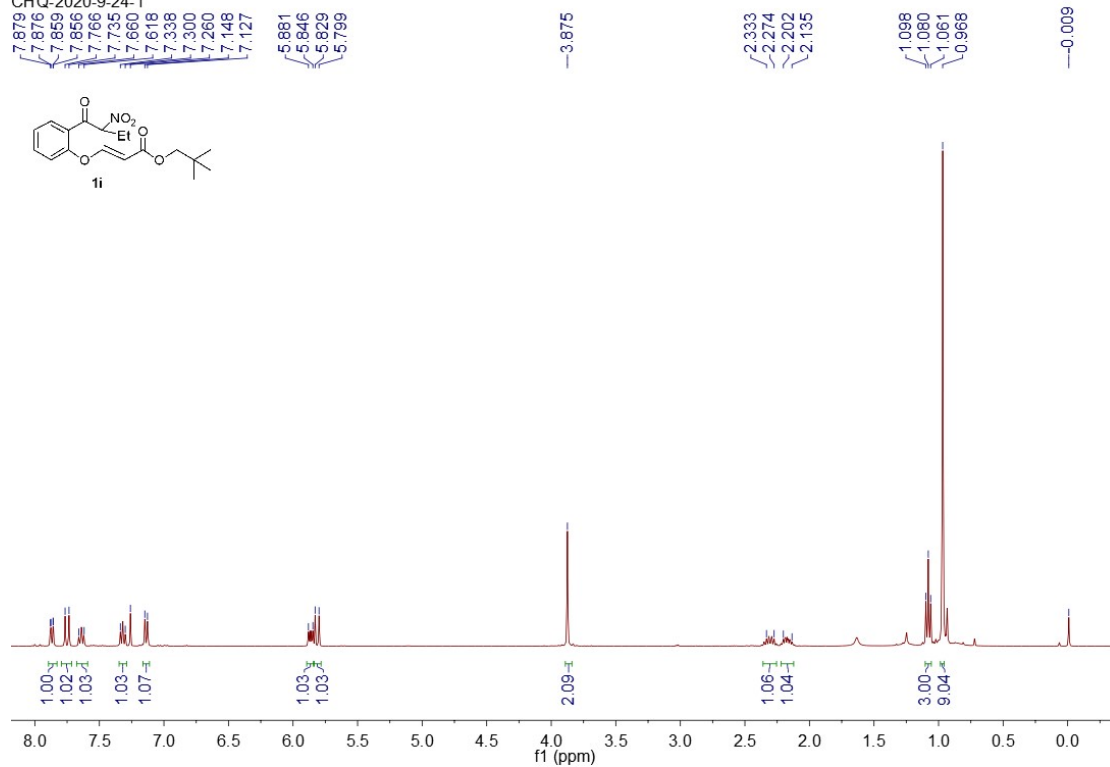

CHQ-2020-9-24-1

189.077  
166.440  
156.151  
154.555  
135.669  
131.940  
126.088  
125.620  
117.637  
105.859  
94.988  
77.478  
77.160  
76.843  
74.013  
31.564  
26.613  
23.977  
10.997

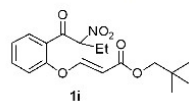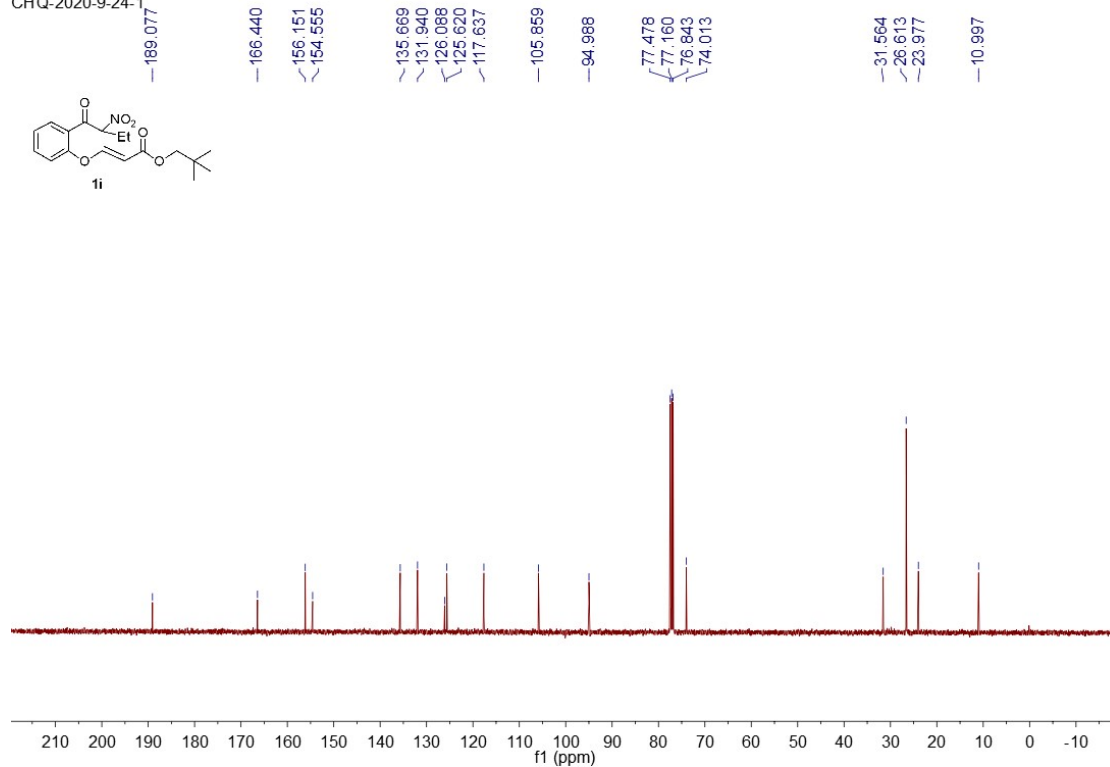

CHQ-2020-9-21-2

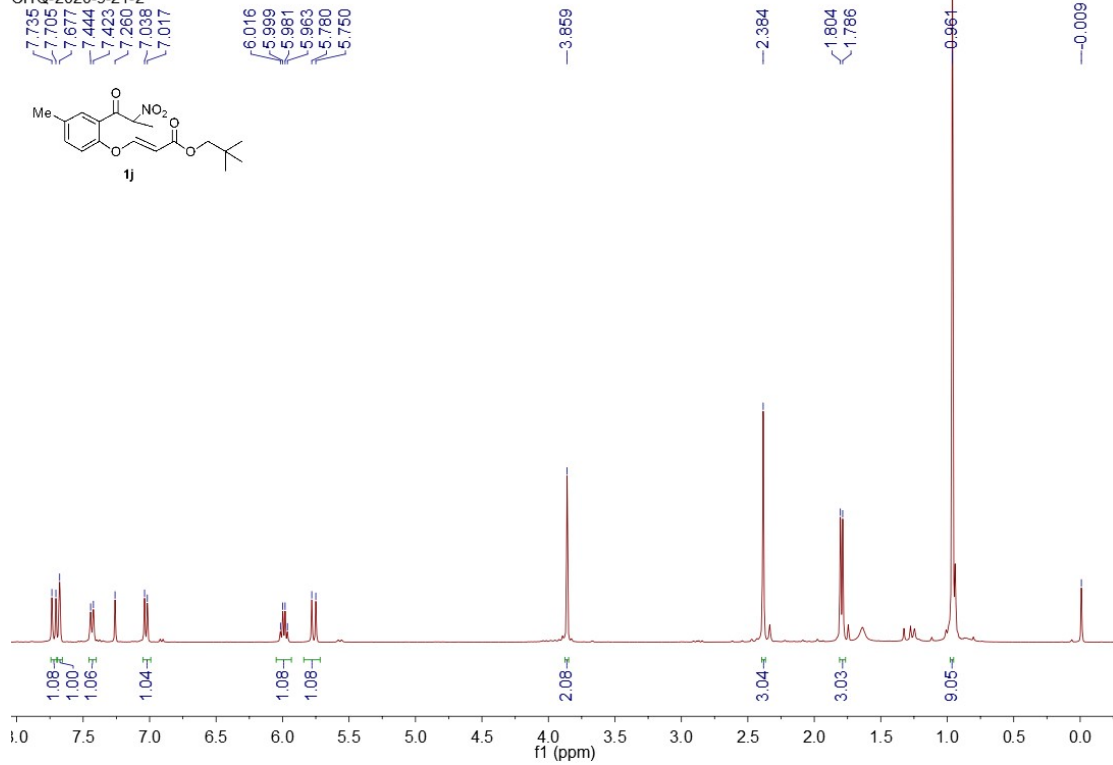

CHQ-2020-9-21-2

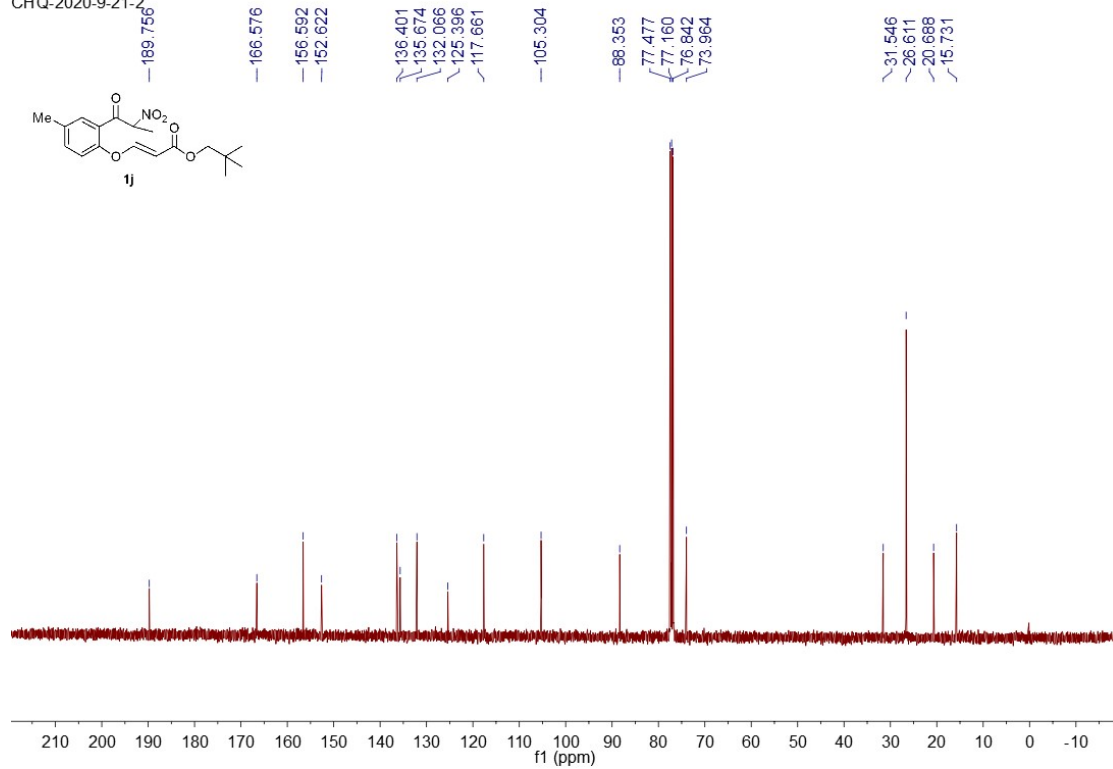

CHQ-2020-11-24-1

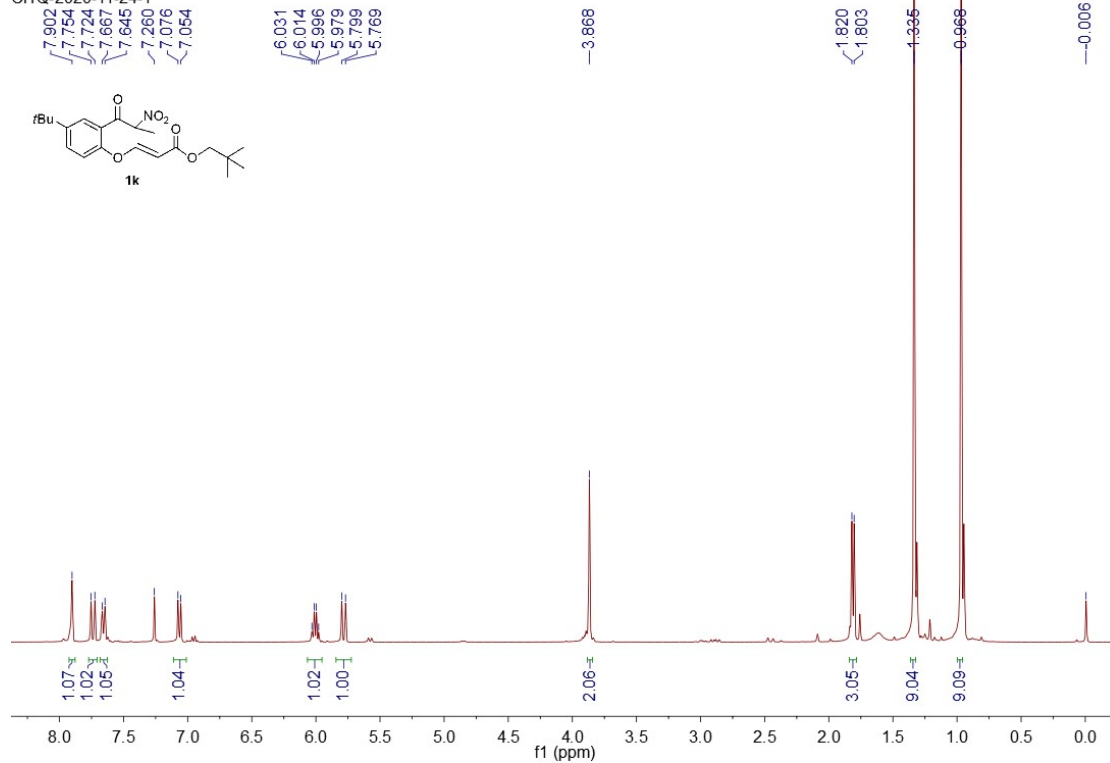

CHQ-2020-11-24-1

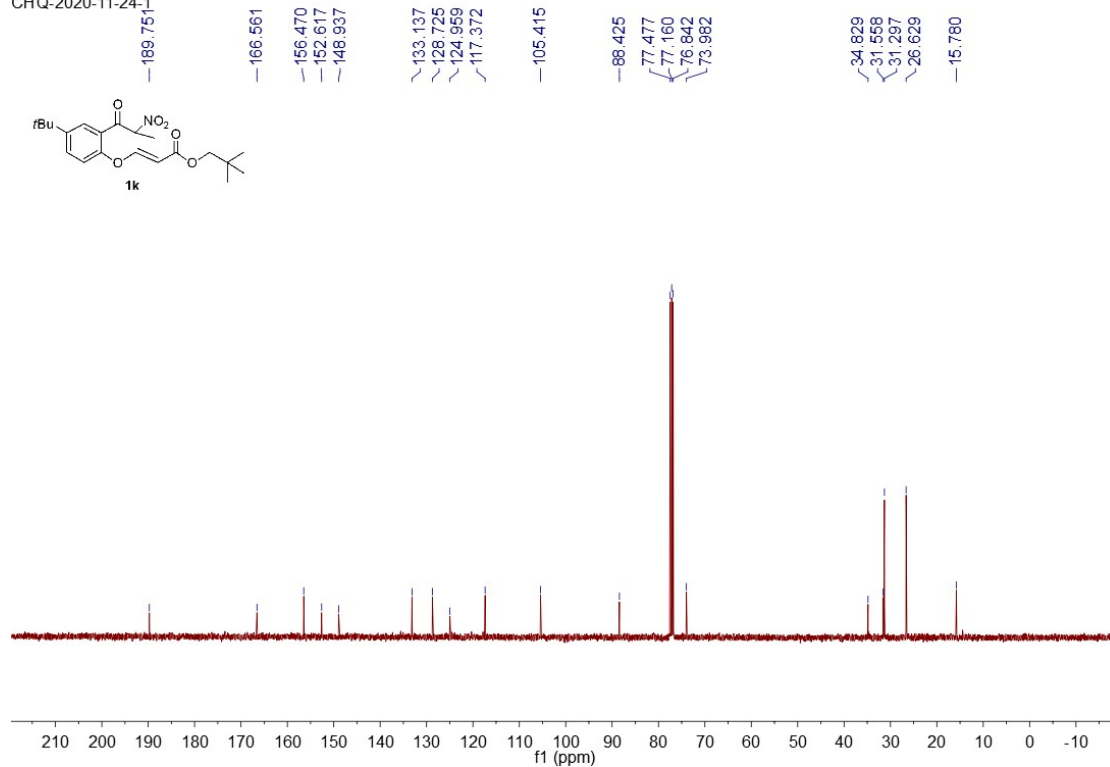

CHQ-2020-9-21-4

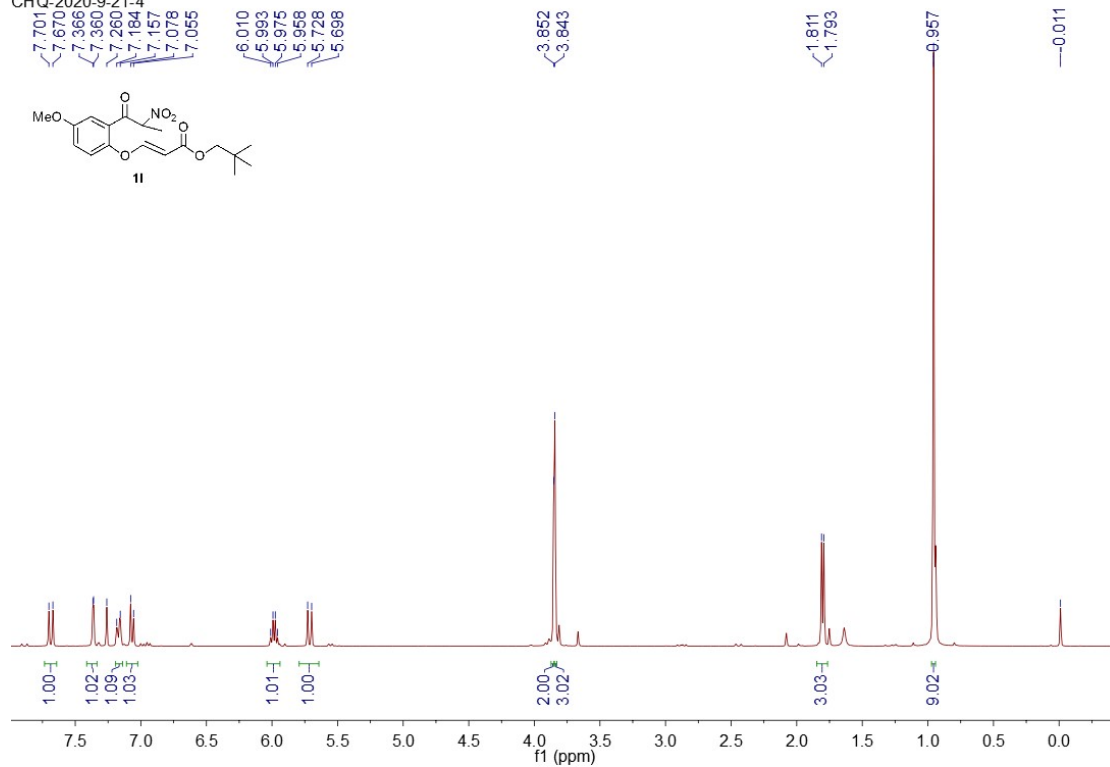

CHQ-2020-9-21-4

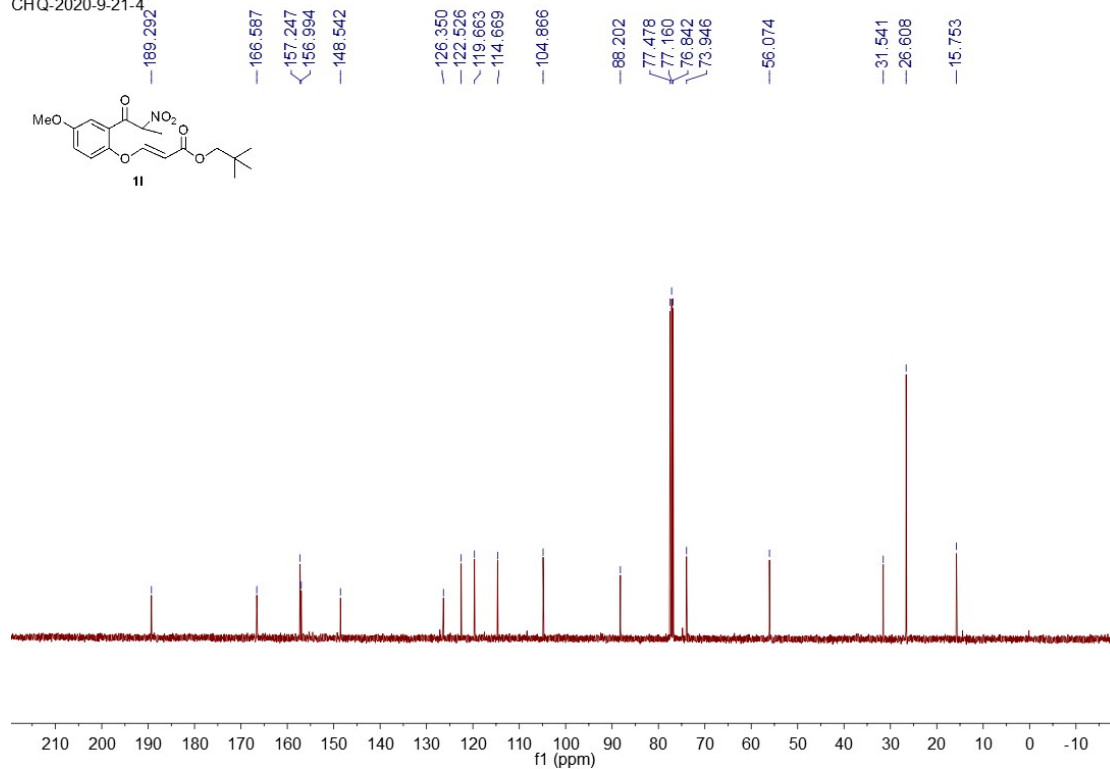



CHQ-2020-9-21-3

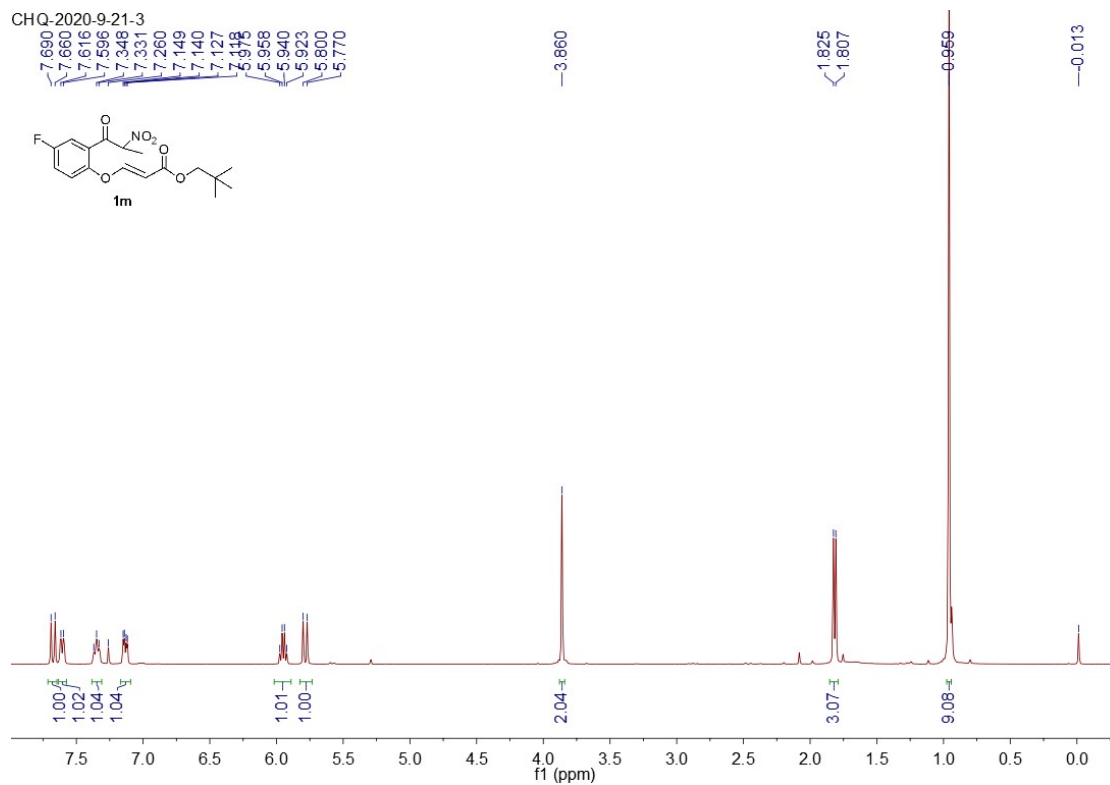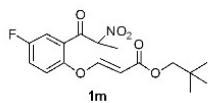

CHQ-2020-9-21-3

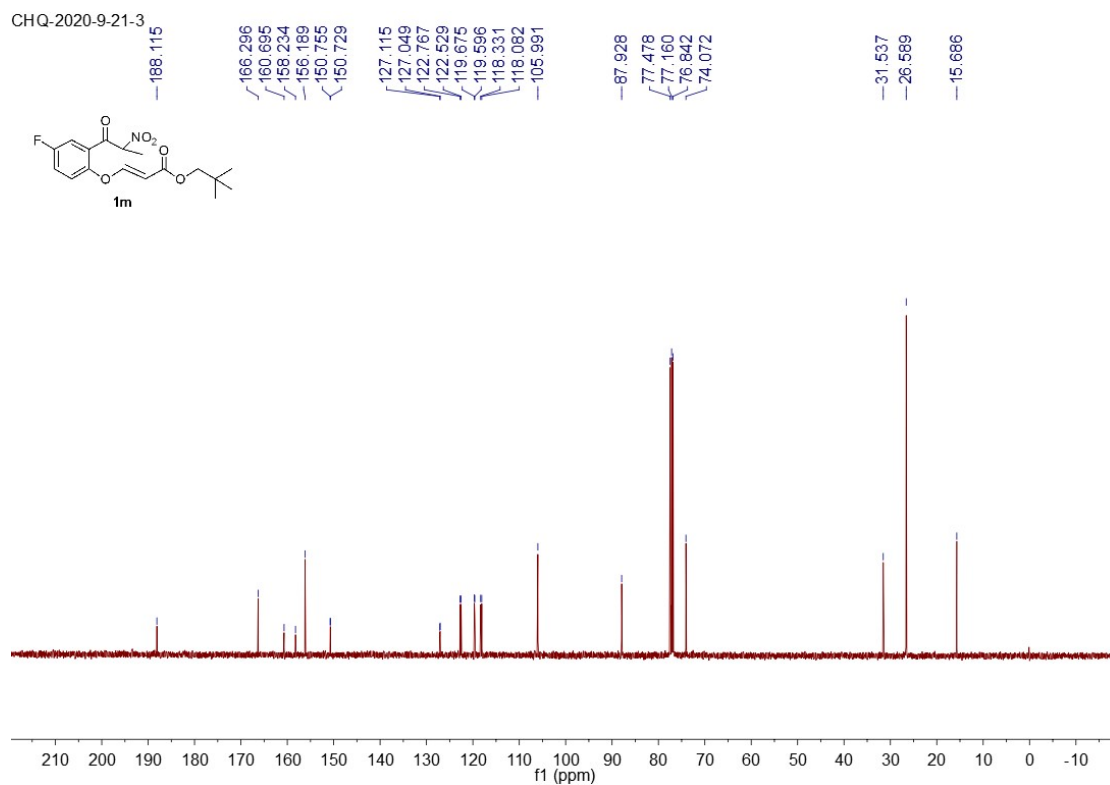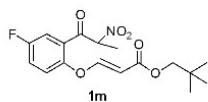

CHQ-2020-10-19-3

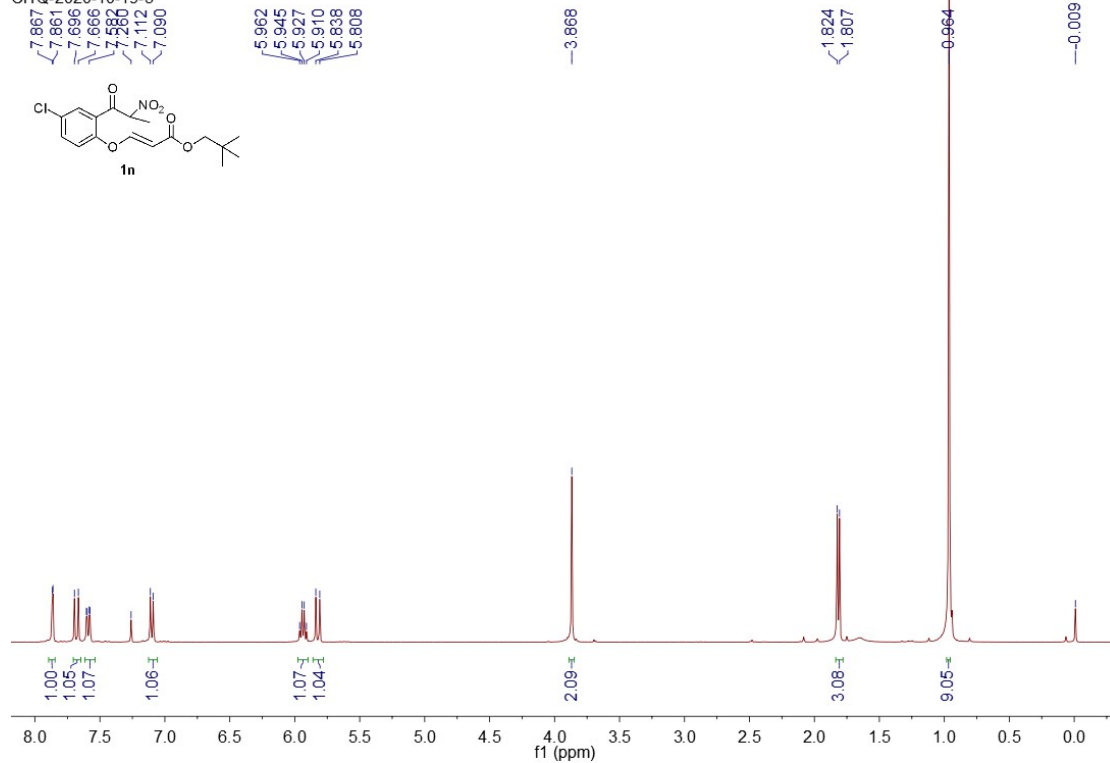

CHQ-2020-12-24-2

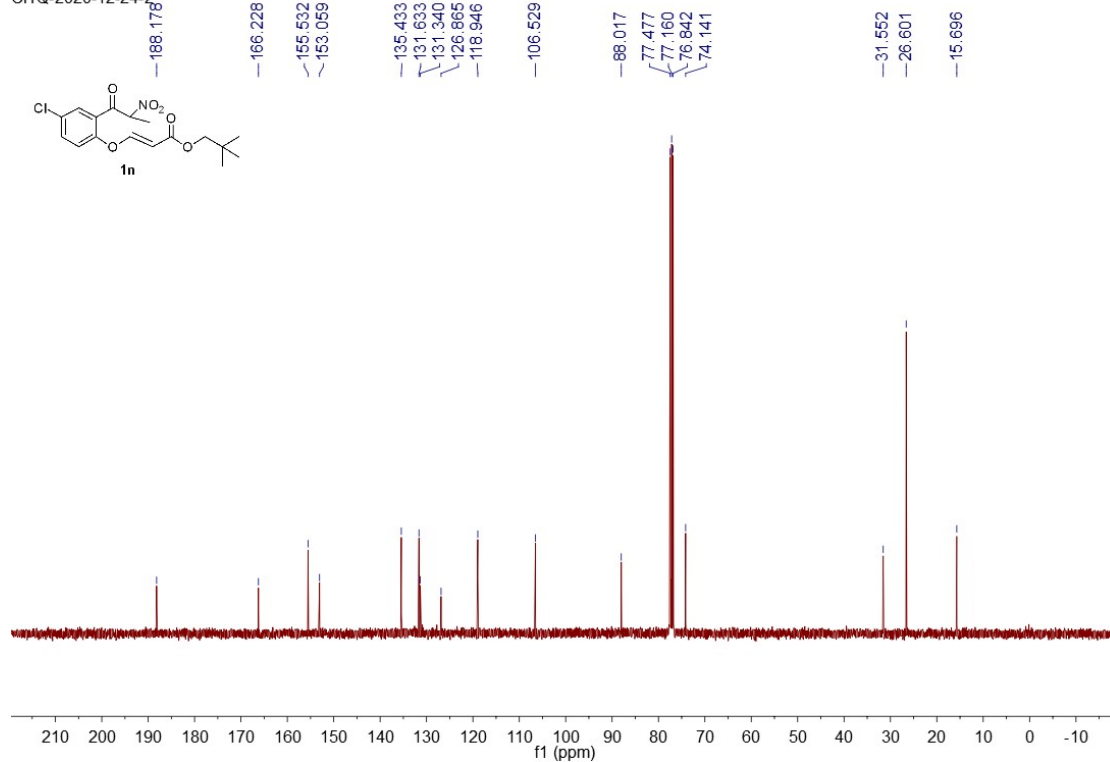

CHQ-2020-10-19-4

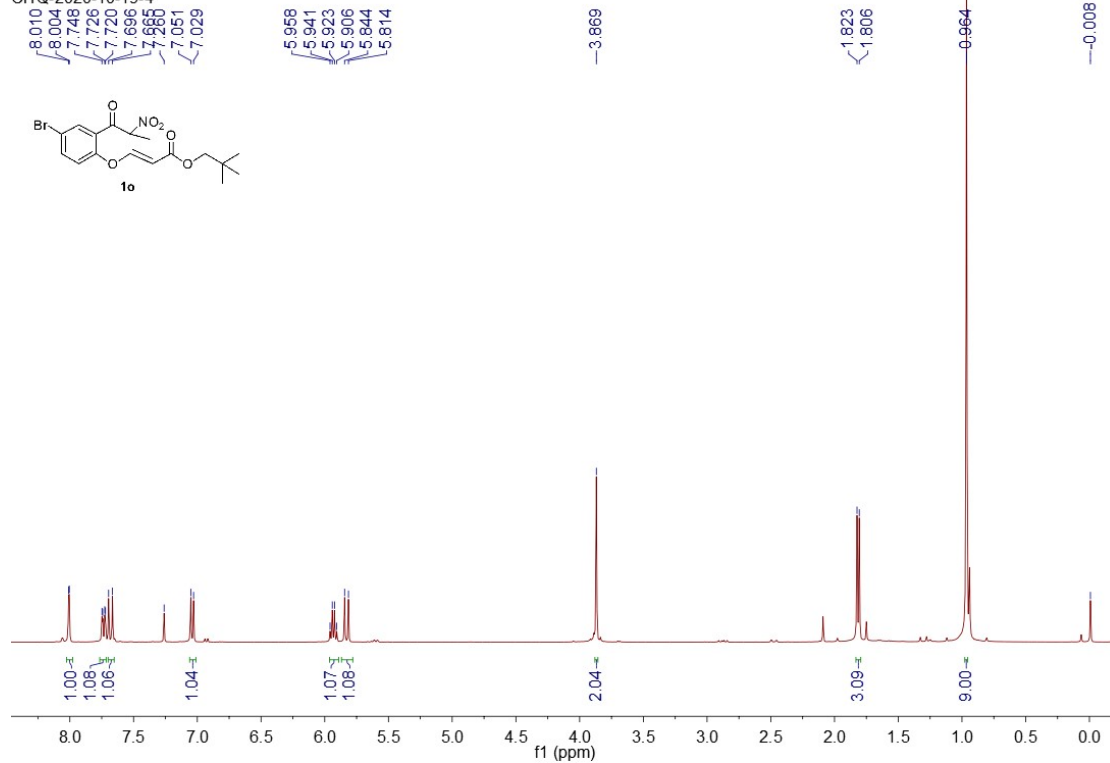

CHQ-2020-12-24-3

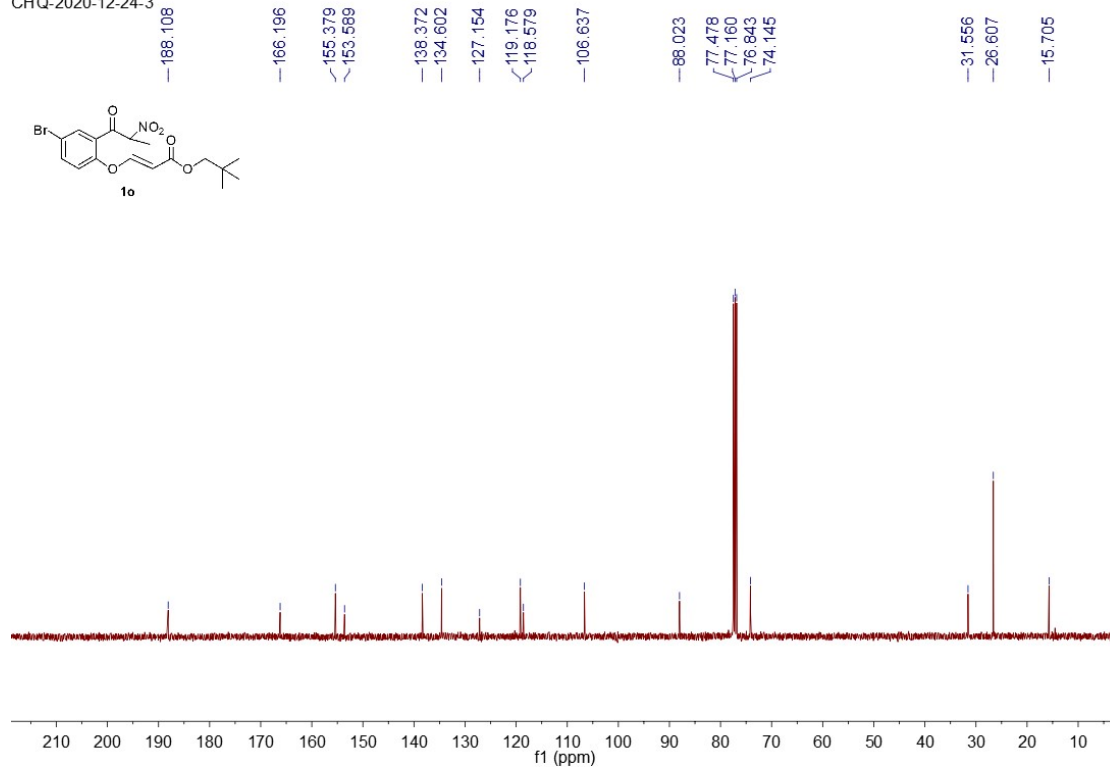

CHQ-2020-11-30-1

7.718  
7.687  
7.559  
7.501  
7.260  
7.051  
7.008  
6.979  
6.958

5.796  
5.778  
5.767  
5.737

-3.854

1.814  
1.796

-0.957

-0.008

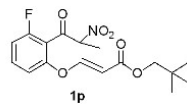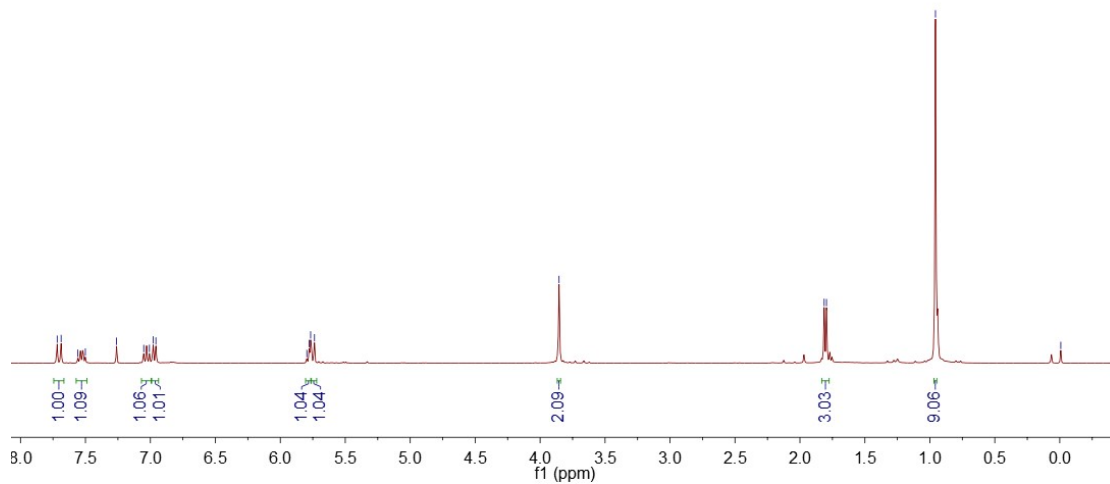

CHQ-2020-11-30-1

188.140

166.494  
161.541  
159.008  
156.365  
154.148  
154.087

134.253  
134.150

116.822  
116.639  
113.275  
113.240  
113.029  
112.813  
105.659

-89.310

77.478  
77.160  
76.842  
73.977

-31.541  
-26.599

-15.032

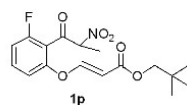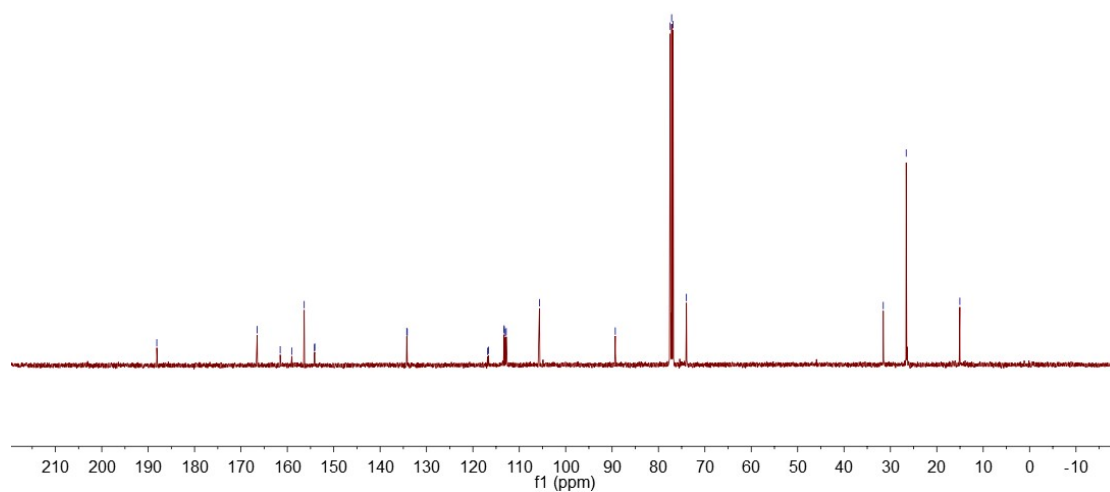

CHQ-2020-12-1-1

7.708  
7.679  
7.478  
7.437  
7.300  
7.278  
7.260  
7.083  
7.062

5.791  
5.774  
5.755  
5.744

3.854

1.822  
1.805

0.957

0.006

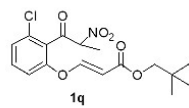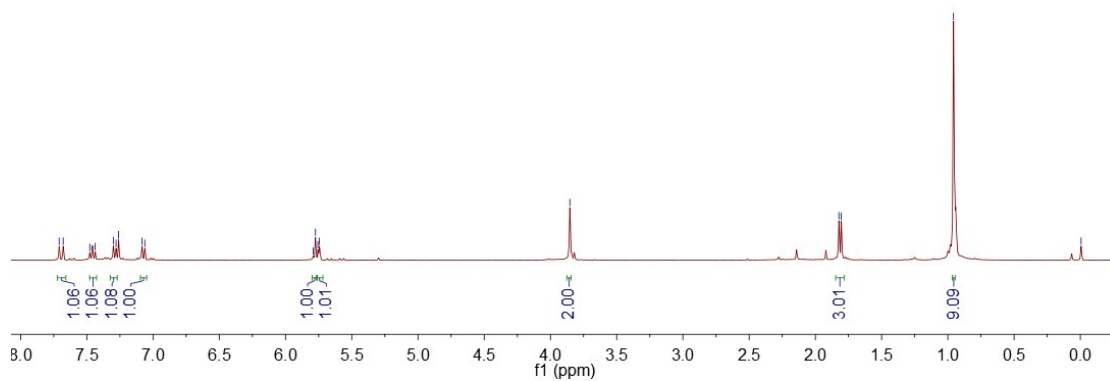

CHQ-2020-12-1-1

190.944

166.512

156.096  
153.468

132.905  
132.272  
127.446  
126.530

115.333

105.761

89.508

77.478  
77.160  
76.843  
74.021

31.543  
26.604

14.848

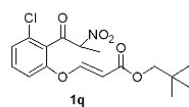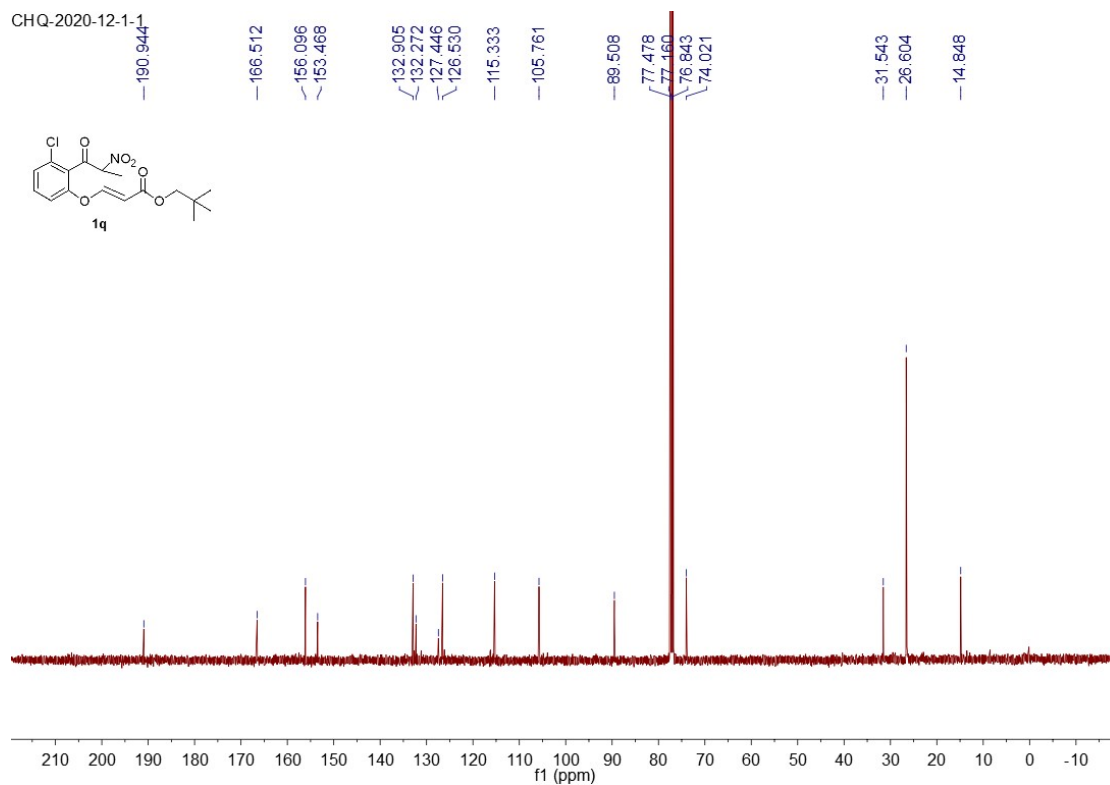

CHQ-2020-11-24-2

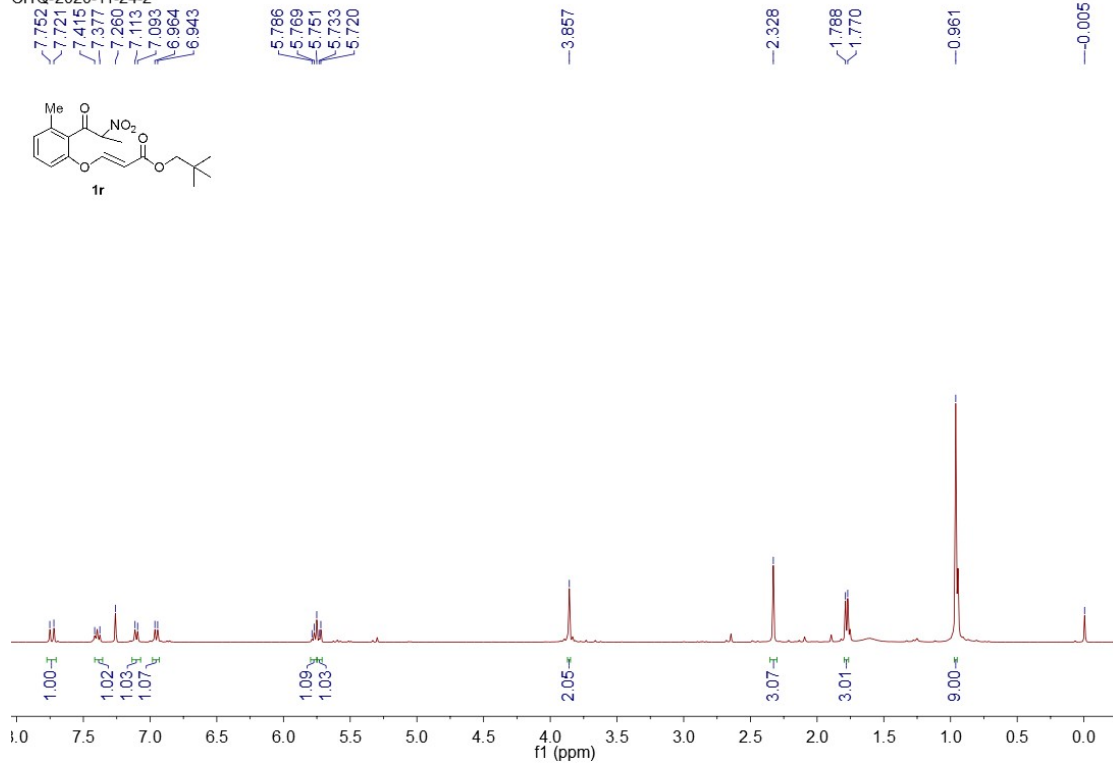

CHQ-2020-11-24-2

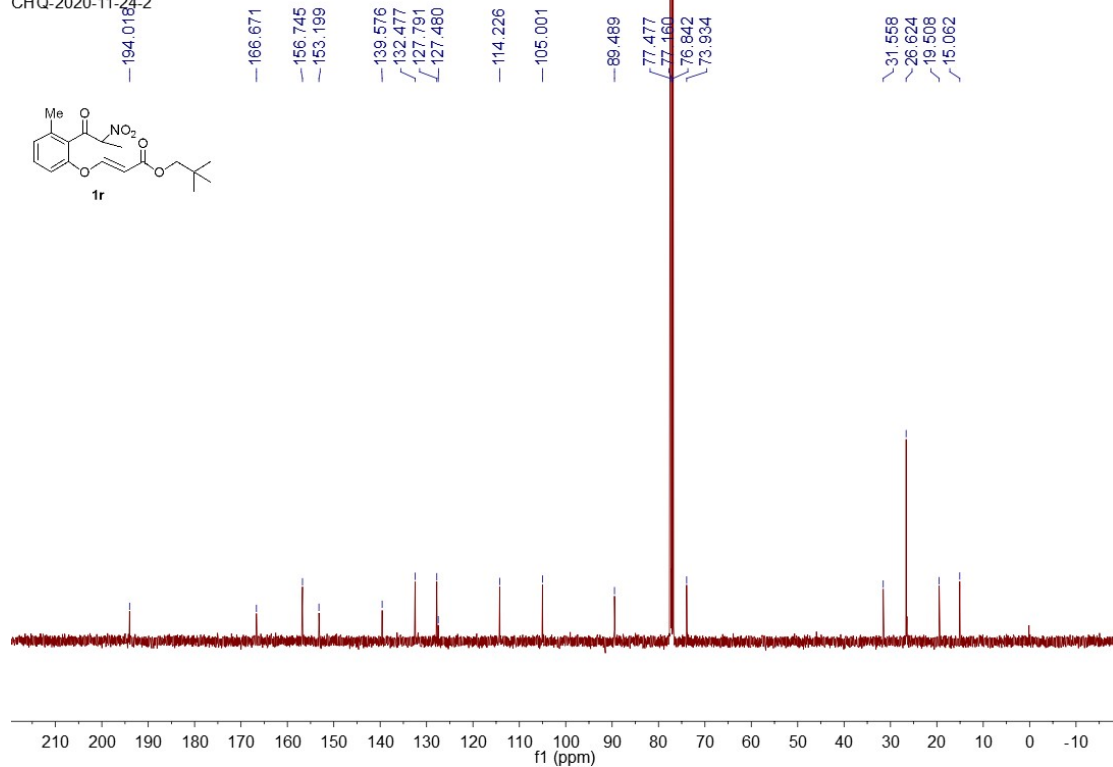

CHQ-2020-11-27-3

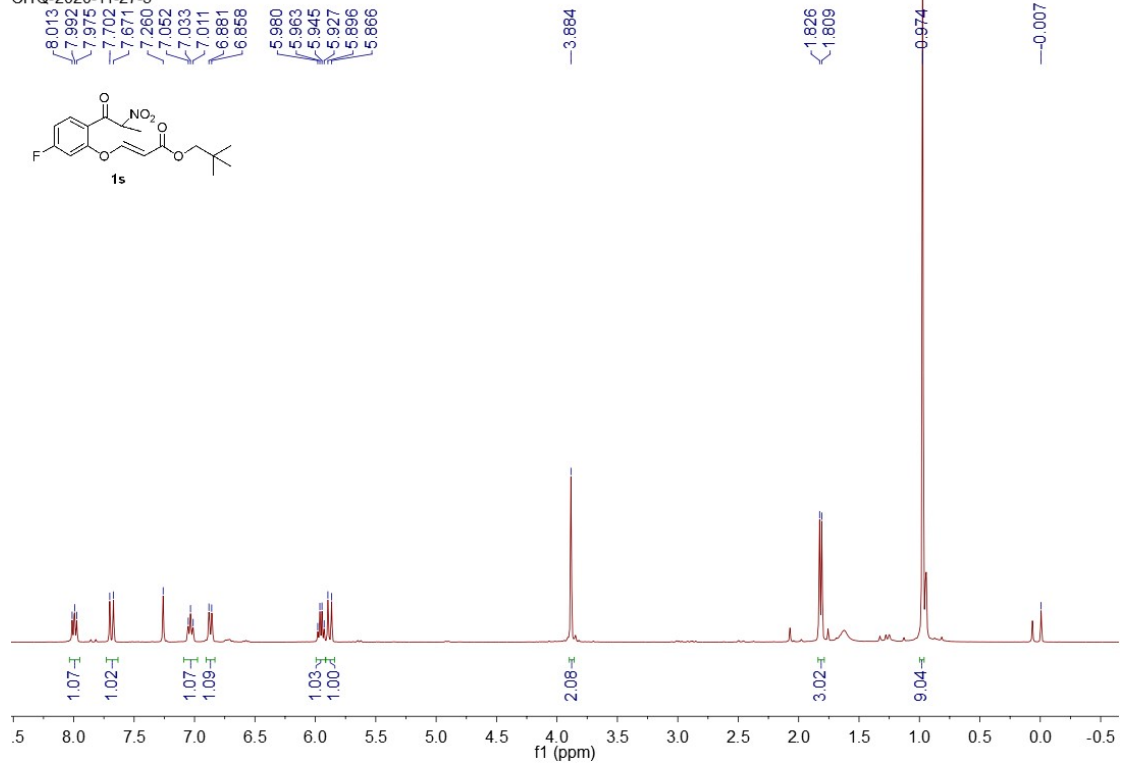

CHQ-2020-11-27-3

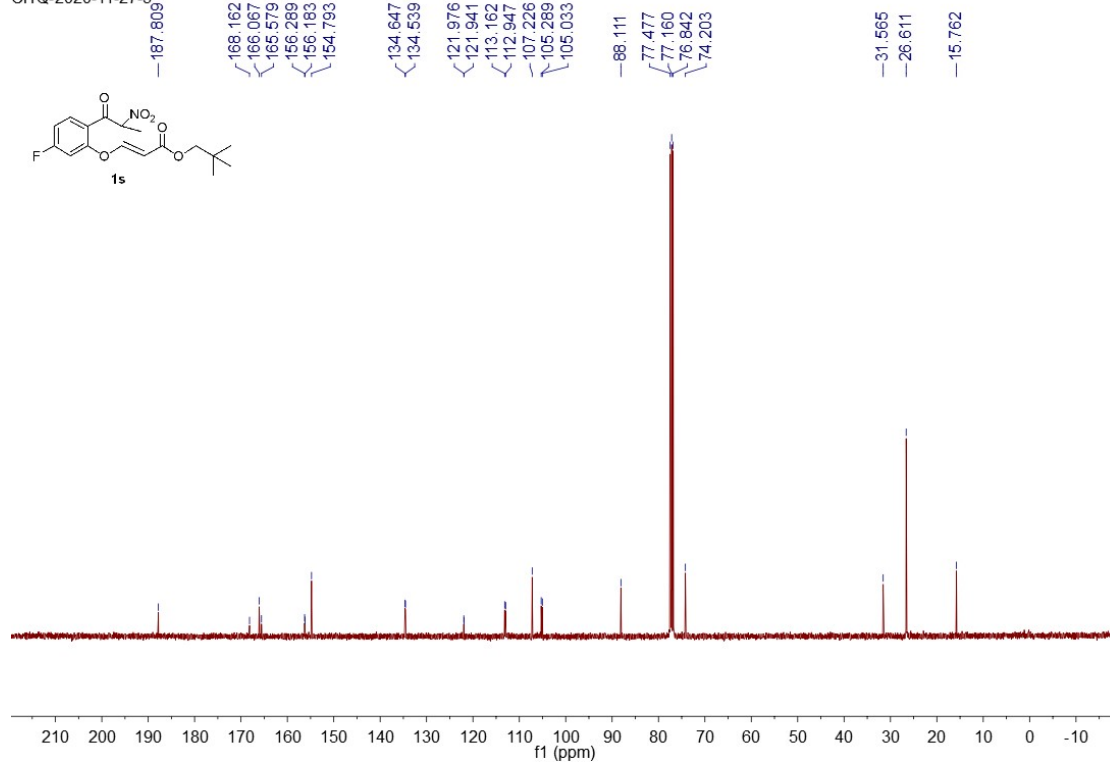

CHQ-2020-12-1-2

7.895  
7.873  
7.707  
7.677  
7.314  
7.292  
7.260  
7.149

5.966  
5.949  
5.931  
5.914  
5.883  
5.853

-3.886

1.822  
1.804

-0.975

-0.007

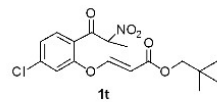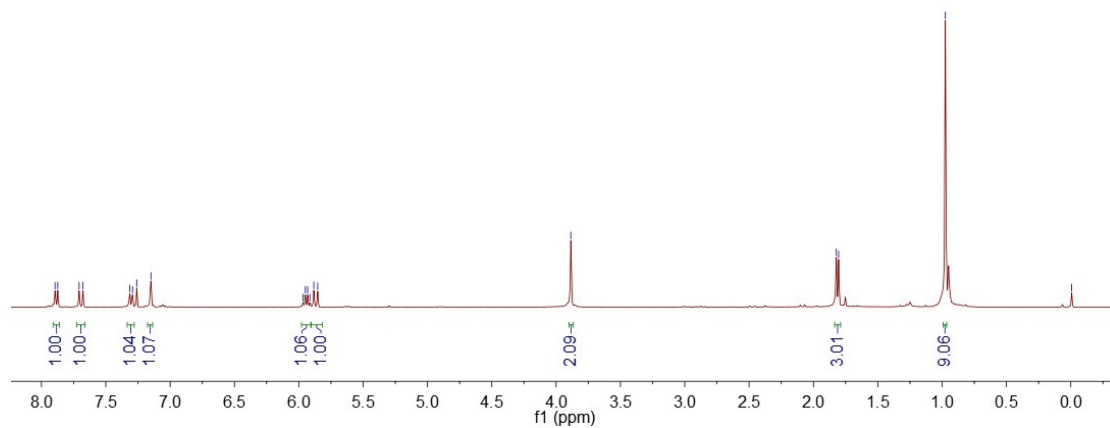

CHQ-2020-12-1-2

-188.170

-166.151

155.041  
155.003

-141.947

133.224

125.993

123.999

117.837

-107.095

-88.121

77.478

77.160

76.843

74.205

-31.564

-26.611

-15.716

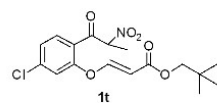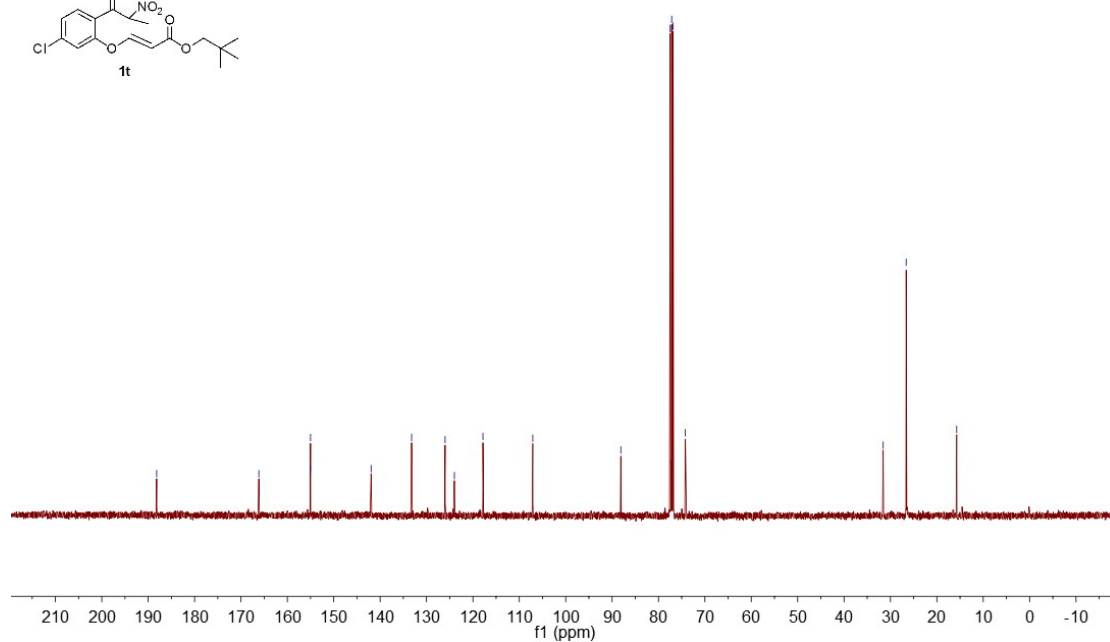



CHQ-2020-11-24-3

7.834  
7.814  
7.753  
7.723  
7.260  
7.131  
7.111  
6.925  
6.013  
5.996  
5.978  
5.961  
5.822  
5.792

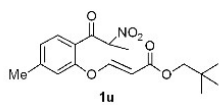

-3.874

-2.439

1.803  
1.786

-0.971

-0.008

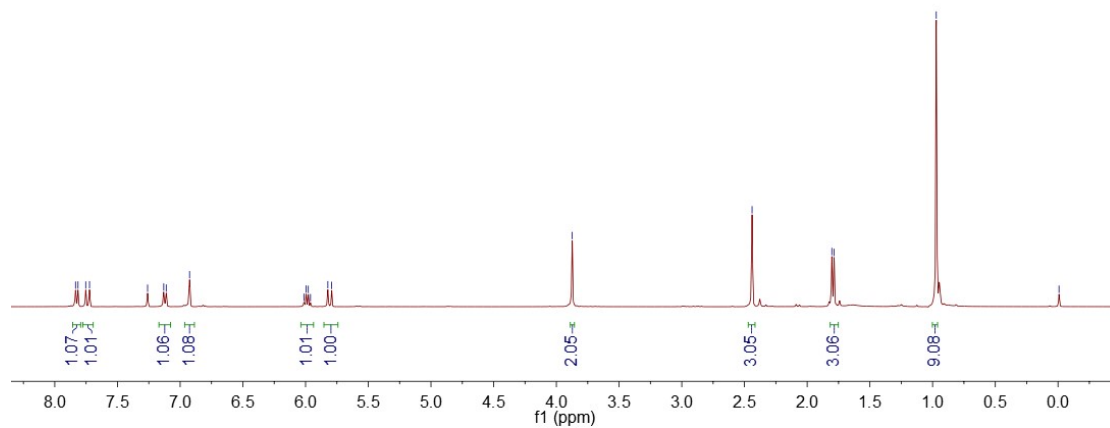

CHQ-2020-11-24-3

188.895  
166.614  
156.177  
154.850  
147.788  
132.071  
126.530  
122.903  
118.099  
105.701  
88.320  
77.478  
77.160  
76.843  
74.018  
31.557  
26.614  
21.909  
15.768

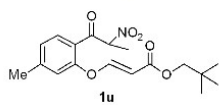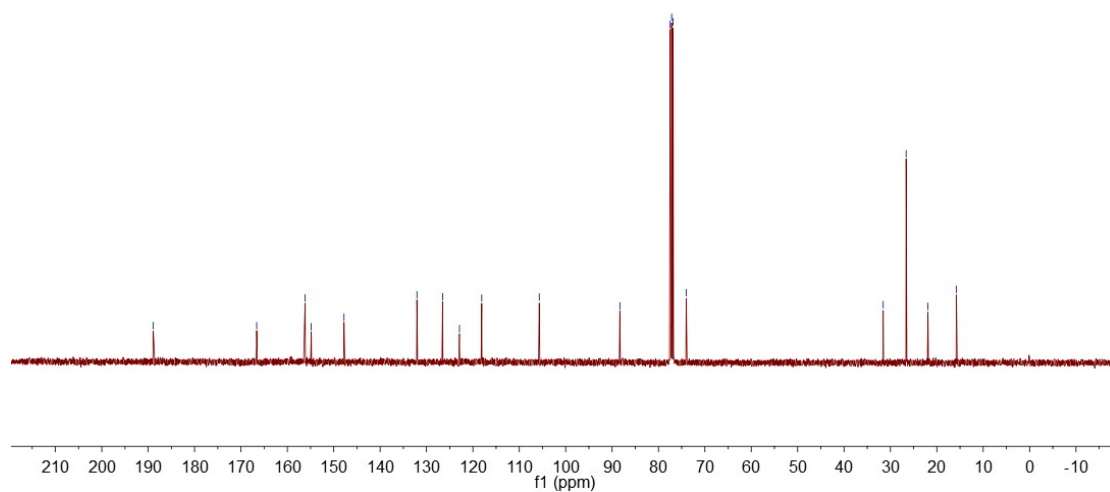

CHQ-2020-12-28-3

7.692  
7.661  
7.646  
7.627  
7.484  
7.438  
7.376  
7.324  
7.260

5.920  
5.903  
5.885  
5.867  
5.552  
5.521

-3.838

1.812  
1.795

-0.946

-0.009

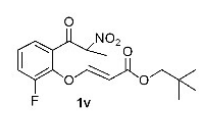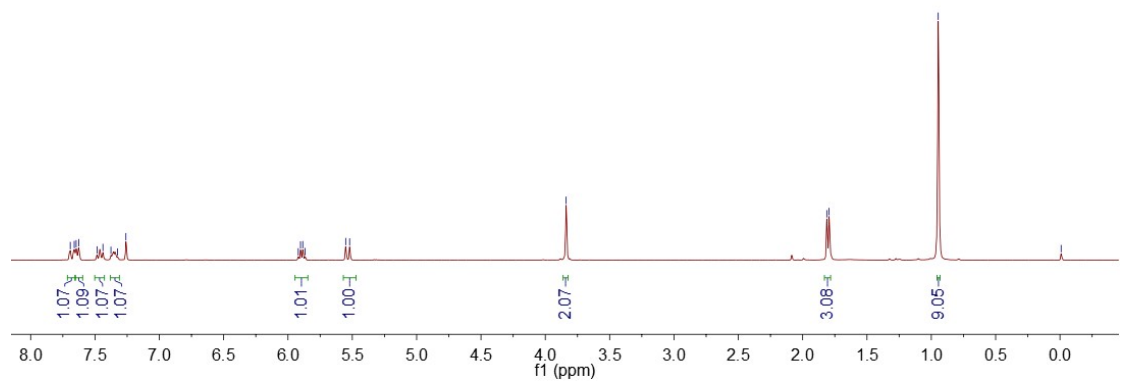

CHQ-2020-12-28-3

188.713

166.209  
158.902  
158.866  
155.308  
152.790  
141.694  
141.566  
129.549  
127.192  
127.118  
126.473  
126.438  
122.807  
122.621  
103.518

87.785  
77.477  
77.160  
76.842  
73.983

31.529  
26.599  
15.661

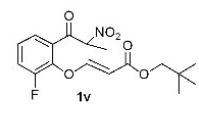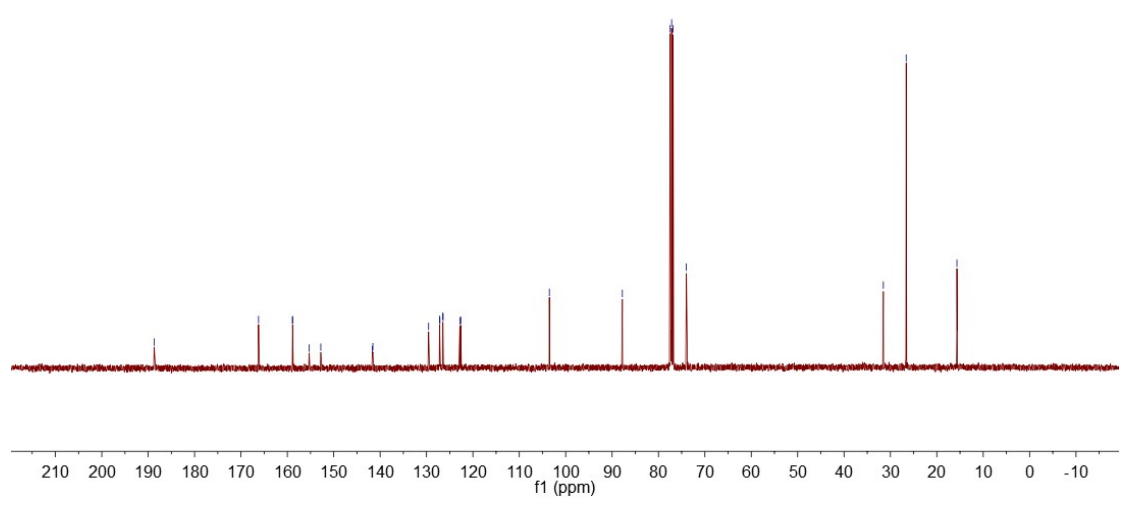

CHQ-2020-12-1-3

7.724  
7.720  
7.704  
7.700  
7.641  
7.610  
7.390  
7.350  
7.260

5.917  
5.900  
5.882  
5.864  
5.371  
5.340

3.831

1.801  
1.783

0.941

0.006

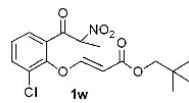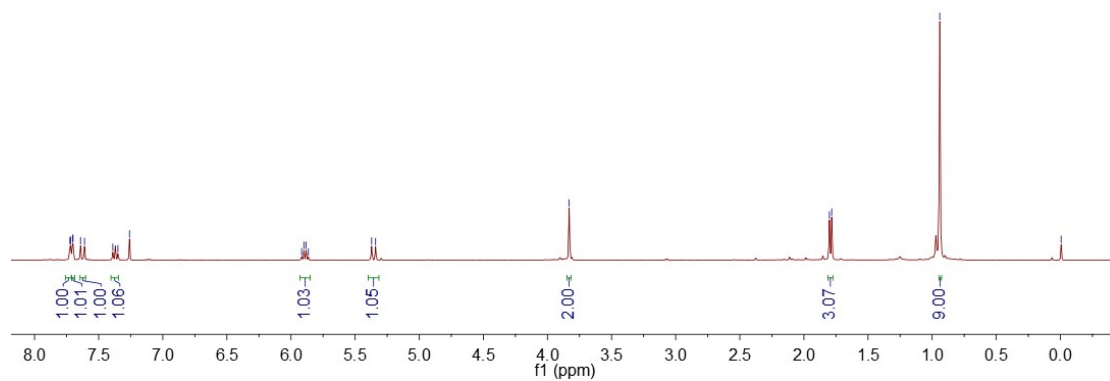

CHQ-2020-12-1-3

189.387  
166.319  
159.006  
149.282

136.175  
130.387  
129.542  
128.279  
127.653

103.009

87.600  
77.477  
77.160  
76.842  
73.970

31.534  
26.609  
15.730

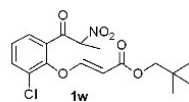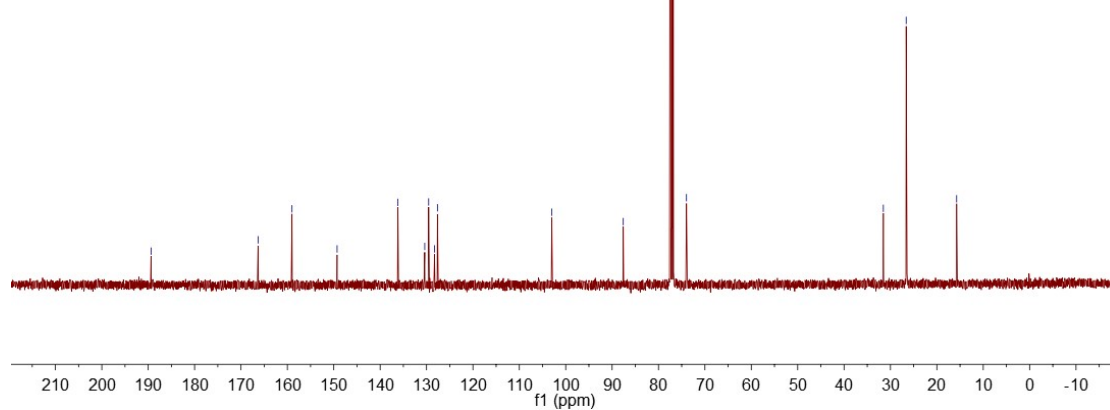

CHQ-12-10-2

7.946  
7.926  
7.554  
7.260  
7.156  
7.118  
7.032  
7.011

5.611  
5.605  
5.586  
5.580

4.244  
4.226  
4.208  
4.190

2.885  
2.860  
2.845  
2.820  
2.467  
2.461  
2.427  
2.421

1.740

1.295  
1.277  
1.260

-0.018

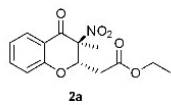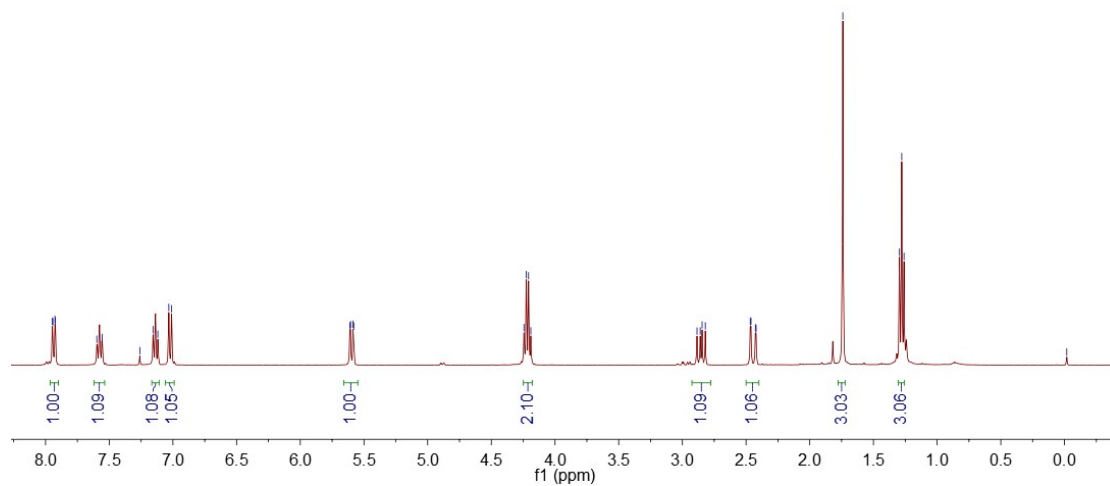

CHQ-2021-7-20-1

165.059

168.519

159.798

137.648

128.597

123.282

118.360

118.266

92.280

78.130

77.478

77.160

76.842

61.656

34.652

14.471

14.253

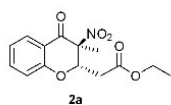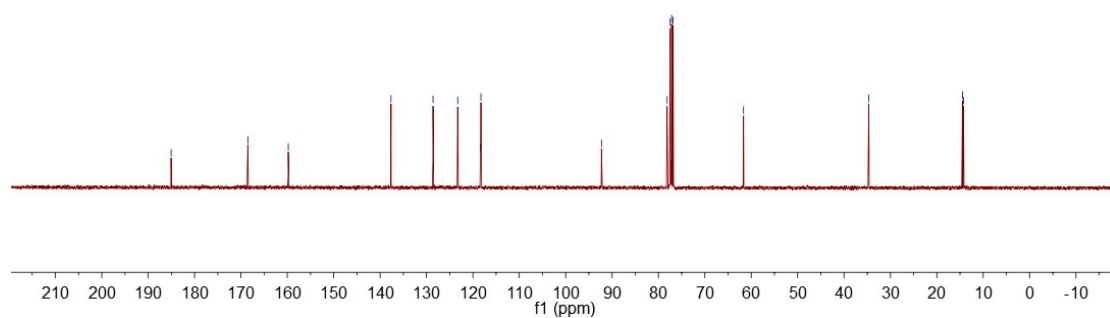

CHQ-2021-1-18-3

7.970  
7.951  
7.610  
7.571  
7.260  
7.173  
7.136  
7.038  
7.017

5.622  
5.597

4.212  
4.152

2.897  
2.871  
2.857  
2.832  
2.474  
2.434

1.756  
1.677  
1.606  
1.417  
1.361  
0.958  
0.939  
0.921

-0.002

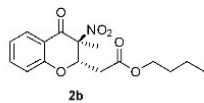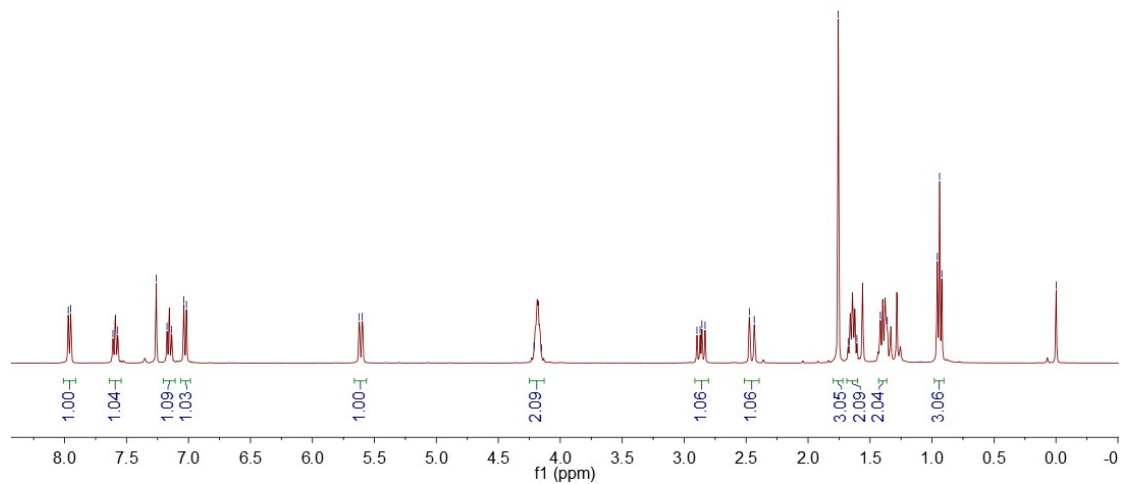

CHQ-2021-7-21-1

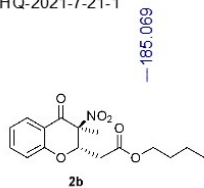

165.069  
168.597  
159.791  
137.636  
128.615  
123.289  
118.364  
118.249  
92.287  
78.162  
77.477  
77.160  
76.842  
65.515  
34.666  
30.642  
19.165  
14.466  
13.767

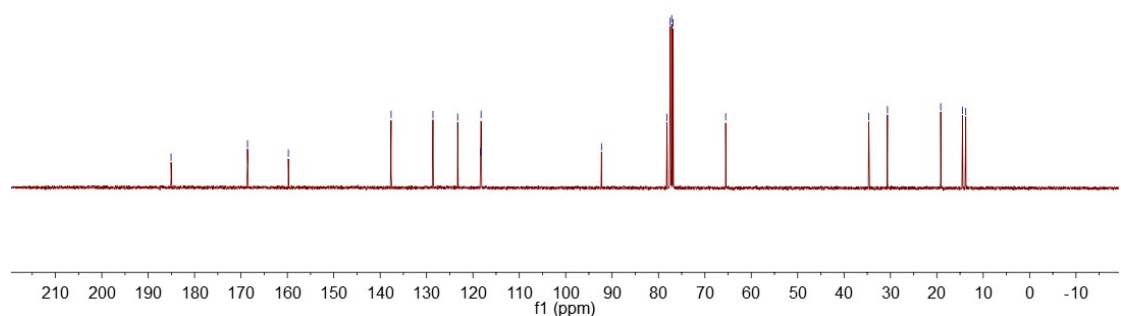

CHQ-2020-12-30-1

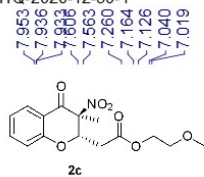

5.628  
5.623  
5.603  
5.598

4.335  
4.307

3.622  
3.611  
3.599  
3.362

2.965  
2.925  
2.910  
2.509  
2.474  
2.469

-1.744

-0.012

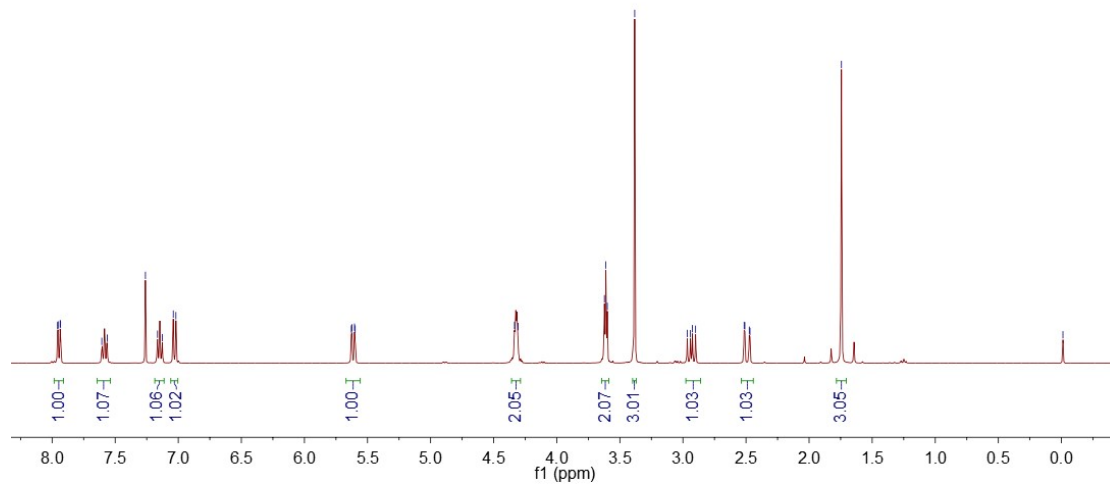

CHQ-2020-12-30-1

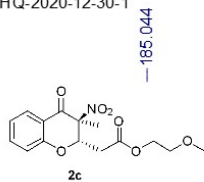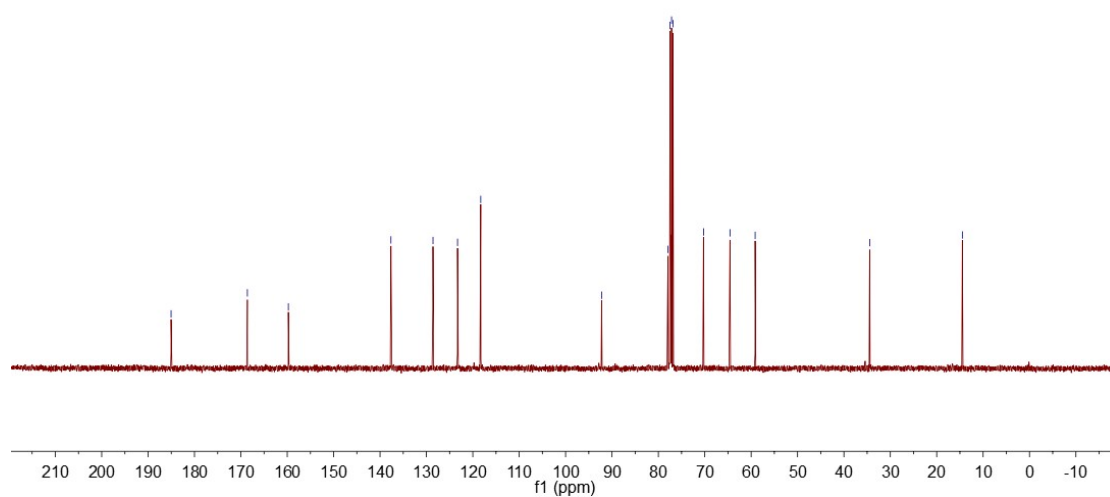

CHQ-2020-8-3-1

7.967  
7.948  
7.606  
7.567  
7.260  
7.172  
7.134  
7.038  
7.017

5.622  
5.617  
5.597  
5.592

4.199  
4.134

2.896  
2.871  
2.856  
2.831  
2.473  
2.468  
2.433  
2.428

1.754  
1.681  
1.612  
1.329  
1.264  
0.892  
0.876  
0.858

-0.005

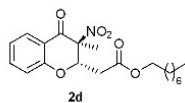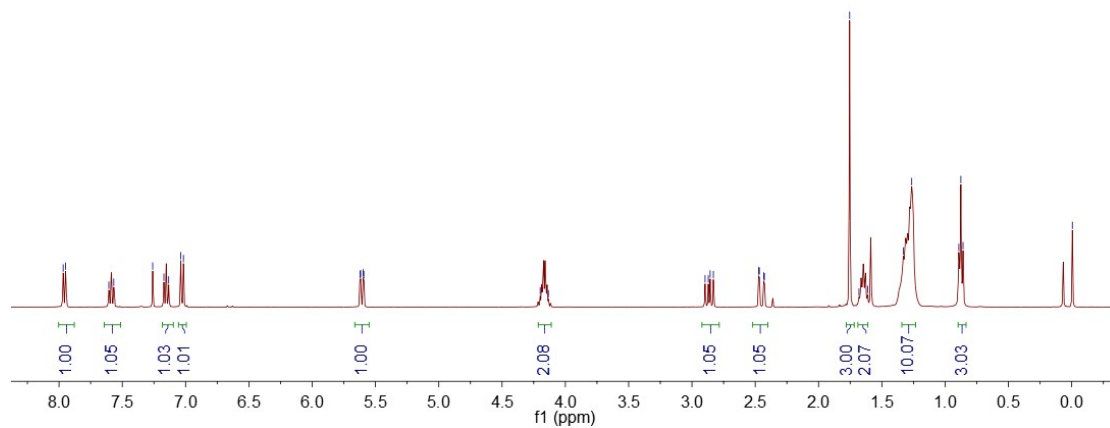

CHQ-2020-8-3-1

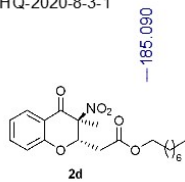

165.090  
168.601  
159.802  
137.636  
128.638  
123.298  
118.368  
118.267  
92.288  
78.158  
77.477  
77.160  
76.842  
65.656  
34.679  
31.891  
29.300  
28.643  
25.985  
22.768  
14.477  
14.219

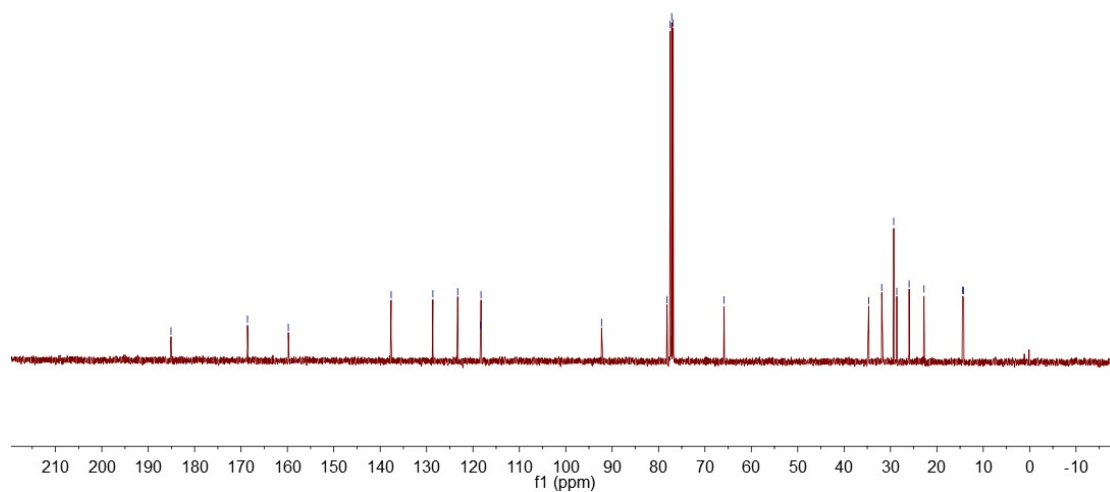

CHQ-2020-7-31-2

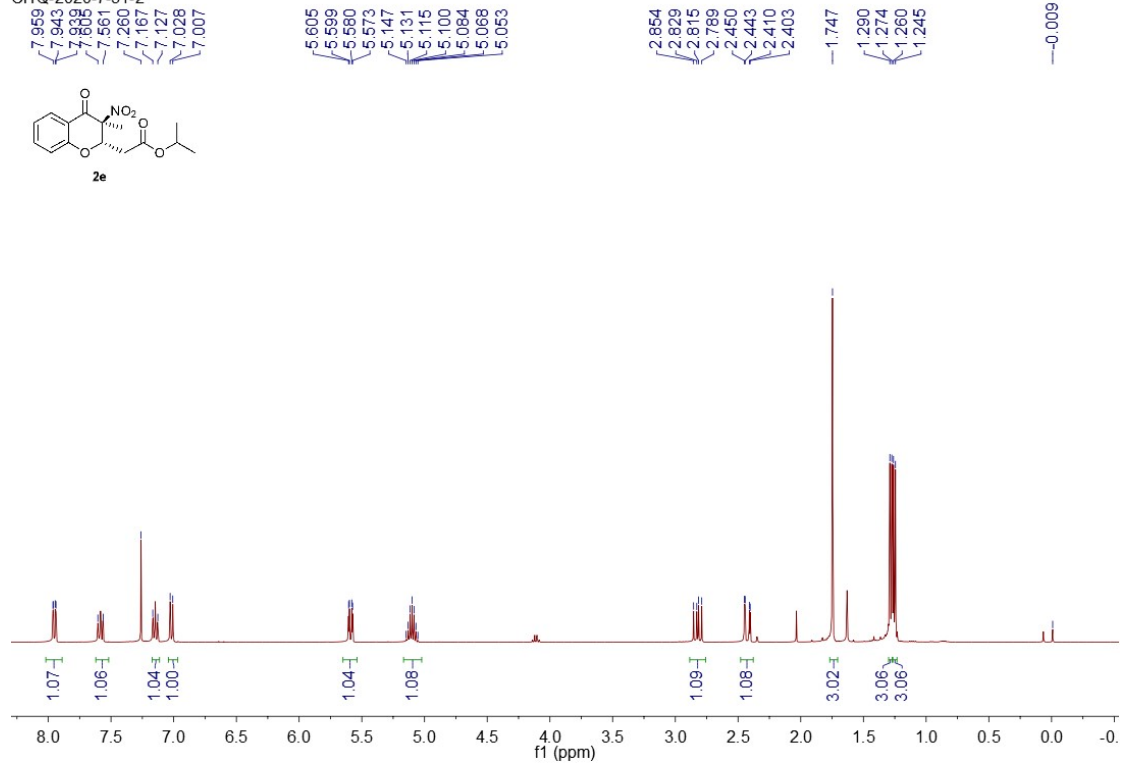

CHQ-2020-7-31-2

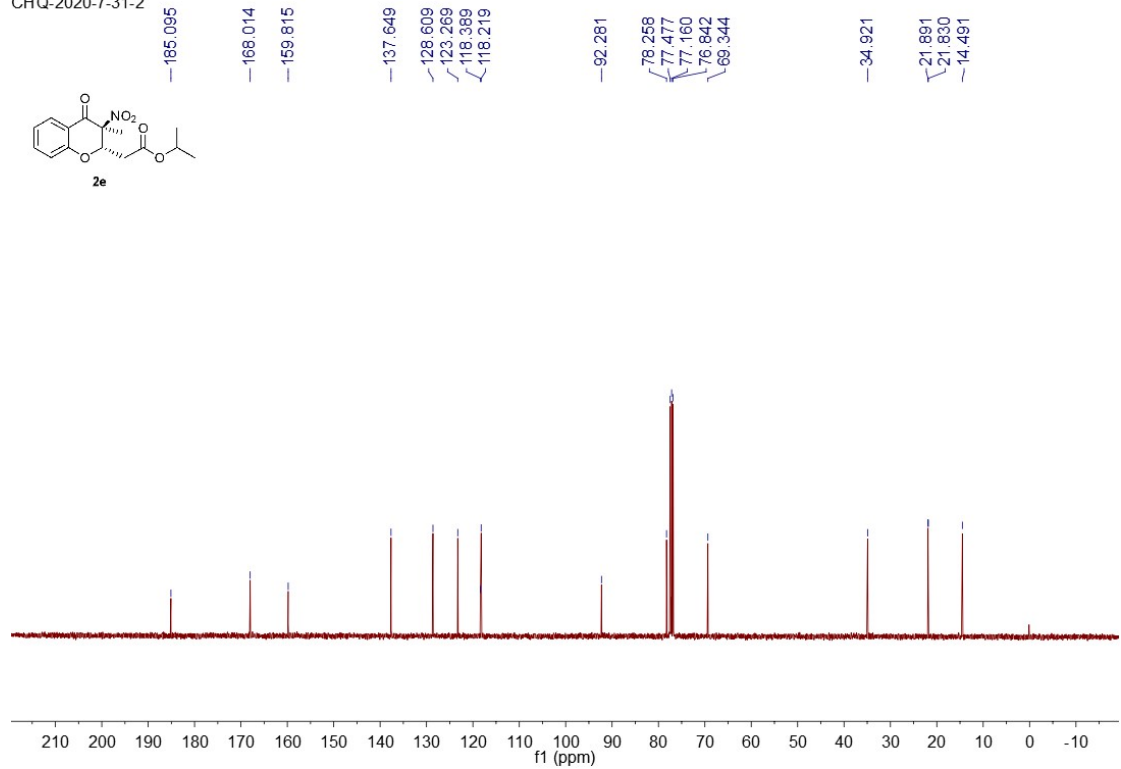



CHQ-2020-7-31-1

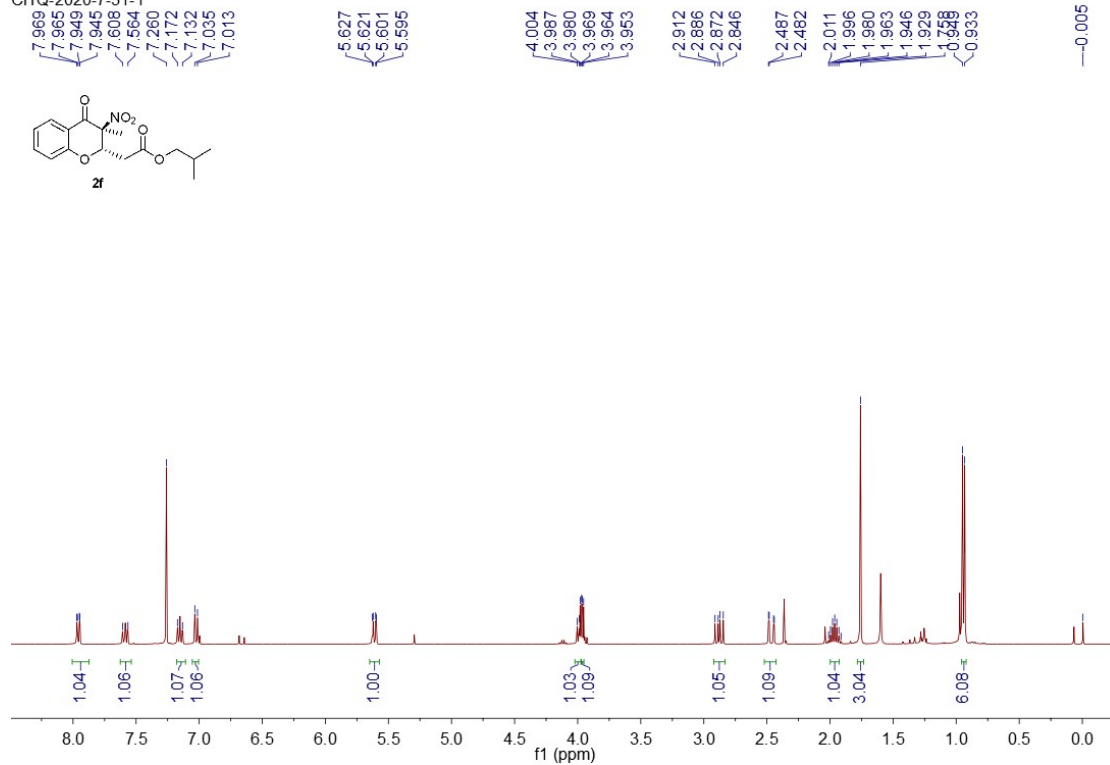

CHQ-2020-7-31-1

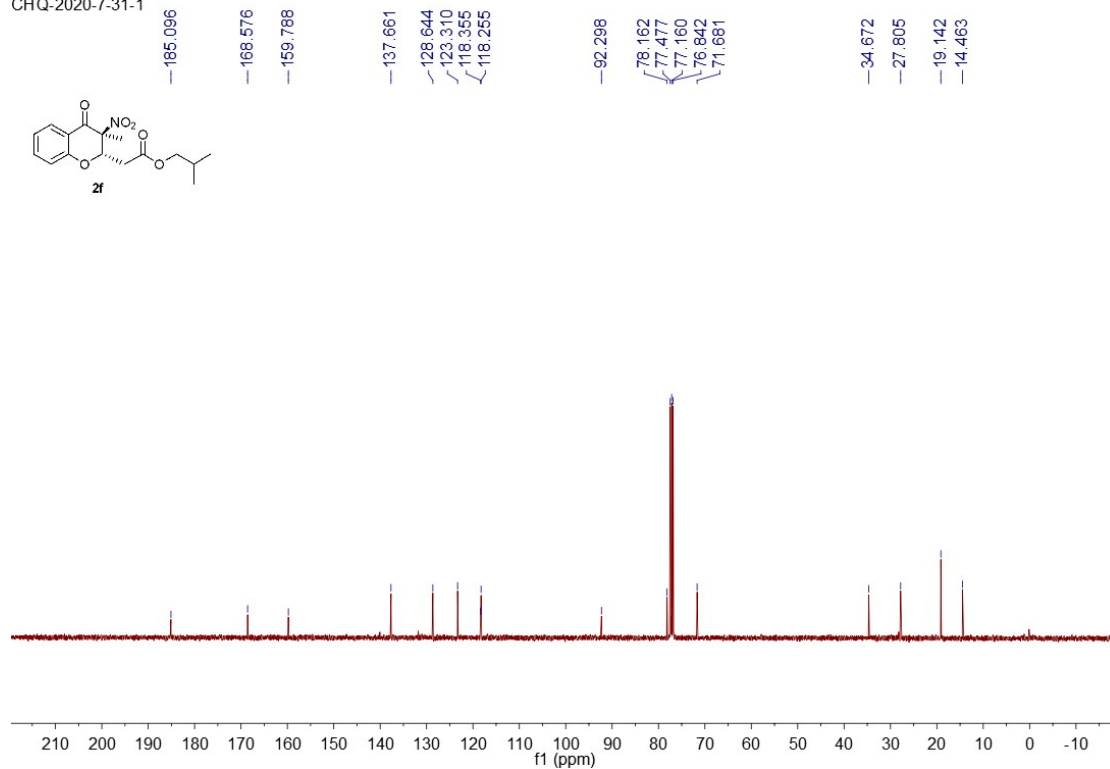

CHQ-2020-9-14-1

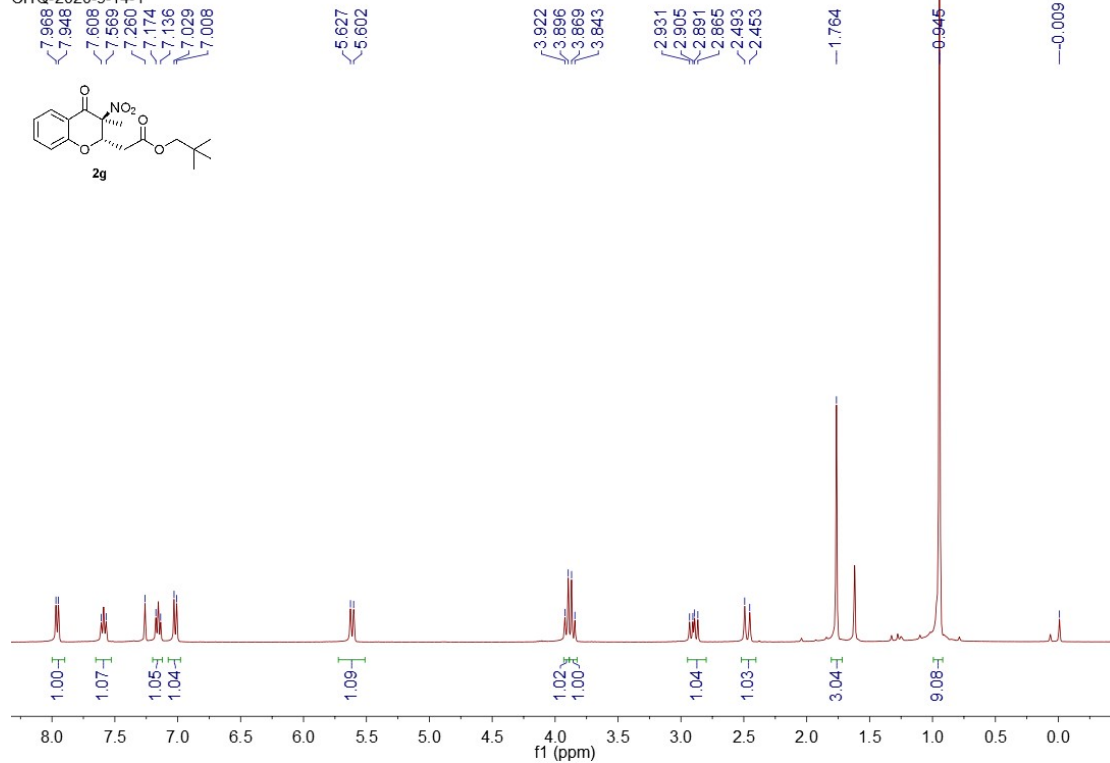

CHQ-2020-9-14-1

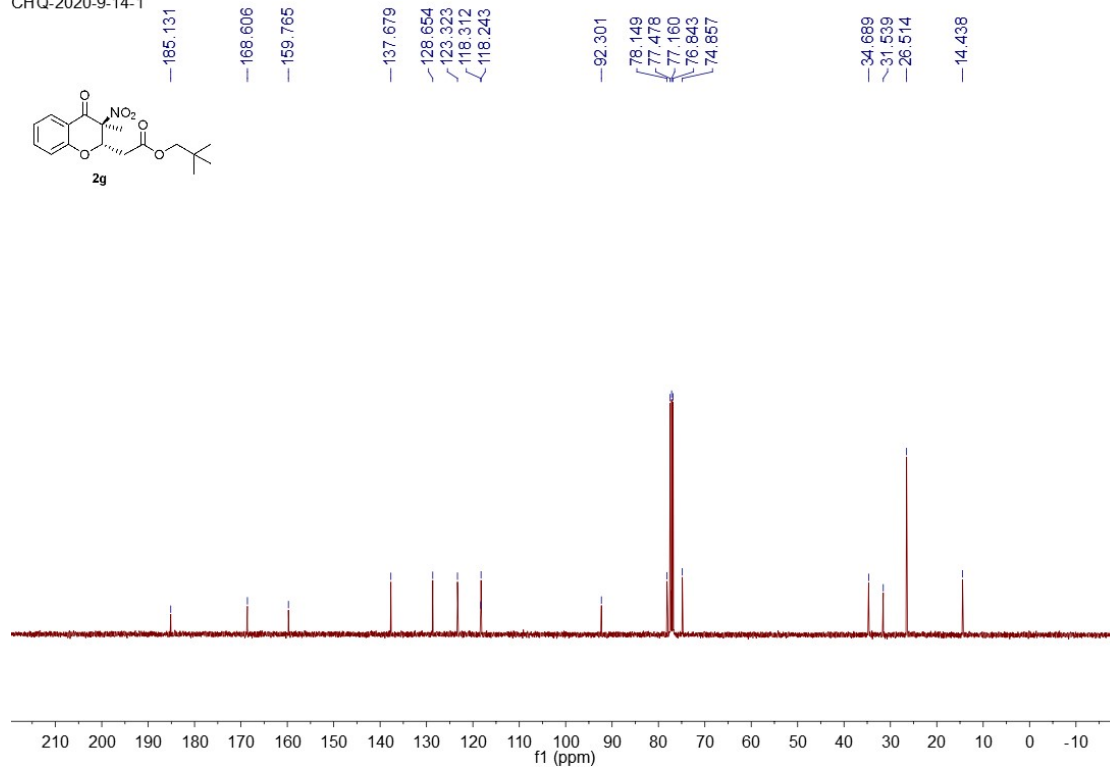

CHQ-2021-1-18-2

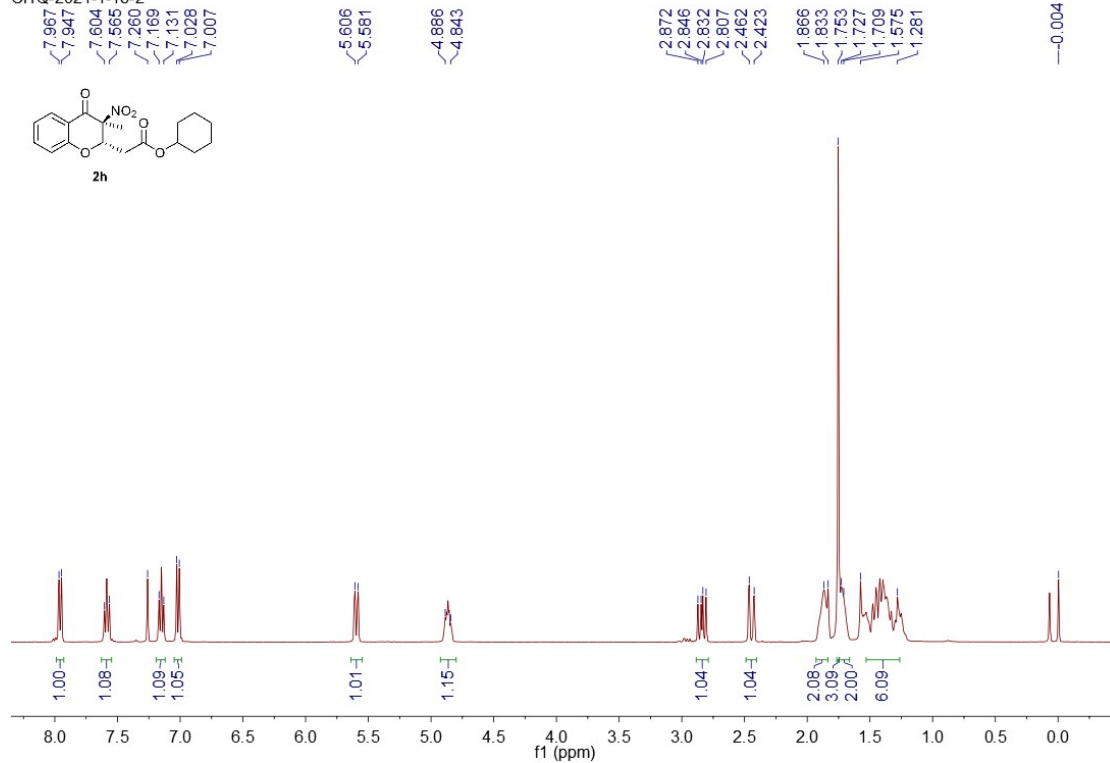

CHQ-2020-12-11-4

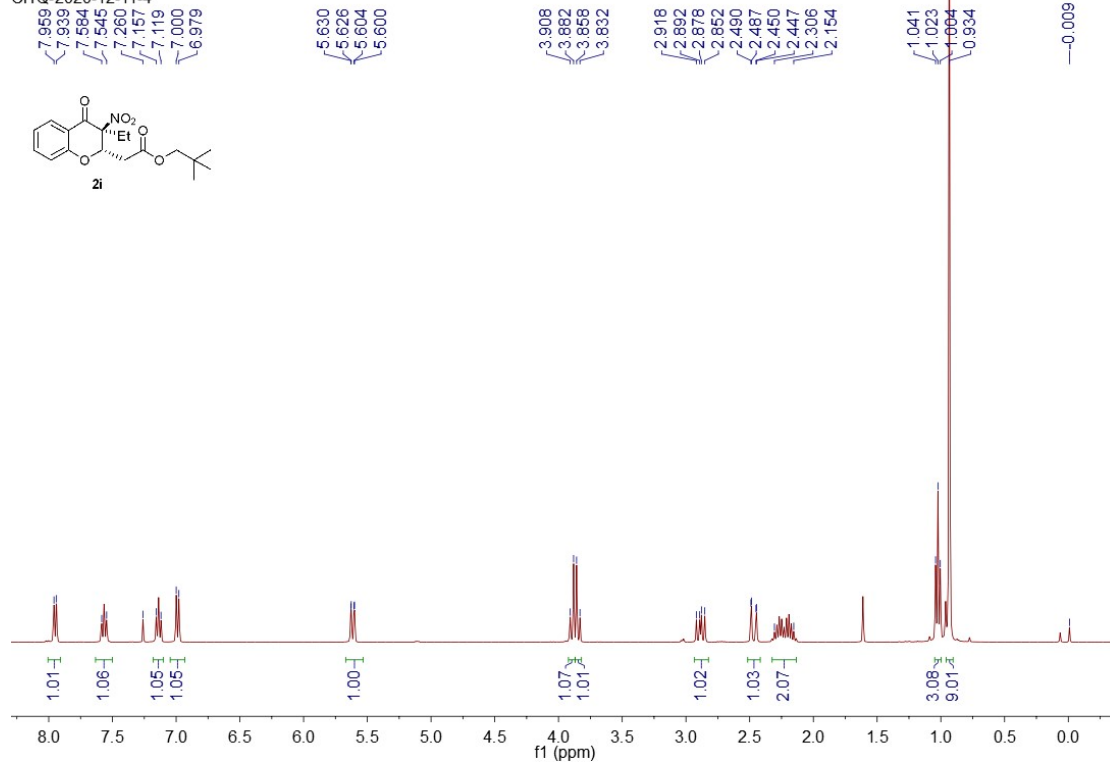

CHQ-2020-12-11-4

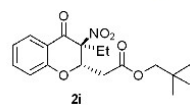

- 184.064
- 168.661
- 159.247
- 137.488
- 128.294
- 123.160
- 119.088
- 118.235
- 95.229
- 78.754
- 77.478
- 77.160
- 76.842
- 74.839
- 34.359
- 31.530
- 26.500
- 21.438
- 8.348

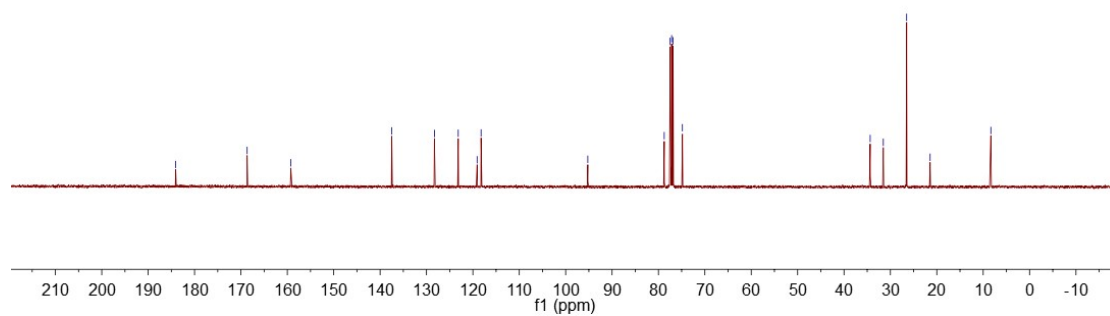

CHQ-2020-1009-2

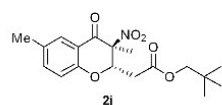

- 7.731
- 7.396
- 7.375
- 7.260
- 6.921
- 6.900
- 5.582
- 5.556
- 3.922
- 3.895
- 3.857
- 3.831
- 2.910
- 2.884
- 2.870
- 2.844
- 2.473
- 2.433
- 2.335
- 1.746
- 0.941
- 0.009

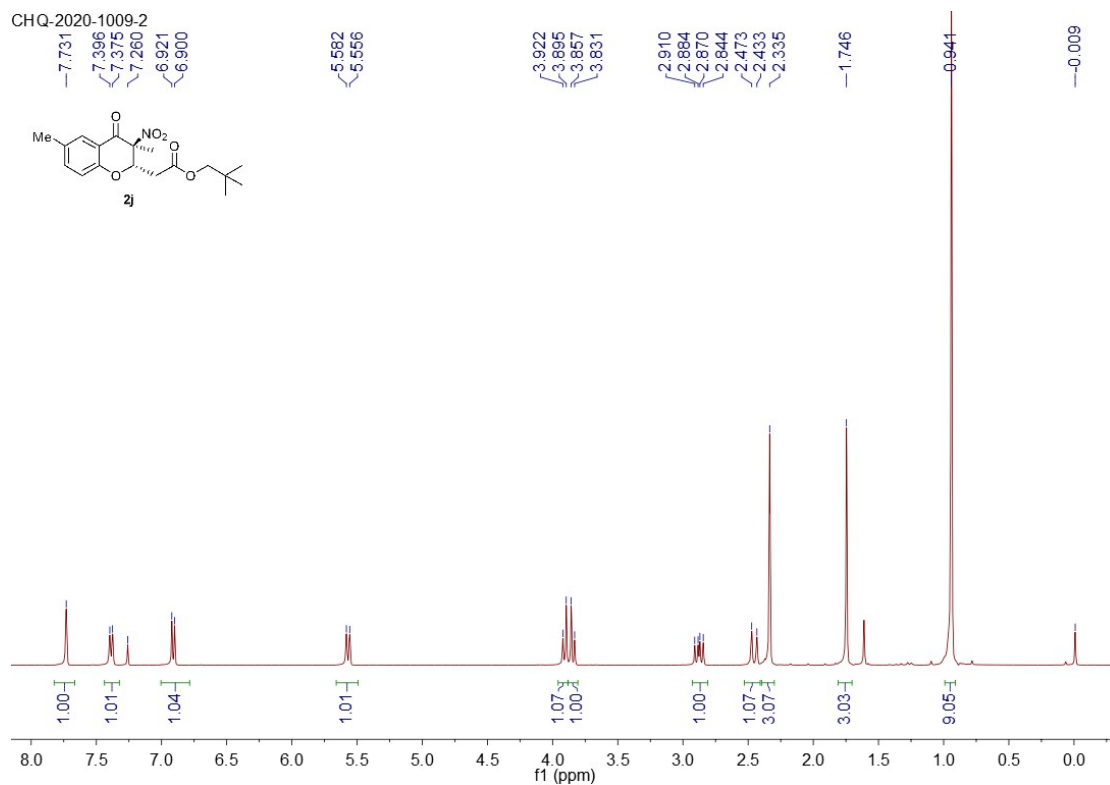

CHQ-2020-12-24-1

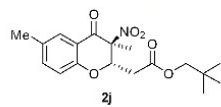

185.296  
168.643  
157.889  
138.805  
133.034  
128.069  
118.014  
117.938  
92.414  
78.145  
77.477  
77.160  
76.842  
74.814  
34.733  
31.543  
26.521  
20.591  
14.454

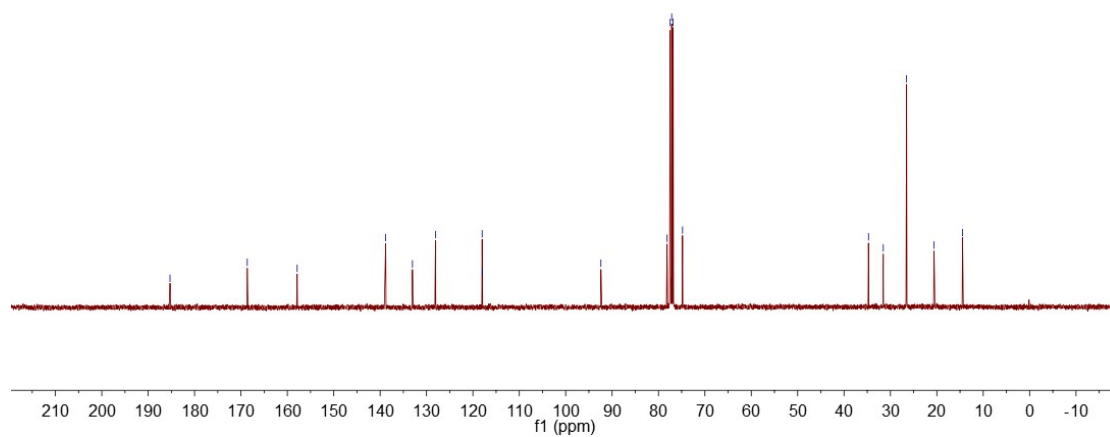

CHQ-2020-12-12-2

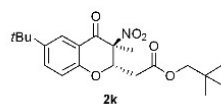

7.922  
7.917  
7.647  
7.642  
7.626  
7.620  
6.965  
6.943  
5.594  
5.590  
5.569  
5.564  
3.919  
3.893  
3.864  
3.838  
2.921  
2.885  
2.881  
2.855  
2.477  
2.473  
2.437  
2.433  
1.758  
1.342  
0.946  
-0.007

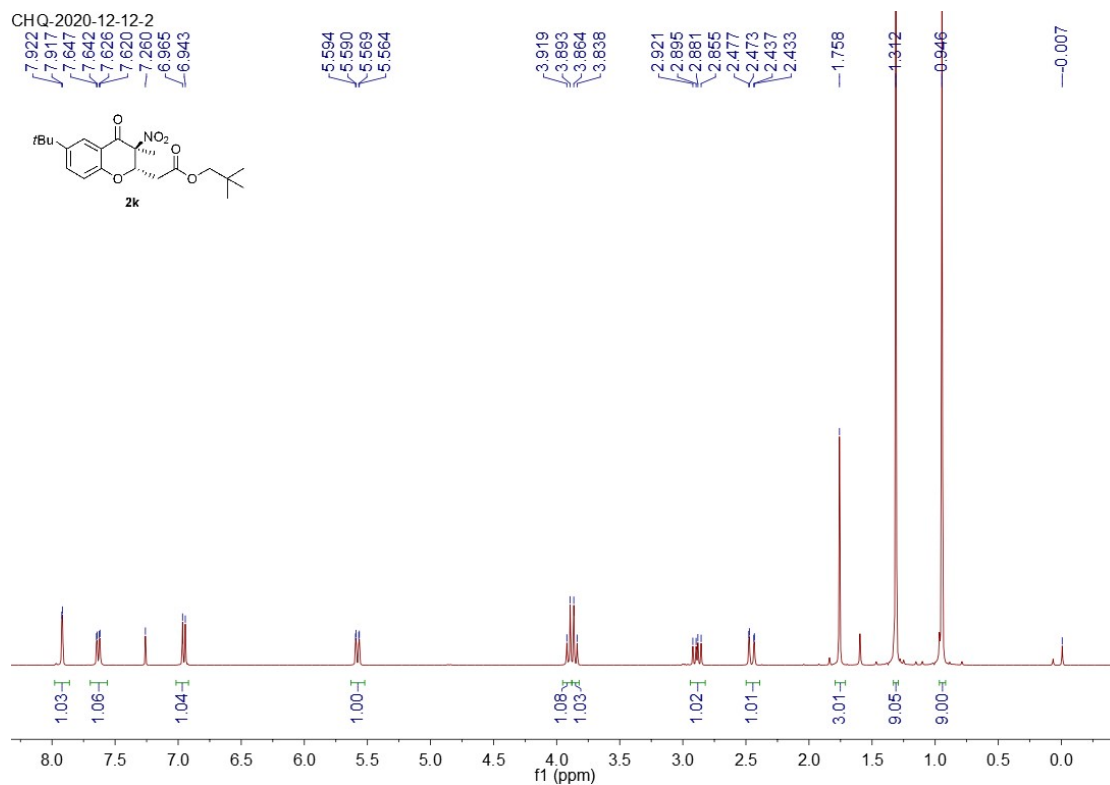

CHQ-2020-12-12-2

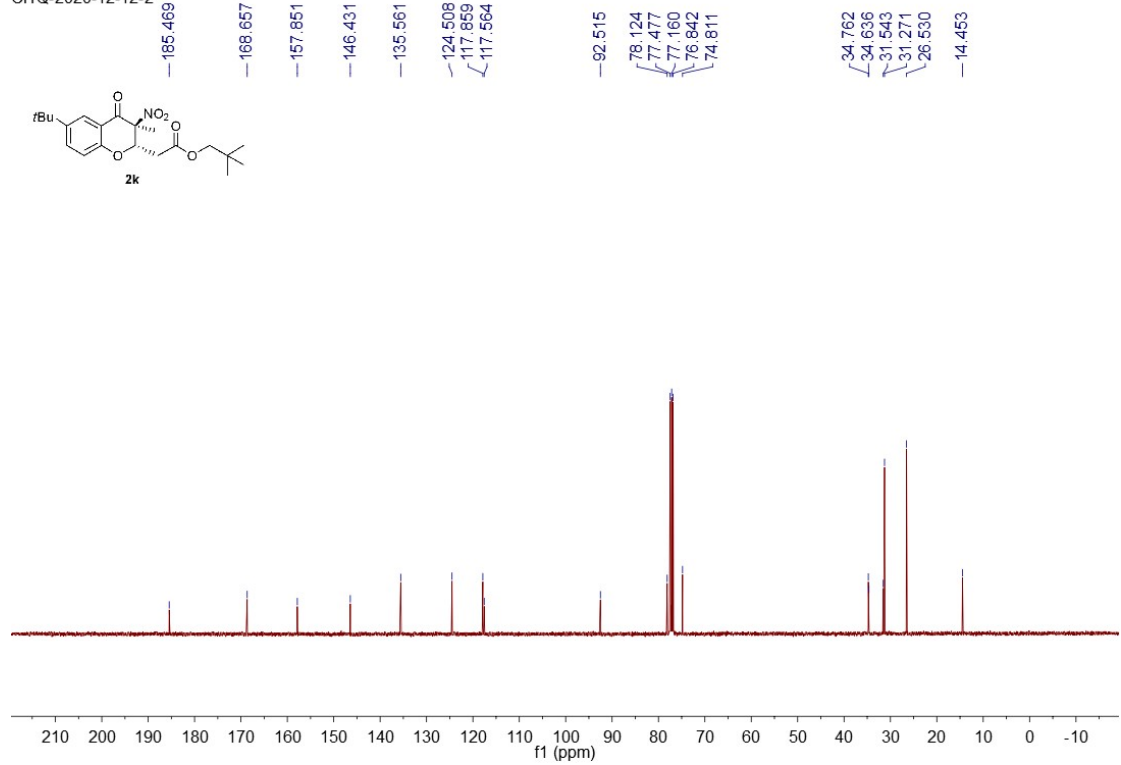

CHQ-2020-1009-4

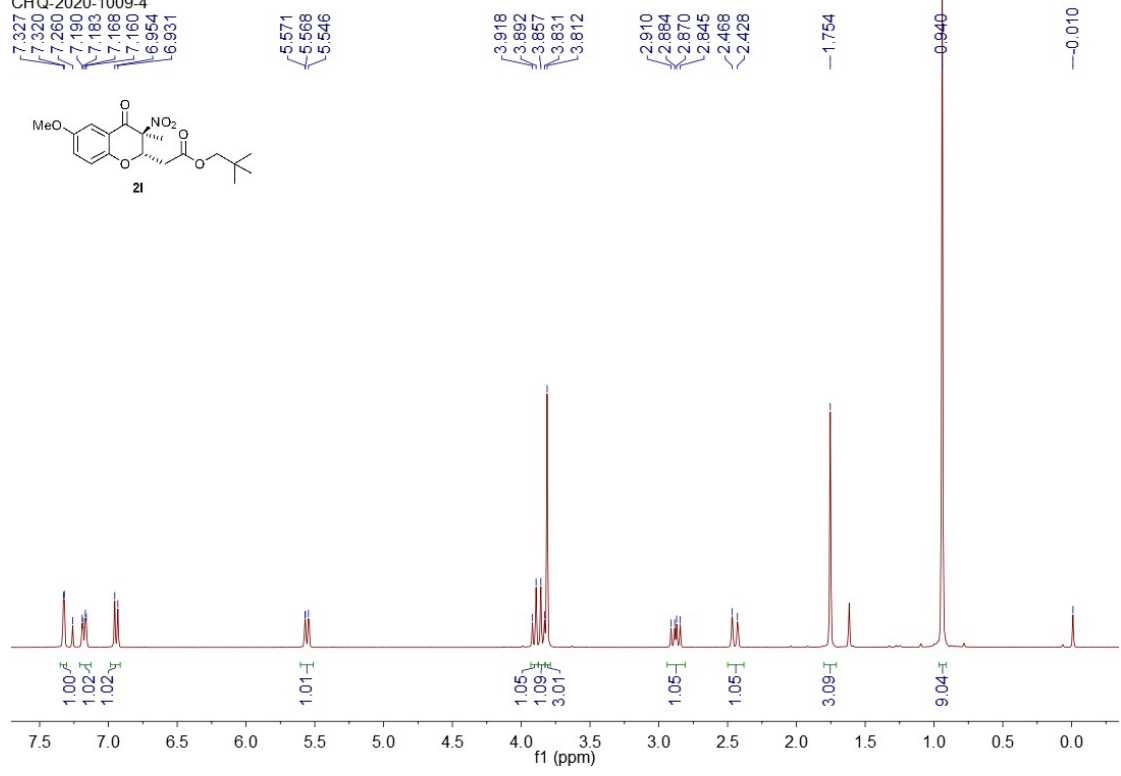

CHQ-2020-12-25-1

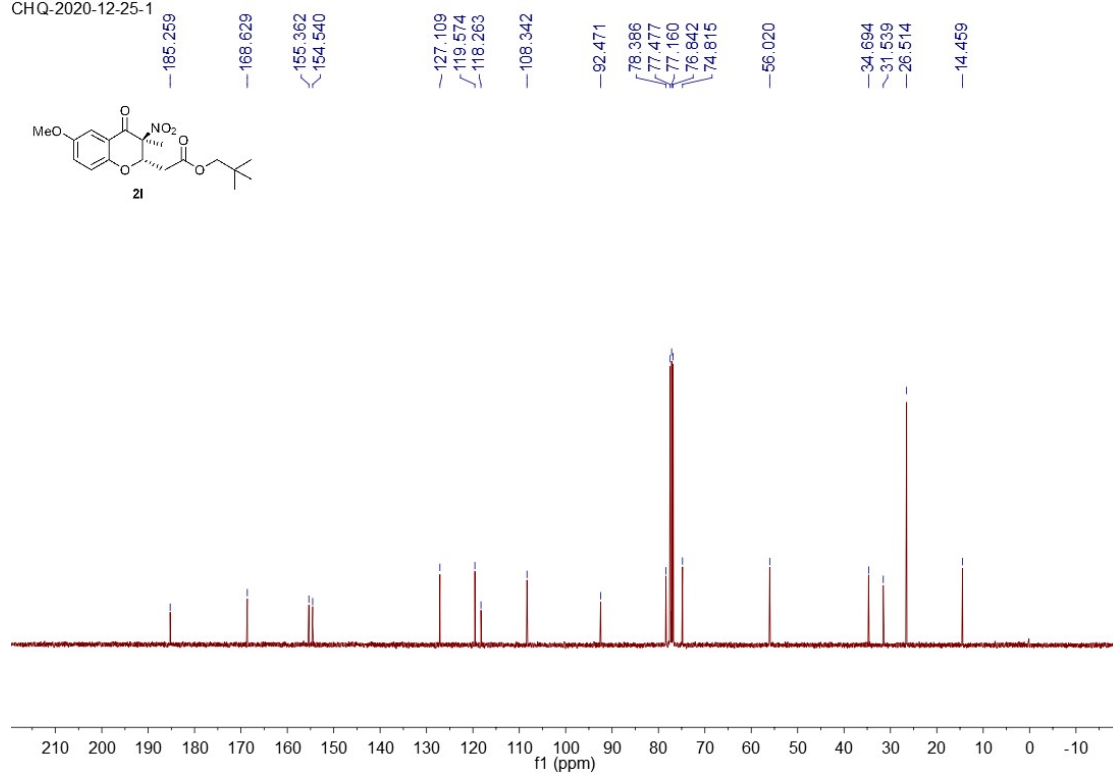

CHQ-2020-1009-3

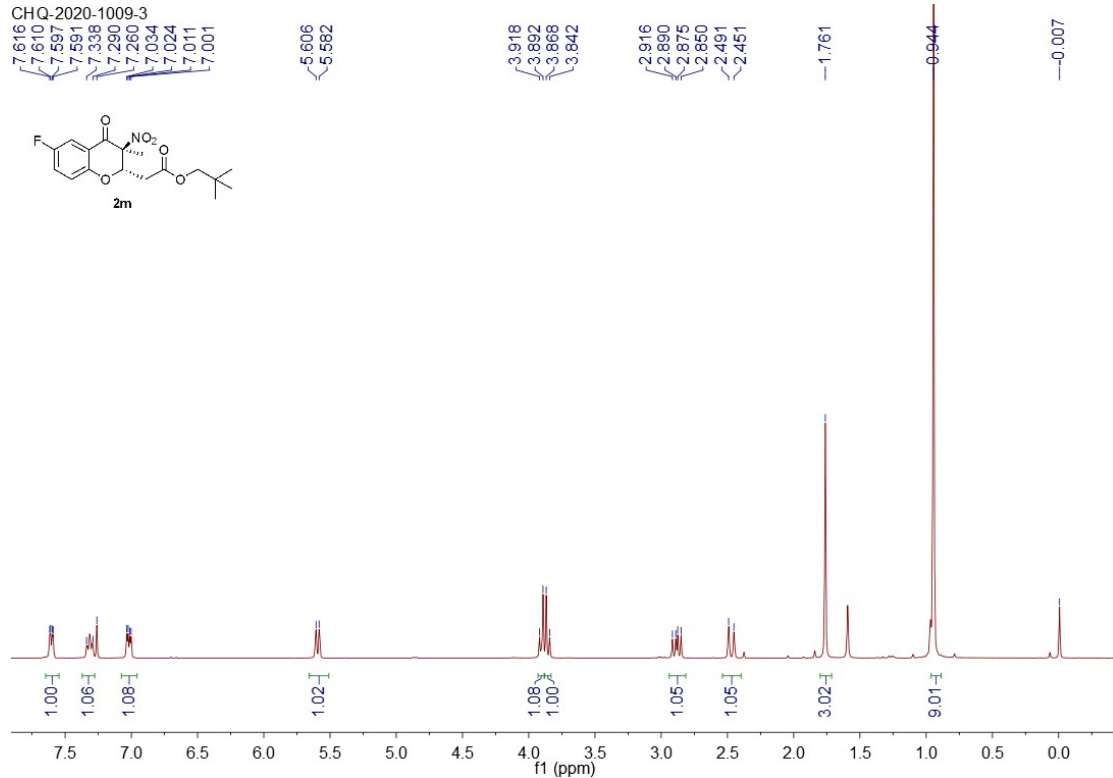

CHQ-2020-12-24-2

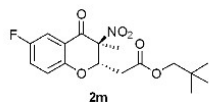

184.451

168.457

159.386

156.950

156.025

156.009

125.548

125.302

120.179

120.104

119.052

118.982

113.670

113.432

92.068

78.569

77.478

77.160

76.842

74.924

34.536

31.539

26.514

14.488

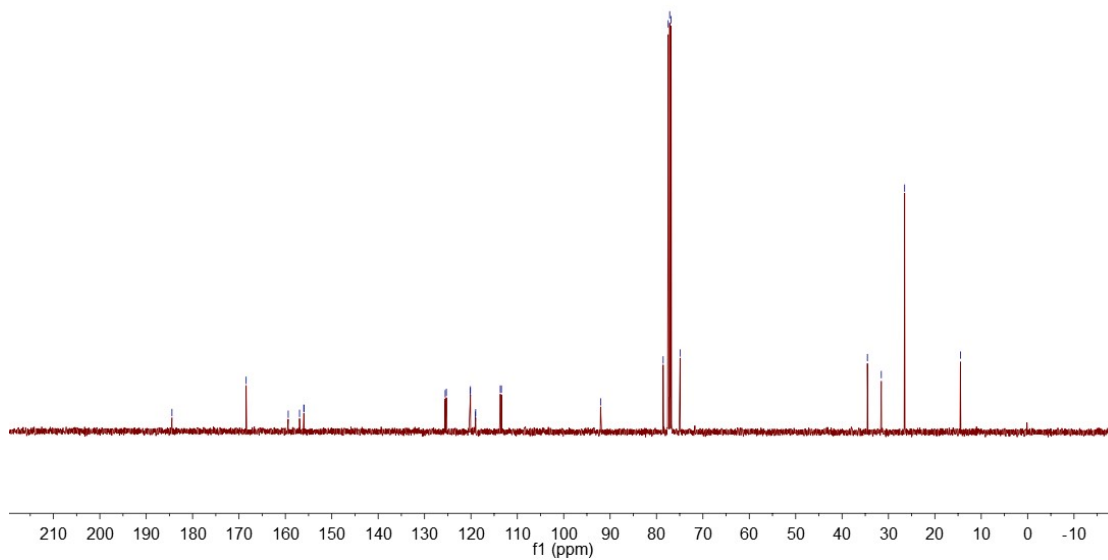

CHQ-2020-12-24-2

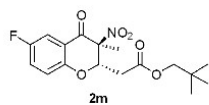

118.302

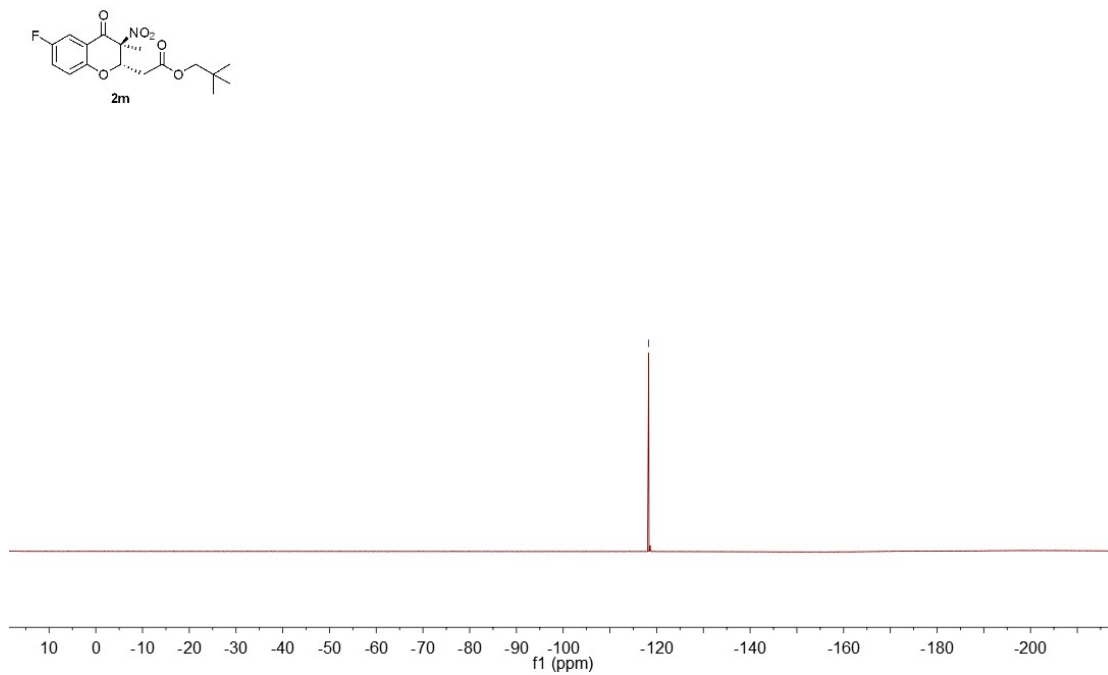



CHQ-2020-10-19-1

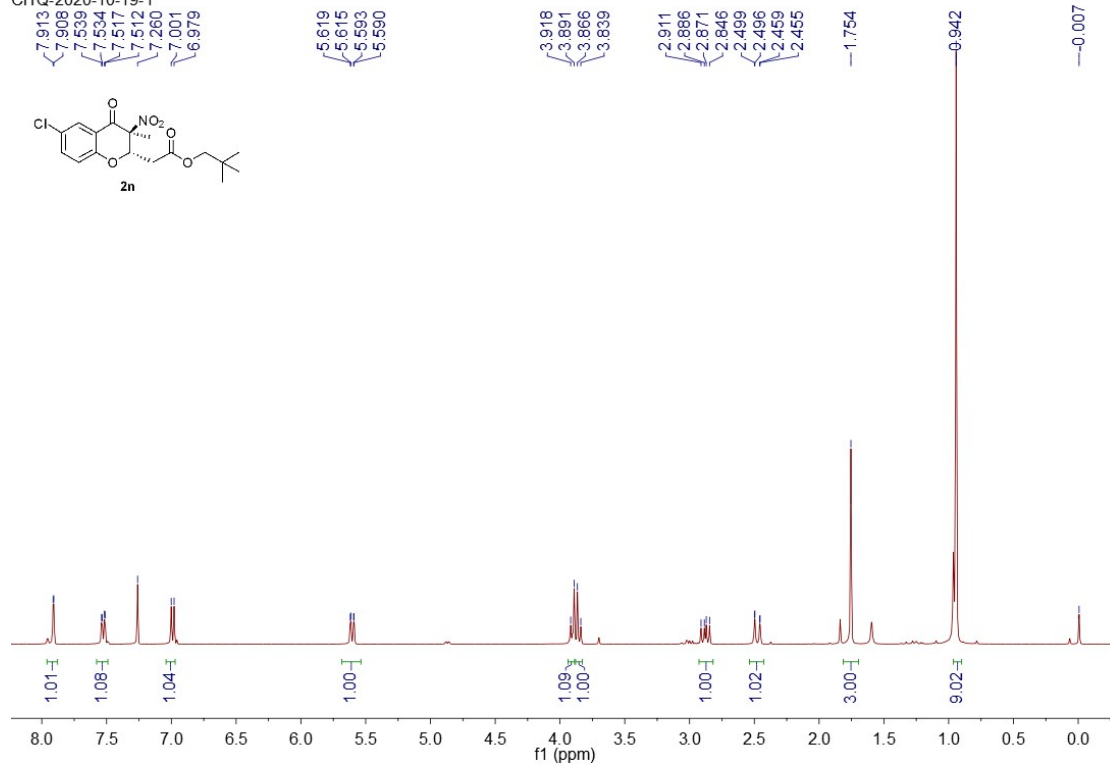

CHQ-2020-12-25-1

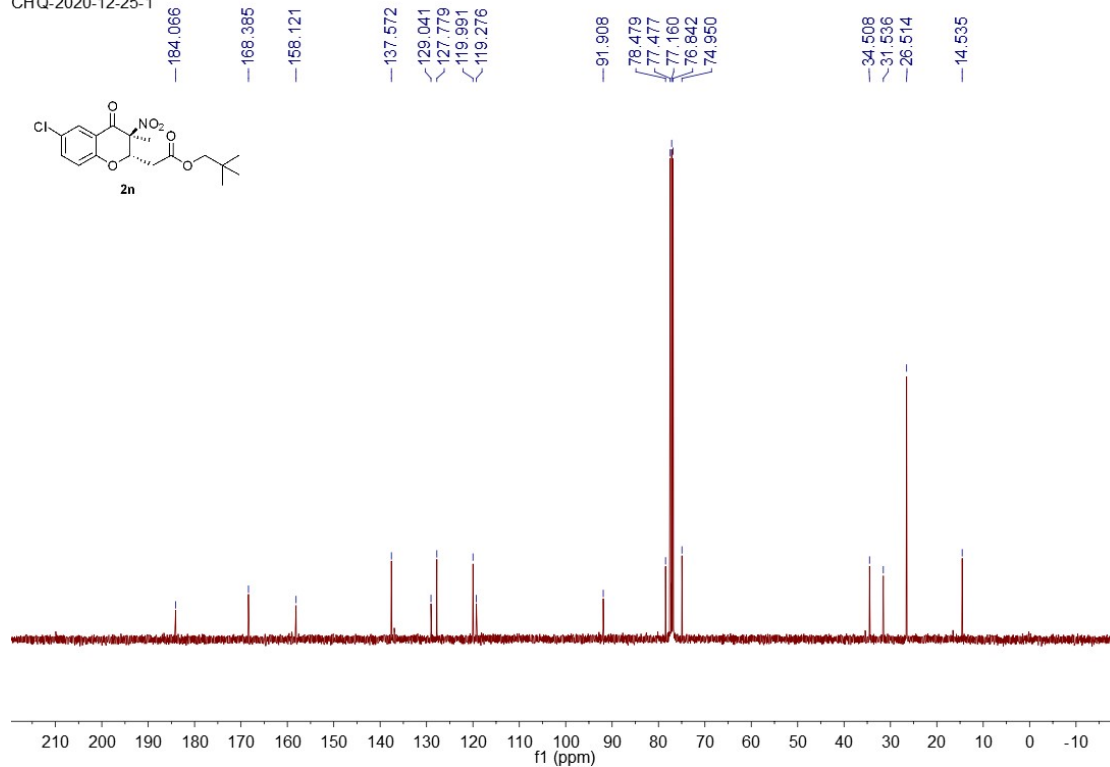

CHQ-2020-10-19-2

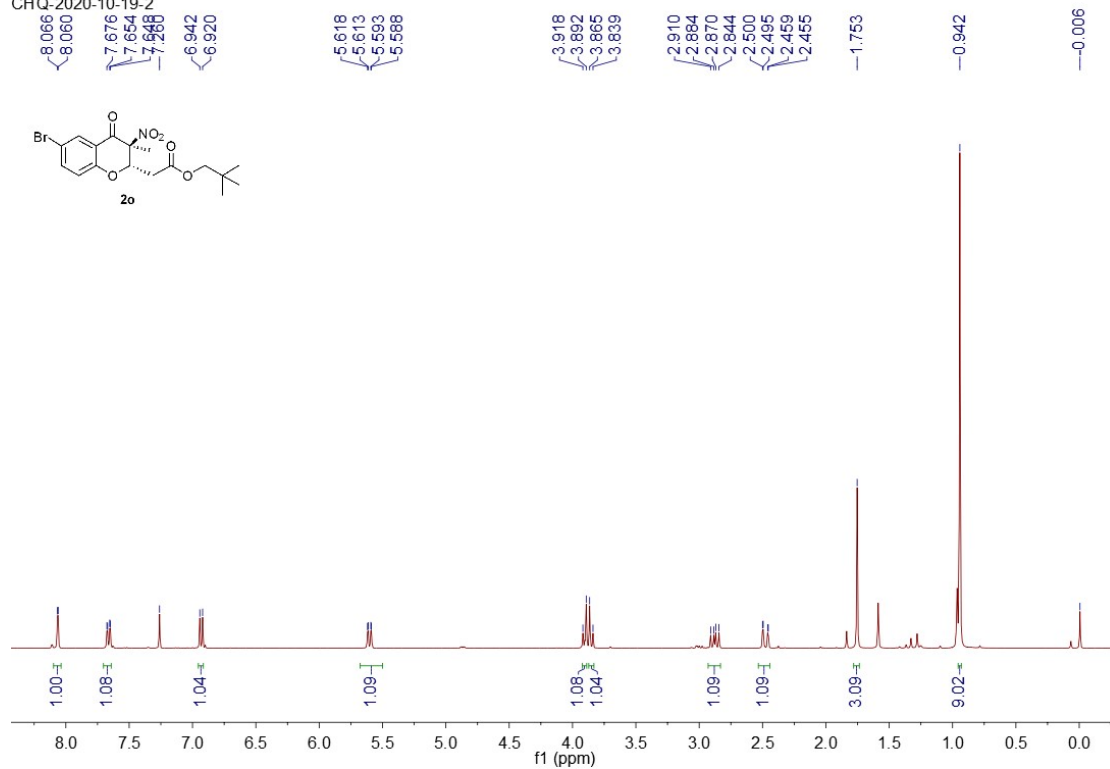

CHQ-2020-12-25-2

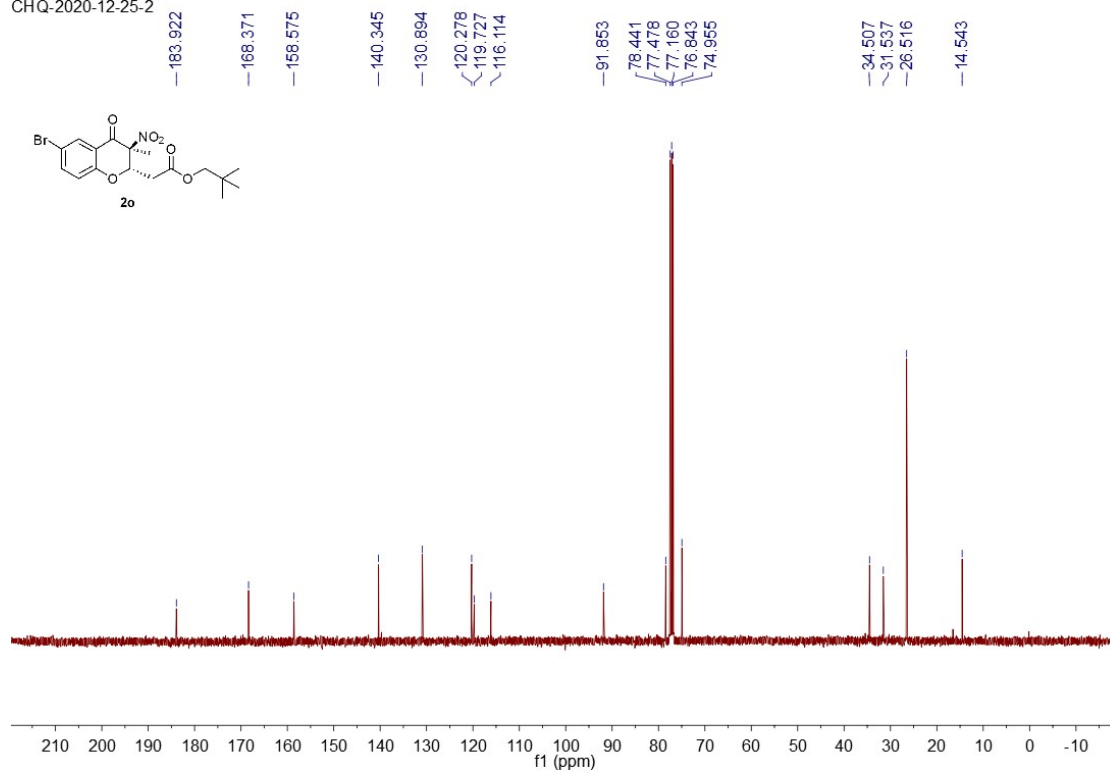

CHQ-2020-12-11-3

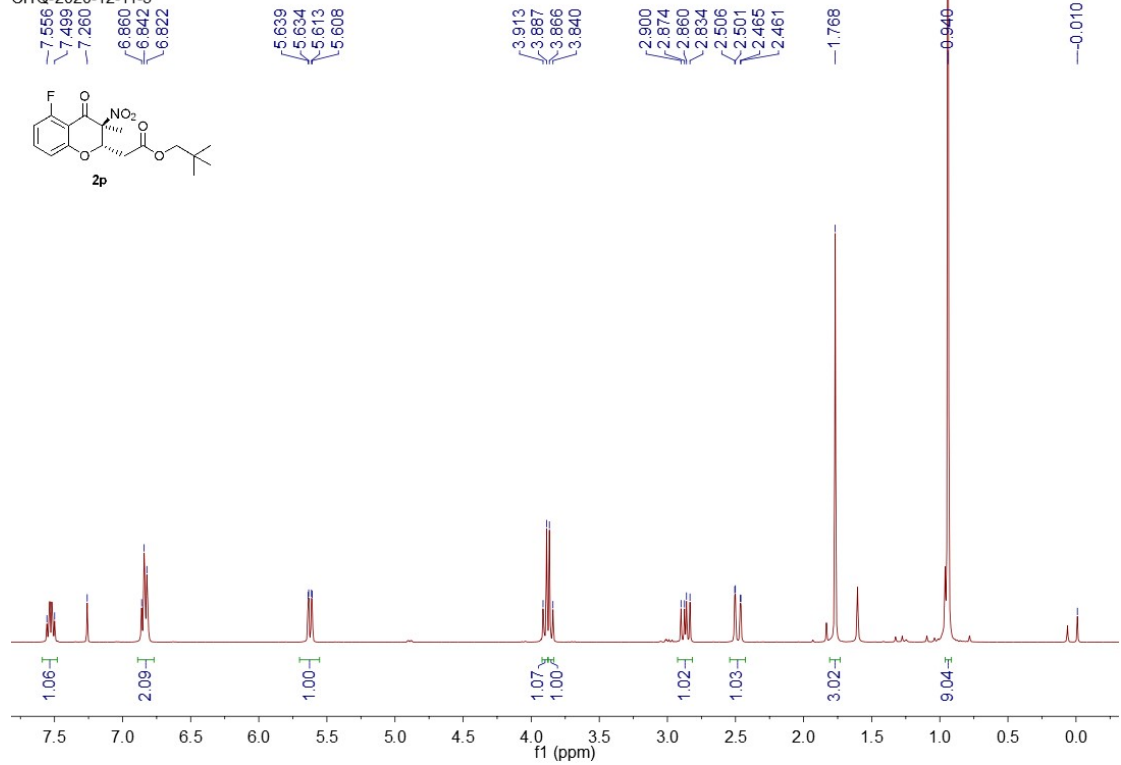

CHQ-2020-12-11-3

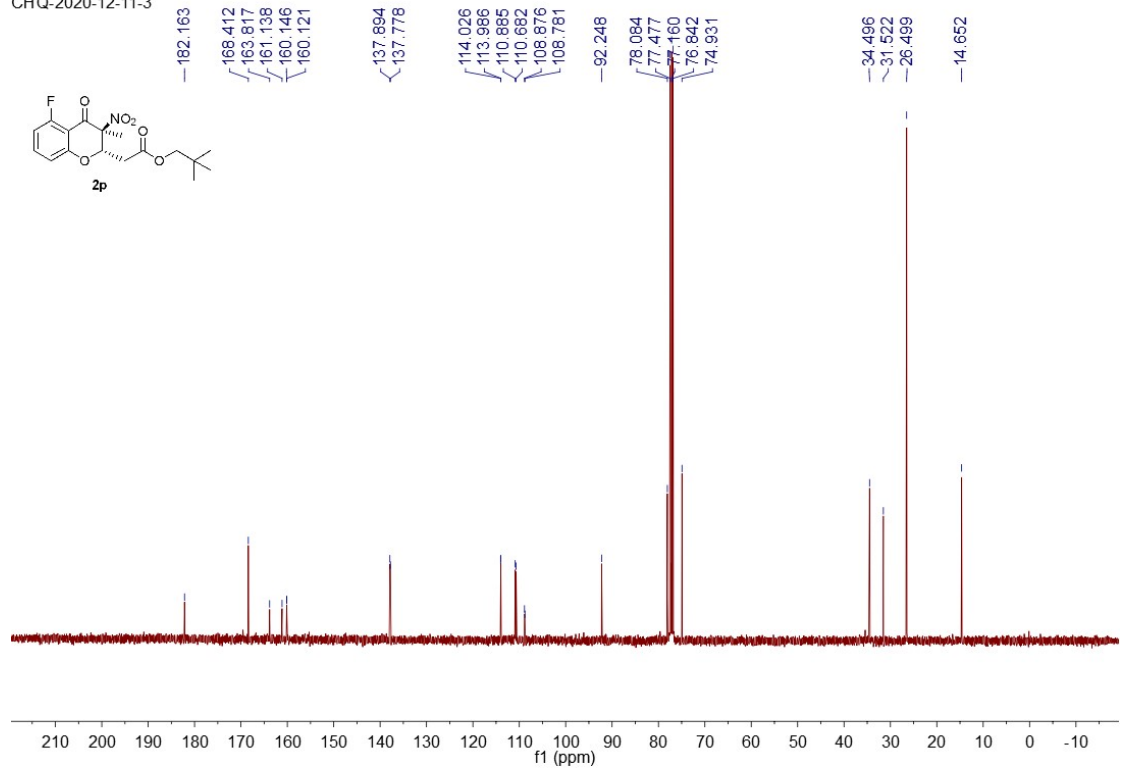

CHQ-2020-12-26-3

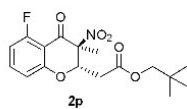

--107.742

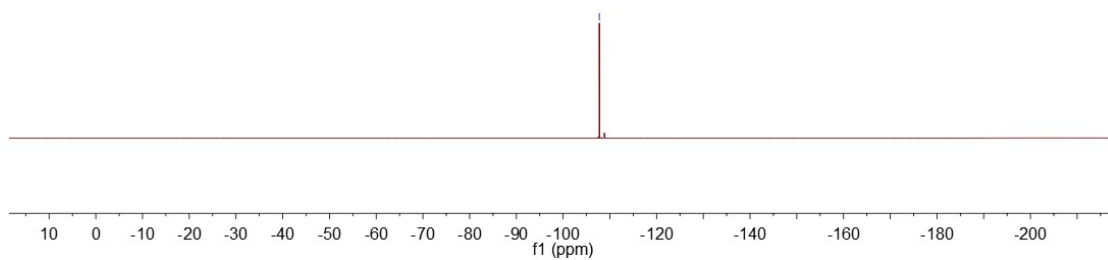

CHQ-2020-12-17-1

7.456  
7.418  
7.260  
7.187  
7.168  
6.957  
6.936

5.641  
5.616

3.913  
3.887  
3.866  
3.839

2.866  
2.860  
2.845  
2.820  
2.512  
2.472

-1.770

-0.940

-0.008

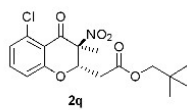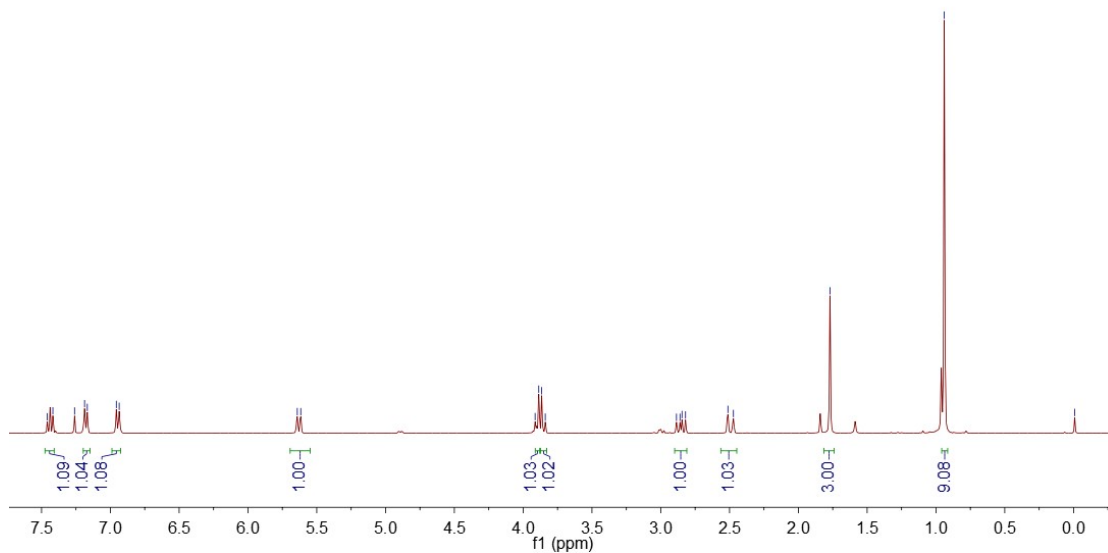

CHQ-2020-12-17-1

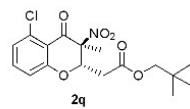

182.742  
168.424  
160.973  
136.374  
136.207  
126.534  
117.248  
115.923  
92.295  
77.668  
77.478  
77.160  
76.843  
74.927  
34.527  
31.522  
26.507  
14.821

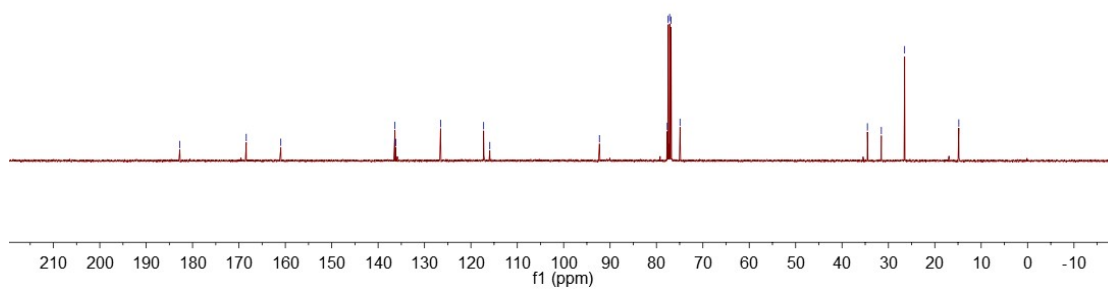

CHQ-2020-12-15-2

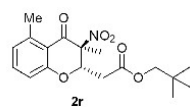

7.430  
7.391  
7.260  
6.939  
6.921  
6.874  
6.853  
5.602  
5.598  
5.576  
5.572  
3.921  
3.895  
3.865  
3.839  
2.899  
2.873  
2.859  
2.833  
2.645  
2.487  
2.483  
2.447  
2.443  
1.753  
0.945  
0.006

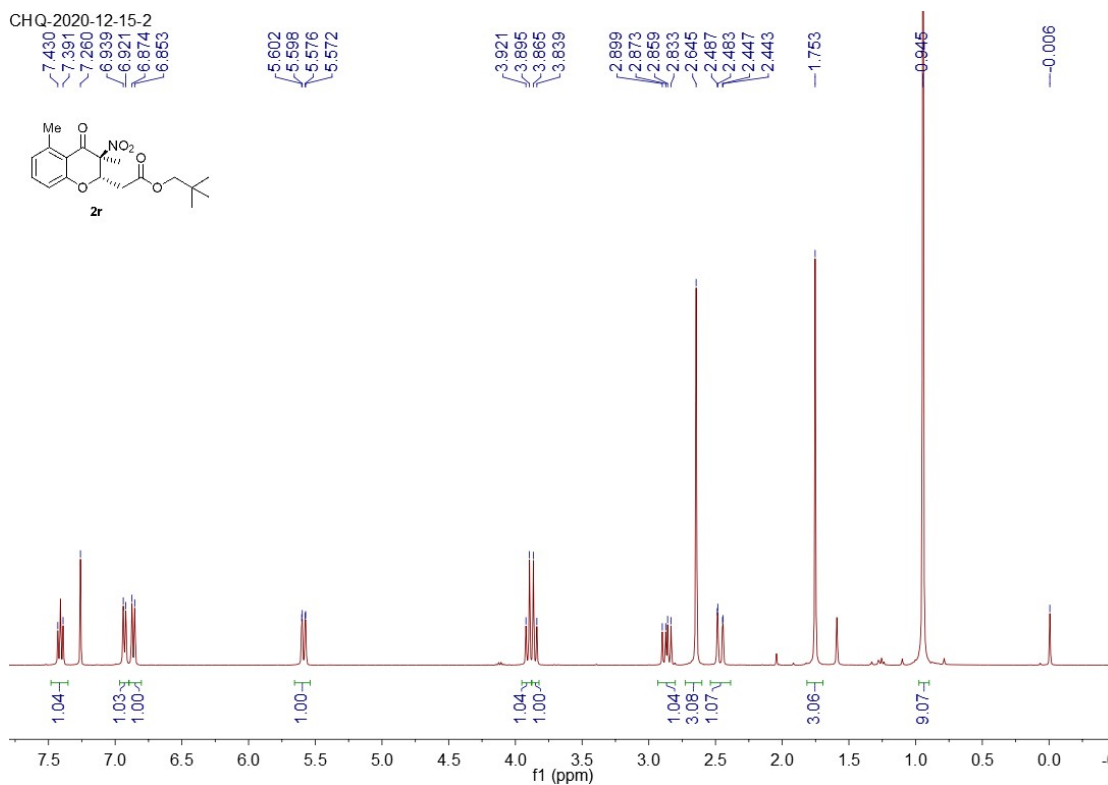

CHQ-2020-12-15-2

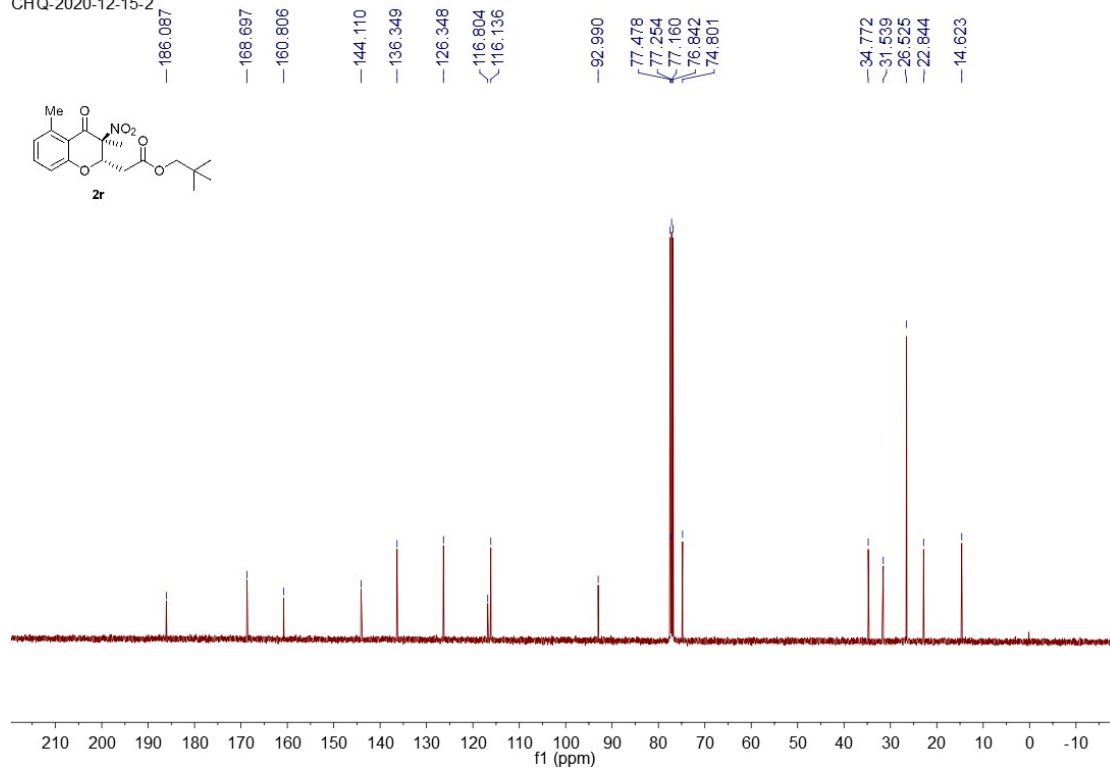

CHQ-2020-12-12-3

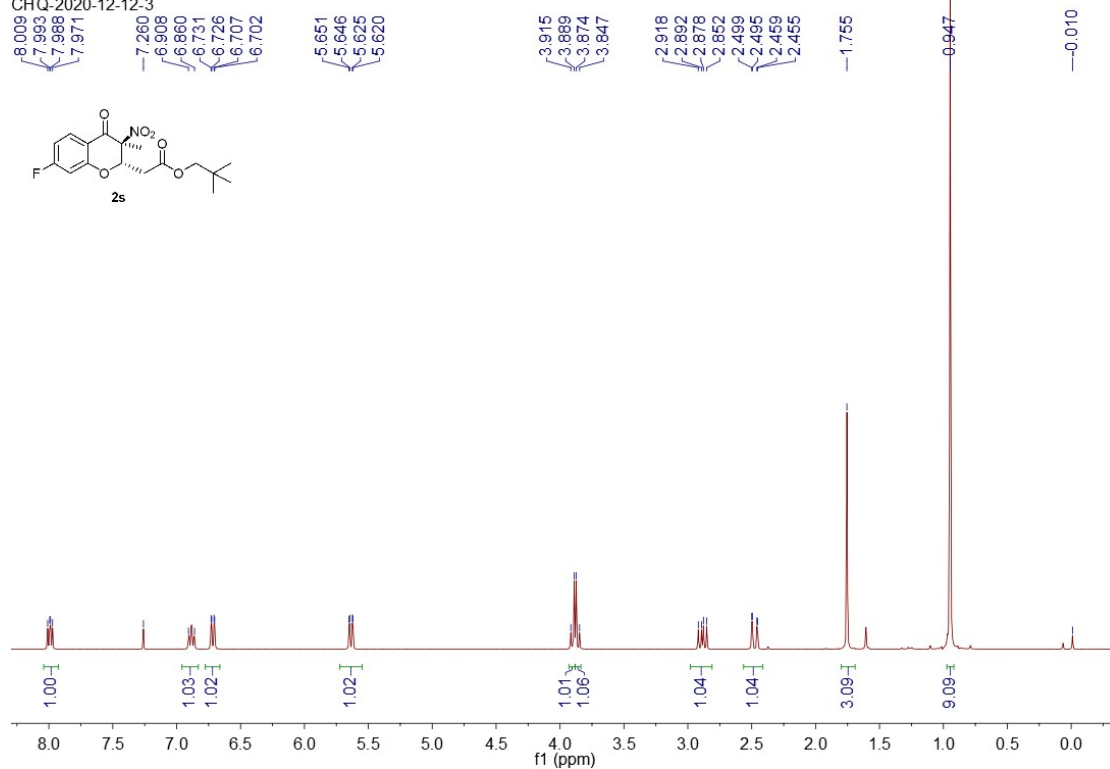

CHQ-2020-12-12-3

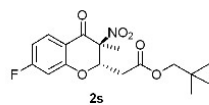

183.739  
169.680  
168.395  
167.095  
161.500  
161.362

131.393  
131.278

115.250  
115.226  
112.191  
111.962  
105.459  
105.210

91.915

78.693  
77.478  
77.160  
76.842  
74.940

34.551  
31.523  
26.498

14.552

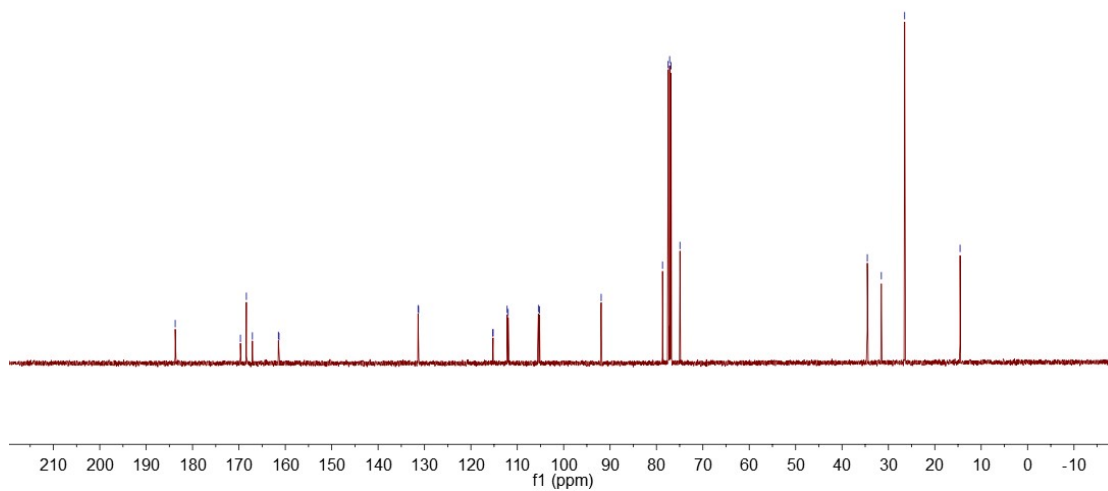

CHQ-2020-12-12-3



96.569

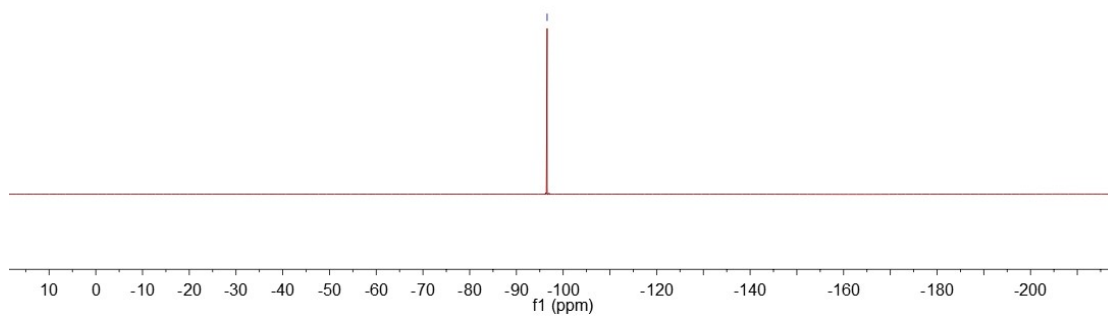

CHQ-2020-12-18-1

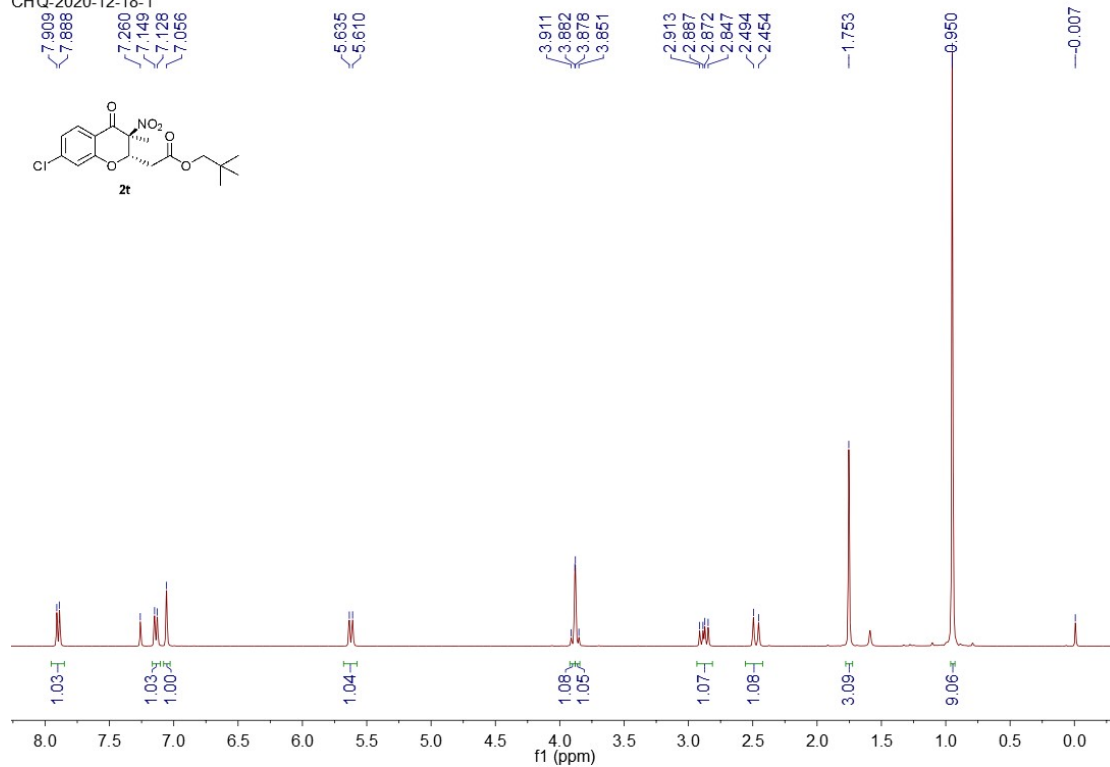

CHQ-2020-12-18-1

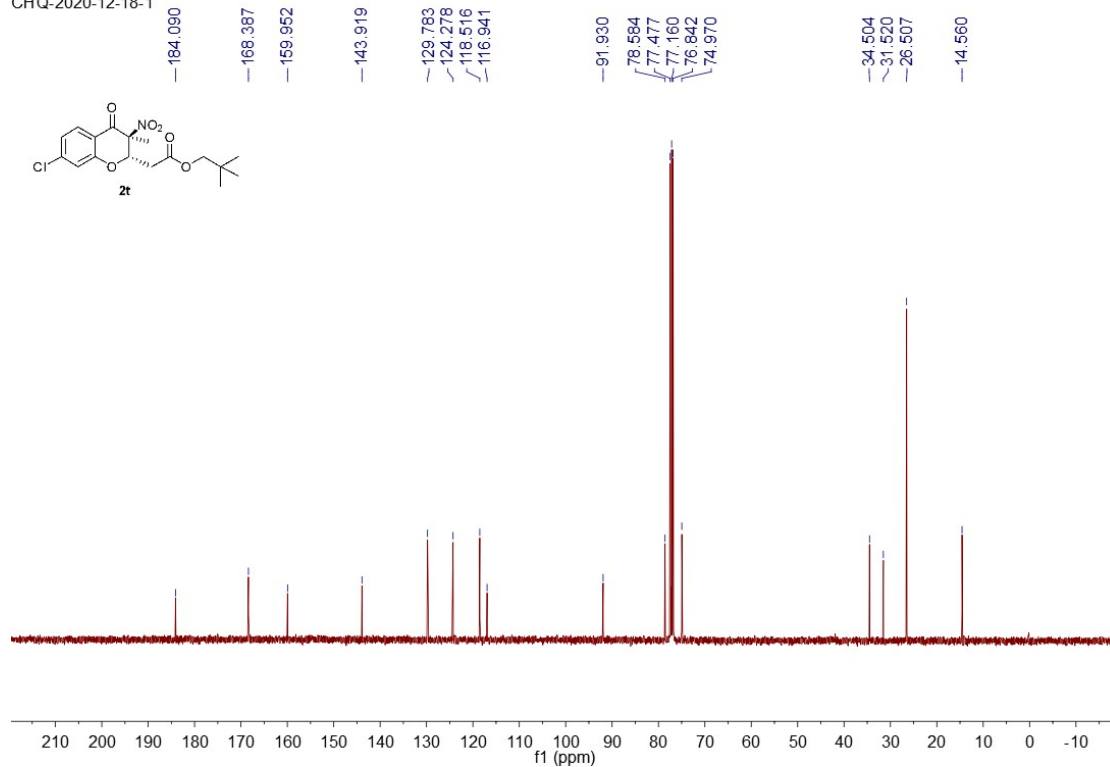



CHQ-2020-12-15-3

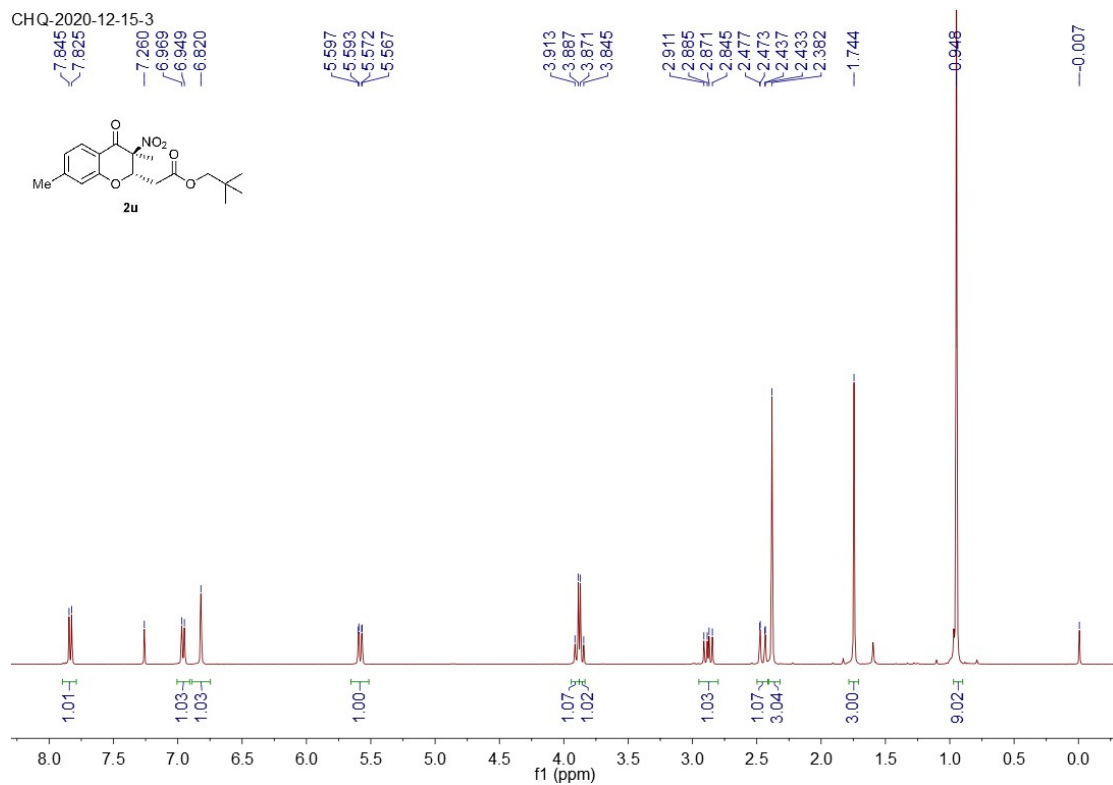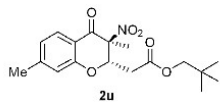

CHQ-2020-12-15-3

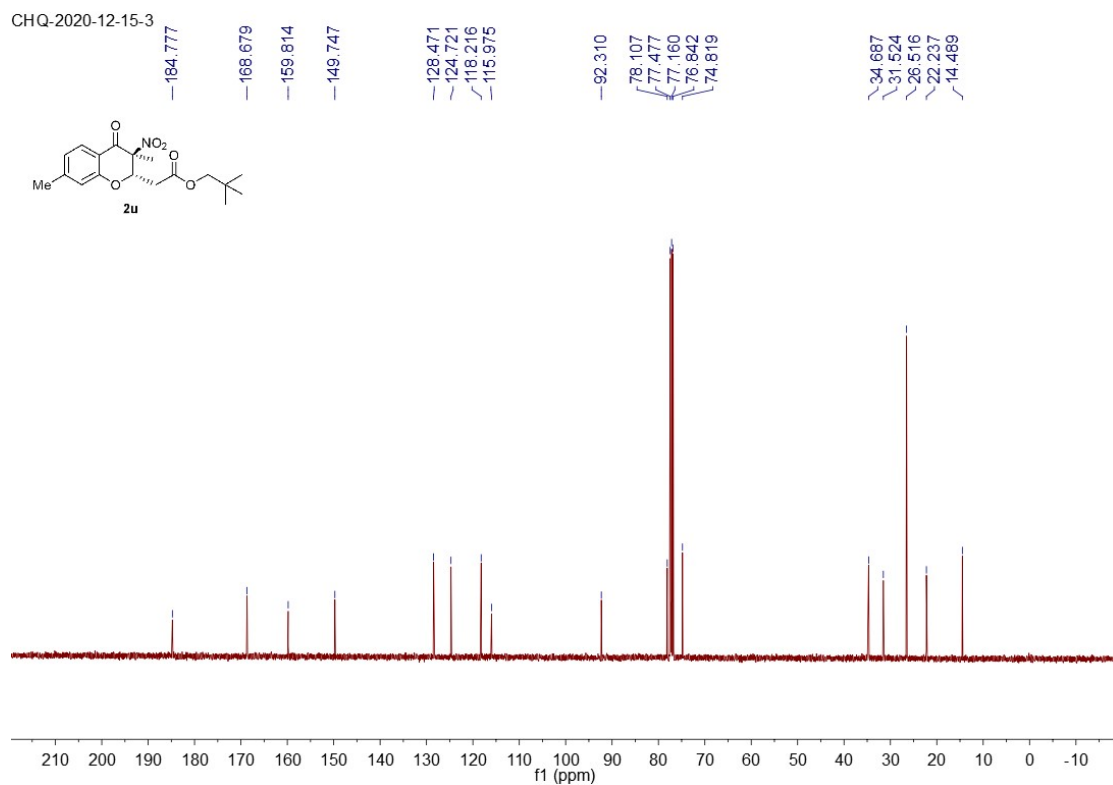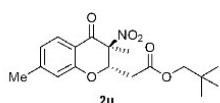

CHQ-2020-12-15-1

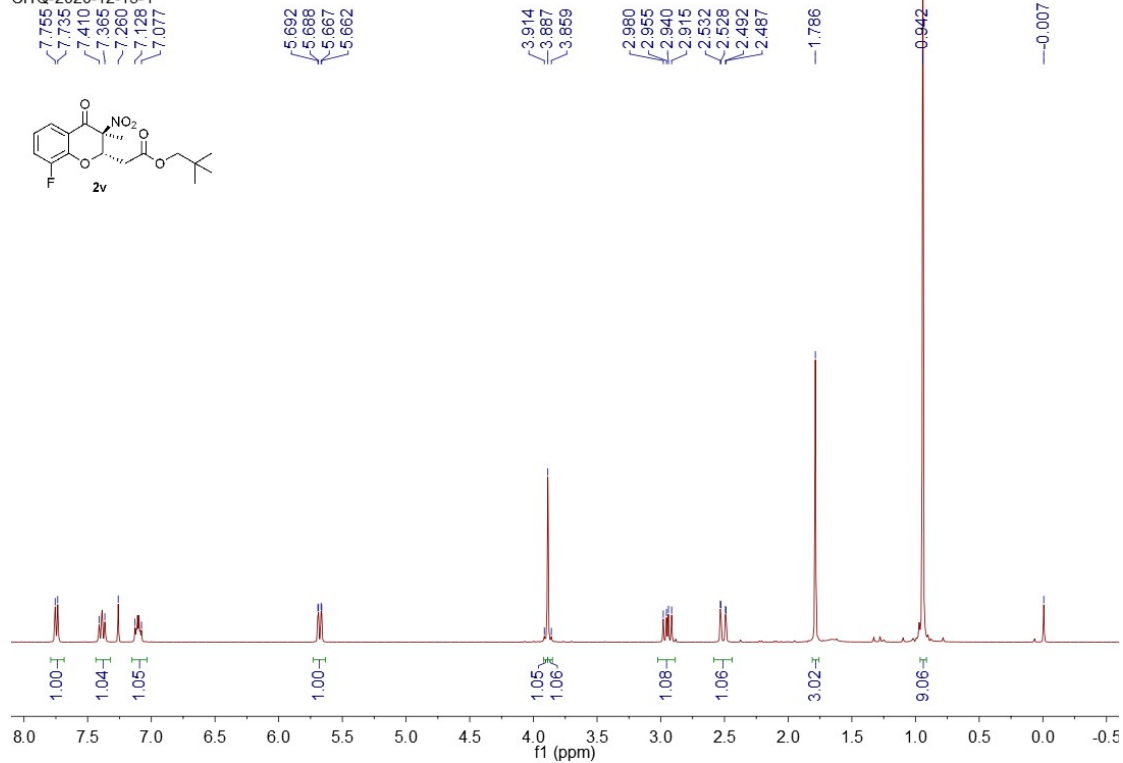

CHQ-2020-12-15-1

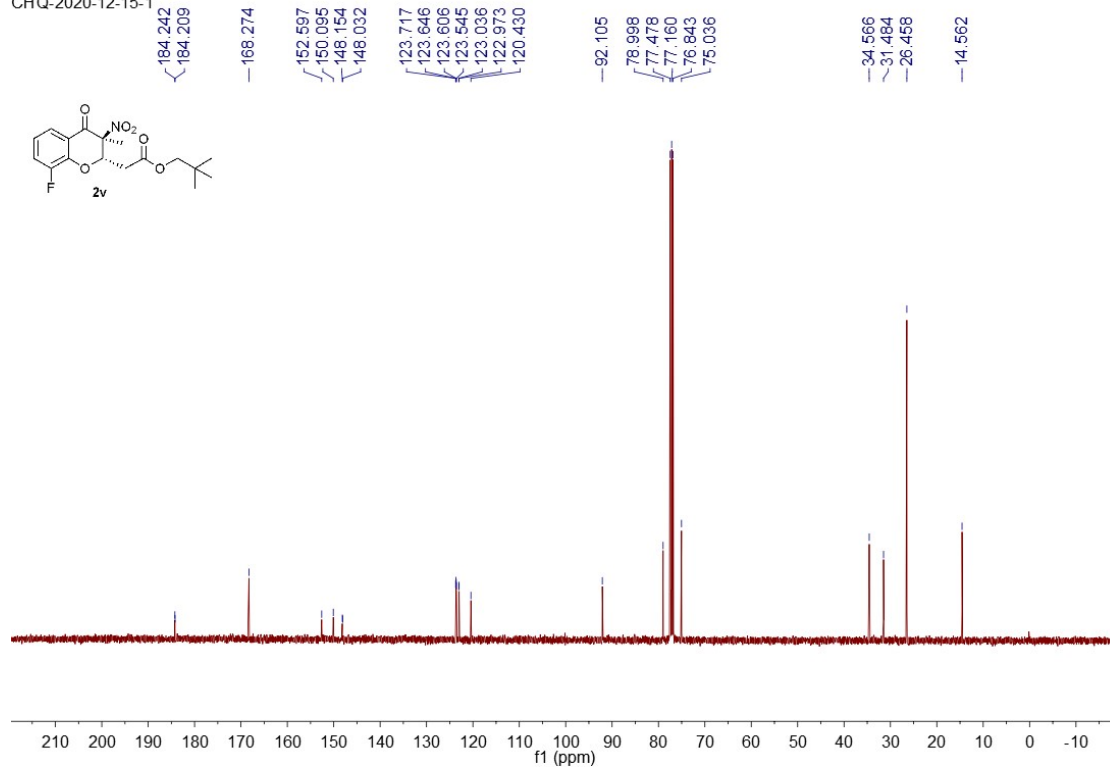

CHQ-2020-12-15-1

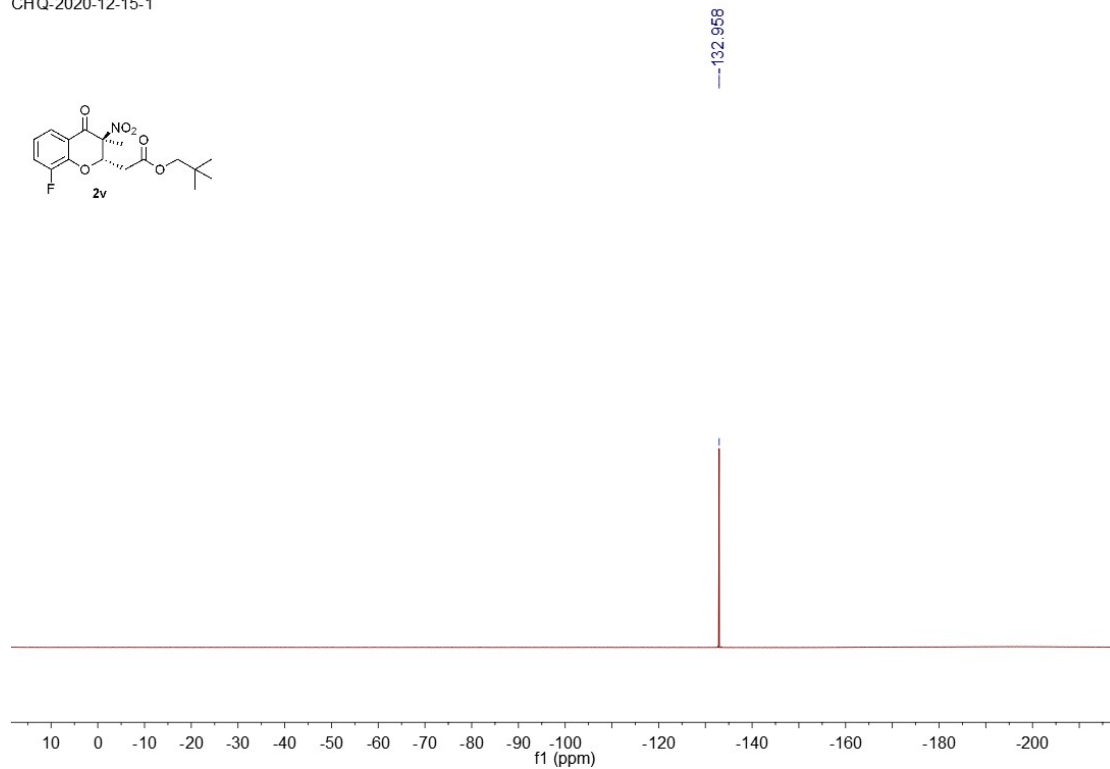

CHQ-2020-12-18-2

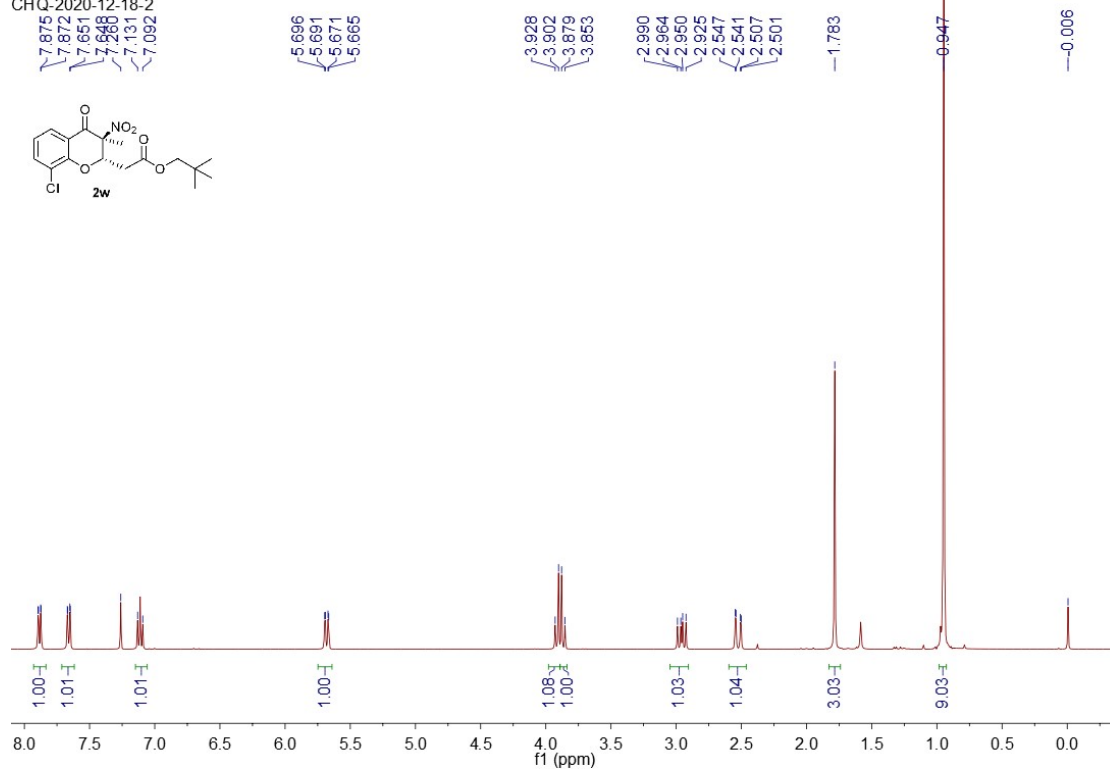

CHQ-2020-12-18-2

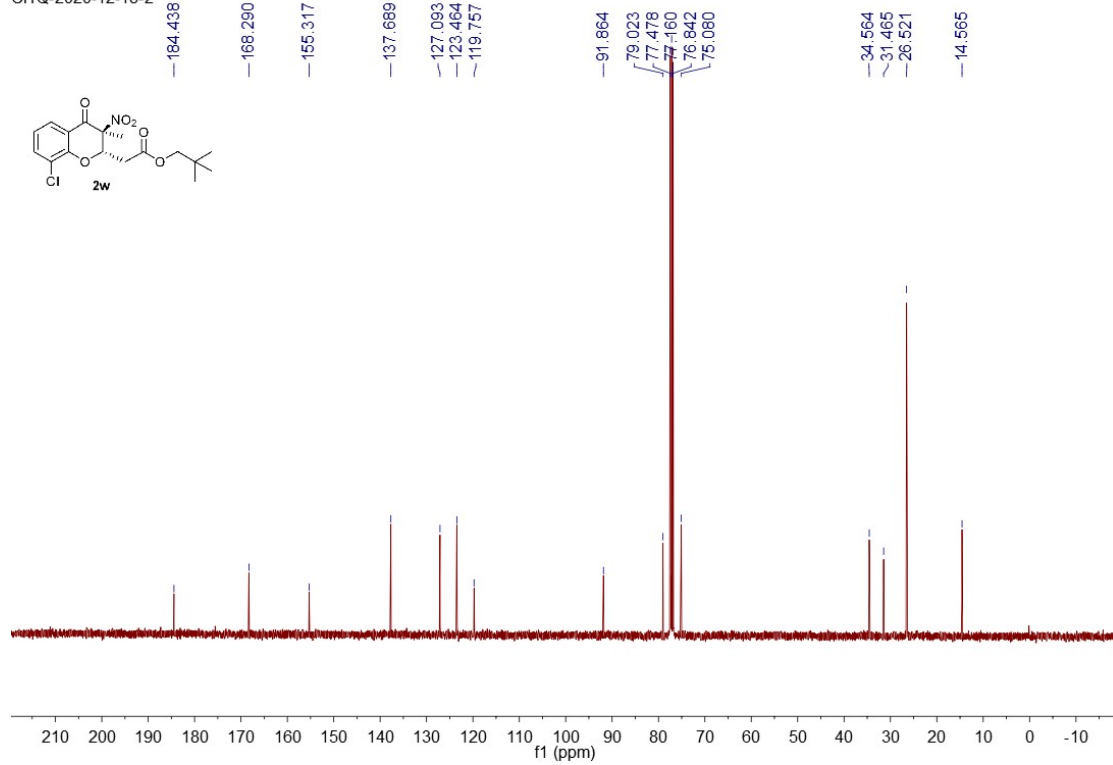

CHQ-2020-12-15-4

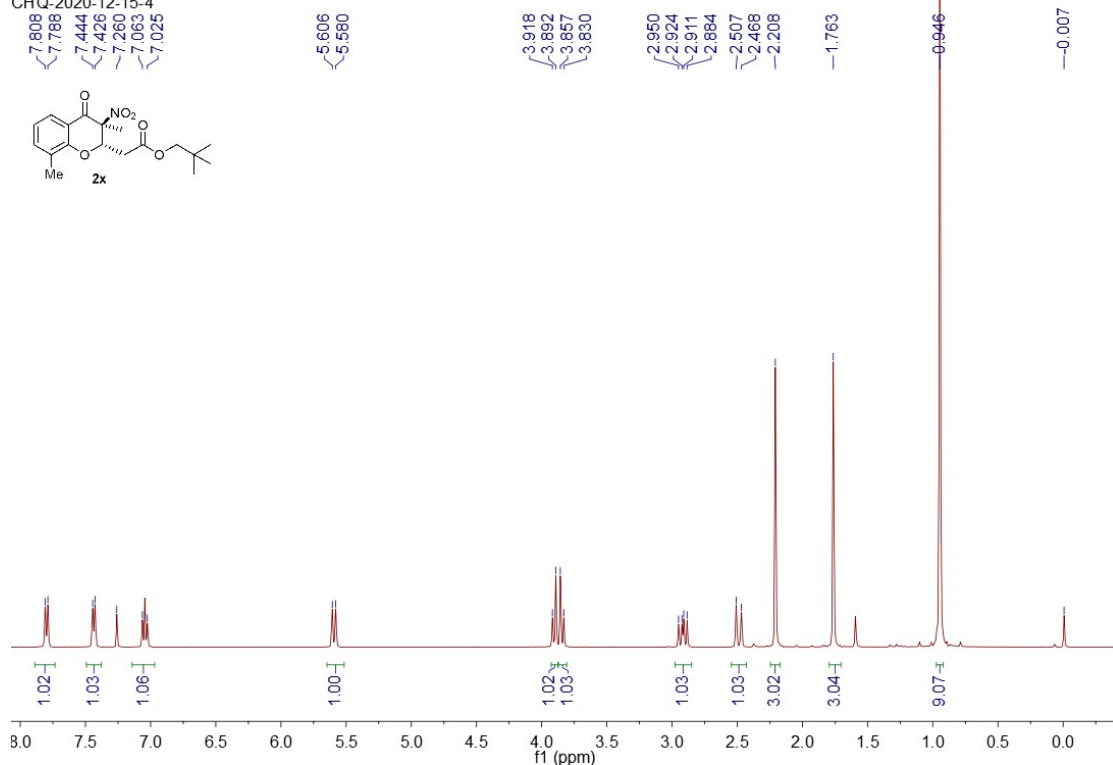

CHQ-2020-12-15-4

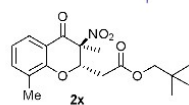

185.470

168.716

158.012

138.544

127.750

126.207

122.815

118.087

92.264

78.176

77.477

77.160

76.842

74.890

34.629

31.462

26.505

15.379

14.433

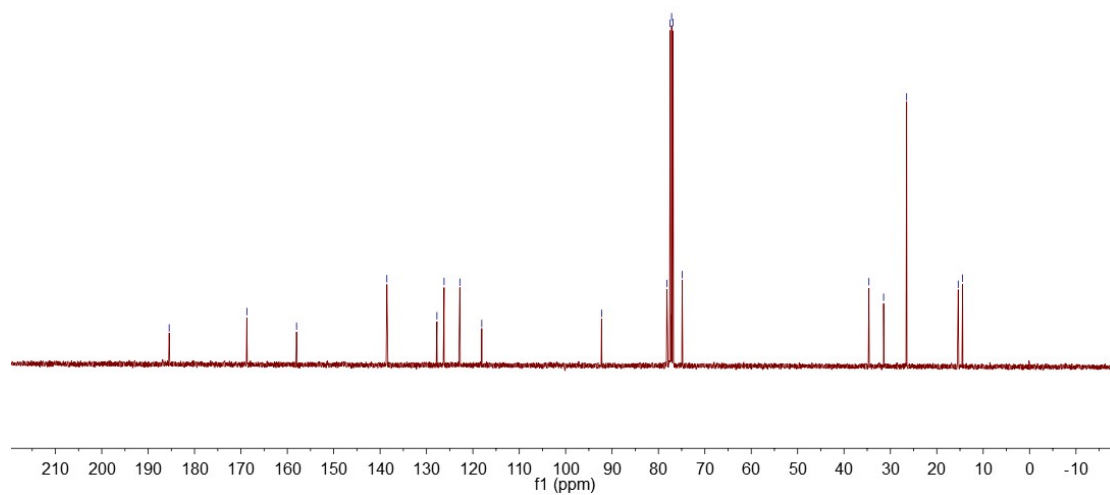

CHQ-2020-11-30-3

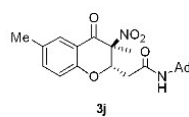

7.727

7.394

7.373

7.260

6.925

6.904

5.548

5.527

5.307

2.563

2.538

2.526

2.501

2.334

2.267

2.232

2.061

1.998

1.719

1.677

0.007

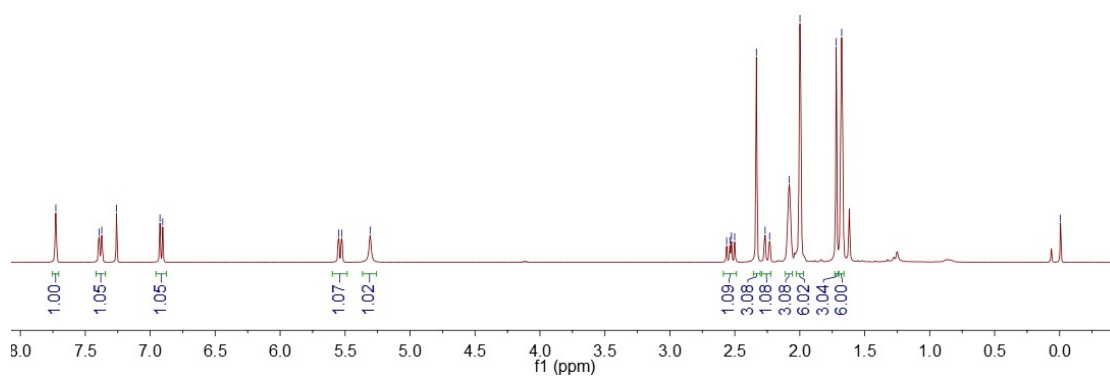

CHQ-2020-11-30-3

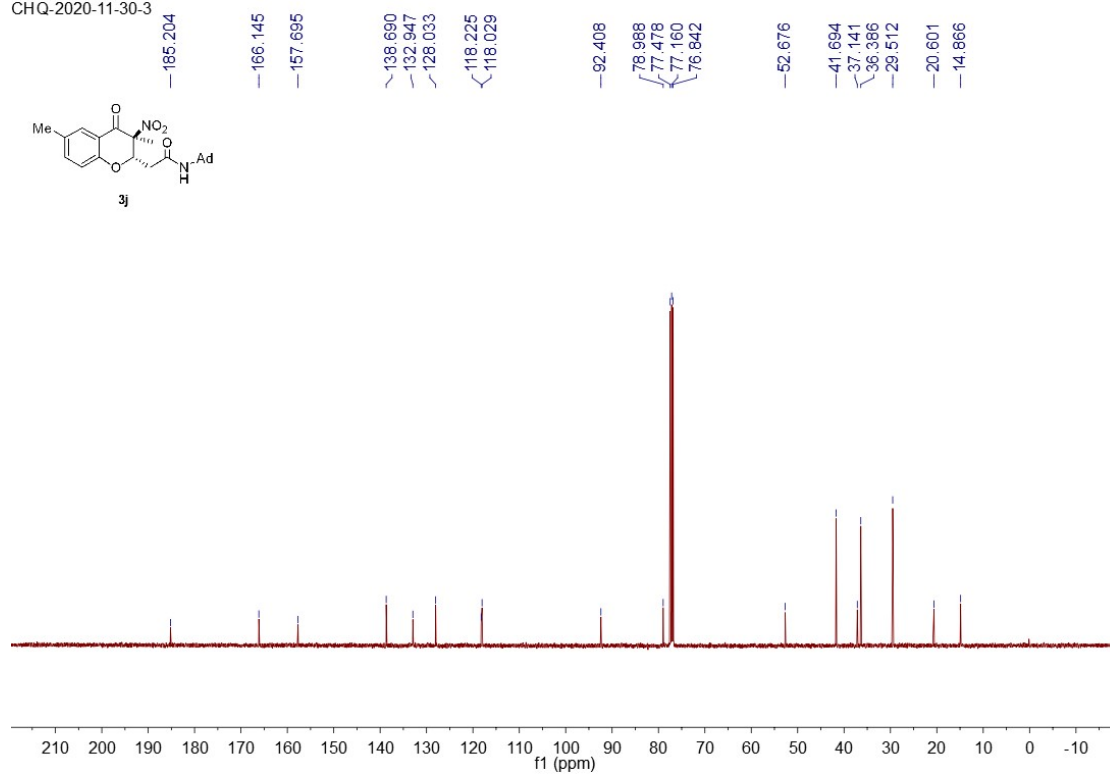

CHQ-2020-12-12-1

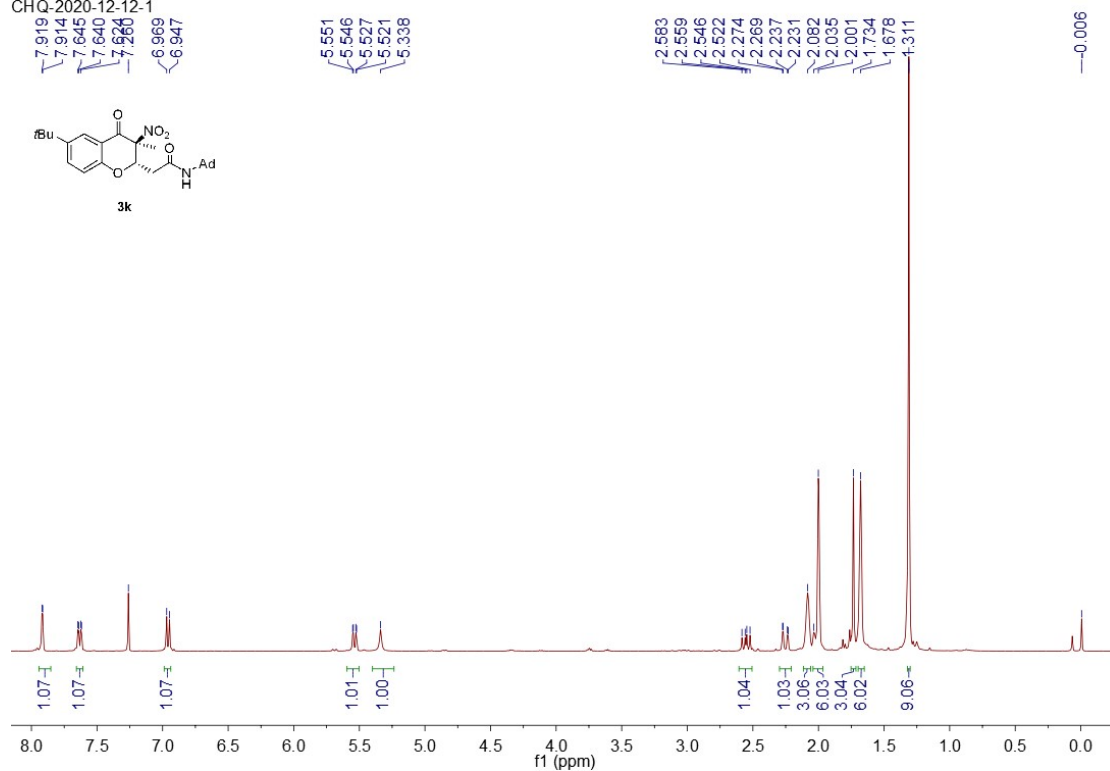

CHQ-2020-12-12-1

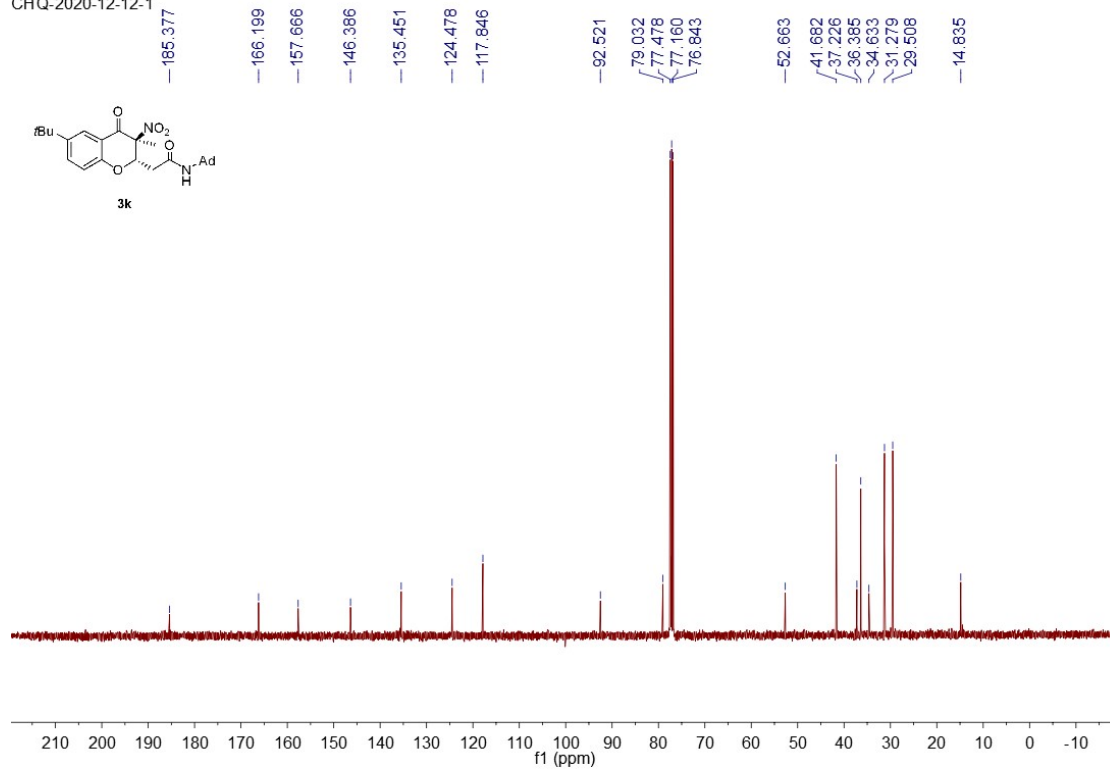

CHQ-2020-11-27-1

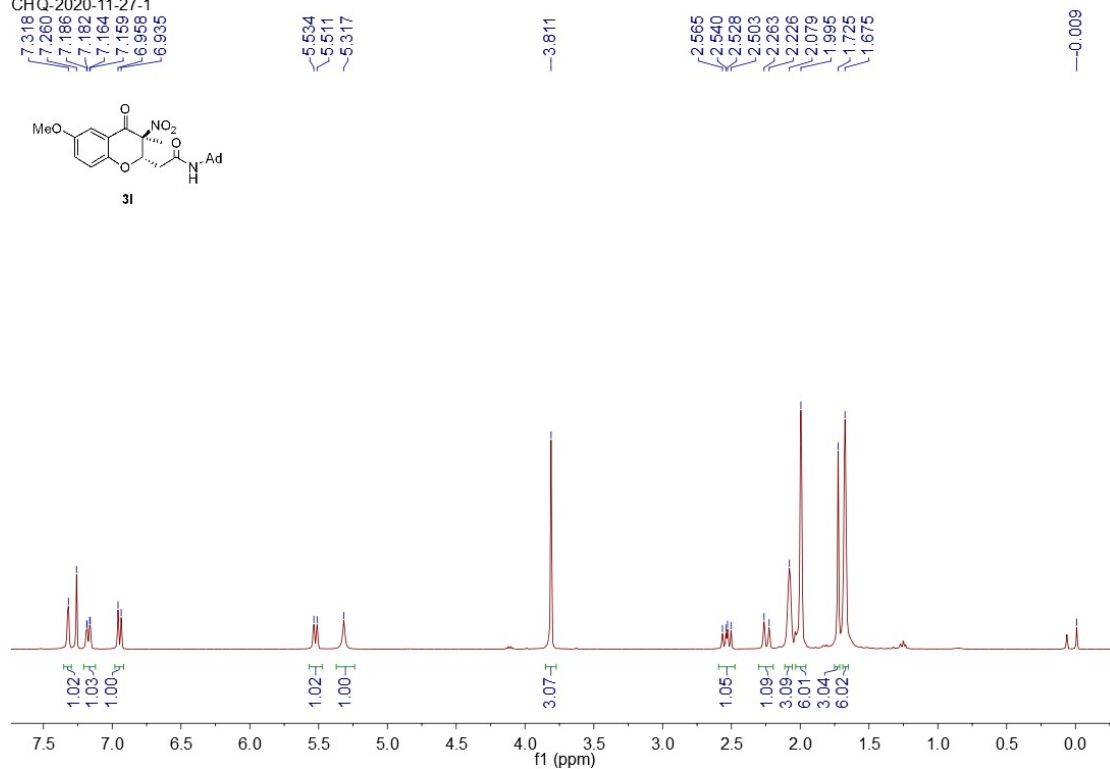

CHQ-2020-11-27-1

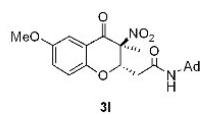

185.192  
166.149  
155.313  
154.354  
126.983  
119.582  
118.525  
108.353  
92.465  
79.194  
77.478  
77.160  
76.842  
56.021  
52.686  
41.686  
37.101  
36.374  
29.501  
14.842

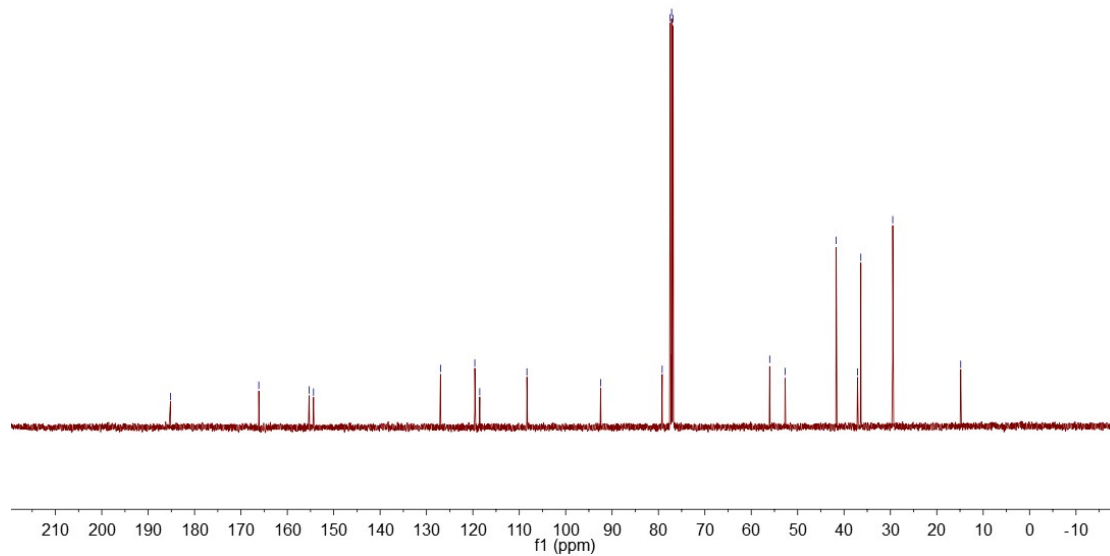

CHQ-2020-12-26-2

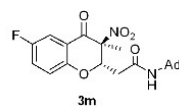

7.614  
7.607  
7.595  
7.587  
7.331  
7.282  
7.260  
7.037  
7.026  
7.014  
7.004  
5.602  
5.596  
5.578  
5.572  
5.217  
2.559  
2.535  
2.522  
2.497  
2.300  
2.294  
2.263  
2.257  
2.089  
1.997  
1.737  
1.682  
0.004

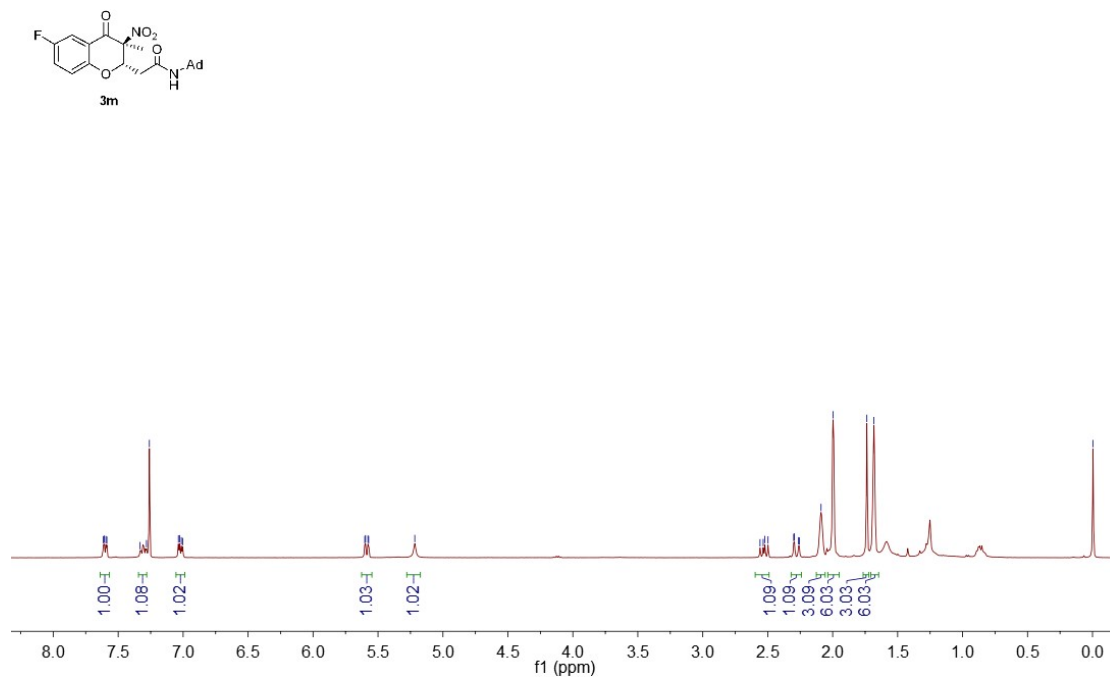



CHQ-2020-12-26-2

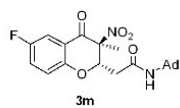

184.409  
165.836  
159.312  
156.877  
155.927  
155.910  
125.389  
125.144  
120.214  
120.138  
119.286  
119.216  
113.576  
113.338  
92.066  
79.329  
77.478  
77.160  
76.843  
52.779  
41.692  
36.889  
36.359  
29.496  
14.878

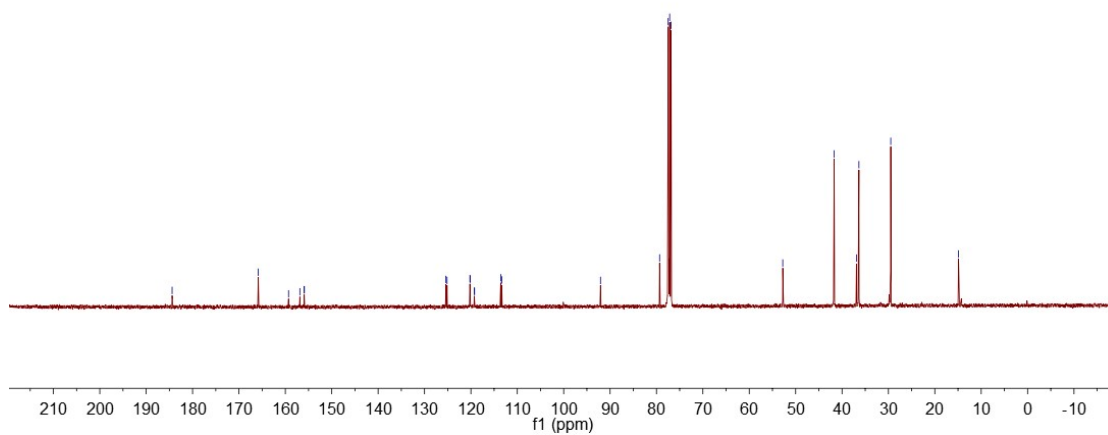

CHQ-10-5-372

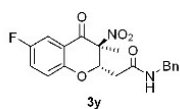

7.524  
7.506  
7.277  
7.260  
7.220  
7.177  
6.862  
6.840  
5.797  
5.593  
5.569  
4.501  
4.487  
4.463  
4.452  
4.367  
4.356  
4.329  
4.320  
2.591  
2.559  
2.554  
2.528  
2.331  
2.294  
1.658  
0.016

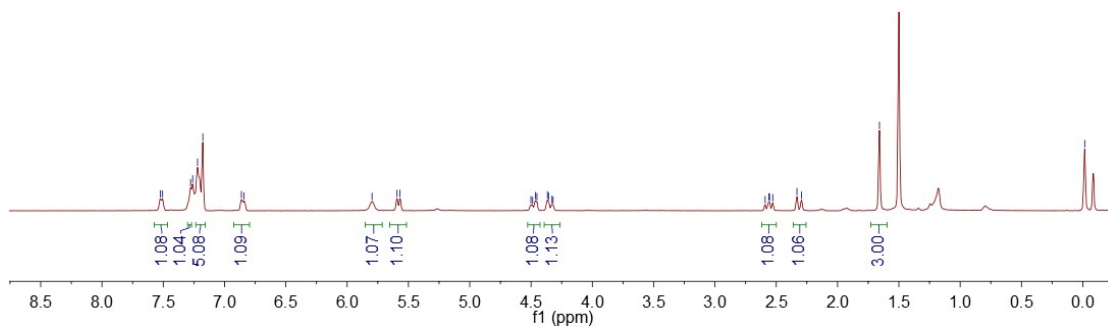

CHQ-2020-4-29-2

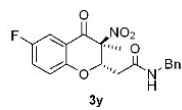

184.377  
184.357  
167.042  
159.312  
156.877  
155.840  
155.824  
137.786  
128.892  
127.867  
125.452  
125.207  
120.172  
120.096  
119.129  
119.059  
113.536  
113.297  
92.080  
79.074  
77.477  
77.160  
76.842  
44.031  
35.976  
14.662

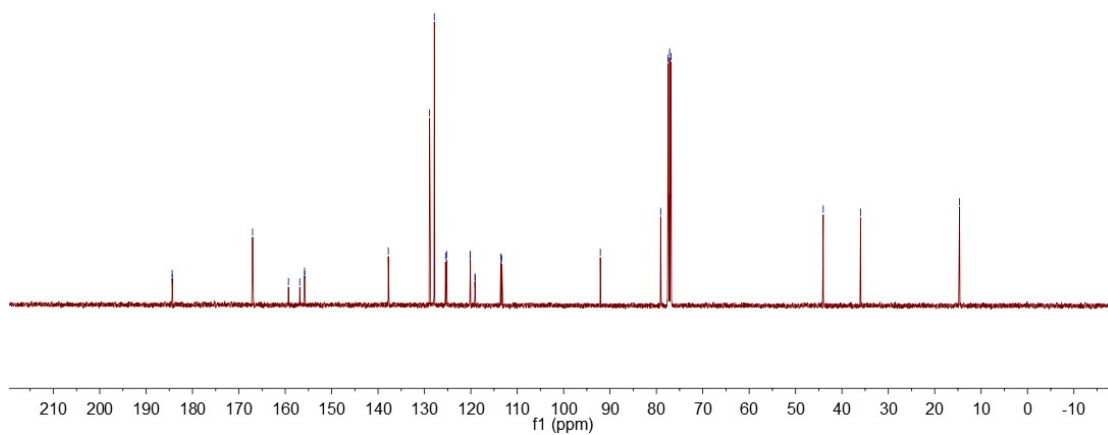

CHQ-10-5-372

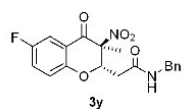

118.285

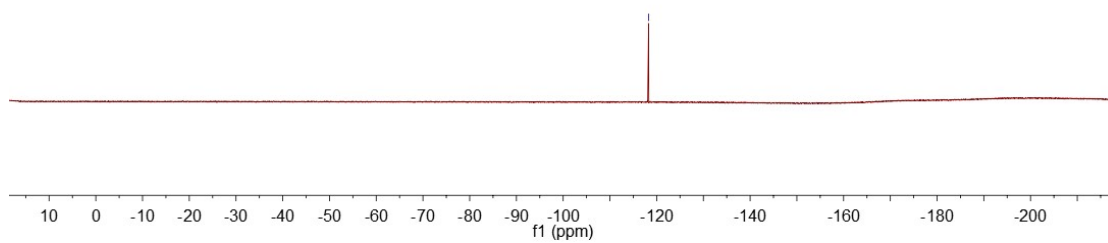

Supplement: d1ob01296g1.pdf [file d1ob01296g1.pdf]
